# Supplementary material
Source: Research Square preprint supplement (doi:10.21203/rs.3.rs-9089829/v1)
Supplement: Supplementary file 1 [file 0ed997b9604e1164010cd54d.docx]

**Supplementary Information for**

Field-channel synergistic engineering in gradient-doped 2D overlayers for high-efficiency solar water splitting

Xin Ding1, Keng Chen1, Hengjun Xie2, Tongxin Tang1, Wenhao Zou2, Huashu Sun1, Shuang Xiao3, Shanqing Zhang2, Teng-Xiang Huang1,4, Kai-Hang Ye*2,5, Yang Cao*1,4, Shihe Yang6,7

1. State Key Laboratory of Physical Chemistry of Solid Surfaces, Collaborative Innovation Center of Chemistry for Energy Materials (iChEM), College of Chemistry and Chemical Engineering, Xiamen University, Xiamen, 361005, P. R. China

2. Institute for Sustainable Transformation, School of Chemical Engineering and Light Industry, Guangdong University of Technology, Guangzhou, 510006, China

3. Shenzhen Key Laboratory of Ultraintense Laser and Advanced Material Technology, Center for Intense Laser Application Technology (iLaT) and College of Engineering Physics, Shenzhen Technology University, Shenzhen 518118, China

4. Innovation Laboratory for Sciences and Technologies of Energy Materials of Fujian Province (IKKEM), Xiamen 361005, China

5. Huizhou Research Institute, Sun Yat-Sen University, 516081, Huizhou, China

6. School of Advanced Materials, Peking University Shenzhen Graduate School, Shenzhen 518055, China

7. Department of Chemistry, The Hong Kong University of Science and Technology, Clear Water Bay, Kowloon, Hong Kong, China; Institute of Biomedical Engineering, Shenzhen Bay Laboratory, Shenzhen 518107, China

* Corresponding authors:

yekh@gdut.edu.cn; yangcao@xmu.edu.cn;

The PDF file includes:

Figures S1 to S45

Tables S1 to S3


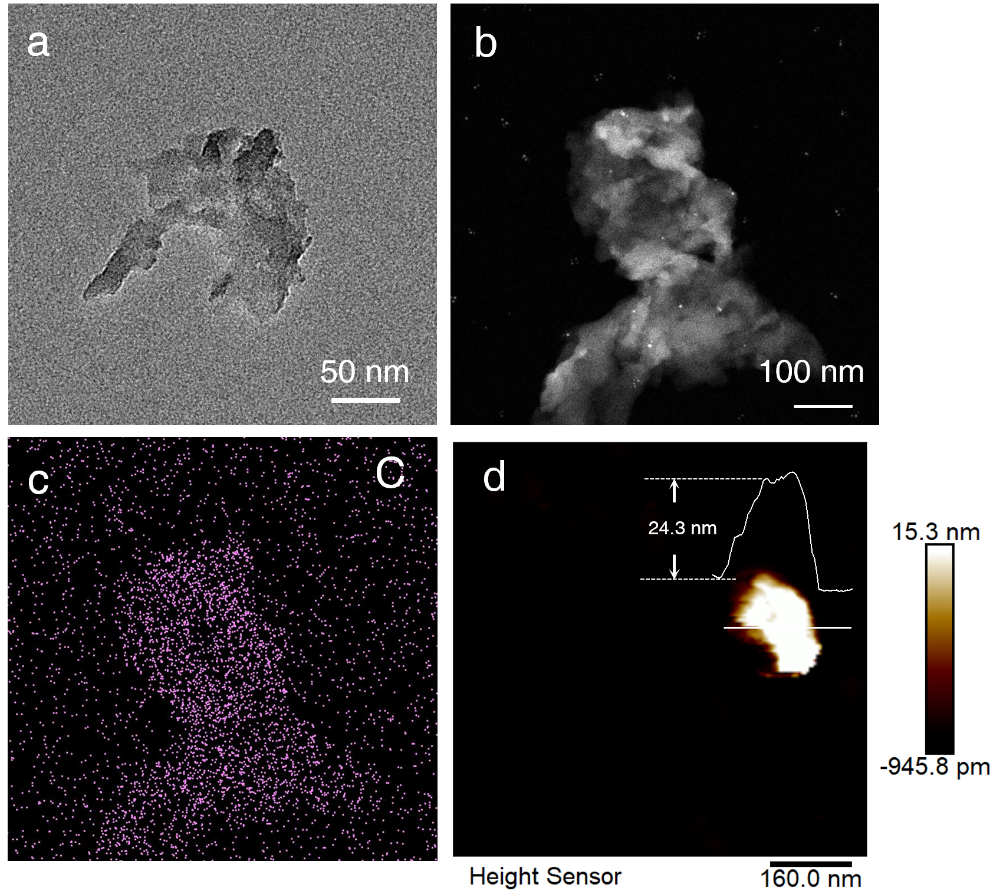


**Supplementary Fig. 1.** **Catalyst microscopy**. **a**, TEM image of C3N5. **b**, STEM image of C3N5. **c**, Elemental mappings of C acquired from b. **d**, AFM images of C3N5 on a silicon wafer, with the height profile determined along the line shown in the inset.


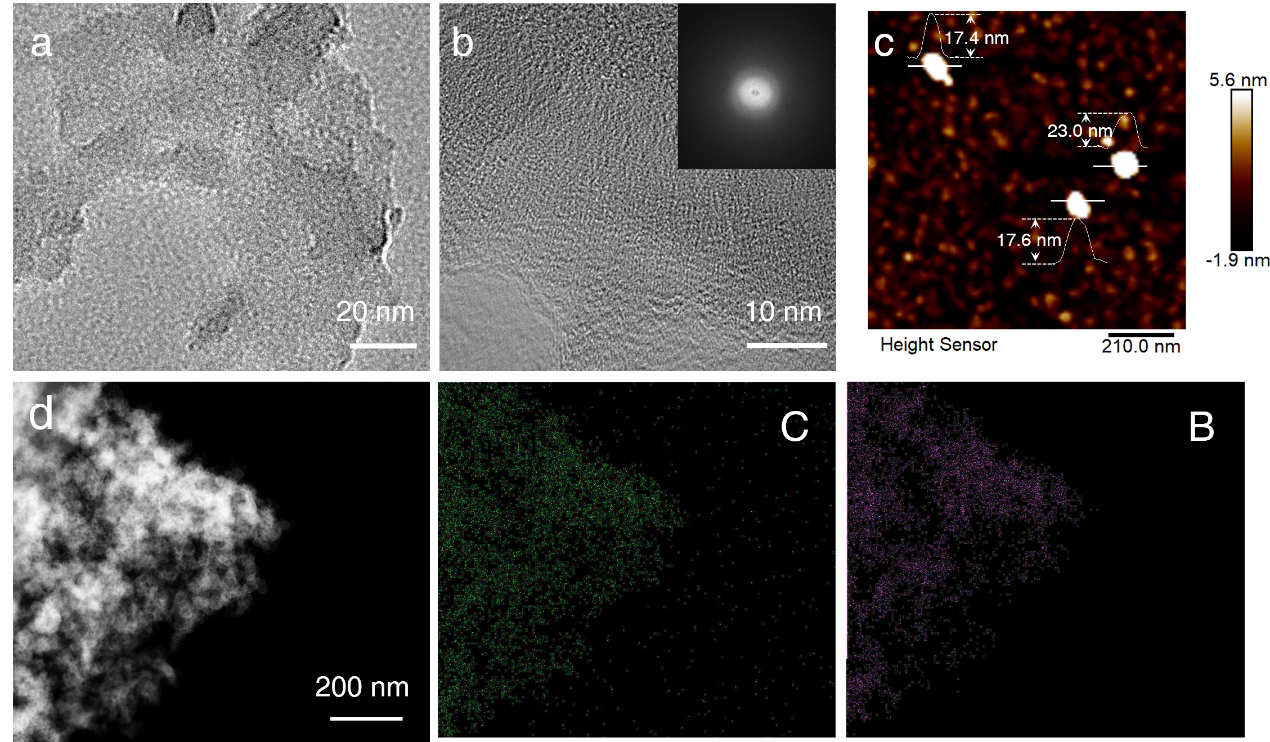


**Supplementary Fig. 2.** **Catalyst microscopy**. **a-b**, TEM images of B:C3N5-x. **c**, AFM images of B:C3N5-x on a silicon wafer, with the height profile determined along the line shown in the inset. **d**, STEM image of B:C3N5-x and elemental mappings of B, C, N. After further NaBH4 heat treatment, the material maintained its nanosheet morphology with no significant change in thickness. Elemental mapping revealed homogeneous distribution of B atoms within the C3N5 nanosheets, further confirming the successful incorporation of B atoms.


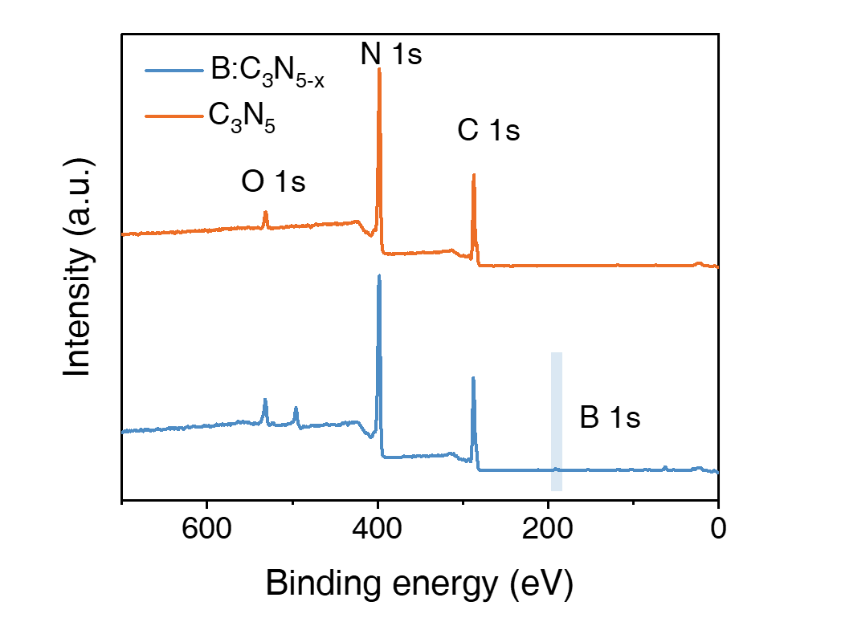


**Supplementary Fig. 3. XPS spectra of C3N5 and B:C3N5-x.** Survey XPS spectra. Compared with pure C3N5, the XPS survey spectrum of B:C3N5-x exhibits distinct N 1s and C 1s peaks, along with an additional B 1s peak. Furthermore, the high-resolution B 1s spectrum reveals that its peak is located at 191.7 eV, which is consistent with recent study.


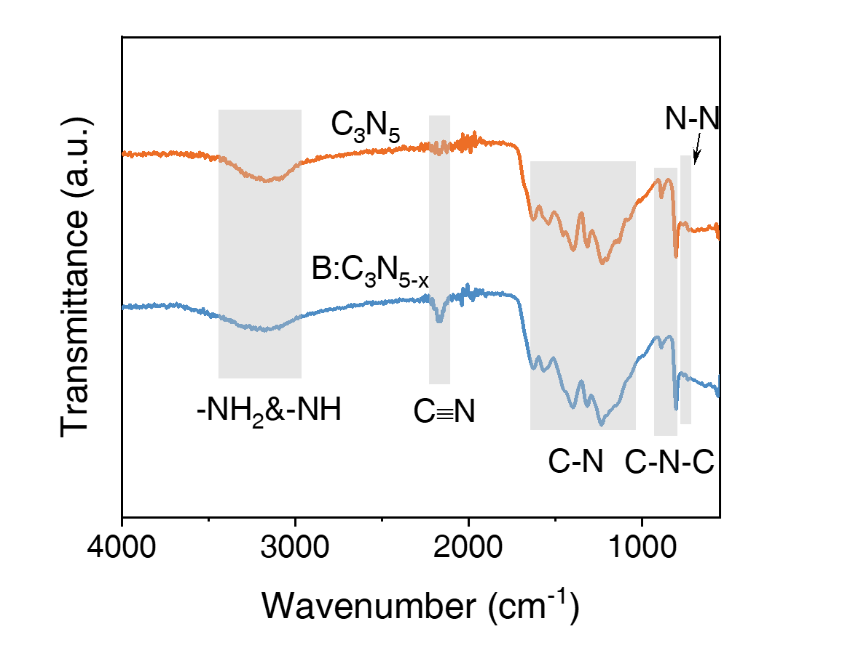


**Supplementary Fig. 4.** **FTIR spectra of C3N5 and B:C3N5-x**. A peak at 764 cm-1 of C3N5 and B:C3N5-x correspond to the N-N bond of the triazole moiety, unlike C3N4 which only has a tri-s-triazine (heptazine) structure, thus proving the successful synthesis of C3N5. Both C3N5 and B:C3N5-x present a peak at 806 cm-1 typical for the out-of-plane bending mode of tri-s-triazine (heptazine) rings. Additionally, whilst the peaks locating between 900 and 1800 cm-1 originate from the stretching modes of aromatic C-N heterocycles. In comparison, B:C3N5-x displays a decrease in the intensity of the N-H stretching peaks between 3000 and 3500 cm-1, and a new peak emerging at 2175 cm-1, which should be corresponding to the asymmetric stretching vibration of cyano (-C≡N) groups. These observations suggest that the calcination treatment of NaBH4 introduces more N vacancies into C3N5.


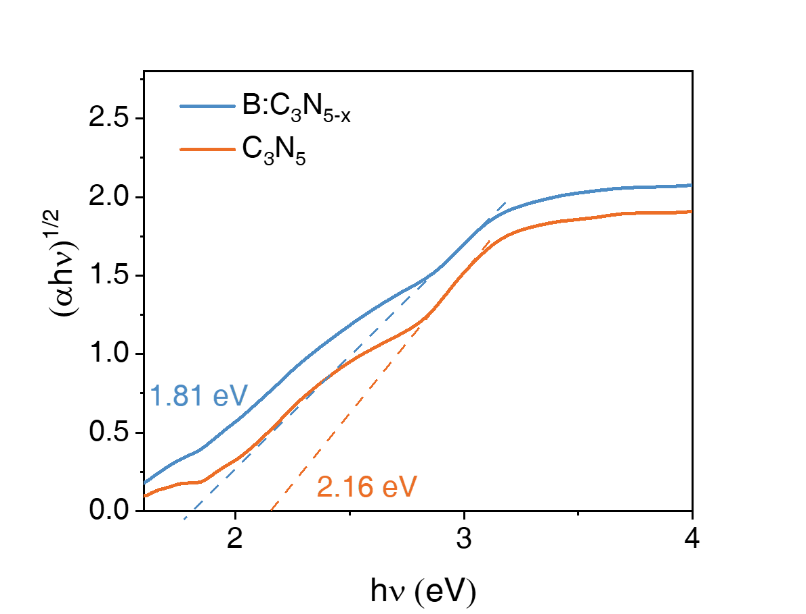


**Supplementary Fig. 5. Light absorption capacity characterization.** Corresponding Tauc plots for C3N5 and B:C3N5-x using (αhν)1/2 (Kubelka–Munk parameter) as a function versus the photon energy. The intrinsic bandgaps are 2.16 and 1.88 eV for C3N5 and B:C3N5-x, respectively.


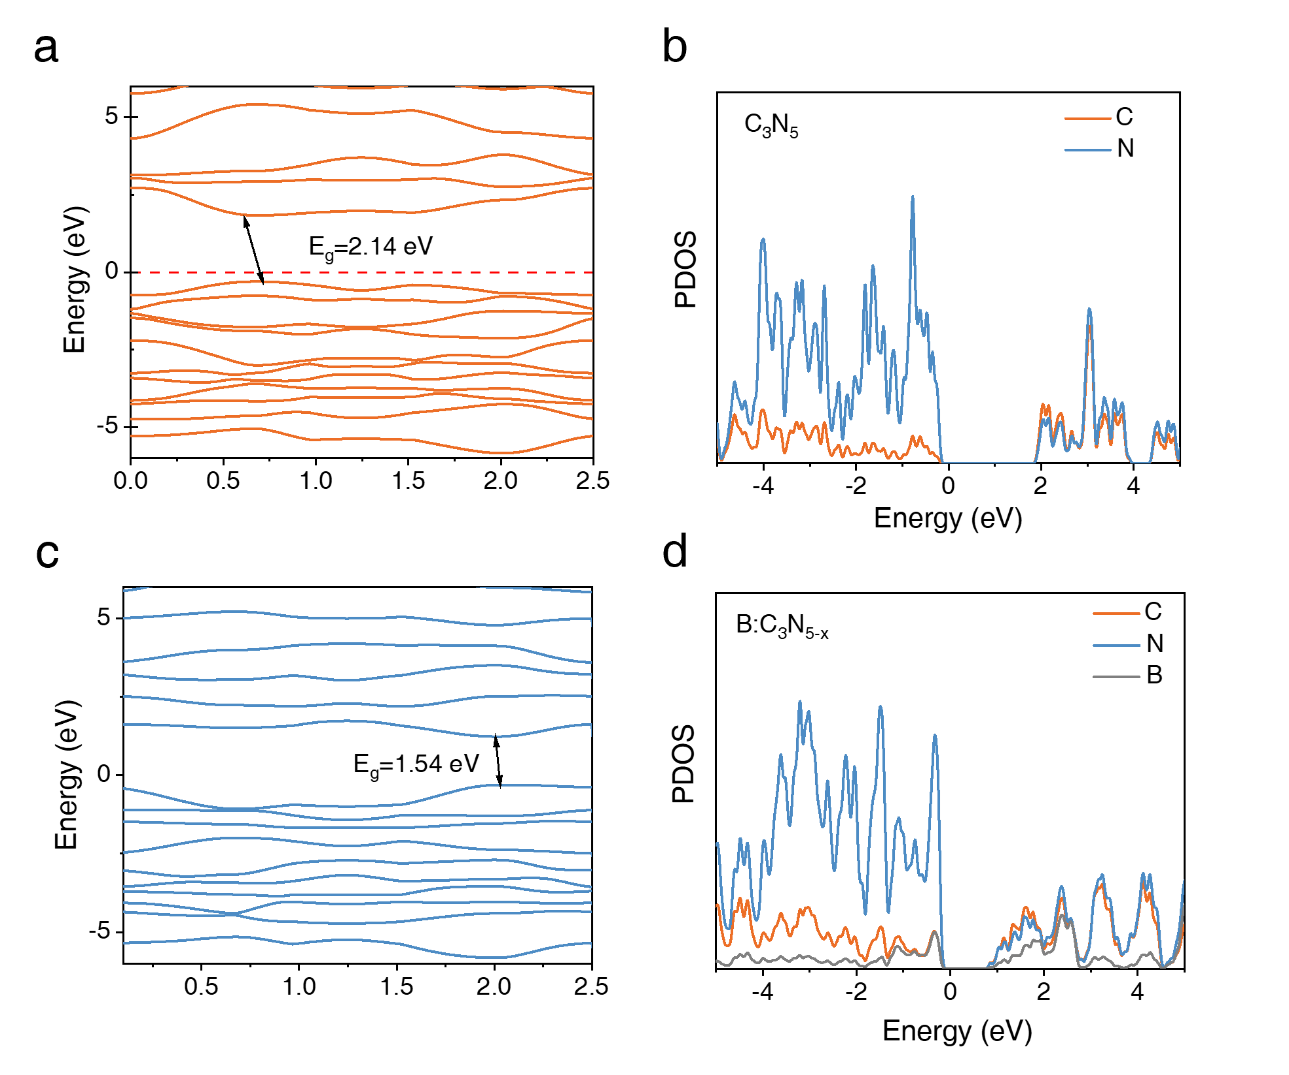


**Supplementary Fig. 6.** **Theoretical calculations of band structure.** **a,** band structure of C3N5. **b**, PDOS plots of C3N5. **c**, band structure of B:C3N5-x. **d**, PDOS plots of B:C3N5-x.


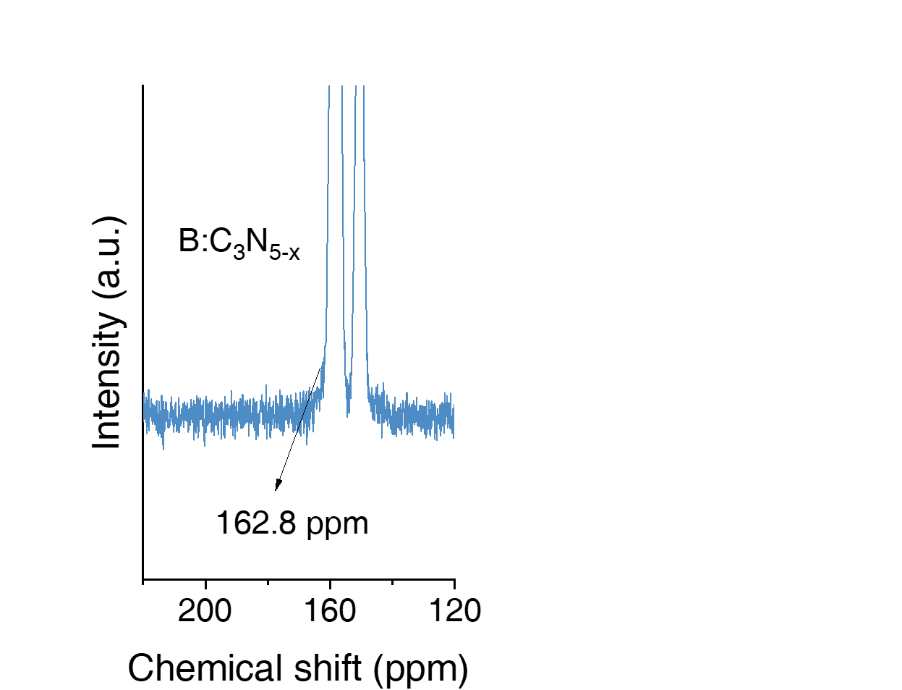


**Supplementary Fig. 7**. **MAS-NMR spectrum.** Solid-state 13C MAS-NMR spectrum of B:C3N5-x.


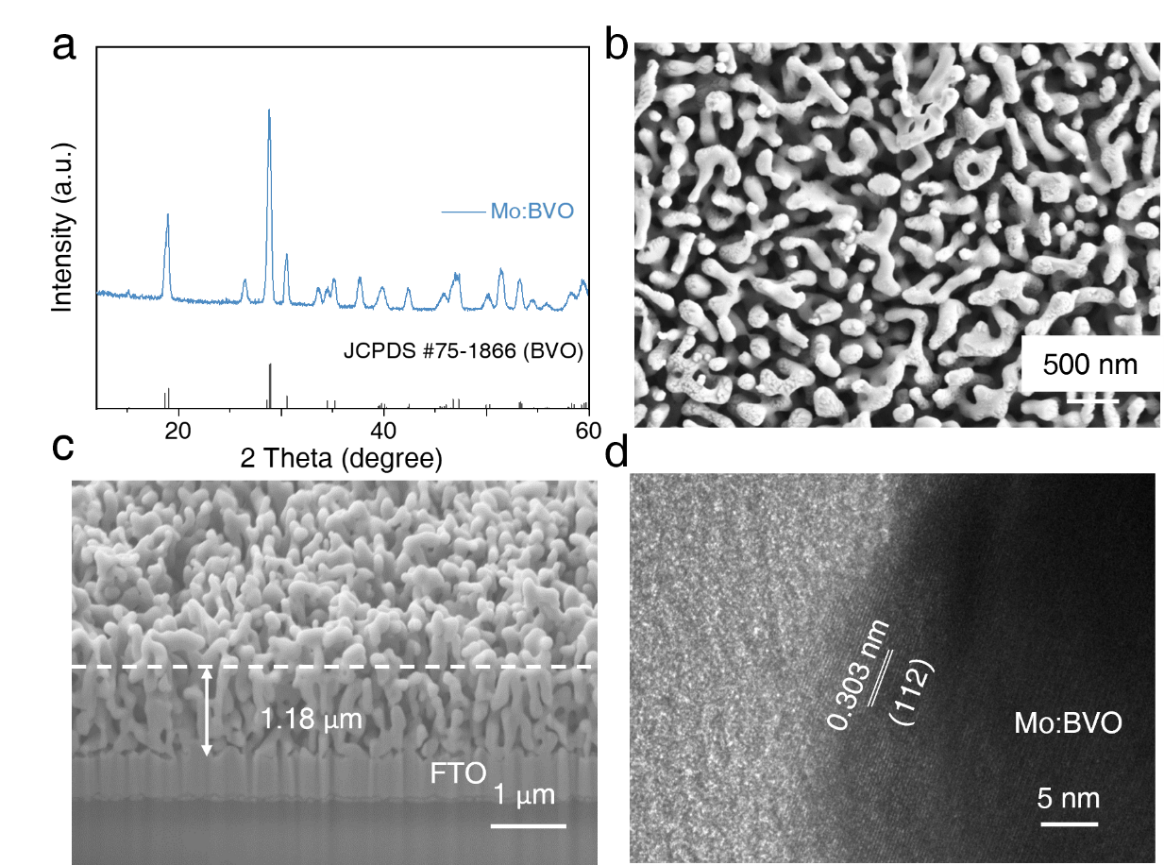


**Supplementary Fig. 8. Structural properties of Mo:BVO. a**, XRD pattern of Mo:BVO. **b**, Top-view SEM image of Mo:BVO. **c**, cross-section SEM image of Mo:BVO. **d** TEM image of Mo:BVO.


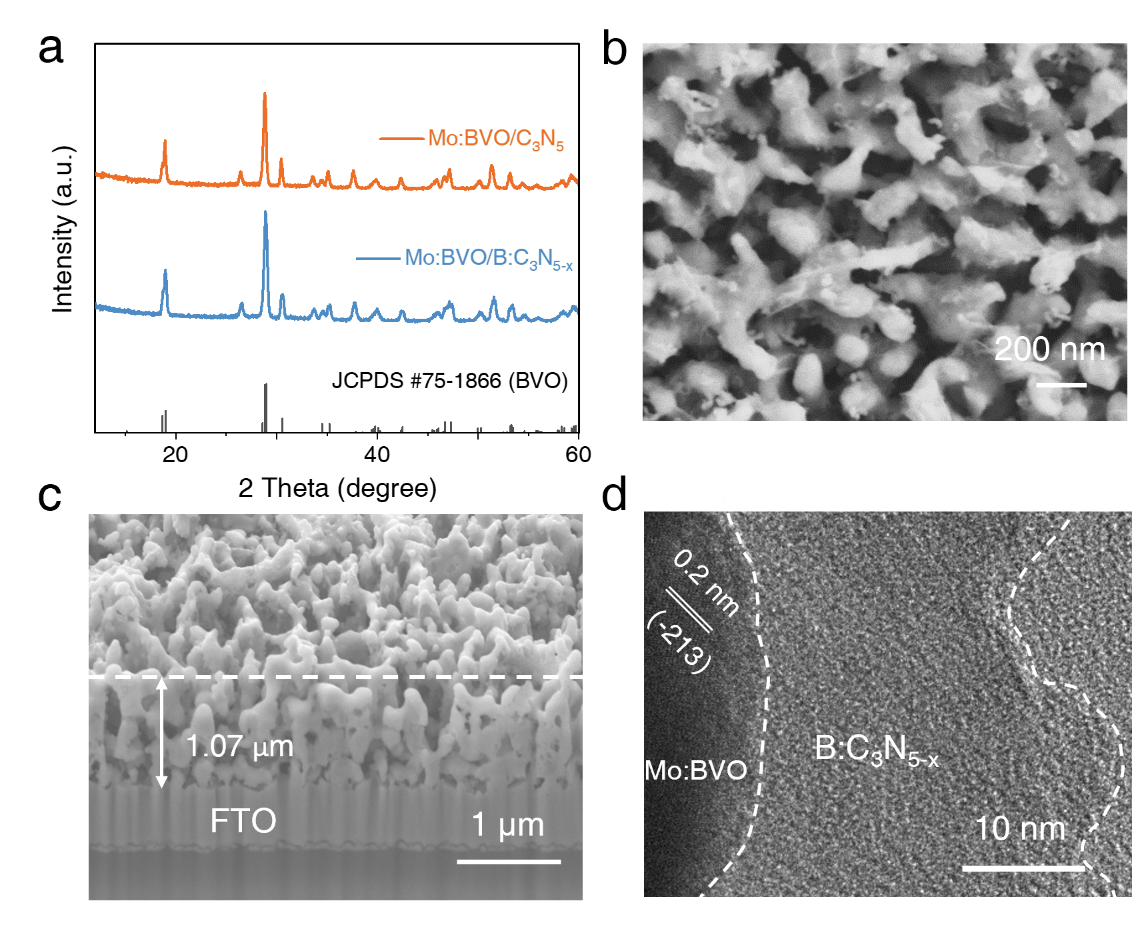


**Supplementary Fig. 9. Structural properties of Mo:BVO/B:C3N5-x**. **a**, XRD pattern of Mo:BVO/C3N5 and Mo:BVO/B:C3N5-x. **b**, Top-view SEM images of Mo:BVO/B:C3N5-x. **c**, Side-view SEM images of Mo:BVO/B:C3N5-x **d,** TEM image of Mo:BVO/B:C3N5-x.


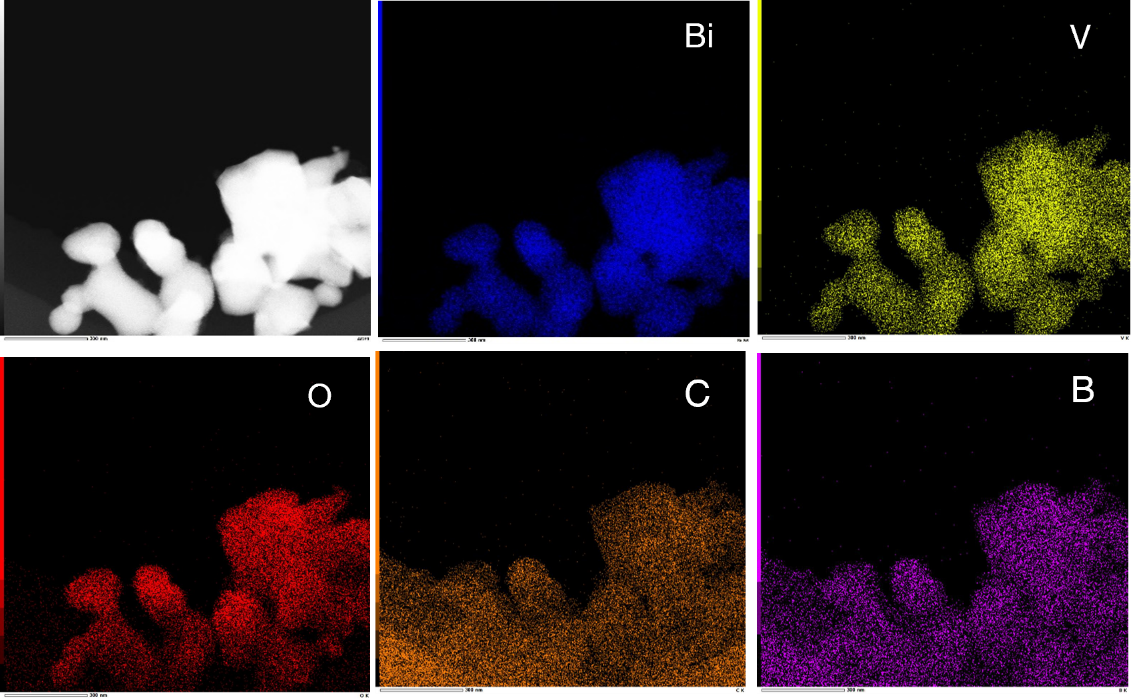


**Supplementary Fig. 10.** **Structural properties of Mo:BVO/B:C3N5-x**. EDX mapping images for Bi, V, O, C and B, respectively.


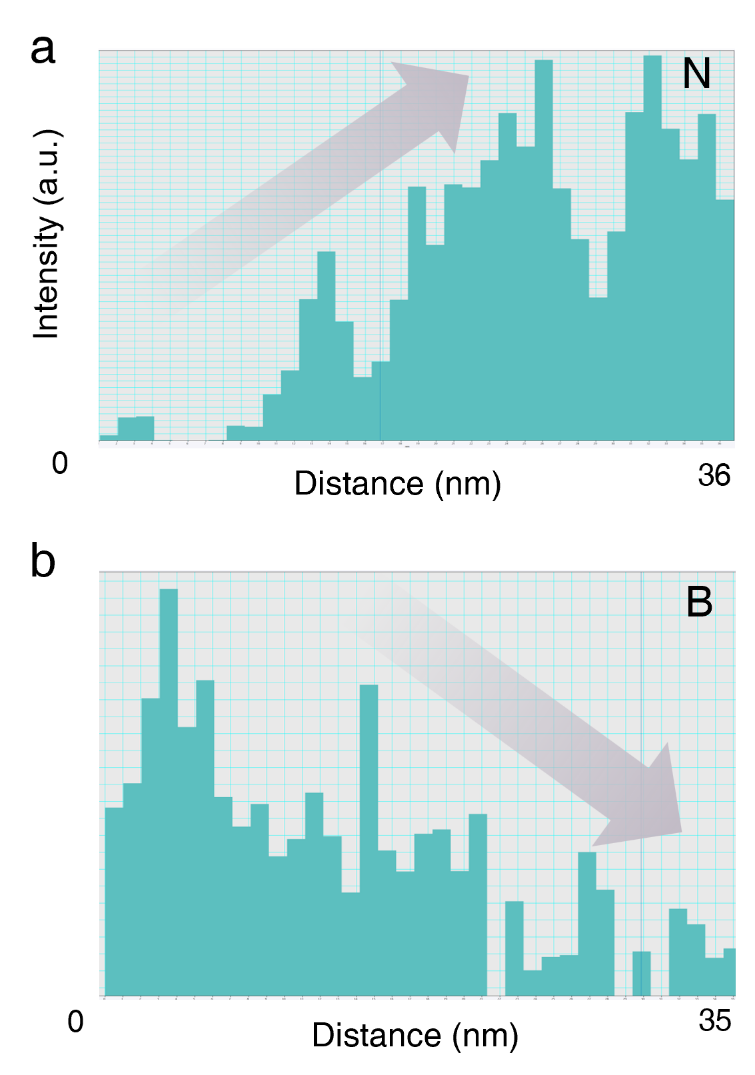


**Supplementary Fig. 11. Strength of EELS line profiling.** Intensity of elements of **a**, N and **b**, B under line profiling of Mo:BVO/B:C3N5-x with calcination.


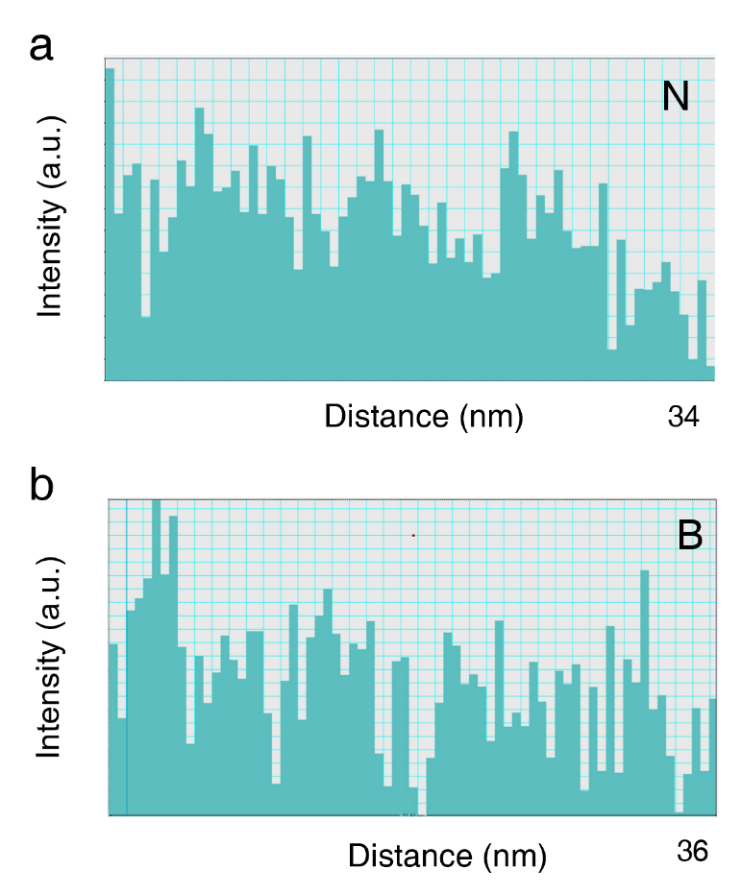


**Supplementary Fig. 12. Strength of EELS line profiling.** Intensity of elements of **a**, N and **b**, B under line profiling of Mo:BVO/B:C3N5-x without calcination.


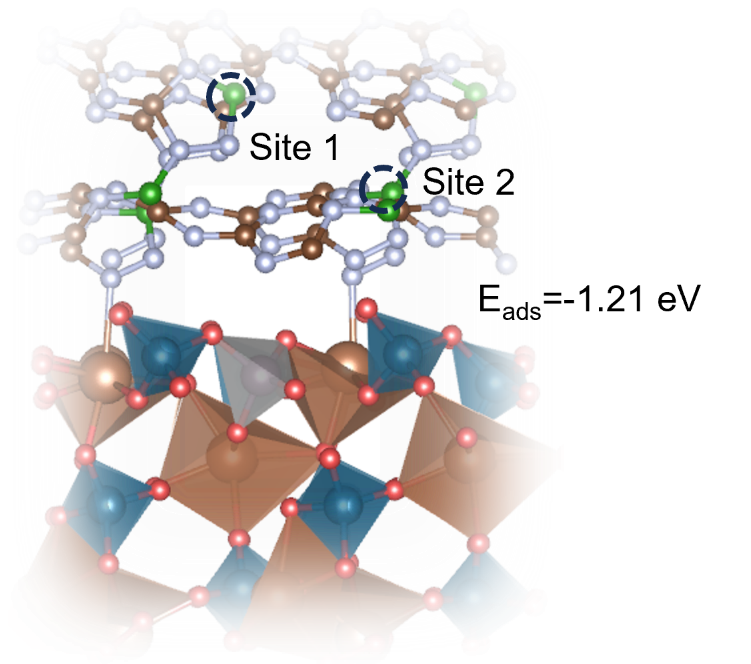


**Supplementary Fig. 13. DFT calculation.** The model of Mo:BVO/B:C3N5-x, where site1 and site 2 represent B atoms near and far from the Mo:BVO interface, respectively. The adsorption energy (Eads) of Mo:BVO for B:C3N5-x is -1.21 eV. These remarkably high values indicate that B atoms near the interface are strongly bonded and unlikely to detach from the structure. However, moving just one layer away from the Mo:BVO interface, the B-atom detachment energy decreases by 3.91 eV. This significant reduction suggests that B atoms become increasingly prone to detachment as the distance from the interface increases, which explains the observed gradient decrease in boron concentration from the interface toward the surface.


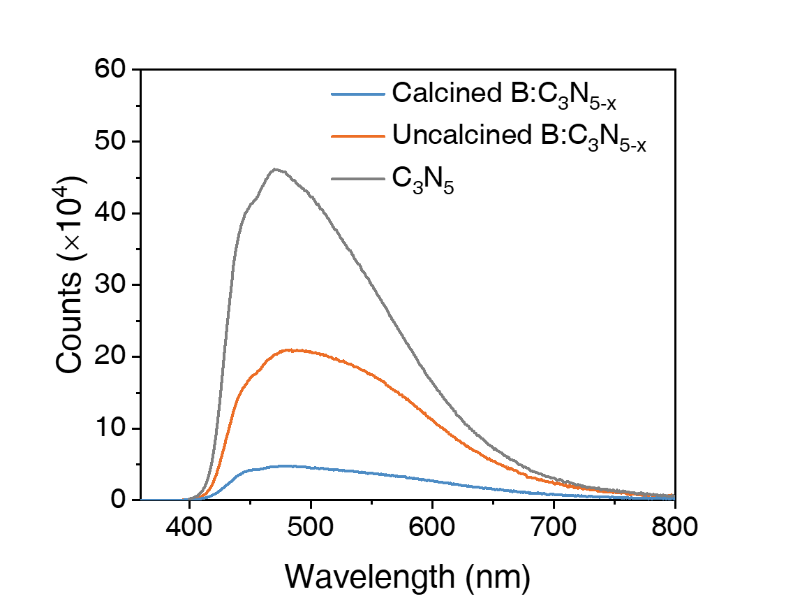


**Supplementary Fig. 14. Carrier separation capability characterization.** PL spectra of C3N5, uncalcined B:C3N5-x and calcined B:C3N5-x by 340 nm excitation wavelength.


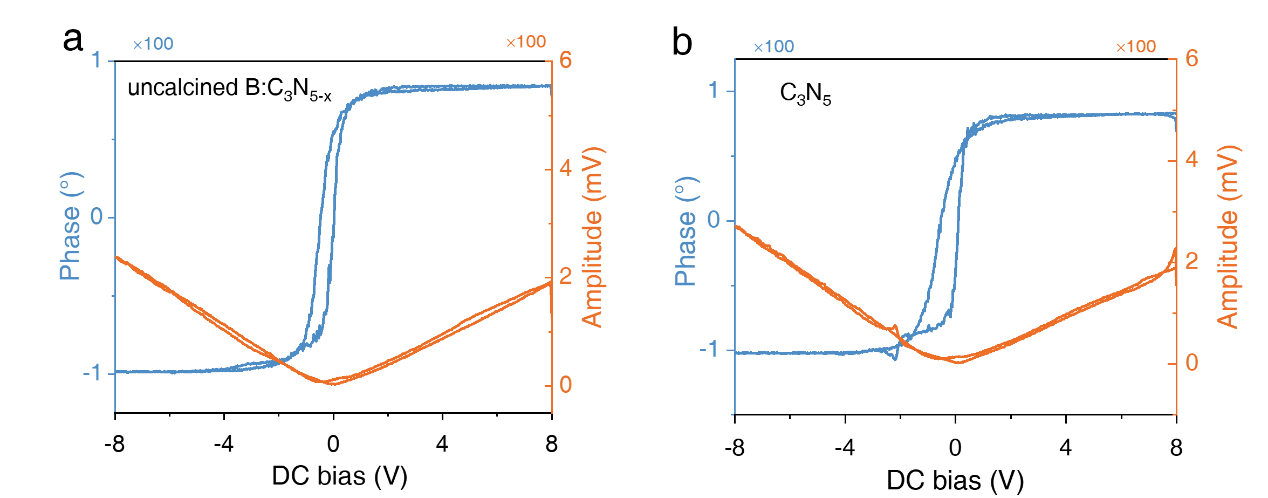


**Supplementary Fig. 15. Vertical dipole field characterization.** Phase hysteresis loop and amplitude butterfly loop of **a**, calcinated B:C3N5-x and **b**, C3N5.


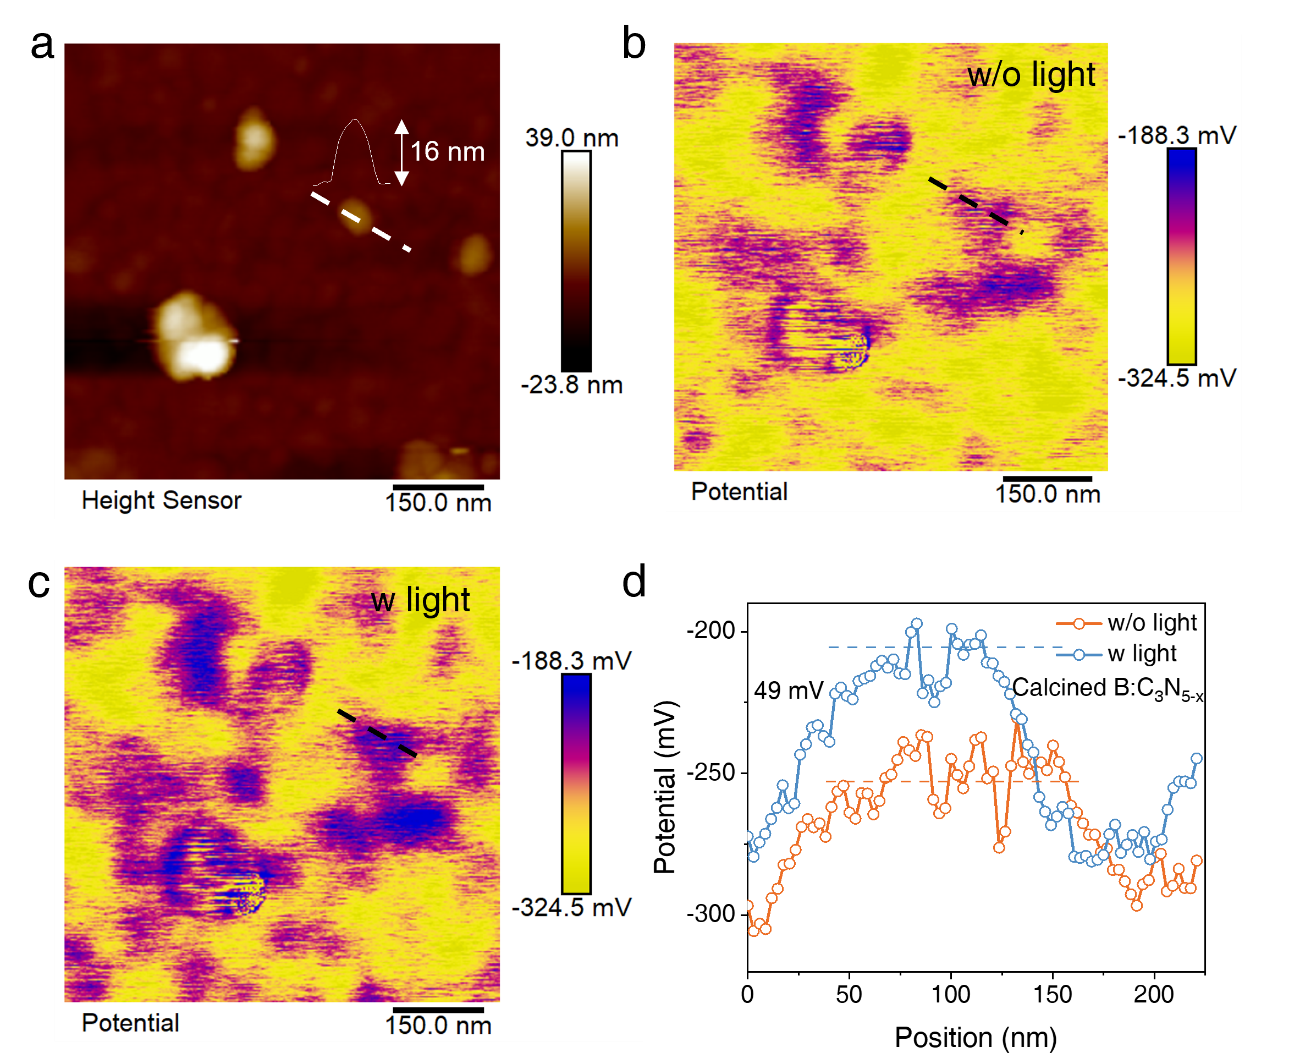


**Supplementary Fig. 16. Vertical dipole field characterization. a,** AFM image of calcined B:C3N5-x. Scanning KPFM images of calcined B:C3N5-x without **b** and **c** with light illumination. **d**, The comparison calcined B:C3N5-x of the line-scanning surface potential with and without light illumination.


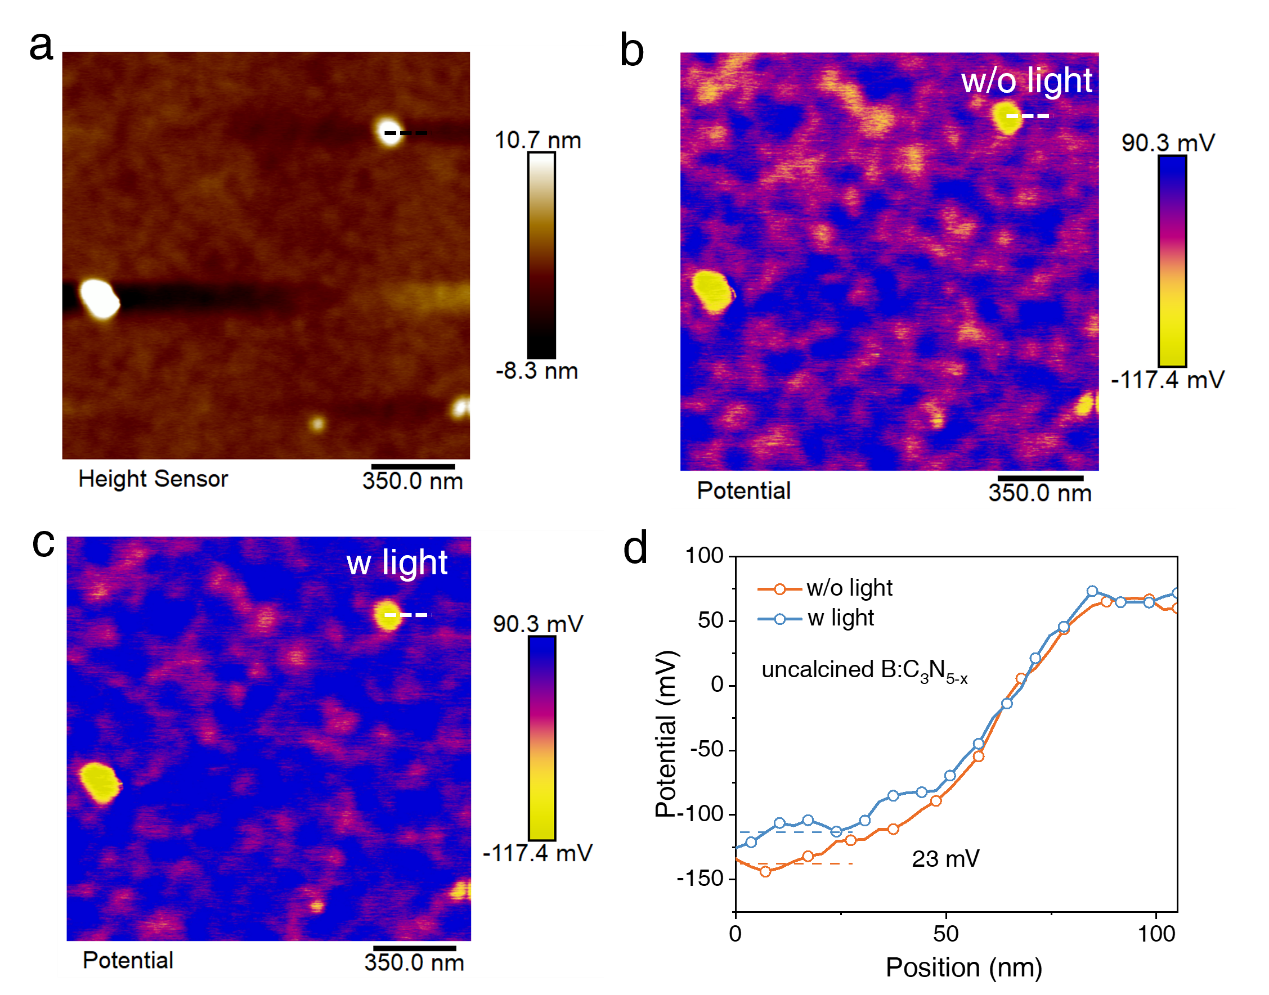


**Supplementary Fig. 17. Vertical dipole field characterization. a,** AFM image of uncalcined B:C3N5-x. Scanning KPFM images of uncalcined B:C3N5-x without **b** and **c** with light illumination. **d**, The uncalcined B:C3N5-x of the line-scanning surface potential with and without light illumination.


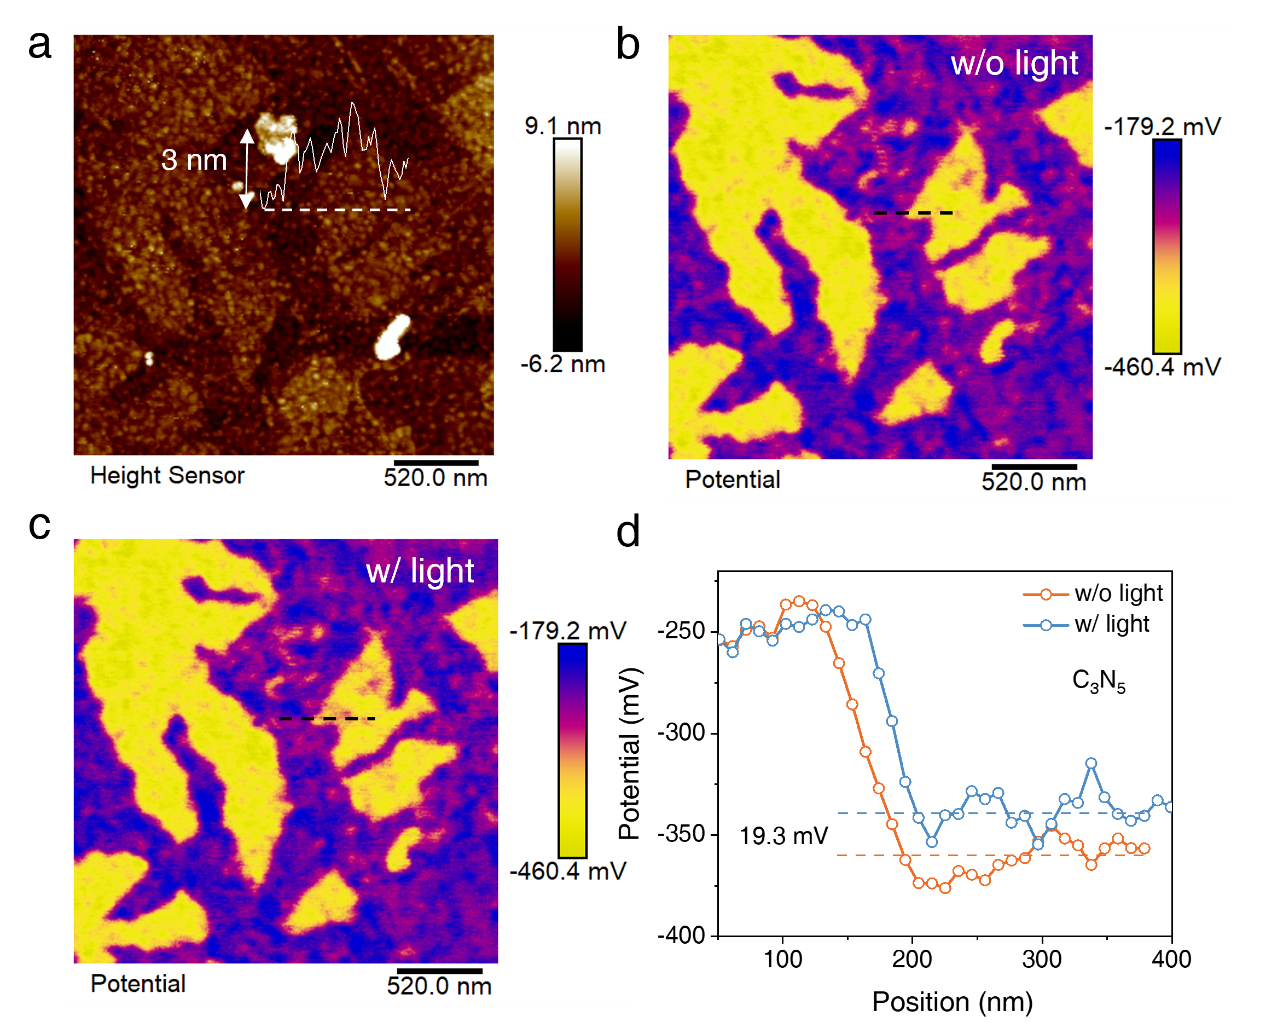


**Supplementary Fig. 18. Vertical dipole field characterization. a,** AFM image of C3N5. Scanning KPFM images of C3N5 without **b** and **c** with light illumination. **d**, The comparison C3N5 of the line-scanning surface potential with and without light illumination.


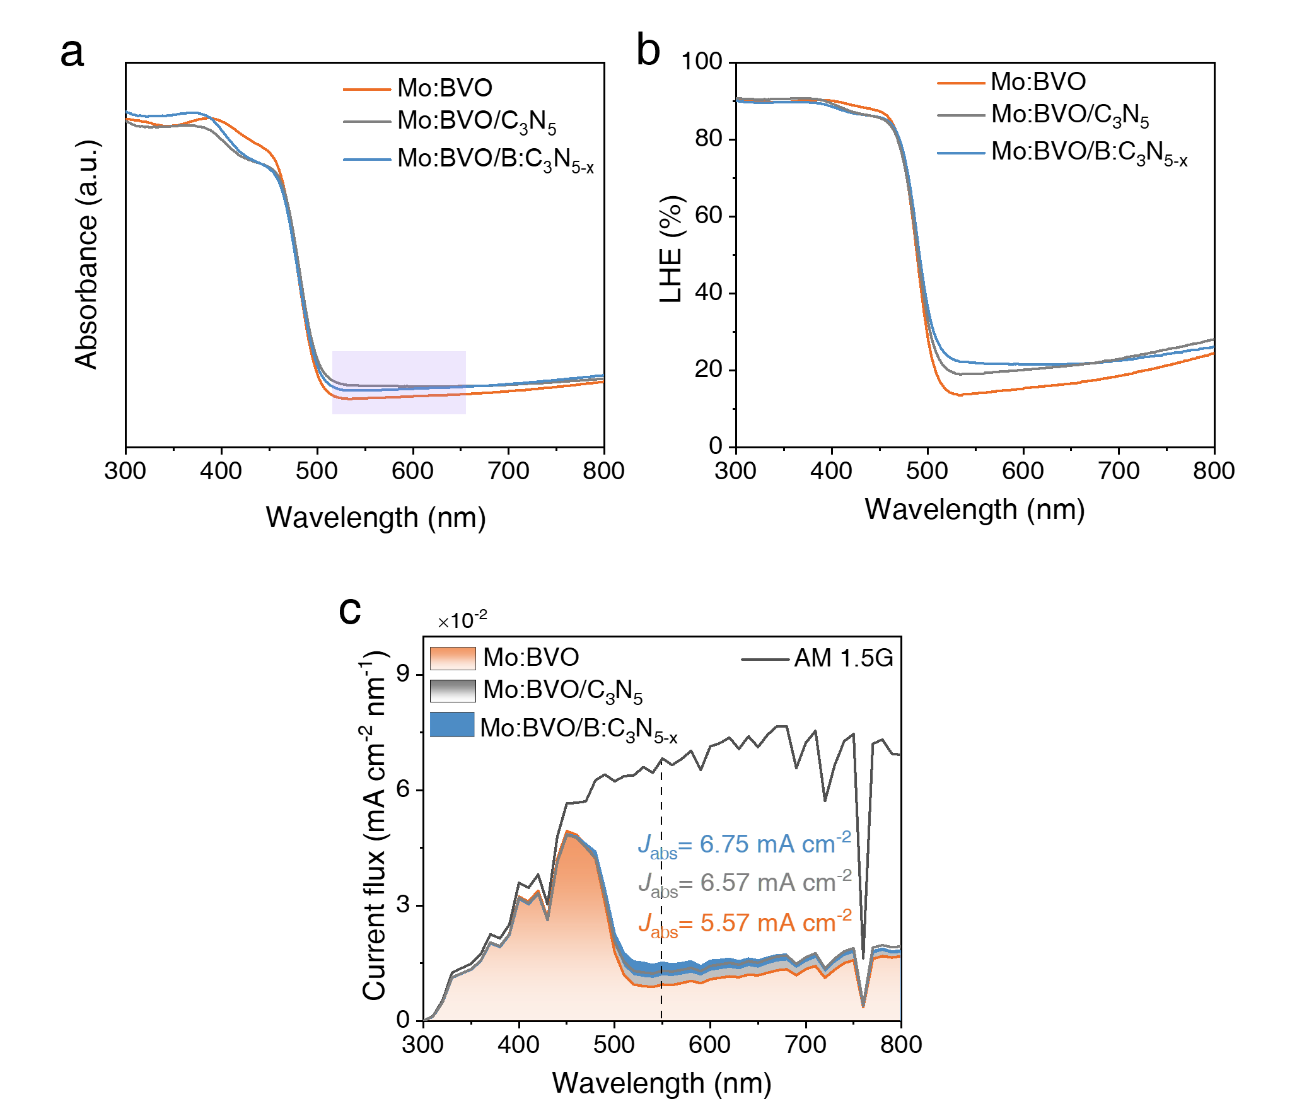


**Supplementary Fig. 19. Optical properties of three samples. a,** UV-visible DRS ofMo:BVO, Mo:BVO/C3N5 and Mo:BVO/B:C3N5-x. **b**, Light harvesting efficiency (LHE) of Mo:BVO, Mo:BVO/C3N5 and Mo:BVO/B:C3N5-x. **c**, Spectra of the solar irradiance of AM 1.5 G and those weighted by Figure b. The loading of C3N5 and B:C3N5-x significantly enhance the light absorption capacity in the visible light region (Benefiting from the absorption capacity of C3N5 and B:C3N5-x nanosheets in the visible light region). Light harvesting efficiency (LHE) can be expressed as: LHE = 1-10-A, which is derived from **a**. This significant increase in visible light absorption can substantially enhance its *J*abs (from 5.57 mA cm-2 to 6.75 mA cm-2), giving it the potential to achieve higher photocurrent densities. Photocurrent assuming 100% absorbed photon-to-current efficiency *J*abs can be expressed as follow equation:

whereis the solar irradiance, e is the electron charge, is the Planck constant, is the speed of light, A is the absorbance. The electron-hole separation yield (*Φ*sep) can be expressed as: *Φ*sep = *J*HS/*J*abs, where *J*HS is the photocurrent density of samples with Na2SO3 hole scavenger.


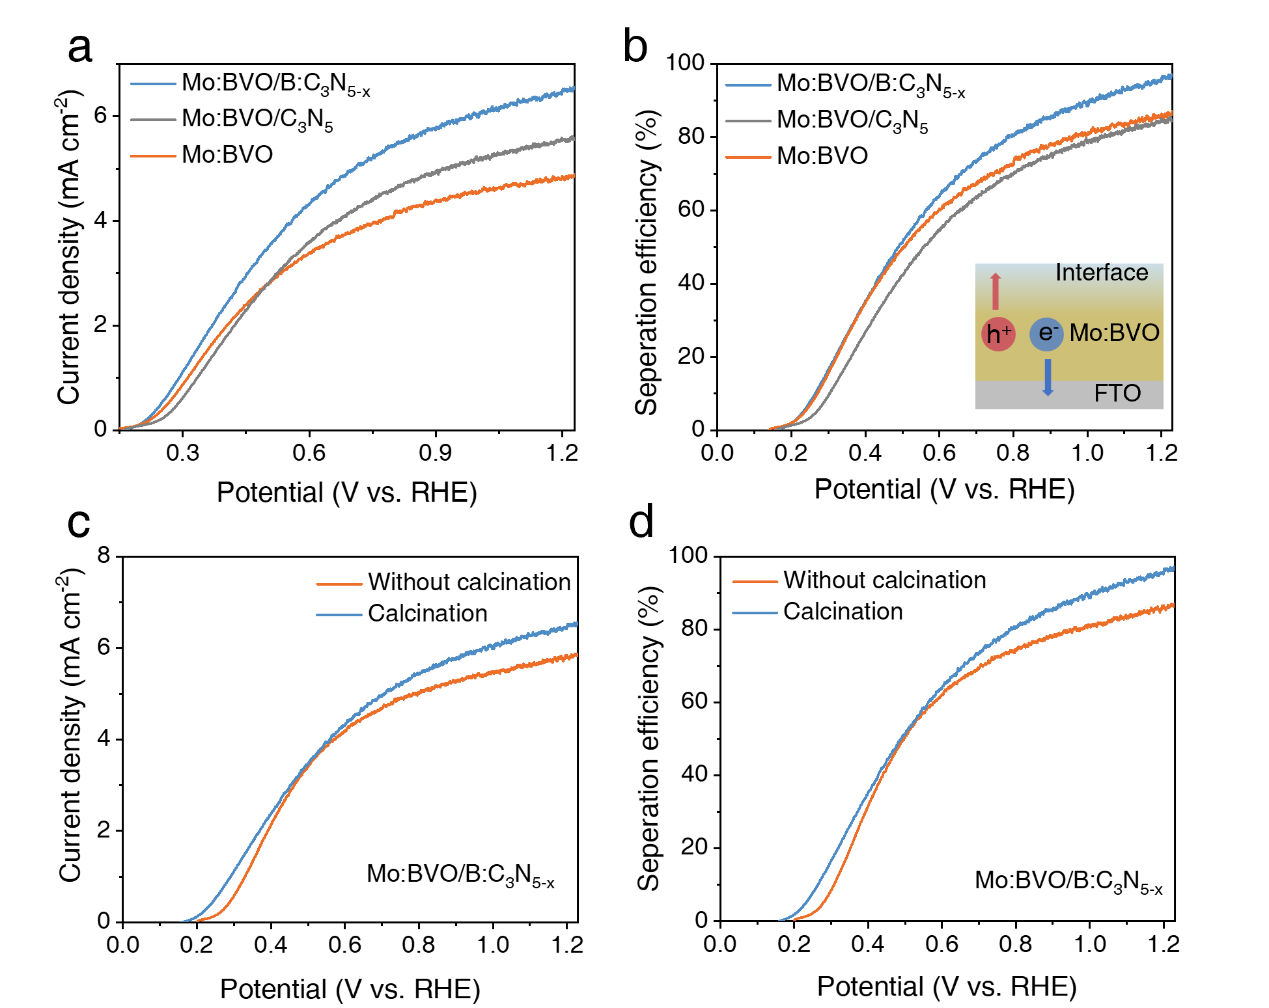


**Supplementary Fig. 20. PEC performance containing Na2SO3. a**, LSV curves of Mo:BVO, Mo:BVO/C3N5 and Mo:BVO/B:C3N5-x photoanodes under AM 1.5G simulated light with 0.2 M Na2SO3 as a hole scavenger. **b**, the *Φ*sep of Mo:BVO, Mo:BVO/C3N5 and Mo:BVO/B:C3N5-x. photoanodes. **c**, LSV curves of Mo:BVO/C3N5 photoanodes with/without calcination under AM 1.5G simulated light with 0.2 M Na2SO3 as a hole scavenger. **d**, the *Φ*sep of Mo:BVO/B:C3N5-x photoanodes with/without calcination.


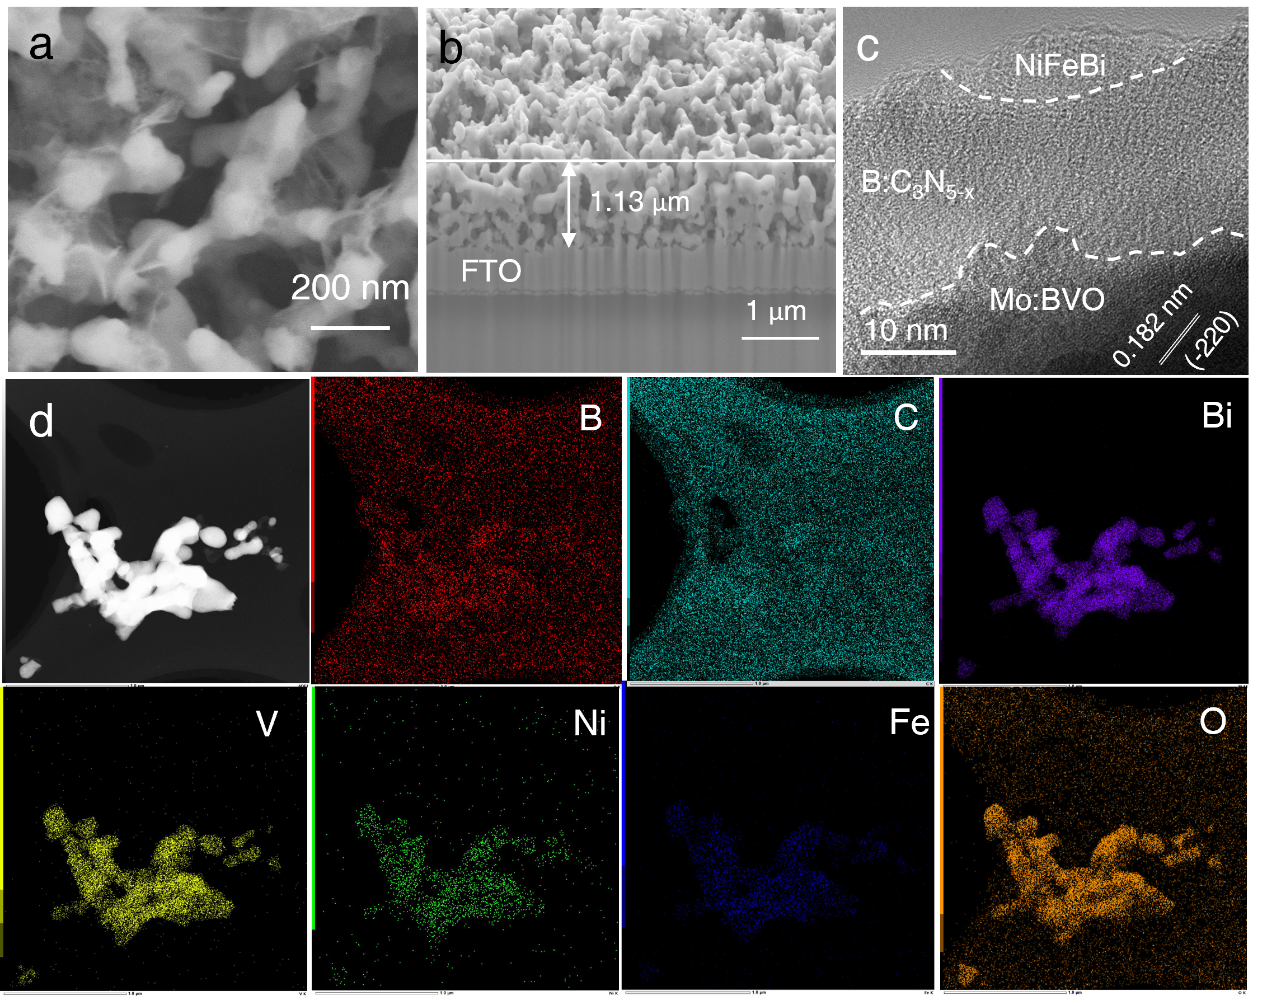


**Supplementary Fig. 21. Structure characterization of Mo:BVO/B:C3N5-x/NiFeBi. a,** TOP-viewSEM image of Mo:BVO/B:C3N5-x/NiFeBi. **b**, cross-section SEM image Mo:BVO/B:C3N5-x/NiFeBi. **c**, TEM image of Mo:BVO/B:C3N5-x/NiFeBi. **d**, STEM image of Mo:BVO/B:C3N5-x/NiFeBi and EDX mapping images for B, C, Bi, V, Ni, Fe and O, respectively.

**Supplementary Fig. 22.** XRD pattern of Mo:BVO/B:C3N5-x/NiFeBi.


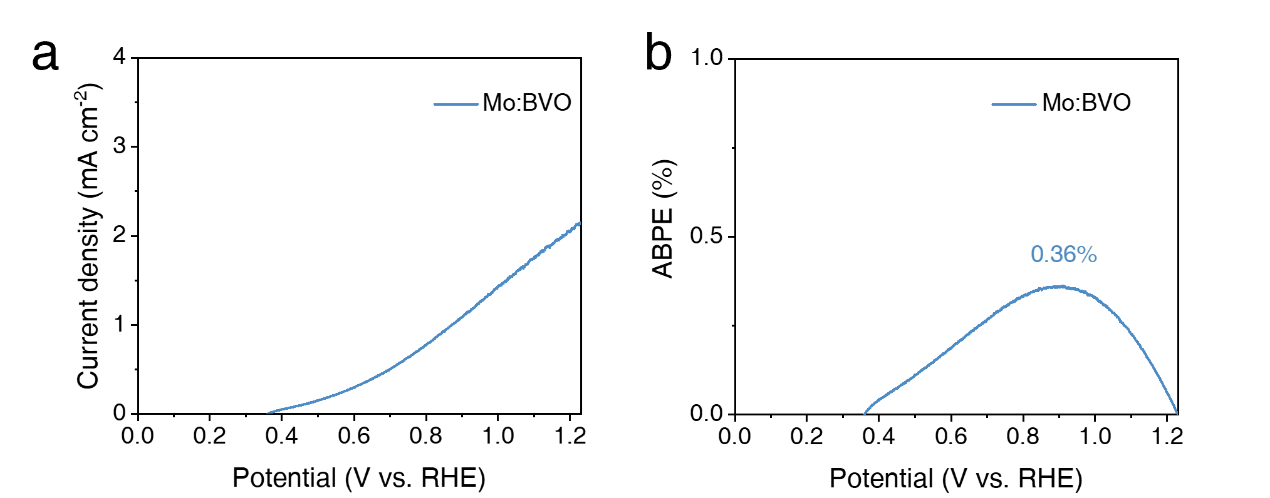


**Supplementary Fig. 23. a**,LSV curve of the Mo:BVO photoanode recorded at a scan rate of 50 mV s−1 in 0.5 M KBi solution. **b**, ABPE curve.

**Supplementary Fig. 24. PEC water oxidation of photoanodes.** *Φ*OX of Mo:BVO, Mo:BVO/NiFeBi,Mo:BVO/C3N5/NiFeBi and Mo:BVO/B:C3N5-x/NiFeBi photoanodes. *Φ*OX= *J*PEC/*J*HS where *J*PEC is photocurrent density measured in 0.5 M KBi solution, and *J*HS is photocurrent density measured in 0.5 M KBi solution with 0.2 M Na2SO3. The value of the *Φ*OX reflects the ability of PEC water oxidation.

**Supplementary Fig. 25. ABPE values compared to recent work**. Comparison of ABPE values of the Mo:BVO/B:C3N5-x/NiFeBi photoanode with the previously reported BVO-based photoanodes. The photoanode we fabricated achieved an ABPE value of 2.89%, representing the highest level currently known in operation. This demonstrates the superiority of our dual-electric-field strategy for promoting charge carrier separation under low bias conditions.


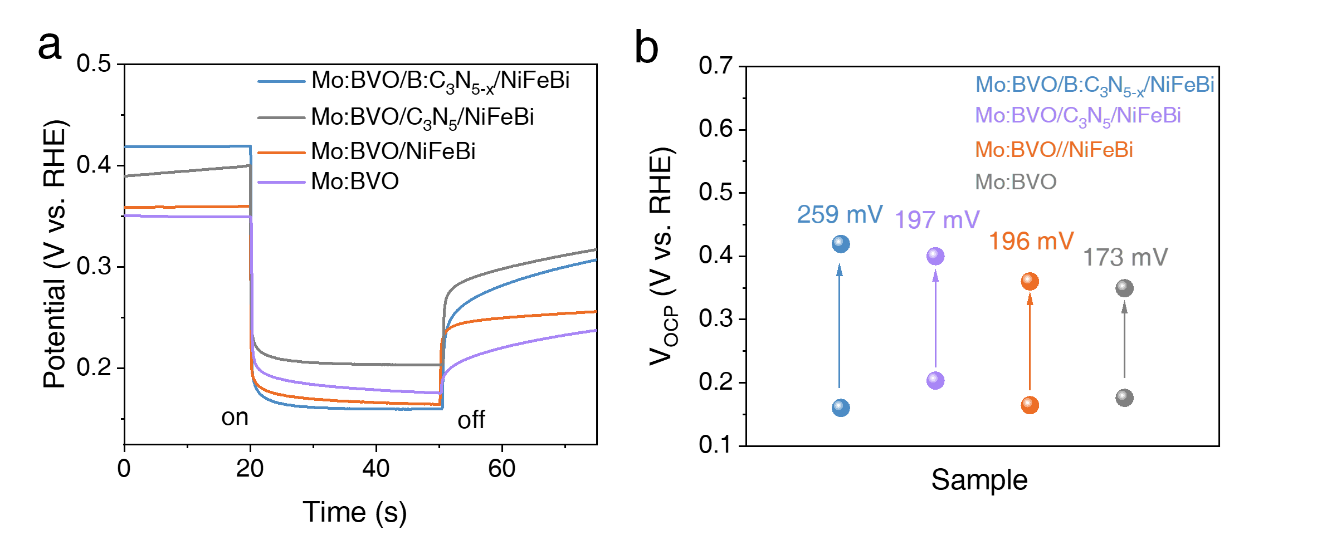


**Supplementary Fig. 26.** **OCP spectra of BVO-based photoanodes with hole scavenger.** **a**, OCP spectra of Mo:BVO, Mo:BVO/NiFeBi,Mo:BVO/C3N5/NiFeBi and Mo:BVO/B:C3N5-x/NiFeBi photoanodes with hole scavenger. in KBi solution with the Na2SO3 hole scavenger (pH = 9.5) after testing 75 s. **b**, OCP values of four samples.


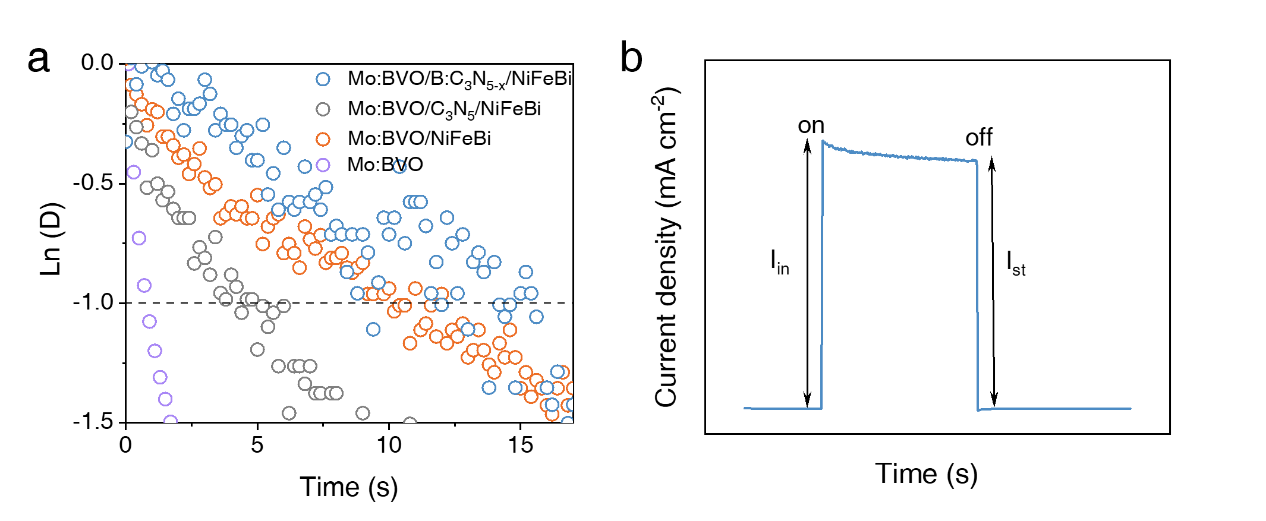


**Supplementary Fig. 27. a,** Transient time constant of photogenerated carriers of Mo:BVO, Mo:BVO/NiFeBi,Mo:BVO/C3N5/NiFeBi and Mo:BVO/B:C3N5-x/NiFeBi photoanodes. **b**, Definition of *Iin* and *Ist.*

D = exp=

D (normalized parameter), the time corresponding to LnD = -1 is defined as the transient time constant (), where *It, Iin* and *Ist* are the photocurrent at t, initial state, and steady state, respectively.


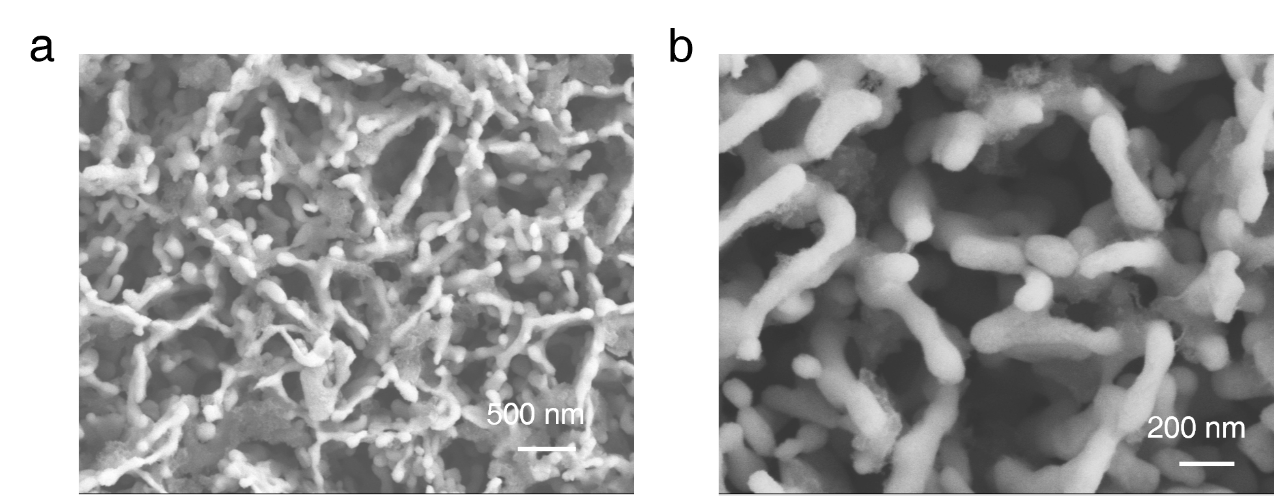


**Supplementary Fig. 28. Morphology property. a-b,** SEM images of Mo:BVO/B:C3N5-x/NiFeBi photoanode after i-t test.


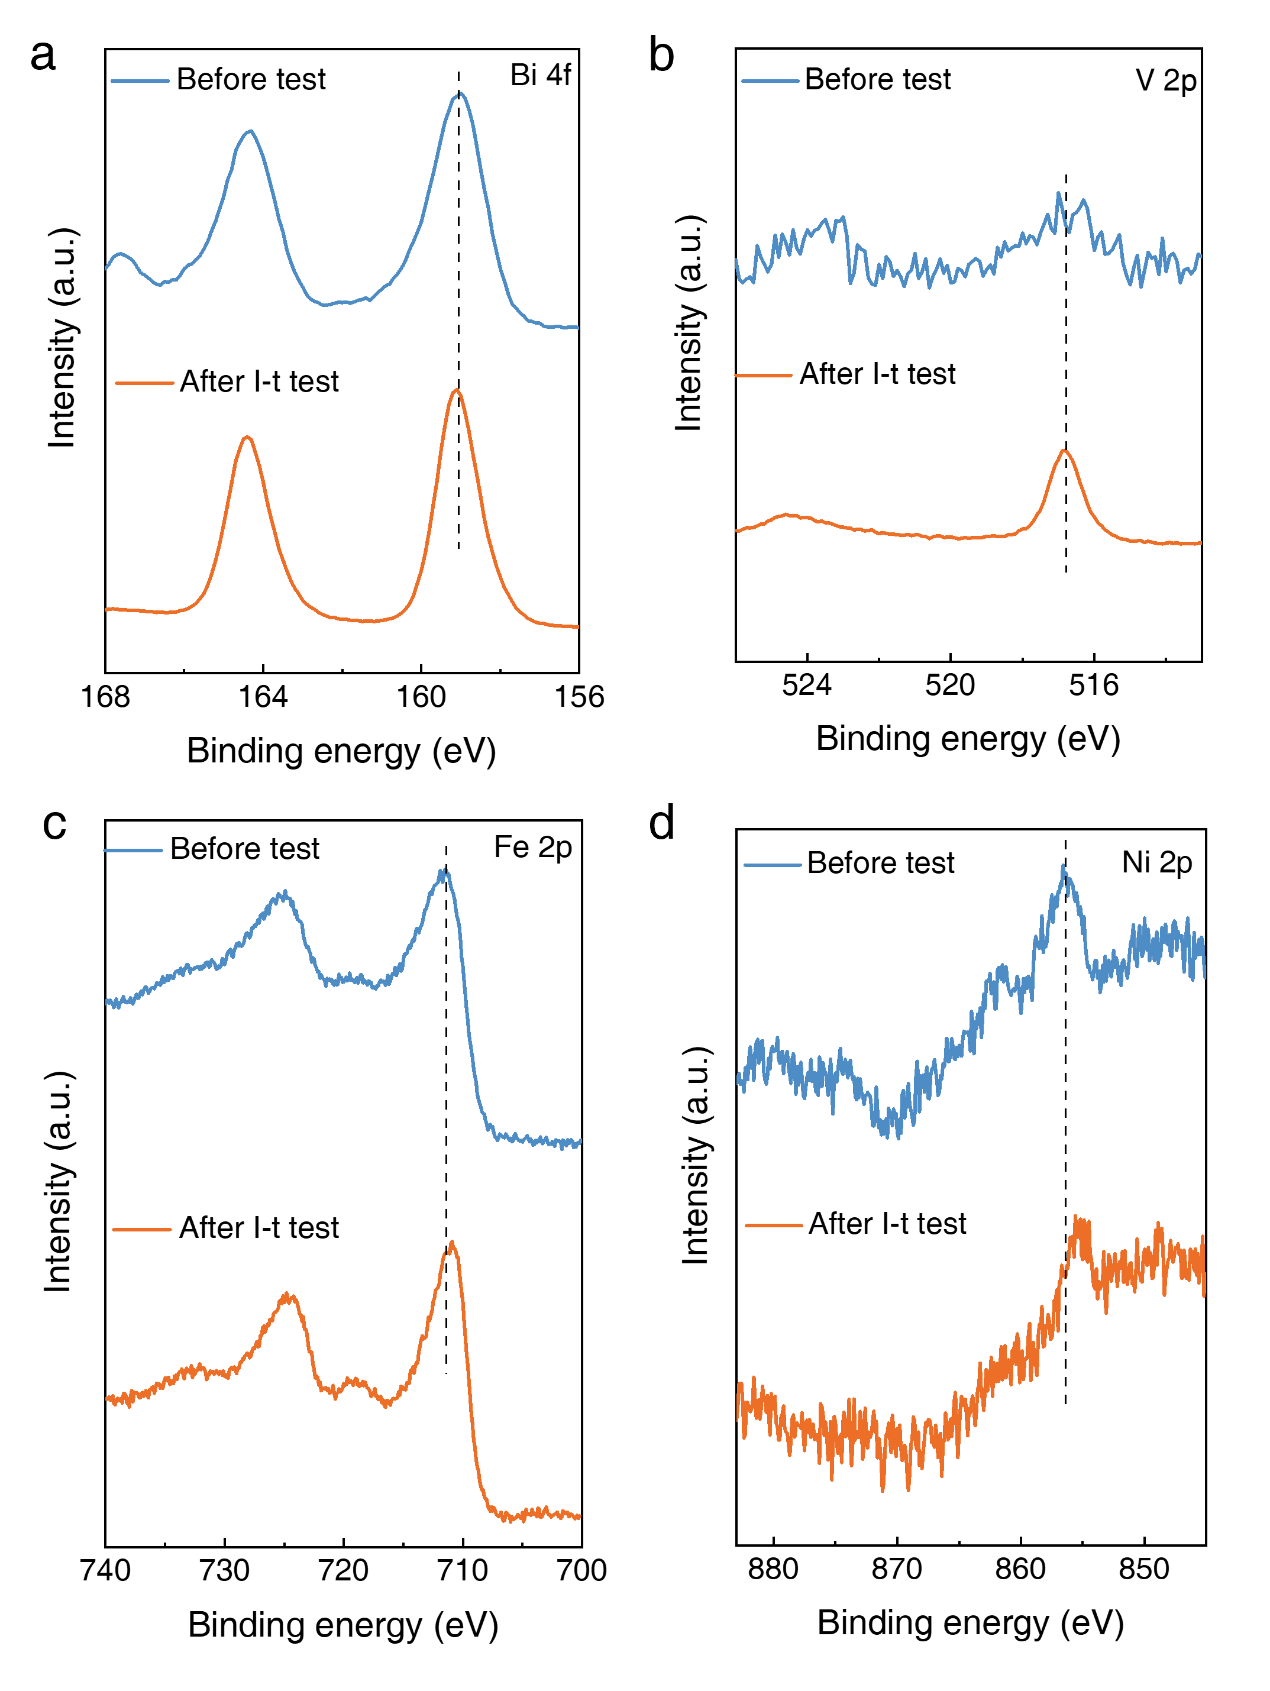


**Supplementary Fig. 29. Electronic structure changes after stability testing characterized by XPS.** XPS spectra of **a**, Bi 4f, **b**, V 2p, **c**, Fe 2p and **d**, Ni 2p of Mo:BVO/B:C3N5-x/NiFeBi before and after 45 h test.


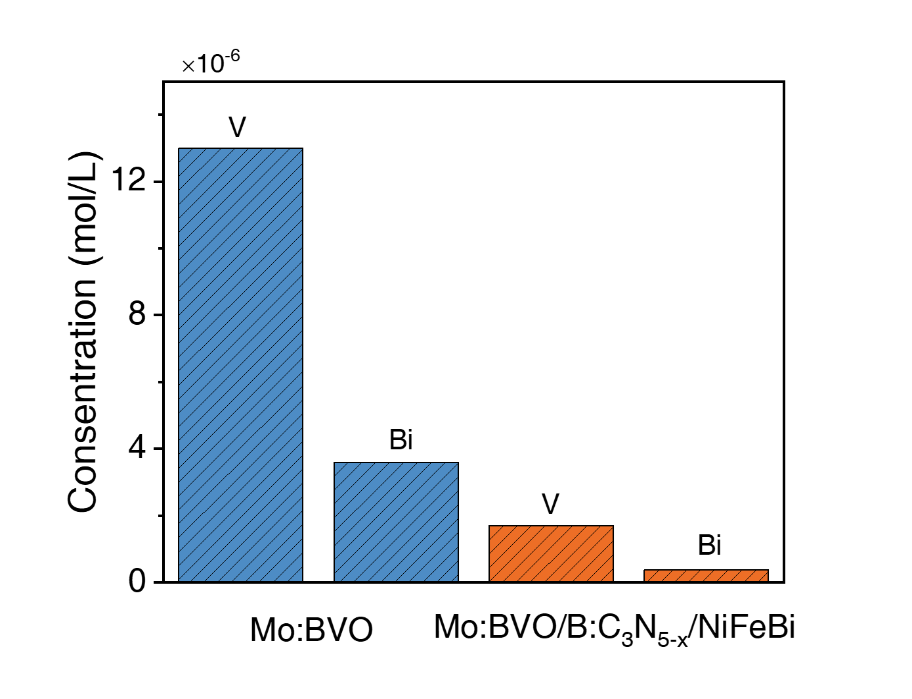


**Supplementary Fig. 30.** **Ion content in electrolyte after stability test.** ICP-OES bar chart of Bi and V concentration for Mo:BVO and Mo:BVO/B:C3N5-x/NiFeBi.


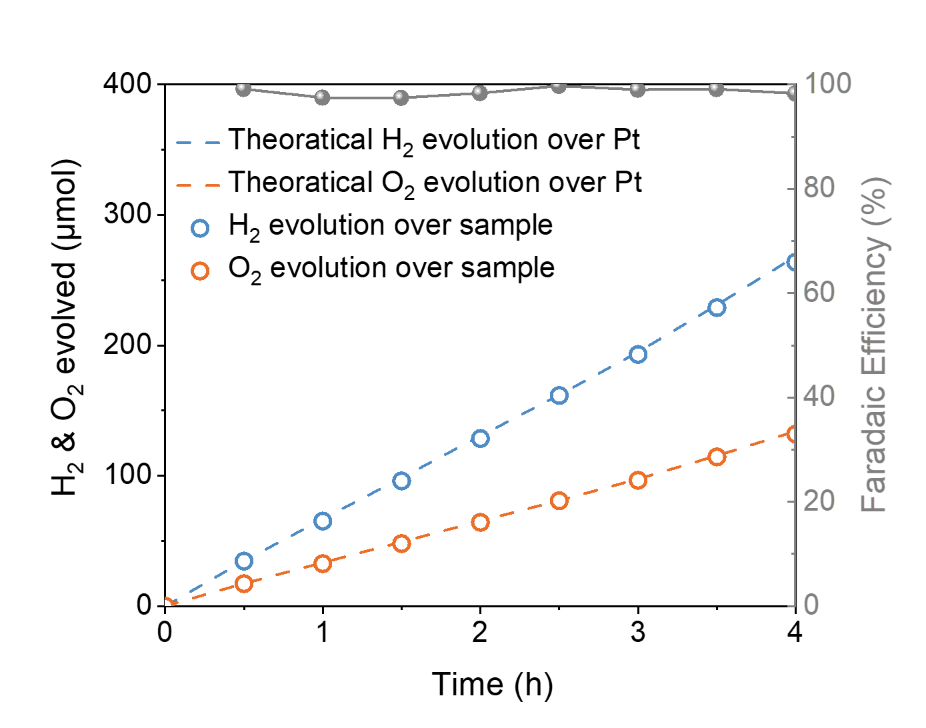


**Supplementary Fig. 31.** **Faraday efficiency test.** H2 and O2 evolution of the Mo:BVO/B:C3N5-x/NiFeOx photoanode at 1.23 VRHE.


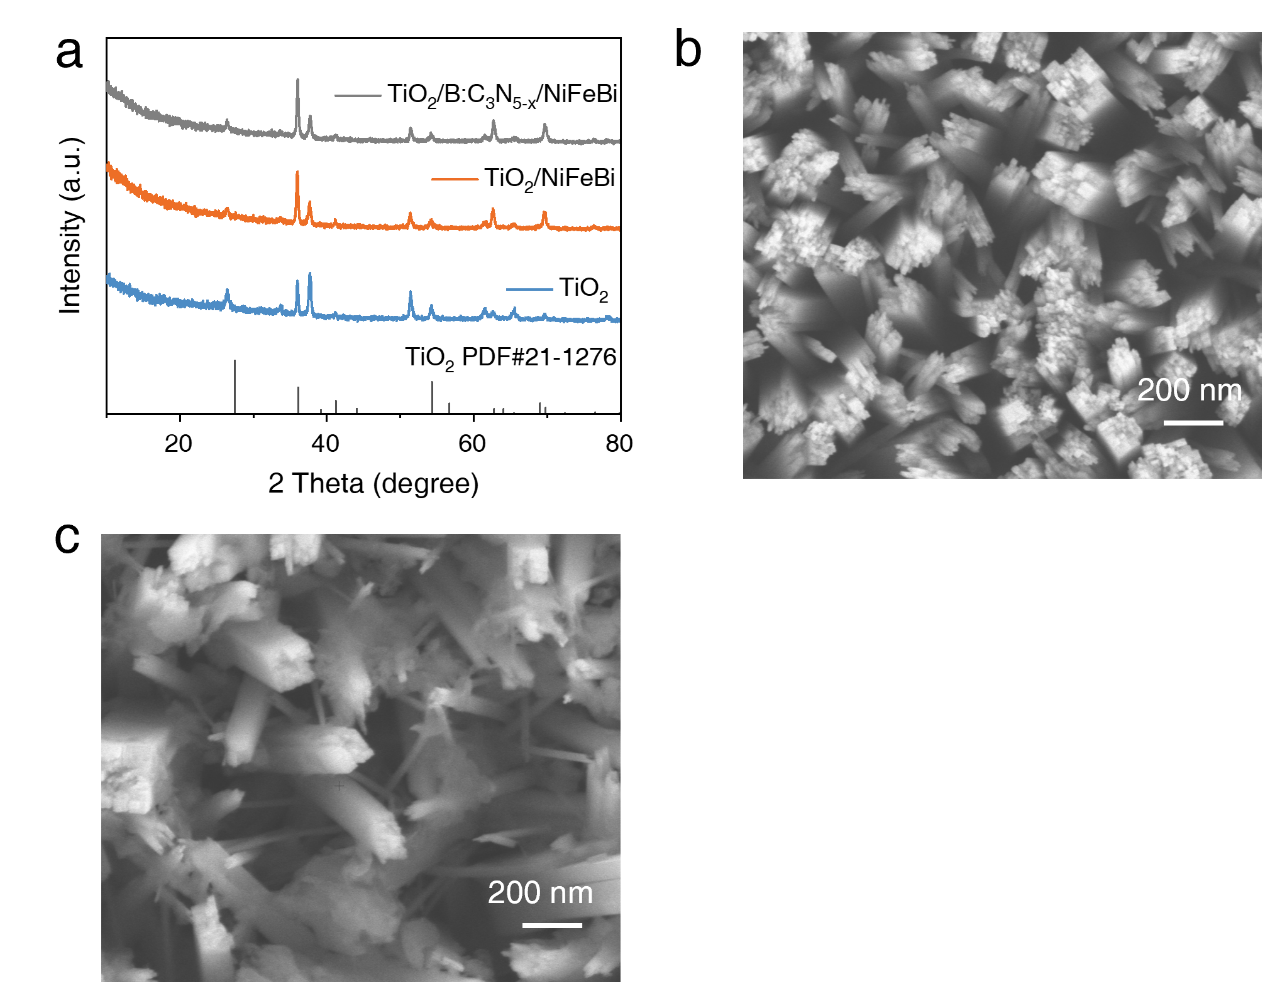


**Supplementary Fig. 32. Structural properties of photoanodes. a,** XRD pattern of TiO2, TiO2/NiFeBi and TiO2/B:C3N5-x/NiFeBi photoanodes. **b**, SEM image of TiO2. **c**, SEM image of TiO2/ B:C3N5-x/NiFeBi.


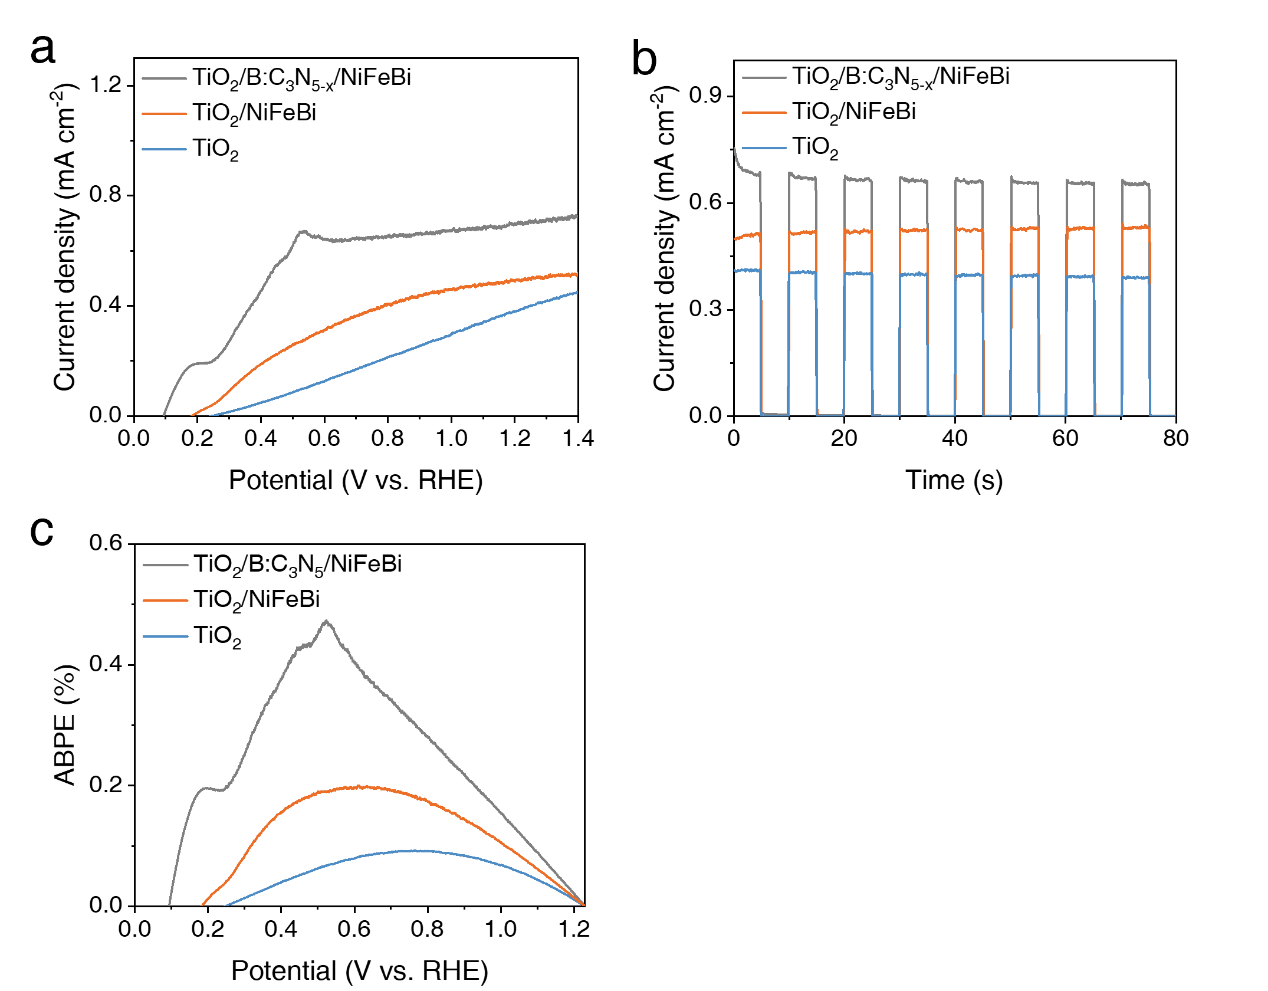


**Supplementary Fig. 33. PEC performance. a** LSV curves of the TiO2, TiO2/NiFeBi and TiO2/B:C3N5-x/NiFeBi photoanodes recorded at a scan rate of 50 mV s-1 in 1 M NaOH solution. **b**, I-t test of TiO2, TiO2/NiFeBi, TiO2/B:C3N5-x/NiFeBi photoanodes switching light. **c**, ABPE curves.


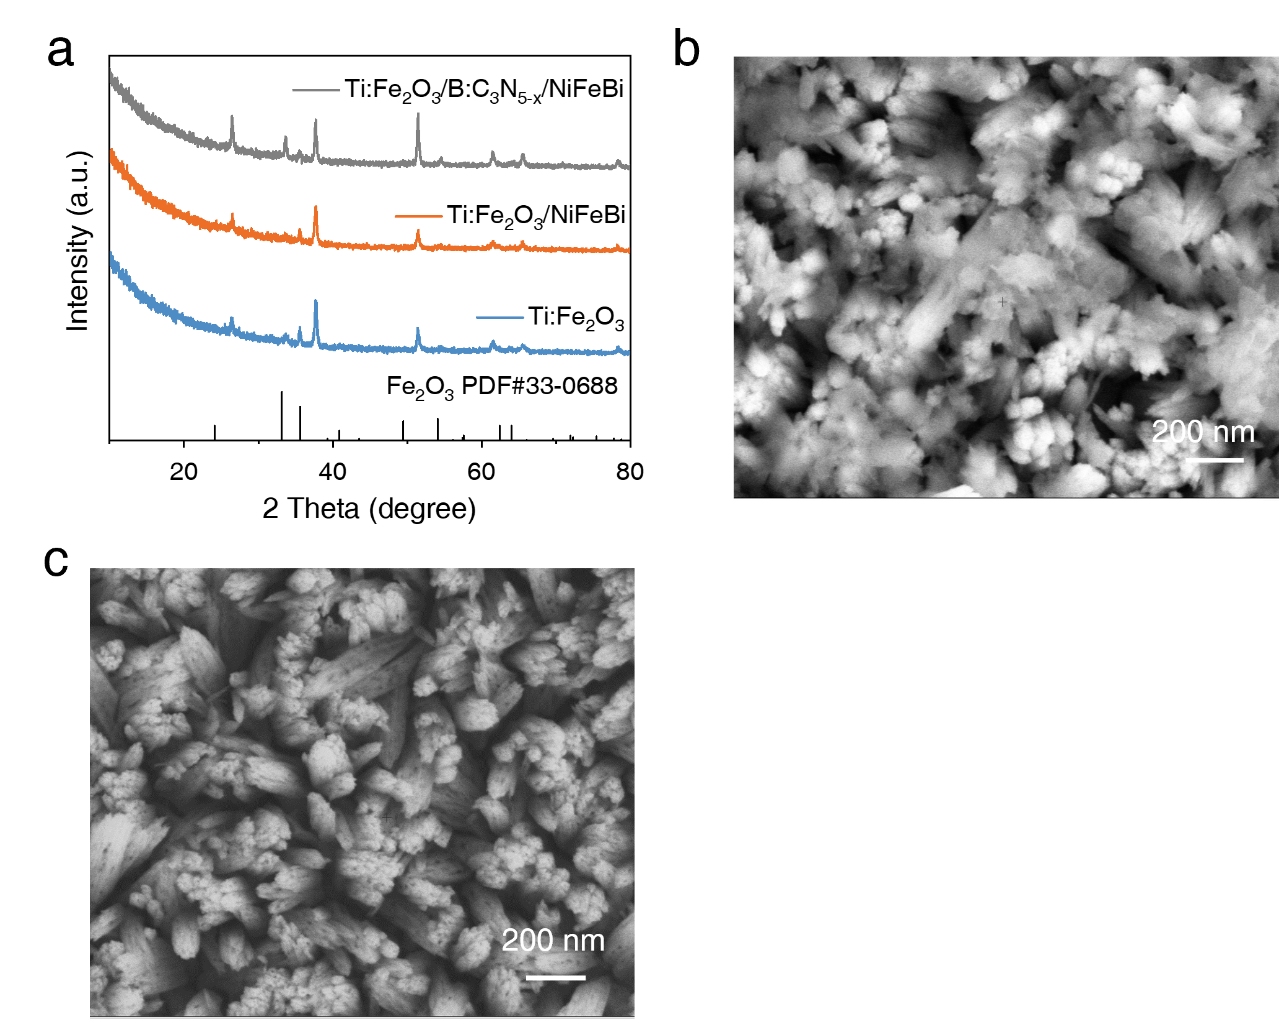


**Supplementary Fig. 34. Structural properties of photoanodes. a,** XRD pattern of Ti:Fe2O3, Ti:Fe2O3/NiFeBi and Ti:Fe2O3/B:C3N5-x/NiFeBi photoanodes. **b**, SEM image of Ti:Fe2O3. **c**, SEM image of Ti:Fe2O3/ B:C3N5-x/NiFeBi.


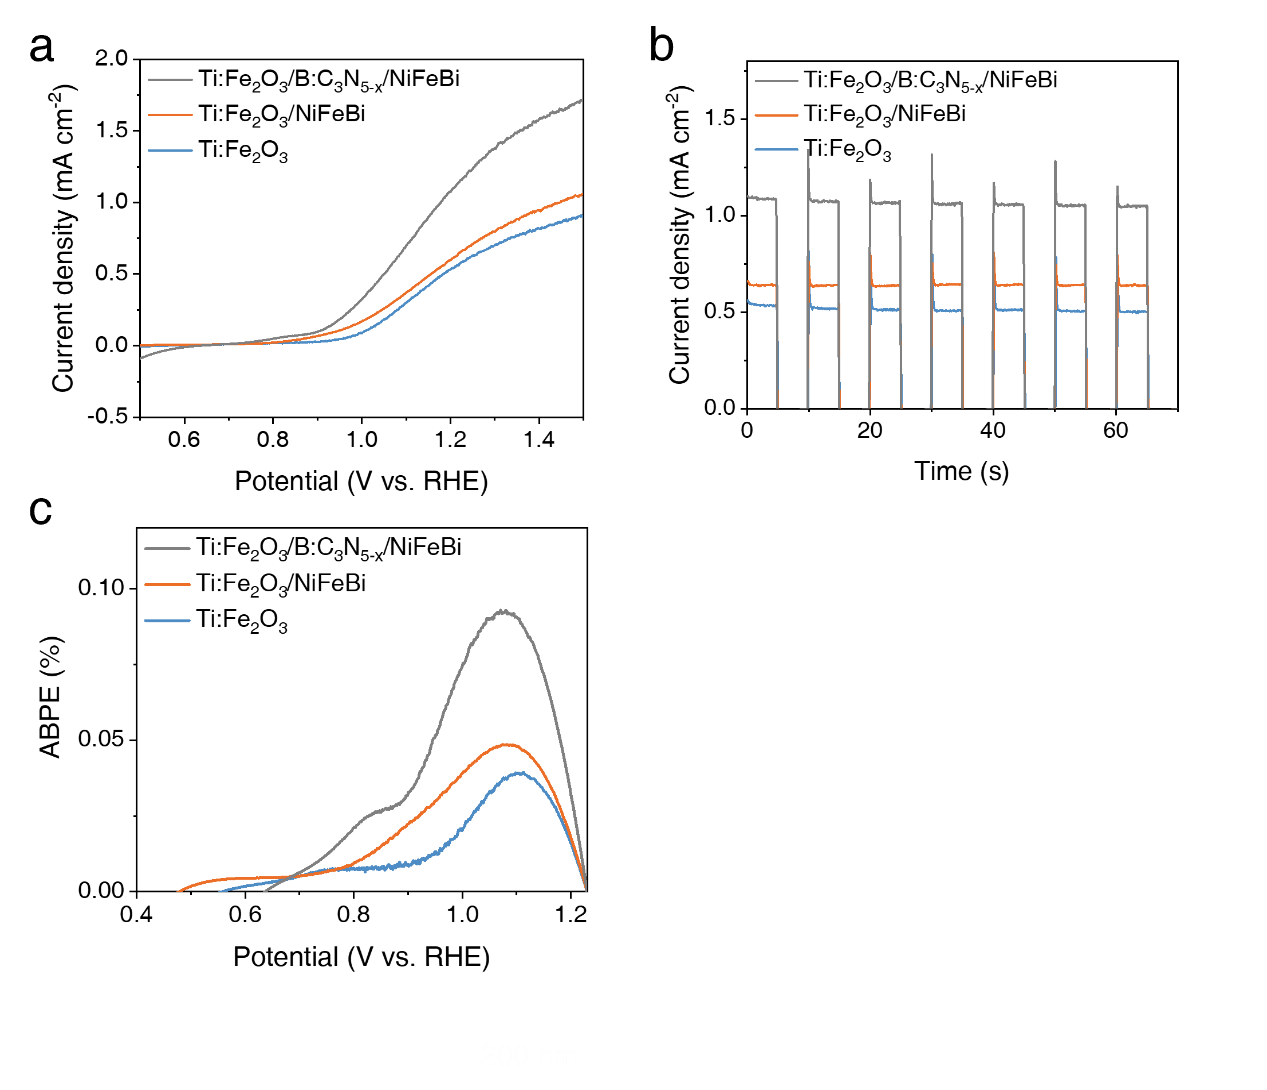


**Supplementary Fig. 35. PEC performance. a** LSV curves of the Ti:Fe2O3, Ti:Fe2O3/NiFeBi and Ti:Fe2O3/B:C3N5-x/NiFeBi photoanodes recorded at a scan rate of 50 mV s-1 in 1 M NaOH solution. **b**, I-t test of Ti:Fe2O3, Ti:Fe2O3/NiFeBi, Ti:Fe2O3/B:C3N5-x/NiFeBi photoanodes switching light. **c**, ABPE curves.

**Supplementary Fig. 36**. **Optical band gaps**. The plot of transformed Kubelka–Munk function versus the photon energy of Mo: BVO.


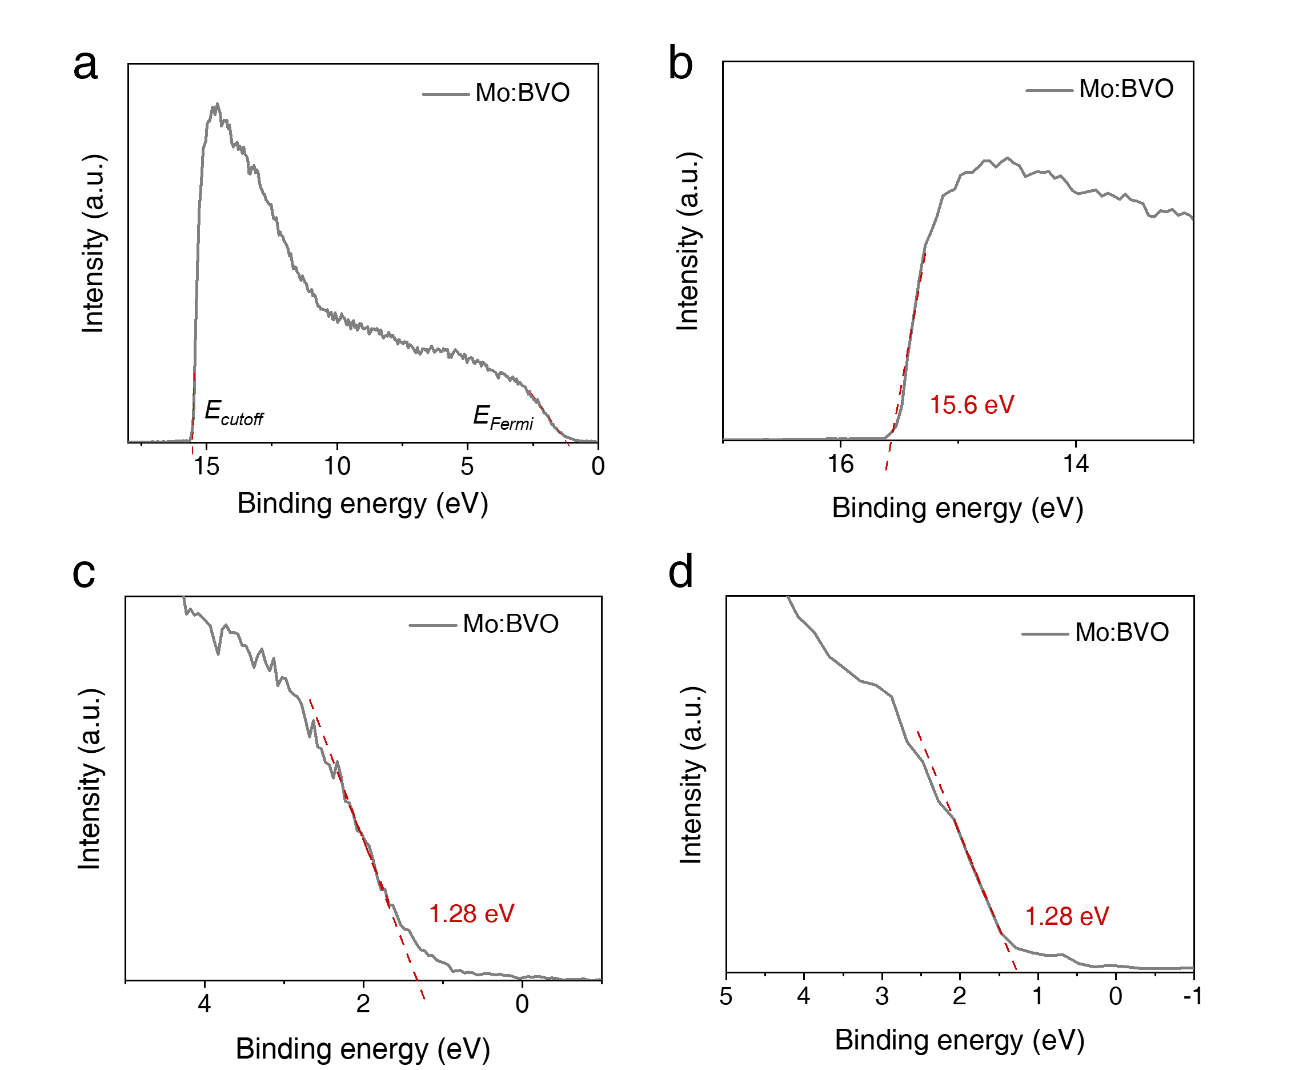


**Supplementary Fig. 37. UPS and XPS valence band spectra. a-c**, UPS and **d**, XPS valence band spectra of Mo:BVO. According to the linear intersection method, the *EVB* of Mo:BVO was calculated to be -6.9 eV (vs. vacuum) from *ECutoff*–*hυ* –*EFermi* (*hυ* of 21.22 eV: the excitation energy of the He I Source Gun). Then the *EVB* of Mo:BVO vs. RHE, was converted to be 2.46 V, on the basis of the relationship between the vacuum energy (*E*vacuum) and the RHE potential (*E*RHE), *E*vacuum = -*E*RHE–4.44 eV. Finally, the *EF*of Mo:BVO was calculated to be 1.18 VRHE, on the basis of the formula *EF* = *EVB- EFermi.* XPS valence band spectra is used to correct *EFermi.*


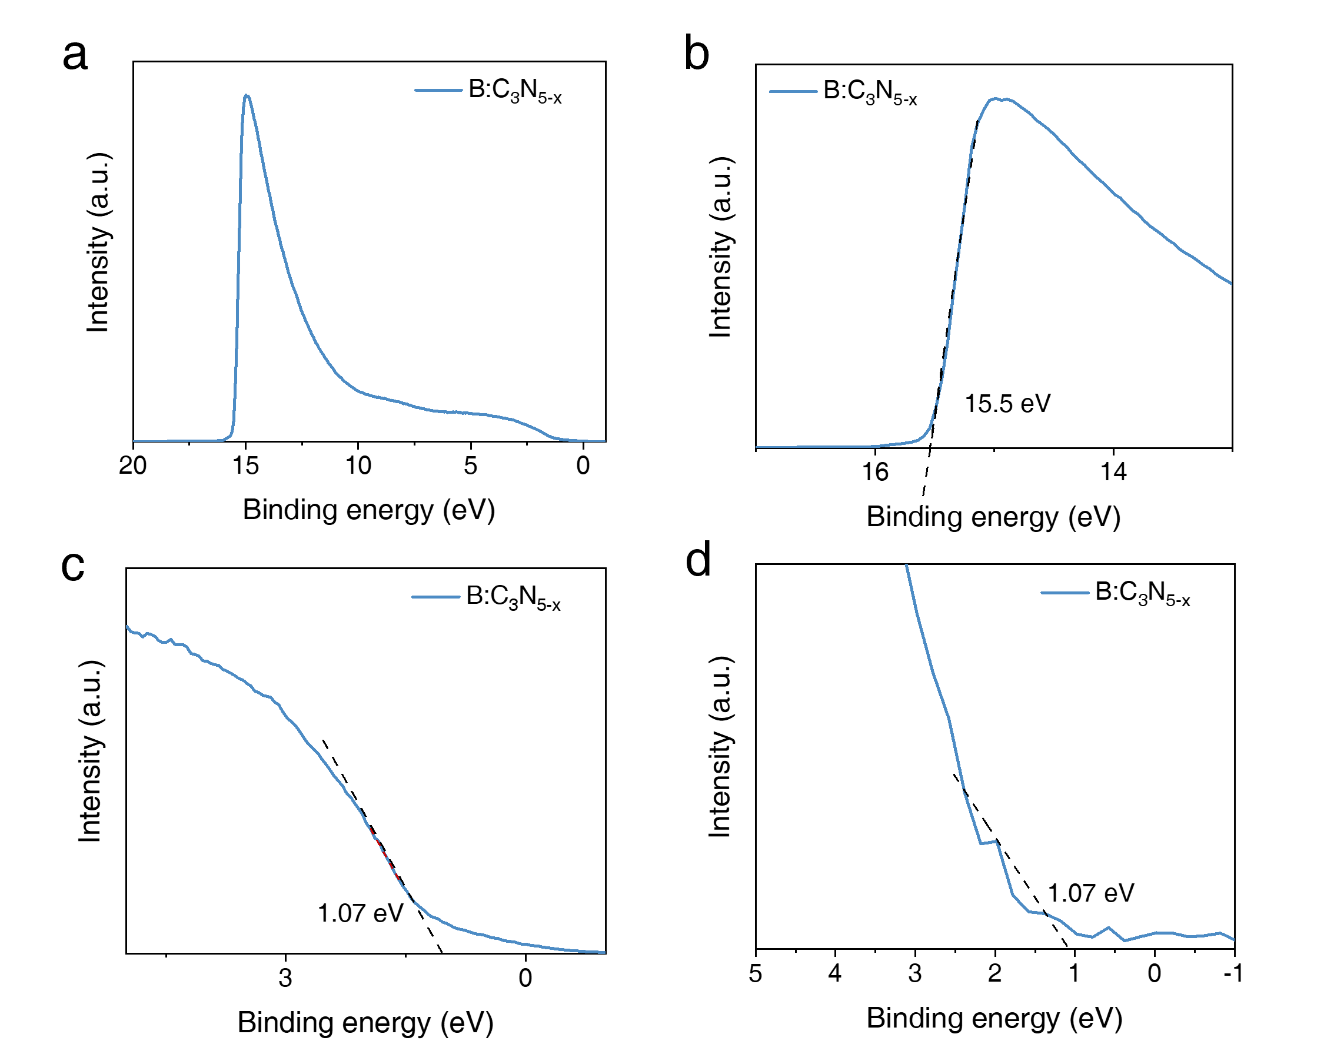


**Supplementary Fig. 38. UPS and XPS valence band spectra. a-c**, UPS and **d**, XPS valence band spectra of B:C3N5-x.


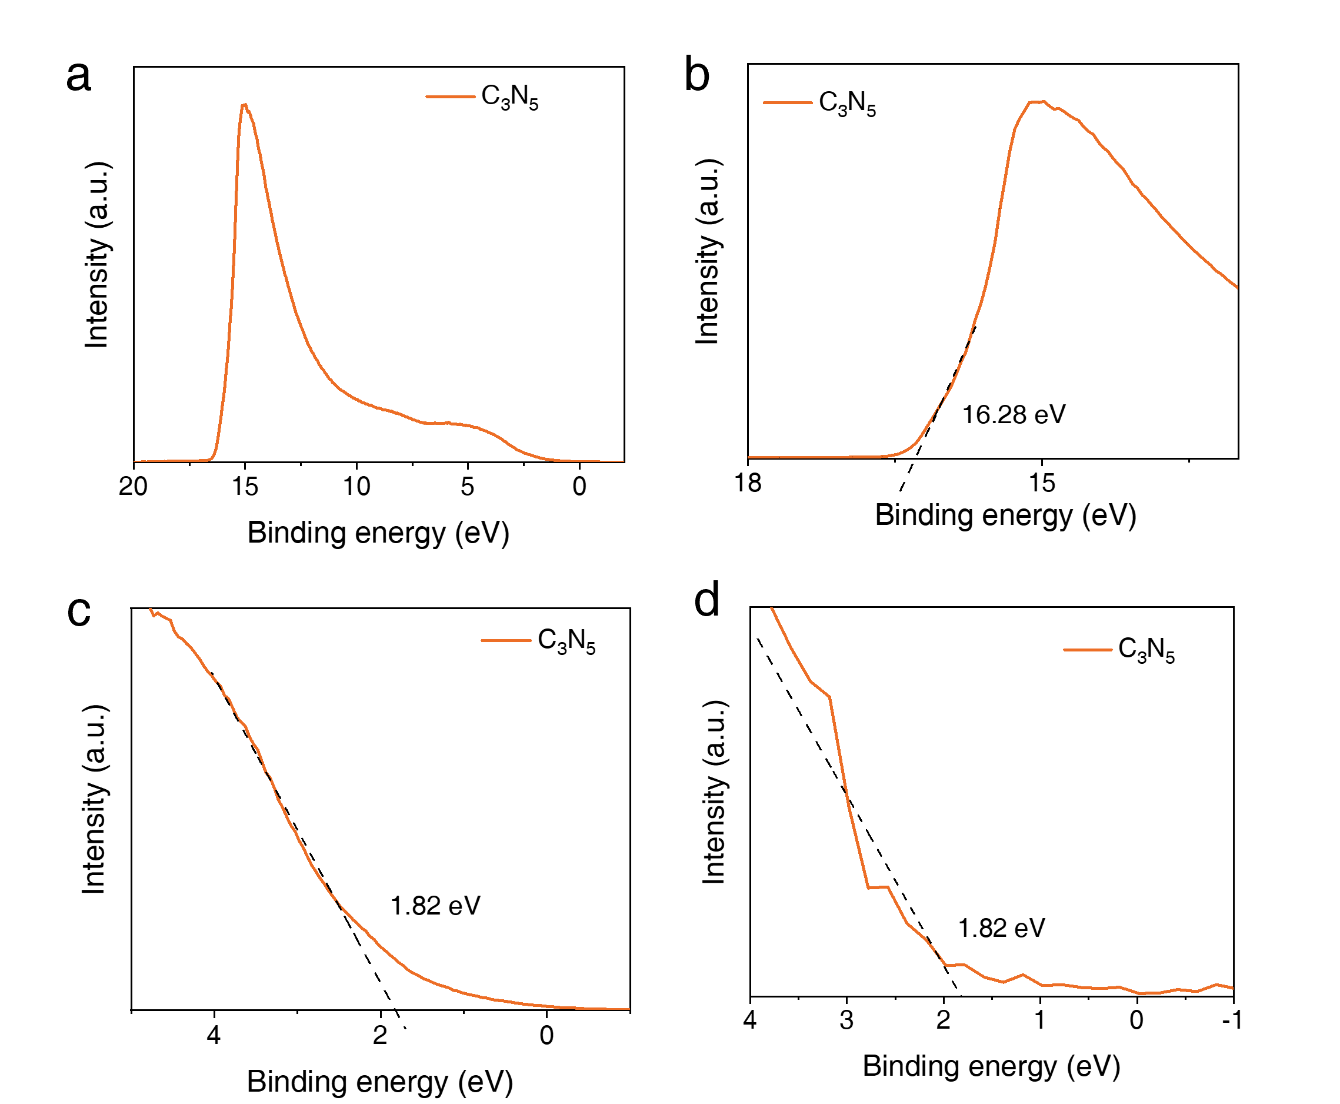


**Supplementary Fig. 39. UPS and XPS valence band spectra. a-c**, UPS and **d**, XPS valence band spectra of C3N5.


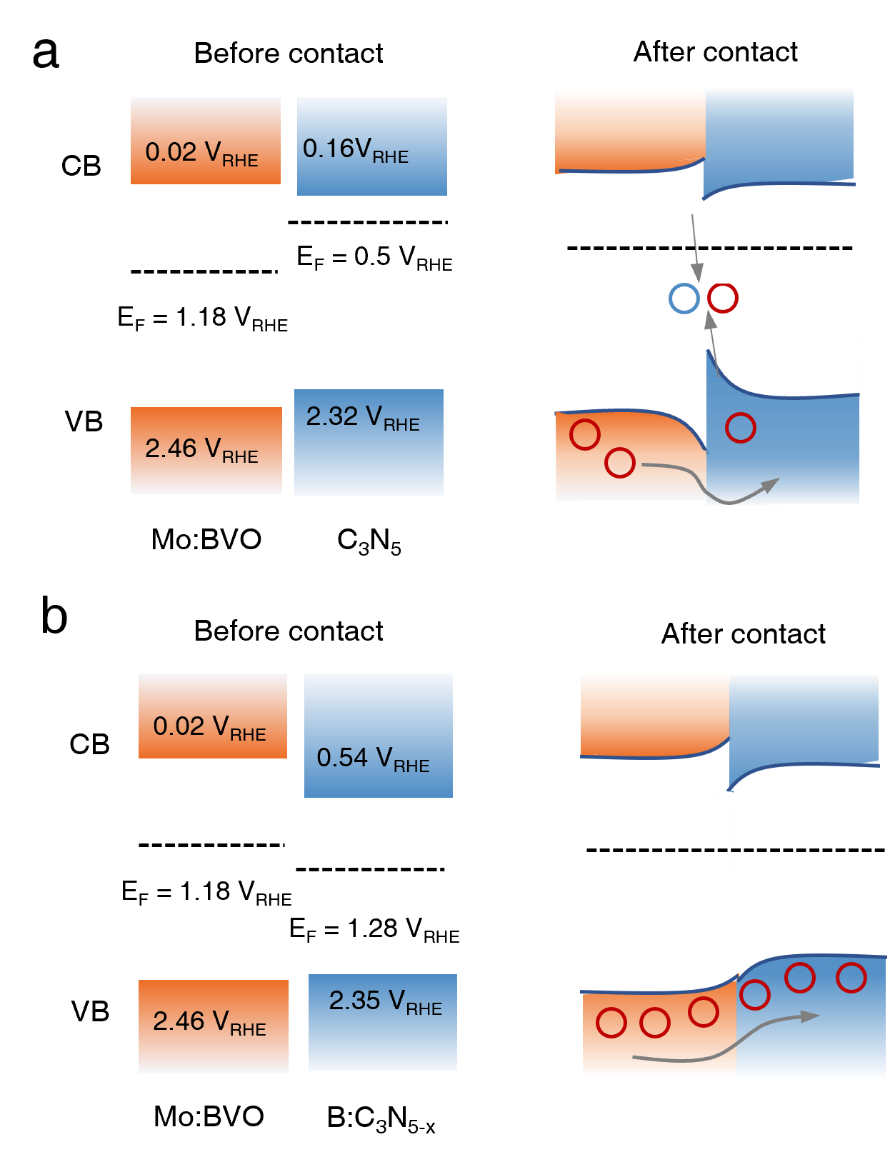


**Supplementary Fig. 40. Band structure.** Before and after contact of band structure. Due to the relatively high Fermi level of C3N5, when it contacts Mo:BVO, the valence band maximum (VBM) of Mo:BVO bends downwards, while the VBM on the C3N5 side bends upwards. This unfavorable band bending creates a significant energy barrier at the interface, impeding carrier transport. However, after introducing B doping and N vacancies, its Fermi level is significantly lowered and falls below that of Mo:BVO. Upon contact with Mo:BVO, a built-in electric field pointing from Mo:BVO towards B:C3N5-x is formed, resulting in favorable band bending.


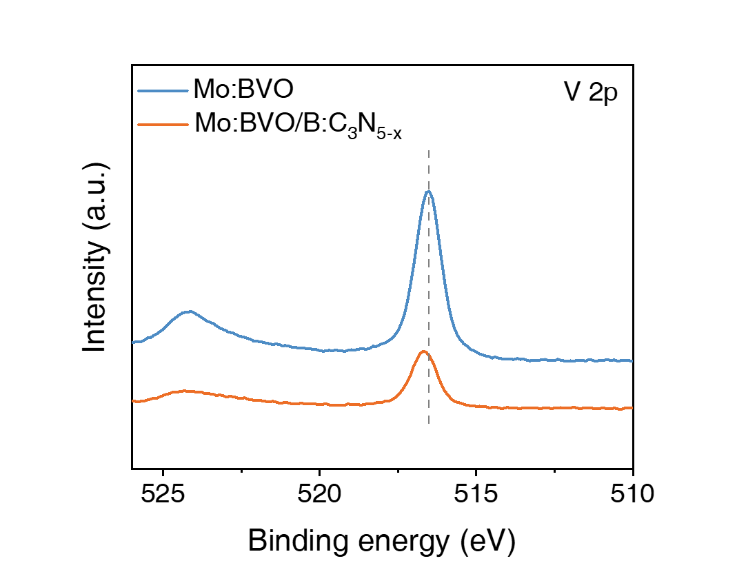


**Supplementary Fig. 41. Characterization of electronic structure.** XPS spectra of V 2p 4f of Mo:BVO and Mo:BVO/B:C3N5-x.

**
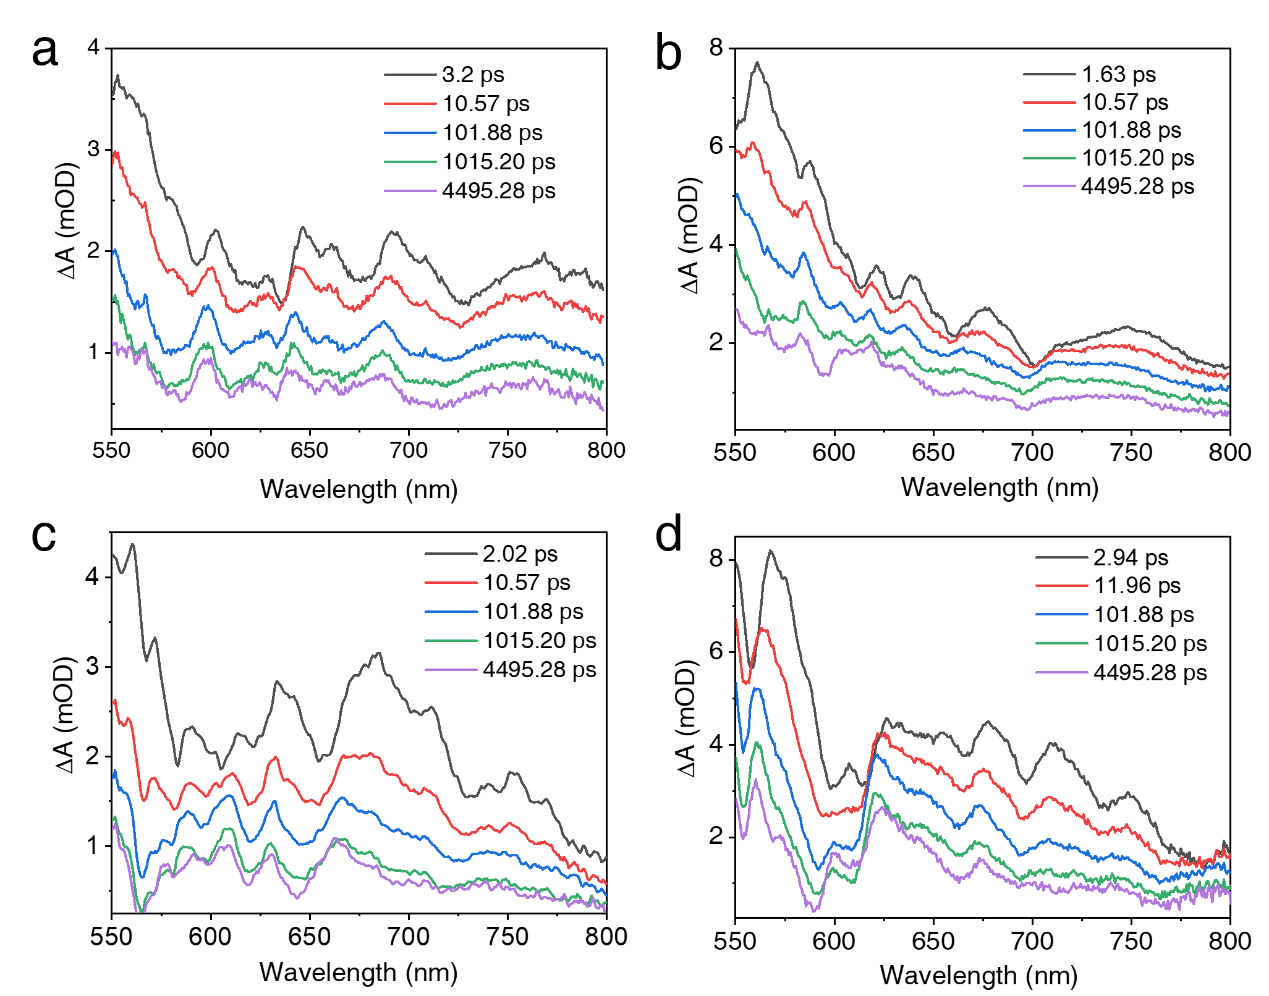
Supplementary Fig. 42. Transient Spectroscopy variation over time.** TA spectra measured after pulsed 400 nm excitation of **a**, Mo:BVO. **b**, Mo:BVO/NiFeBi. **c**, BVO/C3N5/NiFeBi. **d**, BVO/B:C3N5-x/NiFeBi.


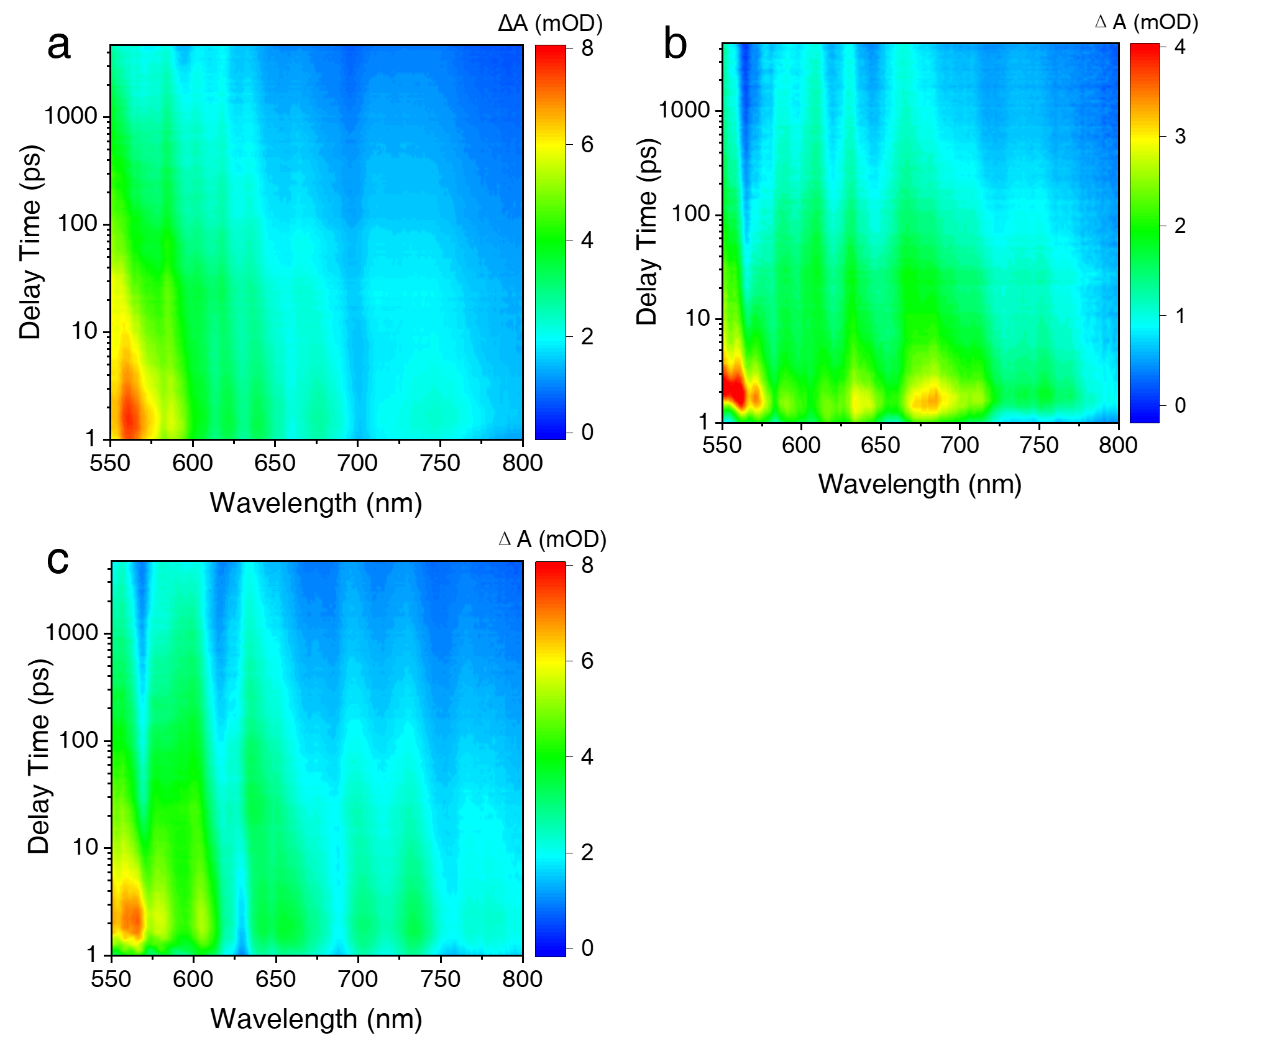


**Supplementary Fig. 43. Pseudocolor map.** Pseudocolor map of the transient absorption spectra of **a**, Mo:BVO. **b**, Mo:BVO/NiFeBi. **c**, Mo:BVO/C3N5/NiFeBi in the ps-ns timescale.


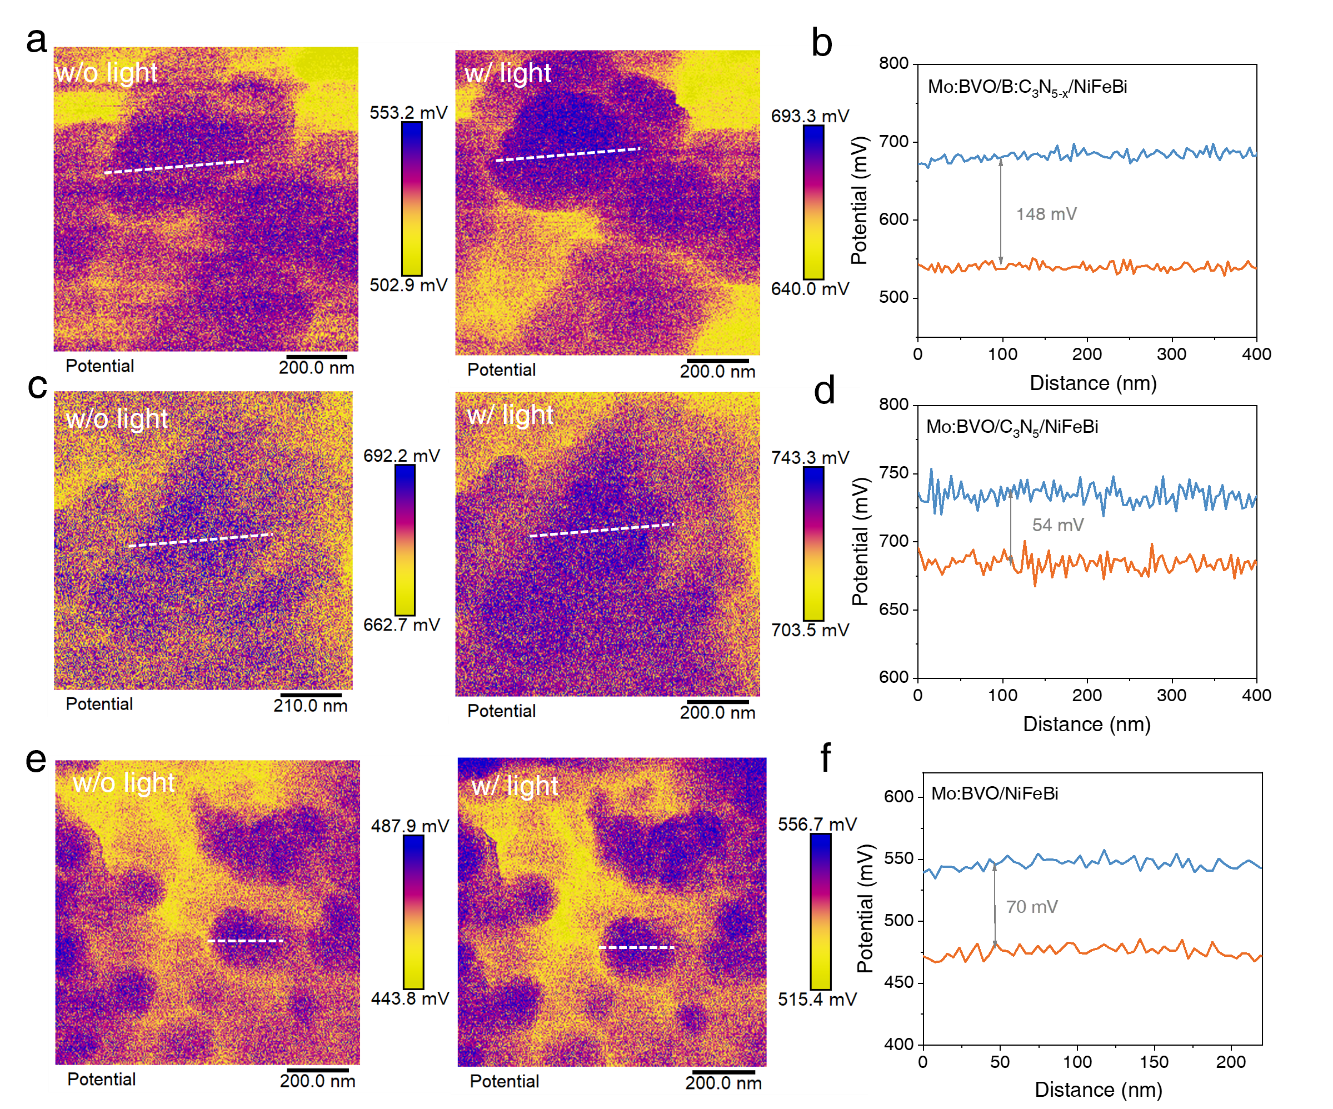


**Supplementary Fig. 44.** **The mechanism of carrier separation. a**, Scanning KPFM images of Mo:BVO/B:C3N5-x/NiFeBi with and without light illumination. **b**, The comparison Mo:BVO/B:C3N5-x/NiFeBi of the line-scanning surface potential with and without light illumination. **c**, Scanning KPFM images of Mo:BVO/C3N5/NiFeBi with and without light illumination. **d**, The comparison Mo:BVO/C3N5/NiFeBi of the line-scanning surface potential with and without light illumination. **e**, Scanning KPFM images of Mo:BVO/NiFeBi with and without light illumination. **f**, The comparison Mo:BVO/NiFeBi of the line-scanning surface potential with and without light illumination.


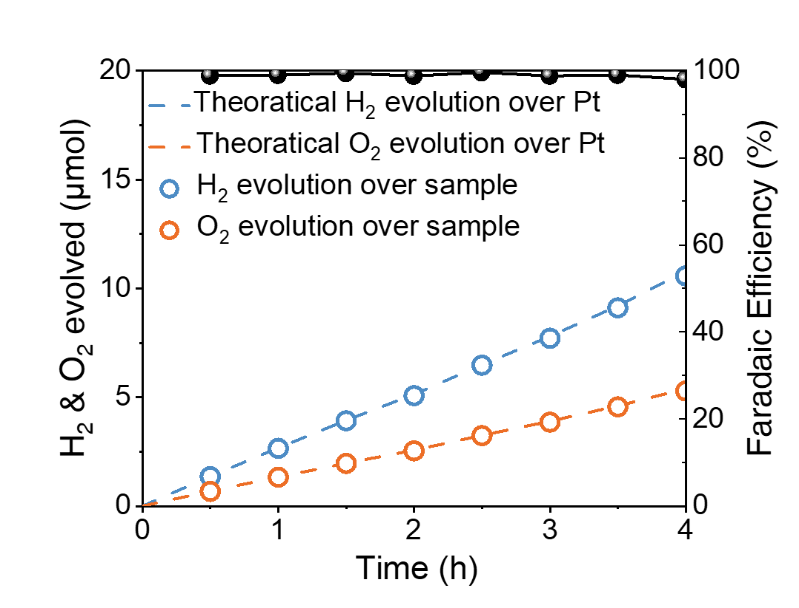


**Supplementary Fig. 45. Faraday efficiency test.** H2 and O2 evolution of the Mo:BVO/B:C3N5-x/NiFeOx photoanode at 1.23 VRHE. The average Faradaic efficiency is approximately 99%. (area: 0.04 cm-2)

**Table S1**. The ABPE by state-of-the-art BVO photoanodes for low-bias PEC water splitting.

| Photoanode | ABPE (%) | Potential (VRHE) | Ref1-13 |
| --- | --- | --- | --- |
| **Mo:BVO/B:C3N5-x/NiFeBi** | **2.89** | **0.54** | **This work** |
| B-CN-Mo:BiVO4 | 2.67 | 0.54 | Nat. Commun. 10, 3687 (2019) |
| P-BiVO4 | 2.21 | 0.6 | Nat Commun. 13, 6231 (2022) |
| Co-Pi-BVO-VO | 1.55 | 0.7 | Adv. Mater. 31, 1807204 (2019) |
| Au/BVO-SMSI/FeOOH/NiOOH | 2.26 | 0.67 | Angew. Chem. Int. Ed. 63, e202402435 (2024) |
| BiVO4/FeOOH/NiOOH | 1.75 | 0.6 | Science 343, 990–994 (2014) |
| BFC/PAAM-45 | 1.57 | 0.81 | Adv. Funct. Mater. 2314973 (2024) |
| BiVO4/CuS/NiFeCoOx | 2.46 | 0.64 | Angew. Chem. Int. Ed. 2025, 64, e202507259 |
| BVO@ZCF(P)-O | 2.1 | 0.6 | Angew. Chem. Int. Ed. e202307246 (2023) |
| BiVO4/NiFe-LDH/Co3Ge2O5(OH)4 | 1.85 | 0.63 | ACS Catal. 15,1 1293−11306 (2025) |
| BiVO4/BiOx/NiFeOx | 2 | 0.72 | ACS Energy Lett. 10, 2162−2170 (2025) |
| OV-BiVO4/MIL-101 | 2.15 | 0.65 | Adv. Mater. 37, 2417589 (2025) |
| BV/Fe(OH)x/FeNi-H | 0.88 | 0.85 | Adv. Energy Mater. 15, 2405137 (2025) |
| BiVO4/Co-TCPP-FAA | 1.93 | 0.61 | Adv. Mater. 37, 2410632 (2025) |
| BVO/PFeMo/NiFeOx | 2.27 | 0.6 | Chem Catal. 101605 (2026) |

**Table S2.** Fitting results of EIS on Mo:BVO, Mo:BVO/NiFeBi, Mo:BVO/C3N5/NiFeBi and Mo:BVO/B:C3N5-x/NiFeBi photoanodes.

| **Samples** | ***R*s** | | ***R*ct** | **CPE(×10-5F)** |
| --- | --- | --- | --- | --- |
| Mo:BVO/B:C3N5-x/NiFeBi | 34.65 | 29.7 | | 12.5 |
| Mo:BVO/C3N5/NiFeBi | 34.95 | 49.02 | | 3.73 |
| Mo:BVO/ NiFeBi | 35.37 | 58.45 | | 2.92 |

**Table S3.** Recorded at 750 nm after excitation of a Mo:BVO, Mo:BVO/NiFeBi, Mo:BVO/C3N5/NiFeBi and Mo:BVO/B:C3N5-x/NiFeBi at 400 nm pump.

|  | Mo:BVO/B:C3N5-x/NiFeBi | Mo:BVO/C3N5/NiFeBi | Mo:BVO/NiFeBi | Mo:BVO |
| --- | --- | --- | --- | --- |
| ***A1*** | 5.9E-4 ± 1.2E-5 | 5.9E-4 ± 1.2E-5 | 6.7E-4 ± 1.3E-5 | 5.6E-4 ± 1.2E-5 |
| **(ps)** | 144.7 ± 7.5 | 102.1 ± 5.6 | 120.6 ± 6.1 | 97.5 ± 5.4 |
| ***A2*** | 7.0E-4 ± 1.0E-5 | 7.0E-4± 1.0E-5 | 1.3E-3 ± 9.6E-6 | 9.9E-4 ± 8.3E-6 |
| **(ns)** | 13.3 ± 0.9 | 11.3 ± 1.0 | 11.7± 0.5 | 11.2± 0.6 |

1. Ye, K.-H. *et al.* Enhancing photoelectrochemical water splitting by combining work function tuning and heterojunction engineering. *Nat. Commun.* ***10***, 3687 (2019).

2. Wu, H. *et al.* Low-bias photoelectrochemical water splitting via mediating trap states and small polaron hopping. *Nat. Commun.* ***13***, 6231 (2022).

3. Ren, H. *et al.* Manipulation of Charge Transport by Metallic V13O16 Decorated on Bismuth Vanadate Photoelectrochemical Catalyst. *Adv. Mater.* ***31***, 1807204 (2019).

4. He, B. *et al.* Strong Interactions between Au Nanoparticles and BiVO4 Photoanode Boosts Hole Extraction for Photoelectrochemical Water Splitting. *Angew. Chem., Int. Ed.* ***63***, e202402435 (2024).

5. Kim, T. W. *et al.* Nanoporous BiVO4 Photoanodes with Dual-Layer Oxygen Evolution Catalysts for Solar Water Splitting. *Science* ***343***, 990-994 (2014).

6. Zhang, Q. *et al.* Hydrogel Enabled Dual-Shielding Improves Efficiency and Stability of BiVO4 Based Photoanode for Solar Water Splitting. *Adv. Funct. Mater.* ***34***, 2314973 (2024).

7. Wang, J. *et al.* Photothermal CuS as a Hole Transfer Layer on BiVO4 Photoanode for Efficient Solar Water Oxidation. *Angew. Chem., Int. Ed.* ***64***, e202507259 (2025).

8. Pan, J.-B. *et al.* Introducing Bidirectional Axial Coordination into BiVO4@Metal Phthalocyanine Core–Shell Photoanodes for Efficient Water Oxidation. *Angew. Chem., Int. Ed.* ***62***, e202307246 (2023).

9. Chi, J. *et al.* Enhanced Photoelectrochemical Water Splitting on BiVO4 Photoanode via Efficient Hole Transport Layers of NiFe-LDH. *ACS Catal.* ***15***, 11293-11306 (2025).

10. Li, N. *et al.* Boosting Oxygen Evolution Reaction Performance on BiVO4 Photoanode via Gradient Oxygen Vacancies. *ACS Energy Lett.* ***10***, 2162-2170 (2025).

11. Ning, X. *et al.* In Operando Visualization of Charge Transfer Dynamics in Transition Metal Compounds on Water Splitting Photoanodes. *Adv. Energy Mater.* ***15***, 2405137 (2025).

12. Zhang, C. *et al.* Tailoring Non-Covalent Interaction Via Single Atom to Boost Interfacial Charge Transfer Toward Photoelectrochemical Water Oxidation. *Adv. Mater.* ***37***, 2410632 (2025).

13. Ding, X. *et al.* PFeMo polyoxometalate interlayer boosts BiVO4 light harvesting and charge separation for tandem photoelectrochemical water splitting. *Chem Catal.*, 101605 (2026).

**References**
