# Supplementary material
Source: Research Square preprint supplement (doi:10.21203/rs.3.rs-9089829/v1)
Supplement: Supplementary file 2 [file 8ee4258f1652772b20321f84.xlsx]

## Sheet: Fig. 1
Fig. 1b					Fig. 1c					Fig. 1d					Fig. 1e					Fig. 1f					Fig. 1g			Fig. 1i					Fig. 1j
C3N5		B:C3N5-x			C3N5		B:C3N5-x			C3N5		B:C3N5-x			C3N5		B:C3N5-x			C3N5		B:C3N5-x			B:C3N5-x			C3N5		B:C3N5-x			C3N5		B:C3N5-x
2Theta (degree)	Intensity (a.u.)	2Theta (degree)	Intensity (a.u.)		Binding energy (eV)	Intensity (a.u.)	Binding energy (eV)	Intensity (a.u.)		g factor	Intensity (a.u.)	g factor	Intensity (a.u.)		Wavelength (nm)	Absorbance (a.u.)	Wavelength (nm)	Absorbance (a.u.)		Chemical shift (ppm)	Intensity (a.u.)	Chemical shift (ppm)	Intensity (a.u.)		Chemical shift (ppm)	Intensity (a.u.)		Photo energy (eV)	Intensity (a.u.)	Photo energy (eV)	Intensity (a.u.)		Voltage (V)	Current (A)	Voltage (V)	Current (A)
0.222	7	0.222	8		196	-23.3749	196	829.334		1.89573	-0.01805	1.89577	0.01209		800	0.30643	800	0.31671		70.028	33490.7	70.028	-945675		-399.847	10022200		392.1	0.0616	392.1	0.0648		10	4.74996e-11	10	9.68213e-11
0.245	7	0.245	3		195.9	-6.4499	195.9	845.539		1.89578	-0.0135	1.89582	-0.000406039		798	0.30717	798	0.31773		70.0648	-4004700	70.0648	3872080		-399.797	10125200		392.6	0.0768	393.1	0.09		9.98798	1.99432e-11	9.98798	6.99444e-11
0.268	7	0.268	7		195.8	26.395	195.8	835.382		1.89583	-0.01502	1.89587	-0.01567		796	0.3079	796	0.31881		70.1015	-6581470	70.1015	6723420		-399.748	10491400		393.1	0.0532	394.1	0.0716		9.97596	1.229e-11	9.97596	6.20074e-11
0.291	2	0.291	8		195.7	-11.095	195.7	793.55		1.89588	-0.01822	1.89593	-0.00986		794	0.3086	794	0.31974		70.1383	-6775350	70.1383	5495060		-399.698	11031400		393.6	0.0628	395.1	0.0604		9.96394	9.92964e-12	9.96394	5.99952e-11
0.314	5	0.314	5		195.6	14.1313	195.6	838.437		1.89593	-0.00743	1.89598	-0.00932		792	0.30904	792	0.32023		70.175	-5213550	70.175	1008220		-399.649	11737500		394.1	0.0648	396.1	0.0732		9.95192	1.01991e-11	9.95192	5.59325e-11
0.337	4	0.337	6		195.5	0.47543	195.5	824.185		1.89598	-0.00367	1.89603	-0.02622		790	0.30978	790	0.32102		70.2118	-3687260	70.2118	-3782070		-399.599	12578800		394.6	0.0684	397.1	0.0796		9.9399	1.00059e-11	9.9399	5.71604e-11
0.36	6	0.36	5		195.4	23.8317	195.4	814.844		1.89603	-0.01514	1.89608	-0.02576		788	0.31051	788	0.32206		70.2486	-3862450	70.2486	-6543250		-399.55	13503500		395.1	0.0628	398.1	0.0844		9.92788	9.71268e-12	9.92788	5.63426e-11
0.383	6	0.383	3		195.3	-4.47359	195.3	796.607		1.89608	-0.02407	1.89613	-0.02093		786	0.31093	786	0.32299		70.2853	-5962470	70.2853	-7362230		-399.5	14443100		395.6	0.0676	398.1	0.0864		9.91586	1.09405e-11	9.91586	5.61042e-11
0.406	5	0.406	6		195.2	8.02641	195.2	799.461		1.89614	-0.02404	1.89618	-0.01901		784	0.31103	784	0.32356		70.3221	-8571830	70.3221	-7814420		-399.451	15319100		396.1	0.068	398.3	0.1068		9.90385	1.0478e-11	9.90385	5.5985e-11
0.429	7	0.429	2		195.1	-5.03444	195.1	804.197		1.89619	-0.02615	1.89623	-0.00896		782	0.31107	782	0.3242		70.3588	-9886740	70.3588	-8612020		-399.401	16052000		396.6	0.0732	398.5	0.132		9.89183	9.46949e-12	9.89183	5.54366e-11
0.452	6	0.452	6		195	19.6129	195	827.319		1.89624	-0.03027	1.89628	-0.01188		780	0.31133	780	0.32486		70.3956	-9368090	70.3956	-8659170		-399.352	16569700		397.1	0.0828	398.7	0.1632		9.87981	9.9964e-12	9.87981	5.54962e-11
0.475	3	0.475	5		194.9	-22.7733	194.9	829.867		1.89629	-0.01547	1.89634	-0.01527		778	0.31142	778	0.32543		70.4323	-8208910	70.4323	-6593920		-399.302	16816500		397.6	0.0936	398.9	0.276		9.86778	1.06425e-11	9.86778	5.51457e-11
0.498	3	0.498	6		194.8	8.21368	194.8	808.269		1.89634	-0.00377	1.89639	-0.00968		776	0.31182	776	0.32592		70.4691	-8063990	70.4691	-2915830		-399.253	16759600		398.1	0.1012	399.1	0.3944		9.85577	1.12648e-11	9.85577	5.35245e-11
0.521	5	0.521	5		194.7	-17.023	194.7	793.932		1.89639	-0.00921	1.89644	-0.01764		774	0.31208	774	0.32664		70.5059	-9226480	70.5059	-38008.9		-399.203	16394100		398.1	0.0836	399.3	0.526		9.84375	1.08547e-11	9.84375	5.3472e-11
0.544	3	0.544	6		194.6	41.4636	194.6	793.588		1.89644	-0.01384	1.89649	-0.03774		772	0.3121	772	0.3275		70.5426	-10102900	70.5426	28981.4		-399.154	15744100		398.2	0.0788	399.5	0.5368		9.83173	1.05495e-11	9.83173	5.2051e-11
0.567	4	0.567	7		194.5	19.3866	194.5	810.27		1.8965	-0.02108	1.89654	-0.03798		770	0.31225	770	0.32861		70.5794	-8633430	70.5794	-2139820		-399.104	14861100		398.3	0.0832	399.7	0.5532		9.81971	1.06568e-11	9.81971	5.32503e-11
0.59	5	0.59	8		194.4	-22.7466	194.4	847.449		1.89655	-0.02506	1.89659	-0.01261		768	0.31235	768	0.32939		70.6161	-4369070	70.6161	-3828850		-399.055	13819400		398.4	0.1064	399.9	0.6092		9.80769	8.67079e-12	9.80769	5.33123e-11
0.613	3	0.613	8		194.3	-12.4173	194.3	827.554		1.8966	-0.01939	1.89664	-0.00145		766	0.31279	766	0.33025		70.6529	784911	70.6529	-2895310		-399.005	12708500		398.5	0.1104	400.1	0.6264		9.79567	9.85334e-12	9.79567	5.23538e-11
0.636	5	0.636	5		194.2	25.898	194.2	841.127		1.89665	-0.01351	1.89669	-0.0068		764	0.31321	764	0.33107		70.6896	3898830	70.6896	119548		-398.956	11624200		398.6	0.1196	400.3	0.5712		9.78365	1.03969e-11	9.78365	5.05371e-11
0.659	10	0.659	5		194.1	28.2851	194.1	805.15		1.8967	-0.01327	1.89675	-0.00889		762	0.31355	762	0.3322		70.7264	3223480	70.7264	2703240		-398.906	10658700		398.7	0.1584	400.5	0.5256		9.77163	1.00035e-11	9.77163	5.1424e-11
0.682	9	0.682	7		194	-12.1092	194	847.684		1.89675	-0.02257	1.8968	-0.000206997		760	0.31425	760	0.33344		70.7631	-637322	70.7631	3061860		-398.857	9891110		398.8	0.1796	400.7	0.4332		9.75961	9.3622e-12	9.75961	4.96931e-11
0.705	8	0.705	4		193.9	1.72988	193.9	842.442		1.8968	-0.02956	1.89685	0.00528		758	0.31452	758	0.33459		70.7999	-5410230	70.7999	1862700		-398.807	9379890		398.9	0.2588	400.9	0.3776		9.7476	8.89252e-12	9.7476	4.99983e-11
0.728	9	0.728	3		193.8	17.2137	193.8	883.941		1.89685	-0.02371	1.8969	-0.01372		756	0.31493	756	0.33575		70.8367	-8859730	70.8367	1254810		-398.758	9156730		399	0.3108	401.1	0.3772		9.73558	1.00703e-11	9.73558	5.0313e-11
0.751	7	0.751	8		193.7	-14.8135	193.7	856.763		1.89691	-0.01862	1.89695	-0.02216		754	0.31517	754	0.33685		70.8734	-10046400	70.8734	2391430		-398.708	9224150		399.1	0.3444	401.3	0.3984		9.72356	9.79851e-12	9.72356	4.83413e-11
0.774	6	0.774	9		193.6	16.7011	193.6	864.787		1.89696	-0.00863	1.897	-0.0079		752	0.31571	752	0.33794		70.9102	-9385060	70.9102	4194800		-398.659	9555890		399.2	0.398	401.5	0.4152		9.71154	9.9654e-12	9.71154	4.91185e-11
0.797	8	0.797	8		193.5	-9.68438	193.5	910.031		1.89701	0.00159	1.89705	-0.00288		750	0.31608	750	0.33896		70.9469	-7857250	70.9469	4597410		-398.609	10100500		399.3	0.4316	401.7	0.4164		9.69952	9.56009e-12	9.69952	4.93426e-11
0.82	7	0.82	9		193.4	22.4365	193.4	912.139		1.89706	-0.00156	1.8971	-0.01071		748	0.31639	748	0.34041		70.9837	-6190850	70.9837	2783210		-398.56	10787300		399.4	0.4808	401.9	0.4268		9.6875	1.05328e-11	9.6875	4.87728e-11
0.843	11	0.843	12		193.3	-40.2245	193.3	911.707		1.89711	-0.01047	1.89716	-0.01371		746	0.31681	746	0.34169		71.0204	-4526970	71.0204	15901.5		-398.51	11534700		399.5	0.4868	402.1	0.4644		9.67548	9.67692e-12	9.67548	4.88777e-11
0.866	6	0.866	10		193.2	17.2975	193.2	956.043		1.89716	-0.00662	1.89721	-0.01489		744	0.31721	744	0.34297		71.0572	-2632970	71.0572	-1687160		-398.461	12258800		399.6	0.5144	402.3	0.5032		9.66346	9.62208e-12	9.66346	4.82602e-11
0.889	5	0.889	6		193.1	-5.8887	193.1	1016.32		1.89721	0.00818	1.89726	-0.02032		742	0.31745	742	0.34403		71.0939	-440236	71.0939	-1508090		-398.411	12882000		399.7	0.5168	402.5	0.5744		9.65144	8.90682e-12	9.65144	4.66676e-11
0.912	3	0.912	7		193	13.1264	193	1050.82		1.89726	-0.00219	1.89731	-0.01823		740	0.31772	740	0.34519		71.1307	1495840	71.1307	-428273		-398.362	13341100		399.8	0.5264	402.7	0.5432		9.63942	1.03469e-11	9.63942	4.65603e-11
0.935	5	0.935	4		192.9	9.74281	192.9	1101.7		1.89732	-0.02051	1.89736	-0.01634		738	0.31788	738	0.34644		71.1675	2116920	71.1675	-78539.1		-398.312	13592300		399.9	0.5024	402.9	0.526		9.6274	8.86868e-12	9.6274	4.56328e-11
0.958	3	0.958	6		192.8	-6.85704	192.8	1154.05		1.89737	-0.01818	1.89741	-0.01042		736	0.31826	736	0.34773		71.2042	755857	71.2042	-1162700		-398.263	13614800		400	0.4944	403.1	0.5272		9.61538	1.03445e-11	9.61538	4.65007e-11
0.981	11	0.981	7		192.7	15.6608	192.7	1153.58		1.89742	-0.01104	1.89746	-0.01109		734	0.31852	734	0.34894		71.241	-1815860	71.241	-2924180		-398.213	13411100		400.1	0.5232	403.3	0.5112		9.60336	9.62208e-12	9.60336	4.63075e-11
1.004	5	1.004	10		192.6	13.3344	192.6	1248.66		1.89747	-0.01459	1.89752	-0.02725		732	0.31889	732	0.3505		71.2777	-3390380	71.2777	-3902050		-398.164	13004800		400.2	0.4876	403.5	0.5104		9.59135	1.0261e-11	9.59135	4.54945e-11
1.027	7	1.027	8		192.5	-6.03638	192.5	1286.86		1.89752	-0.02421	1.89757	-0.02842		730	0.3192	730	0.35177		71.3145	-1950390	71.3145	-3114630		-398.114	12436200		400.3	0.4436	403.7	0.4876		9.57933	9.8748e-12	9.57933	4.76689e-11
1.05	5	1.05	3		192.4	9.04834	192.4	1375.89		1.89757	-0.02575	1.89762	-0.02454		728	0.31951	728	0.35301		71.3512	2196800	71.3512	-748669		-398.065	11756600		400.4	0.4204	403.9	0.5504		9.56731	9.32406e-12	9.56731	4.57258e-11
1.073	7	1.073	5		192.3	-8.33184	192.3	1385.72		1.89762	-0.02549	1.89767	-0.02817		726	0.31974	726	0.35417		71.388	5978880	71.388	1955770		-398.015	11021200		400.5	0.4072	404.1	0.5432		9.55528	9.55771e-12	9.55528	4.5249e-11
1.096	11	1.096	10		192.2	8.71571	192.2	1379.8		1.89768	-0.01556	1.89772	-0.02087		724	0.32005	724	0.35559		71.4247	5884400	71.4247	3443780		-397.966	10283300		400.6	0.3852	404.3	0.5604		9.54327	1.02801e-11	9.54327	4.52537e-11
1.119	8	1.119	5		192.1	20.4702	192.1	1438.53		1.89773	-0.00159	1.89777	-0.01243		722	0.32052	722	0.35715		71.4615	1367590	71.4615	2832160		-397.916	9588330		400.7	0.36	404.5	0.564		9.53125	9.48141e-12	9.53125	4.45695e-11
1.142	7	1.142	7		192	-11.0182	192	1440.62		1.89778	-0.00489	1.89782	-0.00947		720	0.32093	720	0.3585		71.4983	-3998000	71.4983	593021		-397.867	8970380		400.8	0.3528	404.7	0.646		9.51923	9.75083e-12	9.51923	4.4846e-11
1.165	7	1.165	4		191.9	6.02627	191.9	1447.72		1.89783	-0.01234	1.89787	-0.00583		718	0.32133	718	0.35967		71.535	-5293730	71.535	-1681050		-397.817	8450180		400.9	0.318	404.9	0.6072		9.50721	1.01633e-11	9.50721	4.41975e-11
1.188	9	1.188	11		191.8	5.63347	191.8	1478.61		1.89788	-0.01429	1.89793	-0.00152		716	0.32172	716	0.36108		71.5718	-803217	71.5718	-2526950		-397.768	8035500		401	0.2988	405.1	0.672		9.49519	8.89013e-12	9.49519	4.39544e-11
1.211	6	1.211	5		191.7	-15.6678	191.7	1492.2		1.89793	-0.00989	1.89798	0.00338		714	0.32203	714	0.36225		71.6085	6016520	71.6085	-1956810		-397.718	7723400		401.1	0.3748	405.3	0.7132		9.48317	1.02086e-11	9.48317	4.25286e-11
1.234	4	1.234	13		191.6	-11.7387	191.6	1443.13		1.89798	0.00107	1.89803	0.00393		712	0.32229	712	0.36333		71.6453	9397650	71.6453	-1523430		-397.669	7503880		401.2	0.3292	405.5	0.662		9.47115	8.52535e-12	9.47115	4.34274e-11
1.257	10	1.257	11		191.5	38.0598	191.5	1385.3		1.89803	0.000709372	1.89808	0.000818369		710	0.3227	710	0.36471		71.682	6510640	71.682	-2742900		-397.619	7364350		401.3	0.3312	405.7	0.6376		9.45913	9.634e-12	9.45913	4.30126e-11
1.28	14	1.28	10		191.4	-31.7206	191.4	1389.18		1.89809	-0.01278	1.89813	-0.01232		708	0.32307	708	0.36606		71.7188	51294.7	71.7188	-5302710		-397.57	7294190		401.4	0.3528	405.9	0.716		9.44711	9.29545e-12	9.44711	4.23236e-11
1.303	16	1.303	22		191.3	8.71626	191.3	1318.05		1.89814	-0.01704	1.89818	-0.02628		706	0.32332	706	0.36724		71.7555	-4456650	71.7555	-7067370		-397.52	7288490		401.5	0.3576	406.1	0.6792		9.4351	9.97971e-12	9.4351	4.23975e-11
1.326	19	1.326	21		191.2	4.56914	191.2	1251.88		1.89819	-0.00705	1.89823	-0.03571		704	0.32336	704	0.36834		71.7923	-4020500	71.7923	-6213750		-397.471	7350540		401.6	0.3752	406.3	0.6736		9.42308	9.86288e-12	9.42308	4.13365e-11
1.349	31	1.349	31		191.1	-0.52879	191.1	1192.85		1.89824	0.01497	1.89829	-0.04296		702	0.32343	702	0.36951		71.8291	-851763	71.8291	-3389180		-397.421	7492520		401.7	0.3844	406.5	0.6972		9.41106	9.68168e-12	9.41106	4.13031e-11
1.372	49	1.372	51		191	26.911	191	1232.12		1.89829	0.02197	1.89834	-0.03859		700	0.32354	700	0.37082		71.8658	273253	71.8658	-1373080		-397.372	7734220		401.8	0.3752	406.7	0.6768		9.39904	9.81997e-12	9.39904	3.98917e-11
1.395	70	1.395	90		190.9	-36.6524	190.9	1156.99		1.89834	0.0014	1.89839	-0.02892		698	0.32352	698	0.37189		71.9026	-2857000	71.9026	-2216730		-397.322	8099970		401.9	0.3748	406.9	0.6876		9.38702	8.68509e-12	9.38702	3.99561e-11
1.418	81	1.418	93		190.8	-2.21781	190.8	1091.82		1.89839	-0.01869	1.89844	-0.02297		696	0.32361	696	0.37309		71.9393	-7617930	71.9393	-4774550		-397.273	8614130		402	0.3796	407.1	0.6924		9.375	9.6793e-12	9.375	4.03113e-11
1.441	133	1.441	106		190.7	-11.4218	190.7	1051.23		1.89845	-0.02004	1.89849	-0.01086		694	0.32383	694	0.37441		71.9761	-9441300	71.9761	-5531290		-397.223	9295790		402.1	0.3772	407.3	0.6748		9.36298	9.45757e-12	9.36298	3.96747e-11
1.464	136	1.464	125		190.6	-8.564	190.6	996.862		1.8985	-0.00722	1.89854	0.00395		692	0.32383	692	0.37551		72.0128	-6760630	72.0128	-2257530		-397.174	10153500		402.2	0.4	407.5	0.7004		9.35096	8.51582e-12	9.35096	3.84993e-11
1.487	114	1.487	96		190.5	1.1005	190.5	913.462		1.89855	0.00629	1.89859	0.00105		690	0.32386	690	0.37667		72.0496	-2786520	72.0496	3246920		-397.124	11180500		402.3	0.4464	407.7	0.7104		9.33894	8.99265e-12	9.33894	3.96056e-11
1.51	97	1.51	98		190.4	29.3309	190.4	948.296		1.8986	0.00938	1.89865	-0.01173		688	0.32388	688	0.37774		72.0864	-2248490	72.0864	6475600		-397.075	12352000		402.4	0.4412	407.9	0.7316		9.32692	9.55294e-12	9.32692	3.98416e-11
1.533	85	1.533	108		190.3	11.3068	190.3	920.02		1.89865	0.00195	1.8987	-0.01938		686	0.32389	686	0.37877		72.1231	-6483620	72.1231	4577860		-397.025	13623800		402.5	0.4624	408.1	0.7008		9.3149	9.50525e-12	9.3149	3.86543e-11
1.556	88	1.556	111		190.2	-19.8027	190.2	909.976		1.8987	-0.000665825	1.89875	-0.0186		684	0.32395	684	0.37995		72.1599	-11910900	72.1599	-668152		-396.975	14934100		402.6	0.5396	408.3	0.7264		9.30288	8.57542e-12	9.30288	3.81799e-11
1.579	91	1.579	102		190.1	-3.29598	190.1	901.047		1.89875	-0.0077	1.8988	-0.01609		682	0.32394	682	0.3812		72.1966	-13397400	72.1966	-4486230		-396.926	16207100		402.7	0.4908	408.5	0.7264		9.29086	7.85063e-12	9.29086	3.73788e-11
1.602	109	1.602	111		190	26.2738	190	873.582		1.89881	-0.01884	1.89885	-0.01565		680	0.32399	680	0.38253		72.2334	-9093740	72.2334	-3780780		-396.876	17358800		402.8	0.496	408.7	0.7696		9.27885	8.90921e-12	9.27885	3.70331e-11
1.625	121	1.625	132		189.9	-2.67426	189.9	891.443		1.89886	-0.01397	1.8989	-0.01287		678	0.32402	678	0.38393		72.2701	-2024300	72.2701	-41323.6		-396.827	18304600		402.9	0.506	408.9	0.7704		9.26683	8.56588e-12	9.26683	3.58457e-11
1.648	132	1.648	138		189.8	-1.69542	189.8	866.726		1.89891	-0.00084074	1.89895	-0.00903		676	0.32409	676	0.38541		72.3069	2857790	72.3069	2512160		-396.777	18967400		403	0.4636	409.1	0.732		9.25481	8.40853e-12	9.25481	3.62463e-11
1.671	157	1.671	142		189.7	-6.95939	189.7	859.308		1.89896	0.00682	1.899	-0.0051		674	0.3243	674	0.38708		72.3436	3043600	72.3436	1483260		-396.728	19285500		403.1	0.4388	409.3	0.7984		9.24278	9.15001e-12	9.24278	3.62749e-11
1.694	141	1.694	151		189.6	11.098	189.6	861.75		1.89901	0.00389	1.89906	0.00236		672	0.32461	672	0.38881		72.3804	155710	72.3804	-1326510		-396.678	19219600		403.2	0.4536	409.5	0.7836		9.23077	7.60267e-12	9.23077	3.6983e-11
1.717	150	1.717	170		189.5	-4.37221	189.5	853.591		1.89906	-0.01235	1.89911	0.01435		670	0.32511	670	0.39089		72.4172	-2170020	72.4172	-2158020		-396.629	18757500		403.3	0.446	409.7	0.7744		9.21875	9.27399e-12	9.21875	3.66635e-11
1.74	142	1.74	142		189.4	-5.31977	189.4	840.106		1.89911	-0.01676	1.89916	0.00997		668	0.32572	668	0.39313		72.4539	-1705840	72.4539	426611		-396.579	17916800		403.4	0.4596	409.9	0.7888		9.20673	9.07848e-12	9.20673	3.48277e-11
1.763	153	1.763	179		189.3	6.6156	189.3	825.19		1.89917	0.00527	1.89921	-0.00826		666	0.3265	666	0.39546		72.4907	881009	72.4907	3918300		-396.53	16744100		403.5	0.4424	410.1	0.7216		9.19471	8.87821e-12	9.19471	3.3874e-11
1.786	136	1.786	185		189.2	-2.21429	189.2	803.61		1.89922	0.00959	1.89926	-0.01716		664	0.32741	664	0.39787		72.5274	3353250	72.5274	4579220		-396.48	15311800		403.6	0.4256	410.3	0.7508		9.18269	9.67215e-12	9.18269	3.42912e-11
1.809	153	1.809	194		189.1	26.4939	189.1	805.793		1.89927	0.00255	1.89931	-0.01539		662	0.32838	662	0.40043		72.5642	4234010	72.5642	1464470		-396.431	13712300		403.7	0.4348	410.5	0.7492		9.17067	8.41806e-12	9.17067	3.35498e-11
1.832	145	1.832	179		189	-10.3192	189	786.042		1.89932	0.01494	1.89936	0.00144		660	0.32951	660	0.4032		72.6009	3867130	72.6009	-2589190		-396.381	12050200		403.8	0.4248	410.7	0.7344		9.15865	9.02842e-12	9.15865	3.40409e-11
1.855	160	1.855	205		188.9	10.3005	188.9	810.264		1.89937	0.00888	1.89942	0.01146		658	0.33074	658	0.40595		72.6377	3598340	72.6377	-3940410		-396.332	10433600		403.9	0.4484	410.9	0.7796		9.14663	9.00457e-12	9.14663	3.34449e-11
1.878	157	1.878	174		188.8	-11.0073	188.8	833.265		1.89942	-0.00511	1.89947	0.00246		656	0.33204	656	0.40873		72.6744	4237700	72.6744	-1781960		-396.282	8964790		404	0.484	411.1	0.7568		9.13461	8.91874e-12	9.13461	3.24364e-11
1.901	171	1.901	160		188.7	25.2967	188.7	844.669		1.89947	-0.0058	1.89952	-0.00321		654	0.33336	654	0.41172		72.7112	5260620	72.7112	1355390		-396.233	7732420		404.1	0.462	411.3	0.7704		9.1226	9.35743e-12	9.1226	3.26891e-11
1.924	167	1.924	193		188.6	-23.0937	188.6	801.537		1.89953	-0.01667	1.89957	-0.01044		652	0.3348	652	0.41478		72.748	5238170	72.748	2484790		-396.183	6804890		404.2	0.4868	411.5	0.7752		9.11058	8.59449e-12	9.11058	3.15351e-11
1.947	156	1.947	186		188.5	12.5621	188.5	838.906		1.89958	-0.02083	1.89962	-0.02427		650	0.33631	650	0.41784		72.7847	2971240	72.7847	1151110		-396.134	6226070		404.3	0.5308	411.7	0.7612		9.09856	9.13809e-12	9.09856	3.16591e-11
1.97	150	1.97	230		188.4	7.28873	188.4	815.062		1.89963	-0.01356	1.89967	-0.02502		648	0.33774	648	0.42093		72.8215	-1520610	72.8215	-532494		-396.084	6013660		404.4	0.5672	411.9	0.7664		9.08654	9.25968e-12	9.08654	3.17426e-11
1.993	169	1.993	197							1.89968	-0.00897	1.89972	-0.01547		646	0.33921	646	0.42413		72.8582	-6773360	72.8582	-461177		-396.035	6160130		404.5	0.5484	412.1	0.7476		9.07452	8.53489e-12	9.07452	3.04074e-11
2.016	163	2.016	189							1.89973	-0.00393	1.89978	-0.02011		644	0.34072	644	0.42735		72.895	-10603500	72.895	1268910		-395.985	6635940		404.6	0.5748	412.3	0.786		9.0625	8.59449e-12	9.0625	2.99449e-11
2.039	180	2.039	190							1.89978	-0.00731	1.89983	-0.02157		642	0.34223	642	0.43053		72.9317	-11433800	72.9317	2750610		-395.936	7394610		404.7	0.5508	412.5	0.7776		9.05048	9.0618e-12	9.05048	3.01666e-11
2.062	173	2.062	179							1.89983	-0.00965	1.89988	-0.00811		640	0.34368	640	0.43384		72.9685	-9350050	72.9685	2454290		-395.886	8378700		404.8	0.5736	412.7	0.7512		9.03846	9.3622e-12	9.03846	3.07579e-11
2.085	176	2.085	203							1.89989	0.00298	1.89993	-0.00933		638	0.3452	638	0.43722		73.0052	-5999790	73.0052	706116		-395.837	9526110		404.9	0.6036	412.9	0.788		9.02644	9.53863e-12	9.02644	3.02357e-11
2.108	191	2.108	191							1.89994	0.00922	1.89998	-0.01058		636	0.34668	636	0.44061		73.042	-3272380	73.042	-891511		-395.787	10775700		405	0.6024	413.1	0.7644		9.01442	8.45383e-12	9.01442	3.11632e-11
2.131	186	2.131	186							1.89999	0.00122	1.90003	-0.00653		634	0.34808	634	0.44395		73.0788	-1854950	73.0788	-1103510		-395.738	12071700		405.1	0.5904				9.0024	7.28319e-12	9.0024	3.02262e-11
2.154	175	2.154	207							1.90004	-0.00879	1.90009	-0.0189		632	0.3495	632	0.44731		73.1155	-1027930	73.1155	51372		-395.688	13366600		405.2	0.614				8.99038	9.35267e-12	8.99038	2.93298e-11
2.177	176	2.177	180							1.90009	-0.0162	1.90014	-0.02451		630	0.35092	630	0.45067		73.1523	99641.7	73.1523	1740780		-395.639	14621800		405.3	0.6712				8.97836	8.81146e-12	8.97836	2.95133e-11
2.2	184	2.2	185							1.90014	-0.01296	1.90019	-0.02564		628	0.3524	628	0.454		73.189	1279530	73.189	3159510		-395.589	15806900		405.4	0.6116				8.96635	8.51582e-12	8.96635	3.03168e-11
2.223	176	2.223	216							1.90019	-0.00964	1.90024	-0.03354		626	0.35396	626	0.45747		73.2258	1314550	73.2258	3828130		-395.54	16897600		405.5	0.624				8.95433	8.23448e-12	8.95433	2.92606e-11
2.246	192	2.246	204							1.90025	-0.01152	1.90029	-0.03296		624	0.35552	624	0.46097		73.2625	-297469	73.2625	3485250		-395.49	17872500		405.6	0.6288				8.94231	8.79715e-12	8.94231	2.94227e-11
2.269	194	2.269	189							1.9003	-0.00499	1.90034	-0.0368		622	0.35723	622	0.46454		73.2993	-2136270	73.2993	2219080		-395.441	18710000		405.6	0.598				8.93028	8.34416e-12	8.93028	2.984e-11
2.292	179	2.292	186							1.90035	-0.00693	1.90039	-0.03785		620	0.35897	620	0.46819		73.336	-1789090	73.336	799298		-395.391	19386100		406.1	0.6104				8.91827	8.08428e-12	8.91827	2.93417e-11
2.315	200	2.315	194							1.9004	-0.01745	1.90045	-0.02666		618	0.36079	618	0.47191		73.3728	1588990	73.3728	446613		-395.342	19872600		406.6	0.638				8.90625	9.46234e-12	8.90625	2.83642e-11
2.338	161	2.338	217							1.90045	-0.01833	1.9005	-0.01515		616	0.36277	616	0.47578		73.4096	5708850	73.4096	1769110		-395.292	20138000		407.1	0.6456				8.89423	9.33598e-12	8.89423	2.8717e-11
2.361	164	2.361	218							1.9005	-0.01804	1.90055	0.00782		614	0.36491	614	0.47982		73.4463	6654310	73.4463	3834190		-395.243	20149000		407.6	0.6624				8.88221	8.56588e-12	8.88221	2.83928e-11
2.384	183	2.384	223							1.90055	-0.0214	1.9006	0.01918		612	0.3672	612	0.48405		73.4831	2538420	73.4831	4636540		-395.193	19874400		408.1	0.6696				8.87019	9.07133e-12	8.87019	2.88529e-11
2.407	178	2.407	212							1.90061	-0.01283	1.90065	0.00257		610	0.36961	610	0.48843		73.5198	-4109580	73.5198	2869850		-395.144	19290000							8.85817	7.78864e-12	8.85817	2.77991e-11
2.43	192	2.43	211							1.90066	0.00872	1.9007	-0.01783		608	0.3721	608	0.49284		73.5566	-7865750	73.5566	-677575		-395.094	18384000							8.84615	8.02944e-12	8.84615	2.83832e-11
2.453	201	2.453	222							1.90071	0.0167	1.90075	-0.02199		606	0.37475	606	0.49739		73.5933	-4884560	73.5933	-3653610		-395.045	17161500							8.83413	8.85437e-12	8.83413	2.77729e-11
2.476	187	2.476	210							1.90076	0.00131	1.90081	-0.01406		604	0.37751	604	0.50212		73.6301	3600730	73.6301	-4218110		-394.995	15649500							8.82211	8.12004e-12	8.82211	2.62875e-11
2.499	188	2.499	196							1.90081	-0.01429	1.90086	-0.00865		602	0.3804	602	0.50701		73.6669	12003800	73.6669	-2618990		-394.946	13898000							8.8101	8.7447e-12	8.8101	2.63901e-11
2.522	163	2.522	210							1.90086	-0.01551	1.90091	-0.000387944		600	0.38342	600	0.51187		73.7036	14800000	73.7036	-721843		-394.896	11980000							8.79808	8.40376e-12	8.79808	2.64211e-11
2.545	196	2.545	202							1.90092	-0.01615	1.90096	-0.00277		598	0.38658	598	0.51685		73.7404	10776100	73.7404	-96871.2		-394.847	9988750							8.78606	7.5383e-12	8.78606	2.74534e-11
2.568	192	2.568	221							1.90097	-0.011	1.90101	-0.01158		596	0.38983	596	0.52197		73.7771	3529320	73.7771	-698968		-394.797	8031320							8.77404	7.78864e-12	8.77404	2.59704e-11
2.591	181	2.591	221							1.90102	0.00136	1.90106	-0.01579		594	0.39326	594	0.52714		73.8139	-1893270	73.8139	-1367510		-394.748	6220960							8.76202	8.04613e-12	8.76202	2.62708e-11
2.614	202	2.614	207							1.90107	-0.00216	1.90112	-0.0201		592	0.39684	592	0.53241		73.8506	-3005920	73.8506	-1344160		-394.698	4667370							8.75	8.10097e-12	8.75	2.67358e-11
2.637	159	2.637	219							1.90112	-0.00827	1.90117	-0.01909		590	0.40053	590	0.53785		73.8874	-1156010	73.8874	-1061800		-394.649	3466570							8.73798	8.24879e-12	8.73798	2.6948e-11
2.66	182	2.66	196							1.90117	-0.02011	1.90122	-0.01925		588	0.4044	588	0.54338		73.9241	525530	73.9241	-1504940		-394.599	2691290							8.72596	8.49436e-12	8.72596	2.52814e-11
2.683	192	2.683	220							1.90122	-0.03709	1.90127	-0.02141		586	0.40832	586	0.54893		73.9609	142156	73.9609	-3082040		-394.55	2383040							8.71394	7.72904e-12	8.71394	2.58083e-11
2.706	186	2.706	228							1.90128	-0.02749	1.90132	-0.02181		584	0.41237	584	0.55454		73.9977	-1761970	73.9977	-5284120		-394.5	2546920							8.70192	7.2522e-12	8.70192	2.61993e-11
2.729	177	2.729	209							1.90133	-0.01389	1.90137	-0.01881		582	0.41659	582	0.56039		74.0344	-3473370	74.0344	-7267230		-394.451	3149740							8.6899	7.12107e-12	8.6899	2.61516e-11
2.752	207	2.752	230							1.90138	-0.01189	1.90142	-0.01082		580	0.42089	580	0.56634		74.0712	-4150330	74.0712	-8455770		-394.401	4121970							8.67788	8.5635e-12	8.67788	2.63758e-11
2.775	168	2.775	212							1.90143	-0.01046	1.90148	-0.00523		578	0.42537	578	0.57241		74.1079	-4500770	74.1079	-8543050		-394.352	5363390							8.66586	7.915e-12	8.66586	2.53672e-11
2.798	193	2.798	240							1.90148	-0.00499	1.90153	-0.01201		576	0.42999	576	0.57858		74.1447	-5619960	74.1447	-7273970		-394.302	6751980							8.65385	7.63605e-12	8.65385	2.51527e-11
2.821	214	2.821	230							1.90153	-0.00293	1.90158	-0.02547		574	0.43478	574	0.58483		74.1814	-7432300	74.1814	-4656890		-394.253	8155180							8.64183	6.70145e-12	8.64183	2.53434e-11
2.844	200	2.844	241							1.90159	-0.01039	1.90163	-0.02584		572	0.4397	572	0.59114		74.2182	-8489570	74.2182	-1422750		-394.203	9442390							8.62981	8.35846e-12	8.62981	2.45018e-11
2.867	199	2.867	185							1.90164	-0.00998	1.90168	-0.01903		570	0.44474	570	0.59759		74.2549	-7383960	74.2549	1121490		-394.154	10497400							8.61778	7.90308e-12	8.61778	2.46901e-11
2.89	203	2.89	186							1.90169	-0.00518	1.90173	-0.01603		568	0.44995	568	0.60419		74.2917	-4300120	74.2917	2092080		-394.104	11229100							8.60577	8.29647e-12	8.60577	2.38986e-11
2.913	202	2.913	211							1.90174	-0.01597	1.90179	-0.01503		566	0.45531	566	0.6109		74.3285	-1019390	74.3285	1884050		-394.055	11580500							8.59375	7.8697e-12	8.59375	2.28591e-11
2.936	202	2.936	218							1.90179	-0.02311	1.90184	-0.01533		564	0.46097	564	0.61784		74.3652	745620	74.3652	1720960		-394.005	11532700							8.58173	7.25935e-12	8.58173	2.22845e-11
2.959	201	2.959	213							1.90184	-0.01691	1.90189	-0.01222		562	0.46699	562	0.62507		74.402	1007830	74.402	2171080		-393.956	11106200							8.56971	8.6541e-12	8.56971	2.38461e-11
2.982	197	2.982	231							1.90189	-0.01298	1.90194	-0.00281		560	0.47301	560	0.63229		74.4387	1331370	74.4387	2326630		-393.906	10357800							8.55769	7.58122e-12	8.55769	2.24585e-11
3.005	189	3.005	214							1.90195	-0.00234	1.90199	0.00134		558	0.47907	558	0.63955		74.4755	2841190	74.4755	839988		-393.857	9372910							8.54567	7.94123e-12	8.54567	2.29068e-11
3.028	201	3.028	224							1.902	0.0023	1.90204	-0.0119		556	0.48516	556	0.64692		74.5122	4493830	74.5122	-2141110		-393.807	8256560							8.53365	7.67181e-12	8.53365	2.24132e-11
3.051	194	3.051	232							1.90205	0.00567	1.90209	-0.01953		554	0.4913	554	0.6543		74.549	3728420	74.549	-4434560		-393.758	7121280							8.52163	7.91739e-12	8.52163	2.13022e-11
3.074	190	3.074	241							1.9021	0.01199	1.90215	-0.02058		552	0.49752	552	0.6617		74.5857	-734196	74.5857	-3674140		-393.708	6075400							8.50961	7.40002e-12	8.50961	2.16503e-11
3.097	213	3.097	236							1.90215	-0.00267	1.9022	-0.01499		550	0.50377	550	0.6691		74.6225	-6708340	74.6225	191071		-393.659	5212070							8.4976	7.24981e-12	8.4976	2.21653e-11
3.12	212	3.12	213							1.9022	-0.01839	1.90225	-0.00131		548	0.51007	548	0.67651		74.6593	-9654500	74.6593	4523600		-393.609	4600480							8.48558	6.73006e-12	8.48558	2.0947e-11
3.143	201	3.143	246							1.90226	-0.01781	1.9023	0.00284		546	0.5162	546	0.68377		74.696	-6673420	74.696	6415160		-393.56	4280240							8.47356	8.12243e-12	8.47356	2.19436e-11
3.166	215	3.166	217							1.90231	-0.0092	1.90235	0.00239		544	0.52209	544	0.69079		74.7328	257453	74.7328	5460260		-393.51	4259410							8.46154	7.09007e-12	8.46154	2.19126e-11
3.189	196	3.189	232							1.90236	-0.01598	1.9024	-0.00589		542	0.52807	542	0.69791		74.7695	5319880	74.7695	3889550		-393.461	4516300							8.44952	7.1306e-12	8.44952	2.12927e-11
3.212	217	3.212	190							1.90241	-0.03317	1.90246	-0.00561		540	0.5341	540	0.70509		74.8063	3803920	74.8063	3879920		-393.411	5004680							8.4375	6.58701e-12	8.4375	2.12951e-11
3.235	200	3.235	239							1.90246	-0.01957	1.90251	-0.0042		538	0.54014	538	0.71222		74.843	-3425430	74.843	5020000		-393.362	5661630							8.42548	6.70622e-12	8.42548	2.02174e-11
3.258	188	3.258	220							1.90251	-0.00141	1.90256	-0.01909		536	0.54614	536	0.71939		74.8798	-10331000	74.8798	4819270		-393.312	6416860							8.41346	7.69327e-12	8.41346	2.07038e-11
3.281	190	3.281	210							1.90257	-0.01502	1.90261	-0.02452		534	0.55208	534	0.72656		74.9165	-10918200	74.9165	1768020		-393.263	7202380							8.40144	7.47154e-12	8.40144	2.05679e-11
3.304	197	3.304	221							1.90262	-0.02488	1.90266	-0.02353		532	0.558	532	0.73372		74.9533	-4527450	74.9533	-2486560		-393.213	7961140							8.38942	7.13537e-12	8.38942	2.08969e-11
3.327	172	3.327	246							1.90267	-0.01221	1.90271	-0.02343		530	0.56398	530	0.74092		74.9901	3710390	74.9901	-4426120		-393.164	8653600							8.3774	8.05805e-12	8.3774	1.93806e-11
3.35	194	3.35	239							1.90272	-0.00469	1.90277	-0.01027		528	0.57012	528	0.74817		75.0268	7546560	75.0268	-2187570		-393.114	9261360							8.36538	6.16739e-12	8.36538	1.95045e-11
3.373	205	3.373	206							1.90277	-0.01211	1.90282	-0.00106		526	0.5763	526	0.75542		75.0636	4867900	75.0636	2428000		-393.065	9787440							8.35336	7.9603e-12	8.35336	1.99075e-11
3.396	197	3.396	236							1.90282	-0.01012	1.90287	-0.01334		524	0.58238	524	0.7626		75.1003	-1240840	75.1003	5645270		-393.015	10253300							8.34135	6.89934e-12	8.34135	1.90086e-11
3.419	199	3.419	236							1.90287	0.00298	1.90292	-0.01683		522	0.58838	522	0.76978		75.1371	-5987790	75.1371	5318380		-392.966	10692900							8.32933	7.64797e-12	8.32933	1.92518e-11
3.442	211	3.442	225							1.90293	-0.00205	1.90297	-0.00475		520	0.59443	520	0.77697		75.1738	-6962070	75.1738	2680400		-392.916	11145100							8.31731	7.97461e-12	8.31731	1.94187e-11
3.465	183	3.465	235							1.90298	-0.01144	1.90302	-0.00895		518	0.60053	518	0.78418		75.2106	-5003080	75.2106	597212		-392.867	11644600							8.30528	7.07577e-12	8.30528	1.93043e-11
3.488	211	3.488	222							1.90303	-0.00425	1.90308	-0.01904		516	0.60675	516	0.79145		75.2474	-2004590	75.2474	465228		-392.817	12213900							8.29327	7.63128e-12	8.29327	2.01626e-11
3.511	196	3.511	225							1.90308	-0.00257	1.90313	-0.00372		514	0.613	514	0.79876		75.2841	1071700	75.2841	1136770		-392.768	12856600							8.28125	7.01378e-12	8.28125	1.93758e-11
3.534	189	3.534	251							1.90313	-0.01179	1.90318	0.01179		512	0.61916	512	0.806		75.3209	3776530	75.3209	748800		-392.718	13553500							8.26923	7.41432e-12	8.26923	1.89204e-11
3.557	225	3.557	222							1.90318	-0.02052	1.90323	0.000341875		510	0.62524	510	0.81327		75.3576	4727910	75.3576	-931223		-392.669	14261800							8.25721	6.96371e-12	8.25721	1.80931e-11
3.58	221	3.58	220							1.90324	-0.01846	1.90328	-0.00779		508	0.63124	508	0.82062		75.3944	2011190	75.3944	-2371300		-392.619	14917900							8.24519	7.67181e-12	8.24519	1.78952e-11
3.603	209	3.603	222							1.90329	-0.00275	1.90333	0.00367		506	0.63729	506	0.82804		75.4311	-4247160	75.4311	-2313090		-392.57	15443800							8.23317	6.55363e-12	8.23317	1.79596e-11
3.626	223	3.626	219							1.90334	0.00746	1.90339	0.00941		504	0.64338	504	0.83551		75.4679	-10257400	75.4679	-1403290		-392.52	15756100							8.22115	7.4787e-12	8.22115	1.83077e-11
3.649	221	3.649	220							1.90339	0.00137	1.90344	0.00446		502	0.64945	502	0.84308		75.5046	-10836700	75.5046	-1436590		-392.471	15776800							8.20913	6.62277e-12	8.20913	1.77641e-11
3.672	200	3.672	200							1.90344	-0.01147	1.90349	4.02969e-05		500	0.6555	500	0.85072		75.5414	-4280740	75.5414	-3131790		-392.421	15443500							8.19711	6.79682e-12	8.19711	1.85485e-11
3.695	210	3.695	218							1.90349	-0.01318	1.90354	-0.01354		498	0.66141	498	0.85832		75.5782	5076080	75.5782	-5105480		-392.372	14720100							8.1851	7.7195e-12	8.1851	1.81455e-11
3.718	214	3.718	228							1.90355	-0.0148	1.90359	-0.02421		496	0.66721	496	0.86598		75.6149	9975600	75.6149	-5288090		-392.322	13603700							8.17308	6.20792e-12	8.17308	1.83601e-11
3.741	209	3.741	206							1.9036	-0.02927	1.90364	-0.0133		494	0.67296	494	0.87365		75.6517	6683370	75.6517	-3172480		-392.272	12129200							8.16106	7.15206e-12	8.16106	1.63622e-11
3.764	224	3.764	218							1.90365	-0.03091	1.9037	-0.00766		492	0.67862	492	0.88133		75.6884	-1443360	75.6884	-342196		-392.223	10368800							8.14904	7.56453e-12	8.14904	1.70822e-11
3.787	220	3.787	232							1.9037	-0.01346	1.90375	-0.01868		490	0.68413	490	0.88898		75.7252	-7013350	75.7252	1258030		-392.173	8427790							8.13702	6.62754e-12	8.13702	1.72038e-11
3.81	192	3.81	212							1.90375	0.00164	1.9038	-0.01573		488	0.68947	488	0.8966		75.7619	-5434260	75.7619	1273840		-392.124	6436670							8.125	7.64082e-12	8.125	1.69248e-11
3.833	184	3.833	198							1.9038	0.00216	1.90385	-0.0012		486	0.69472	486	0.90421		75.7987	1190720	75.7987	925064		-392.074	4539320							8.11298	7.30703e-12	8.11298	1.62859e-11
3.856	200	3.856	227							1.90386	-0.00973	1.9039	0.00693		484	0.69991	484	0.91178		75.8354	6773060	75.8354	1199610		-392.025	2879810							8.10096	7.32611e-12	8.10096	1.62573e-11
3.879	192	3.879	244							1.90391	-0.02172	1.90395	0.00652		482	0.70499	482	0.91934		75.8722	7439460	75.8722	1509630		-391.975	1588600							8.08894	7.16875e-12	8.08894	1.61738e-11
3.902	199	3.902	217							1.90396	-0.02215	1.90401	-0.00558		480	0.71004	480	0.9269		75.909	4743780	75.909	445901		-391.926	769722							8.07692	7.58598e-12	8.07692	1.67508e-11
3.925	229	3.925	186							1.90401	-0.015	1.90406	-0.02099		478	0.71502	478	0.93434		75.9457	2921760	75.9457	-2265690		-391.876	490594							8.0649	6.6037e-12	8.0649	1.54919e-11
3.948	189	3.948	218							1.90406	-0.00511	1.90411	-0.03479		476	0.71997	476	0.94178		75.9825	3651630	75.9825	-4968860		-391.827	775408							8.05288	6.46065e-12	8.05288	1.65934e-11
3.971	212	3.971	240							1.90411	0.000745562	1.90416	-0.0387		474	0.72494	474	0.94921		76.0192	4183980	76.0192	-5508210		-391.777	1603020							8.04086	7.32134e-12	8.04086	1.68223e-11
3.994	206	3.994	236							1.90417	-0.00939	1.90421	-0.02799		472	0.72996	472	0.95662		76.056	698181	76.056	-3400760		-391.728	2909480							8.02885	6.82543e-12	8.02885	1.54538e-11
4.017	184	4.017	217							1.90422	-0.02805	1.90426	-0.012		470	0.73496	470	0.96404		76.0927	-7049300	76.0927	-383042		-391.678	4594990							8.01683	7.55499e-12	8.01683	1.58067e-11
4.04	186	4.04	230							1.90427	-0.0312	1.90432	0.00623		468	0.73992	468	0.97129		76.1295	-14953800	76.1295	1256230		-391.629	6534350							8.00481	7.09961e-12	8.00481	1.45478e-11
4.063	192	4.063	211							1.90432	-0.01315	1.90437	0.00736		466	0.74497	466	0.97843		76.1662	-18410400	76.1662	751296		-391.579	8589860							7.99278	7.58837e-12	7.99278	1.58257e-11
4.086	215	4.086	205							1.90437	-0.00337	1.90442	-0.00198		464	0.7501	464	0.98555		76.203	-16534600	76.203	-808994		-391.53	10625100							7.98077	6.49403e-12	7.98077	1.52631e-11
4.109	193	4.109	230							1.90442	0.00224	1.90447	0.00117		462	0.75519	462	0.99259		76.2398	-12387800	76.2398	-2035520		-391.48	12517800							7.96875	6.44396e-12	7.96875	1.48434e-11
4.132	221	4.132	232							1.90448	0.01804	1.90452	0.00403		460	0.76046	460	0.99974		76.2765	-9404360	76.2765	-2776290		-391.431	14171200							7.95673	6.26991e-12	7.95673	1.51439e-11
4.155	215	4.155	210							1.90453	0.01437	1.90457	0.00632		458	0.76589	458	1.00698		76.3133	-8180910	76.3133	-3908820		-391.381	15520900							7.94471	6.68715e-12	7.94471	1.44048e-11
4.178	188	4.178	229							1.90458	-0.00257	1.90463	0.00474		456	0.77139	456	1.01407		76.35	-6904520	76.35	-5755900		-391.332	16539100							7.93269	6.89219e-12	7.93269	1.4977e-11
4.201	200	4.201	213							1.90463	-0.00481	1.90468	0.00152		454	0.77712	454	1.02092		76.3868	-4351990	76.3868	-7098800		-391.282	17233200							7.92067	6.36528e-12	7.92067	1.49579e-11
4.224	216	4.224	239							1.90468	0.00276	1.90473	0.00371		452	0.78315	452	1.02749		76.4235	-1693950	76.4235	-6100420		-391.233	17640900							7.90865	6.91603e-12	7.90865	1.47242e-11
4.247	220	4.247	221							1.90474	0.003	1.90478	0.00741		450	0.78955	450	1.03419		76.4603	-1133130	76.4603	-2296990		-391.183	17821700							7.89663	6.55363e-12	7.89663	1.49054e-11
4.27	225	4.27	230							1.90479	-0.00386	1.90483	0.00873		448	0.79638	448	1.04125		76.497	-3256520	76.497	2451550		-391.134	17846600							7.88461	6.45588e-12	7.88461	1.45883e-11
4.293	246	4.293	211							1.90484	-0.00612	1.90488	-0.000538733		446	0.80384	446	1.04839		76.5338	-6305080	76.5338	5189160		-391.084	17786900							7.8726	5.8193e-12	7.8726	1.46742e-11
4.316	202	4.316	253							1.90489	-0.00677	1.90494	0.000963126		444	0.81205	444	1.05586		76.5706	-8047480	76.5706	4236450		-391.035	17703100							7.86058	6.17216e-12	7.86058	1.34034e-11
4.339	216	4.339	223							1.90494	-0.00845	1.90499	0.01398		442	0.82105	442	1.06359		76.6073	-7847120	76.6073	543290		-390.985	17636900							7.84856	6.38435e-12	7.84856	1.37276e-11
4.362	203	4.362	221							1.90499	-0.01211	1.90504	0.01248		440	0.83119	440	1.07179		76.6441	-6564340	76.6441	-3167340		-390.936	17605700							7.83654	6.39866e-12	7.83654	1.47791e-11
4.385	210	4.385	224							1.90505	-0.01046	1.90509	-0.00367		438	0.84271	438	1.08049		76.6808	-4861570	76.6808	-4622440		-390.886	17601300							7.82452	5.96474e-12	7.82452	1.45216e-11
4.408	213	4.408	215							1.9051	0.00651	1.90514	-0.01162		436	0.85567	436	1.09007		76.7176	-2478940	76.7176	-3625960		-390.837	17592100							7.8125	6.38674e-12	7.8125	1.42069e-11
4.431	230	4.431	235							1.90515	0.00104	1.90519	-0.00409		434	0.87028	434	1.10081		76.7543	439749	76.7543	-1830160		-390.787	17529300							7.80048	6.84927e-12	7.80048	1.476e-11
4.454	196	4.454	218							1.9052	-0.03602	1.90525	-0.00881		432	0.88652	432	1.11254		76.7911	1970800	76.7911	-1085690		-390.738	17356100							7.78846	5.31862e-12	7.78846	1.34082e-11
4.477	229	4.477	221							1.90525	-0.04126	1.9053	-0.02082		430	0.90421	430	1.12523		76.8279	-431624	76.8279	-1908730		-390.688	17017500							7.77644	6.18408e-12	7.77644	1.40805e-11
4.5	195	4.5	243							1.9053	-0.01985	1.90535	-0.01704		428	0.92313	428	1.13918		76.8646	-6728590	76.8646	-3285360		-390.639	16471600							7.76442	5.9409e-12	7.76442	1.39899e-11
4.523	212	4.523	204							1.90536	-0.01097	1.9054	0.00487		426	0.94301	426	1.1542		76.9014	-12721700	76.9014	-3775750		-390.589	15698000							7.7524	5.54274e-12	7.7524	1.29599e-11
4.546	206	4.546	229							1.90541	-0.01476	1.90545	0.01473		424	0.96372	424	1.17039		76.9381	-12882000	76.9381	-2840320		-390.54	14705200							7.74038	7.10199e-12	7.74038	1.33343e-11
4.569	214	4.569	232							1.90546	-0.0192	1.90551	-0.00237		422	0.98481	422	1.18742		76.9749	-5647490	76.9749	-1271110		-390.49	13532900							7.72836	5.37346e-12	7.72836	1.31578e-11
4.592	221	4.592	217							1.90551	-0.0055	1.90556	-0.00272		420	1.00599	420	1.20555		77.0116	4179770	77.0116	-458951		-390.441	12251300							7.71635	6.11256e-12	7.71635	1.3432e-11
4.615	215	4.615	232							1.90556	0.000456047	1.90561	0.00386		418	1.02708	418	1.22456		77.0484	9133210	77.0484	-1190310		-390.391	10955500							7.70433	6.89934e-12	7.70433	1.22638e-11
4.638	236	4.638	242							1.90562	-0.01597	1.90566	-0.00724		416	1.0479	416	1.24407		77.0851	5931730	77.0851	-2987410		-390.342	9756660							7.69231	5.75016e-12	7.69231	1.32246e-11
4.661	217	4.661	228							1.90567	-0.02263	1.90571	-0.00904		414	1.0682	414	1.26404		77.1219	-1206250	77.1219	-4494600		-390.292	8770170							7.68028	5.61426e-12	7.68028	1.23544e-11
4.684	221	4.684	234							1.90572	-0.00607	1.90576	-0.00615		412	1.08806	412	1.28391		77.1587	-4438150	77.1587	-4545640		-390.243	8102970							7.66827	6.34144e-12	7.66827	1.25546e-11
4.707	202	4.707	251							1.90577	0.0095	1.90582	-0.01634		410	1.10761	410	1.3033		77.1954	118223	77.1954	-3041900		-390.193	7840680							7.65625	5.95997e-12	7.65625	1.25046e-11
4.73	201	4.73	237							1.90582	-0.000623604	1.90587	-0.02235		408	1.1269	408	1.32248		77.2322	8522460	77.2322	-1000240		-390.144	8036690							7.64423	6.34859e-12	7.64423	1.23424e-11
4.753	187	4.753	255							1.90587	-0.00571	1.90592	-0.00404		406	1.14577	406	1.34102		77.2689	12781600	77.2689	181887		-390.094	8704310							7.63221	6.03626e-12	7.63221	1.24712e-11
4.776	225	4.776	221							1.90593	0.00351	1.90597	0.000577106		404	1.16417	404	1.35871		77.3057	8573880	77.3057	-338435		-390.045	9813070							7.62019	5.39015e-12	7.62019	1.17106e-11
4.799	207	4.799	233							1.90598	0.0016	1.90602	-0.02492		402	1.18184	402	1.37549		77.3424	-685442	77.3424	-2309030		-389.995	11289700							7.60817	4.73211e-12	7.60817	1.13101e-11
4.822	224	4.822	238							1.90603	0.00611	1.90607	-0.02643		400	1.19882	400	1.39101		77.3792	-7306150	77.3792	-4483370		-389.946	13023500							7.59615	6.6633e-12	7.59615	1.15723e-11
4.845	213	4.845	213							1.90608	0.01511	1.90613	-0.01364		398	1.2148	398	1.40489		77.4159	-6644980	77.4159	-5280710		-389.896	14876400							7.58413	5.19941e-12	7.58413	1.30148e-11
4.868	224	4.868	215							1.90613	0.01061	1.90618	-0.01644		396	1.22979	396	1.41729		77.4527	-995933	77.4527	-3743260		-389.847	16695100							7.57211	5.89321e-12	7.57211	1.13315e-11
4.891	216	4.891	228							1.90618	0.00949	1.90623	-0.02614		394	1.24341	394	1.42852		77.4895	3433390	77.4895	-349369		-389.797	18326000							7.5601	6.1364e-12	7.5601	1.29623e-11
4.914	206	4.914	214							1.90624	0.00634	1.90628	-0.02892		392	1.25509	392	1.43855		77.5262	2881780	77.5262	2924960		-389.748	19629200							7.54808	5.59519e-12	7.54808	1.07879e-11
4.937	214	4.937	243							1.90629	-0.01049	1.90633	-0.01315		390	1.26516	390	1.44668		77.563	-839713	77.563	3691300		-389.698	20491500							7.53606	6.11733e-12	7.53606	1.14817e-11
4.96	204	4.96	250							1.90634	-0.01894	1.90639	-0.00127		388	1.27342	388	1.4535		77.5997	-3166870	77.5997	945815		-389.649	20836500							7.52404	5.65956e-12	7.52404	1.08023e-11
4.983	222	4.983	232							1.90639	-0.01533	1.90644	-3.81135e-05		386	1.28032	386	1.45917		77.6365	-1960610	77.6365	-3776240		-389.599	20630600							7.51202	6.45588e-12	7.51202	1.20683e-11
5.006	216	5.006	250							1.90644	-0.00643	1.90649	0.01124		384	1.28585	384	1.4636		77.6732	604029	77.6732	-7176610		-389.55	19884400							7.5	6.30568e-12	7.5	1.15723e-11
5.029	220	5.029	261							1.9065	0.00692	1.90654	0.01017		382	1.29016	382	1.46718		77.71	1066240	77.71	-6711140		-389.5	18649900							7.48798	5.65003e-12	7.48798	1.0683e-11
5.052	219	5.052	241							1.90655	0.00535	1.90659	-0.01406		380	1.29341	380	1.47071		77.7467	-1182820	77.7467	-2871050		-389.451	17013000							7.47596	5.48075e-12	7.47596	1.12099e-11
5.075	201	5.075	231							1.9066	-0.00687	1.90664	-0.02305		378	1.29661	378	1.47339		77.7835	-3396170	77.7835	969120		-389.401	15083300							7.46394	5.41876e-12	7.46394	1.05352e-11
5.098	212	5.098	242							1.90665	-0.00367	1.9067	-0.01104		376	1.29847	376	1.47568		77.8203	-2994920	77.8203	1335880		-389.352	12982300							7.45192	5.9552e-12	7.45192	1.04422e-11
5.121	225	5.121	235							1.9067	-0.000141078	1.90675	-0.00657		374	1.30022	374	1.47785		77.857	-875617	77.857	-2286490		-389.302	10830400							7.4399	6.35336e-12	7.4399	1.00417e-11
5.144	216	5.144	211							1.90675	-0.00953	1.9068	-0.01317		372	1.30157	372	1.47967		77.8938	-510883	77.8938	-6997150		-389.253	8735600							7.42788	6.20316e-12	7.42788	1.1322e-11
5.167	230	5.167	252							1.90681	-0.01706	1.90685	-0.01839		370	1.30237	370	1.48125		77.9305	-3692420	77.9305	-9139580		-389.203	6784700							7.41586	5.00391e-12	7.41586	9.6483e-12
5.19	223	5.19	260							1.90686	-0.01219	1.9069	-0.02423		368	1.30254	368	1.48251		77.9673	-7778150	77.9673	-7554560		-389.154	5037300							7.40385	6.1817e-12	7.40385	1.04995e-11
5.213	208	5.213	223							1.90691	0.000811909	1.90696	-0.01983		366	1.30245	366	1.48306		78.004	-7928910	78.004	-4280450		-389.104	3523990							7.39183	6.55363e-12	7.39183	1.08857e-11
5.236	209	5.236	235							1.90696	0.00307	1.90701	-0.00328		364	1.30189	364	1.4836		78.0408	-2378110	78.0408	-2146190		-389.055	2248220							7.37981	5.34485e-12	7.37981	9.77467e-12
5.259	222	5.259	245							1.90701	-0.0036	1.90706	-0.000888564		362	1.30055	362	1.48347		78.0775	4858400	78.0775	-1885920		-389.005	1191560							7.36778	6.34144e-12	7.36778	8.78285e-12
5.282	229	5.282	226							1.90707	-0.01403	1.90711	-0.01715		360	1.29795	360	1.48289		78.1143	7142480	78.1143	-1812440		-388.956	321367							7.35577	5.36392e-12	7.35577	1.09048e-11
5.305	233	5.305	229							1.90712	-0.0196	1.90716	-0.02331		358	1.29557	358	1.48121		78.1511	1516940	78.1511	-244777		-388.906	-400276							7.34375	6.11494e-12	7.34375	1.05209e-11
5.328	246	5.328	248							1.90717	-0.01015	1.90721	-0.00491		356	1.29349	356	1.47931		78.1878	-8080390	78.1878	2151880		-388.857	-1007720							7.33173	5.54035e-12	7.33173	1.02491e-11
5.351	213	5.351	224							1.90722	0.00209	1.90727	0.00792		354	1.29117	354	1.47744		78.2246	-14091100	78.2246	2852630		-388.807	-1524210							7.31971	6.19124e-12	7.31971	1.09715e-11
5.374	228	5.374	241							1.90727	0.01049	1.90732	-0.00643		352	1.2891	352	1.47523		78.2613	-12082300	78.2613	355944		-388.758	-1956770							7.30769	6.95418e-12	7.30769	1.15104e-11
5.397	227	5.397	246							1.90733	0.00192	1.90737	-0.01359		350	1.28703	350	1.47271		78.2981	-4479200	78.2981	-3724580		-388.708	-2294170							7.29567	5.79308e-12	7.29567	9.15478e-12
5.42	222	5.42	243							1.90738	-0.01424	1.90742	-0.01029		348	1.28506	348	1.47066		78.3348	2172480	78.3348	-5811700		-388.659	-2508270							7.28365	5.80738e-12	7.28365	1.09e-11
5.443	224	5.443	246							1.90743	-0.01436	1.90747	-0.01747		346	1.28314	346	1.46803		78.3716	3470030	78.3716	-3732320		-388.609	-2558580							7.27163	5.35677e-12	7.27163	9.65784e-12
5.466	238	5.466	250							1.90748	-0.01051	1.90753	-0.00991		344	1.28262	344	1.46498		78.4084	719313	78.4084	1149350		-388.56	-2399270							7.25961	5.25902e-12	7.25961	1.03826e-11
5.489	219	5.489	239							1.90753	-0.01256	1.90758	-0.00071968		342	1.28146	342	1.46226		78.4451	-1376460	78.4451	5202870		-388.51	-1987750							7.2476	5.56658e-12	7.2476	9.38366e-12
5.512	211	5.512	256							1.90758	-0.01036	1.90763	-0.00286		340	1.2808	340	1.45935		78.4819	-51464.6	78.4819	5813500		-388.461	-1293560							7.23558	4.87278e-12	7.23558	9.17385e-12
5.535	236	5.535	261							1.90764	-0.01349	1.90768	0.00687		338	1.27885	338	1.45595		78.5186	2811040	78.5186	3328050		-388.411	-306190							7.22356	5.99573e-12	7.22356	9.89149e-12
5.558	252	5.558	230							1.90769	-0.01763	1.90773	0.01879		336	1.27648	336	1.45113		78.5554	3137290	78.5554	-9942.8		-388.362	959237							7.21154	5.56658e-12	7.21154	8.89013e-12
5.581	211	5.581	208							1.90774	-0.00224	1.90779	0.00818		334	1.27314	334	1.4468		78.5921	-654776	78.5921	-2531190		-388.312	2459350							7.19952	6.35574e-12	7.19952	1.01108e-11
5.604	203	5.604	234							1.90779	0.00913	1.90784	-0.01653		332	1.26837	332	1.44202		78.6289	-5813770	78.6289	-4201880		-388.263	4123550							7.1875	4.74165e-12	7.1875	9.51241e-12
5.627	224	5.627	229							1.90784	0.00693	1.90789	-0.02155		330	1.26452	330	1.43625		78.6656	-8076810	78.6656	-5474140		-388.213	5858680							7.17548	5.67387e-12	7.17548	8.91398e-12
5.65	212	5.65	231							1.9079	0.00286	1.90794	-0.00764		328	1.25962	328	1.42979		78.7024	-6034610	78.7024	-5826440		-388.164	7556890							7.16346	5.64764e-12	7.16346	9.2573e-12
5.673	224	5.673	246							1.90795	-0.01322	1.90799	-0.00348		326	1.25352	326	1.42468		78.7392	-2479300	78.7392	-4100020		-388.114	9105870							7.15144	5.31862e-12	7.15144	9.4528e-12
5.696	234	5.696	247							1.908	-0.02791	1.90805	-0.00934		324	1.24855	324	1.41867		78.7759	-1509610	78.7759	-318290		-388.065	10400300							7.13942	5.64287e-12	7.13942	8.0509e-12
5.719	239	5.719	219							1.90805	-0.01482	1.9081	-0.0108		322	1.2437	322	1.41397		78.8127	-4543620	78.8127	3381050		-388.015	11352800							7.1274	4.24574e-12	7.1274	8.79238e-12
5.742	214	5.742	255							1.9081	-0.000937245	1.90815	-0.01554		320	1.23755	320	1.40794		78.8494	-9251420	78.8494	4231960		-387.966	11903800							7.11538	5.54751e-12	7.11538	1.01394e-11
5.765	226	5.765	218							1.90816	-0.0051	1.9082	-0.02444		318	1.23147	318	1.40234		78.8862	-12166000	78.8862	1452410		-387.916	12028100							7.10336	6.02196e-12	7.10336	8.75424e-12
5.788	211	5.788	239							1.90821	-0.00288	1.90825	-0.02352		316	1.22667	316	1.39634		78.9229	-12017100	78.9229	-2814800		-387.867	11738200							7.09135	5.2614e-12	7.09135	8.8806e-12
5.811	206	5.811	274							1.90826	0.0032	1.9083	-0.00231		314	1.22327	314	1.39131		78.9597	-10453100	78.9597	-5387360		-387.817	11082600							7.07933	5.05636e-12	7.07933	8.88775e-12
5.834	239	5.834	221							1.90831	0.00184	1.90836	0.01419		312	1.21929	312	1.38729		78.9964	-9802520	78.9964	-4899080		-387.768	10141300							7.06731	6.66092e-12	7.06731	8.65172e-12
5.857	248	5.857	252							1.90836	0.00351	1.90841	-0.000146682		310	1.21697	310	1.38492		79.0332	-10488200	79.0332	-2750050		-387.718	9016990							7.05528	5.16604e-12	7.05528	8.04375e-12
5.88	217	5.88	254							1.90841	0.00401	1.90846	-0.01688		308	1.21507	308	1.38149		79.07	-10715500	79.07	-1353530		-387.668	7823330							7.04327	6.12209e-12	7.04327	8.02706e-12
5.903	237	5.903	263							1.90847	-0.00884	1.90851	-0.01421		306	1.21415	306	1.37927		79.1067	-8494950	79.1067	-1703070		-387.619	6673080							7.03125	6.07918e-12	7.03125	8.9855e-12
5.926	219	5.926	208							1.90852	-0.02365	1.90856	-0.0043		304	1.21248	304	1.3768		79.1435	-3823630	79.1435	-2766830		-387.569	5665730							7.01923	5.97427e-12	7.01923	8.00322e-12
5.949	226	5.949	262							1.90857	-0.01797	1.90862	-0.00312		302	1.2137	302	1.37654		79.1802	1002230	79.1802	-3015340		-387.52	4877080							7.00721	4.04785e-12	7.00721	7.93646e-12
5.972	219	5.972	234							1.90862	-0.000334088	1.90867	-0.00179		300	1.2161	300	1.37754		79.217	3050140	79.217	-2120760		-387.47	4351920							6.99519	5.44737e-12	6.99519	8.4276e-12
5.995	193	5.995	235							1.90867	-0.000122984	1.90872	-0.00161		298	1.21926	298	1.37918		79.2537	906830	79.2537	-1002540		-387.421	4100440							6.98317	5.83122e-12	6.98317	8.59449e-12
6.018	221	6.018	239							1.90873	-0.0089	1.90877	-0.00714		296	1.22305	296	1.38128		79.2905	-4221500	79.2905	-505762		-387.371	4099060							6.97115	4.99676e-12	6.97115	6.9804e-12
6.041	218	6.041	257							1.90878	-0.00521	1.90882	0.00337		294	1.22724	294	1.38362		79.3272	-9068530	79.3272	-480805		-387.322	4295380							6.95913	5.41638e-12	6.95913	8.42045e-12
6.064	236	6.064	241							1.90883	-0.00548	1.90888	0.00911		292	1.2319	292	1.38595		79.364	-10200400	79.364	-264814		-387.272	4616750							6.94711	5.9552e-12	6.94711	7.6289e-12
6.087	207	6.087	236							1.90888	-0.01222	1.90893	-0.00938		290	1.2375	290	1.38811		79.4008	-6299650	79.4008	292547		-387.223	4981250							6.9351	4.76549e-12	6.9351	7.86017e-12
6.11	201	6.11	281							1.90893	-0.000539162	1.90898	-0.01986		288	1.24219	288	1.39189		79.4375	531828	79.4375	706527		-387.173	5309810							6.92308	4.00255e-12	6.92308	8.03183e-12
6.133	212	6.133	259							1.90899	0.01177	1.90903	-0.01064		286	1.24791	286	1.3963		79.4743	5707200	79.4743	761547		-387.124	5537830							6.91106	4.70589e-12	6.91106	6.6633e-12
6.156	240	6.156	236							1.90904	0.0029	1.90908	-0.00564		284	1.25375	284	1.40029		79.511	5299250	79.511	1102020		-387.074	5624870							6.89904	4.45555e-12	6.89904	8.18441e-12
6.179	221	6.179	255							1.90909	-0.00662	1.90914	-0.00922		282	1.25881	282	1.40286		79.5478	-652310	79.5478	2490770		-387.025	5561080							6.88702	4.21713e-12	6.88702	7.81963e-12
6.202	207	6.202	237							1.90914	-0.00146	1.90919	-0.00658		280	1.26361	280	1.40597		79.5845	-7586030	79.5845	4484930		-386.975	5369610							6.875	4.80364e-12	6.875	7.89116e-12
6.225	218	6.225	241							1.90919	0.0062	1.90924	-0.000942848		278	1.26818	278	1.4094		79.6213	-9710650	79.6213	5277870		-386.926	5104460							6.86298	4.14322e-12	6.86298	7.63605e-12
6.248	217	6.248	237							1.90925	-0.00361	1.90929	-0.00246		276	1.27308	276	1.41423		79.658	-4768260	79.658	3301790		-386.876	4844140							6.85096	5.77877e-12	6.85096	8.32985e-12
6.271	215	6.271	247							1.9093	-0.02132	1.90934	-0.00795		274	1.27709	274	1.41805		79.6948	3920030	79.6948	-911793		-386.827	4681710							6.83894	3.74506e-12	6.83894	6.72768e-12
6.294	215	6.294	233							1.90935	-0.01854	1.9094	-0.0094		272	1.27985	272	1.42406		79.7316	10196600	79.7316	-4696550		-386.777	4712480							6.82692	4.05024e-12	6.82692	7.0114e-12
6.317	220	6.317	265							1.9094	-0.00778	1.90945	-0.00562		270	1.28144	270	1.42687		79.7683	10236700	79.7683	-5362310		-386.728	5020780							6.8149	4.09077e-12	6.8149	7.22836e-12
6.34	206	6.34	221							1.90945	-0.0022	1.9095	-0.00257		268	1.28238	268	1.42869		79.8051	5400810	79.8051	-2514490		-386.678	5667500							6.80288	5.16604e-12	6.80288	7.524e-12
6.363	202	6.363	232							1.90951	0.0038	1.90955	-0.00352		266	1.28412	266	1.43129		79.8418	294347	79.8418	1646000		-386.629	6679950							6.79086	3.74745e-12	6.79086	7.36664e-12
6.386	198	6.386	230							1.90956	-0.00447	1.9096	-0.00036985		264	1.28456	264	1.43482		79.8786	-1713120	79.8786	4265430		-386.579	8045290							6.77885	5.08497e-12	6.77885	7.29511e-12
6.409	213	6.409	234							1.90961	-0.01033	1.90966	-0.00909		262	1.2862	262	1.43839		79.9153	-975670	79.9153	4090710		-386.53	9708590							6.76683	5.44737e-12	6.76683	6.71814e-12
6.432	213	6.432	237							1.90966	-0.00453	1.90971	-0.02371		260	1.28616	260	1.44229		79.9521	-20884.8	79.9521	2009380		-386.48	11575700							6.75481	4.25528e-12	6.75481	6.97563e-12
6.455	215	6.455	239							1.90971	-0.00132	1.90976	-0.0205		258	1.28403	258	1.44299		79.9889	-321585	79.9889	-268920		-386.431	13520900							6.74278	4.24097e-12	6.74278	6.65615e-12
6.478	222	6.478	241							1.90977	0.00196	1.90981	-0.01954		256	1.28083	256	1.4425		80.0256	-1172770	80.0256	-1791460		-386.381	15398600							6.73077	5.25902e-12	6.73077	7.26174e-12
6.501	226	6.501	243							1.90982	-0.00106	1.90986	-0.01093		254	1.27649	254	1.44146		80.0624	-1505750	80.0624	-2711660		-386.332	17057400							6.71875	4.95623e-12	6.71875	7.06146e-12
6.524	248	6.524	235							1.90987	-0.00861	1.90992	-0.000985069		252	1.27485	252	1.44295		80.0991	-1818330	80.0991	-3455730		-386.282	18356000							6.70673	4.8394e-12	6.70673	7.77195e-12
6.547	215	6.547	230							1.90992	-0.0116	1.90997	-0.00667		250	1.27182	250	1.44417		80.1359	-3458940	80.1359	-3909720		-386.233	19177700							6.69471	4.24336e-12	6.69471	7.27366e-12
6.57	198	6.57	262							1.90997	-0.01035	1.91002	-0.00977							80.1726	-6155720	80.1726	-3512870		-386.183	19443100							6.68269	5.27571e-12	6.68269	7.63128e-12
6.593	224	6.593	258							1.91003	-0.00381	1.91007	-0.01566							80.2094	-7326960	80.2094	-1990750		-386.134	19119400							6.67067	3.79036e-12	6.67067	6.80636e-12
6.616	227	6.616	244							1.91008	0.00506	1.91012	-0.01676							80.2461	-4789030	80.2461	164333		-386.084	18224300							6.65865	4.72258e-12	6.65865	6.94702e-12
6.639	225	6.639	239							1.91013	0.00424	1.91018	-0.00753							80.2829	-17534.5	80.2829	1951650		-386.035	16825300							6.64663	4.5533e-12	6.64663	7.14968e-12
6.662	236	6.662	243							1.91018	-0.0093	1.91023	0.00117							80.3197	2354690	80.3197	2569540		-385.985	15033300							6.63461	5.91229e-12	6.63461	6.73483e-12
6.685	218	6.685	239							1.91023	-0.0217	1.91028	-0.0054							80.3564	-797231	80.3564	1966650		-385.936	12992400							6.6226	4.87993e-12	6.6226	6.87073e-12
6.708	211	6.708	249							1.91029	-0.01166	1.91033	-0.01772							80.3932	-7062970	80.3932	873627		-385.886	10865500							6.61058	4.26958e-12	6.61058	7.14253e-12
6.731	208	6.731	257							1.91034	-0.000557256	1.91038	-0.01236							80.4299	-10097900	80.4299	319730		-385.837	8818920							6.59856	4.43409e-12	6.59856	7.1306e-12
6.754	215	6.754	250							1.91039	-0.00232	1.91044	-0.00816							80.4667	-6010150	80.4667	883577		-385.787	7006300							6.58654	4.36256e-12	6.58654	6.227e-12
6.777	217	6.777	244							1.91044	-0.00556	1.91049	-0.00387							80.5034	2025200	80.5034	2124260		-385.738	5554100							6.57452	4.4174e-12	6.57452	6.47972e-12
6.8	199	6.8	250							1.91049	-0.01936	1.91054	0.00412							80.5402	6332630	80.5402	2721520		-385.688	4550440							6.5625	3.92388e-12	6.5625	6.73245e-12
6.823	216	6.823	260							1.91055	-0.02182	1.91059	-0.00205							80.5769	2423660	80.5769	1485510		-385.639	4037800							6.55048	5.61188e-12	6.55048	7.08769e-12
6.846	239	6.846	233							1.9106	-0.01359	1.91064	-0.01153							80.6137	-6126320	80.6137	-1432020		-385.589	4010700							6.53846	3.62108e-12	6.53846	5.39015e-12
6.869	241	6.869	240							1.91065	-0.01836	1.9107	-0.01232							80.6505	-11050300	80.6505	-4318890		-385.54	4418330							6.52644	4.3578e-12	6.52644	6.8445e-12
6.892	220	6.892	249							1.9107	-0.01684	1.91075	-0.00878							80.6872	-7797500	80.6872	-5227380		-385.49	5171620							6.51442	4.85371e-12	6.51442	5.82407e-12
6.915	229	6.915	246							1.91075	-0.00787	1.9108	-0.00428							80.724	-209393	80.724	-3851130		-385.441	6154050							6.5024	3.89526e-12	6.5024	6.32237e-12
6.938	202	6.938	218							1.91081	-0.00393	1.91085	-0.00802							80.7607	3507770	80.7607	-2071340		-385.391	7234690							6.49038	4.52707e-12	6.49038	5.95997e-12
6.961	200	6.961	268							1.91086	-0.00386	1.9109	-0.02147							80.7975	-769815	80.7975	-2312470		-385.342	8282260							6.47836	4.48893e-12	6.47836	6.27707e-12
6.984	200	6.984	213							1.91091	-0.00663	1.91096	-0.02772							80.8342	-9183360	80.8342	-5074900		-385.292	9178470							6.46635	4.97768e-12	6.46635	5.69294e-12
7.007	229	7.007	244							1.91096	-0.00753	1.91101	-0.02306							80.871	-14457900	80.871	-8135080		-385.243	9829380							6.45433	4.77741e-12	6.45433	6.15309e-12
7.03	222	7.03	234							1.91101	-0.0143	1.91106	-0.01893							80.9077	-13622400	80.9077	-8458950		-385.193	10173700							6.44231	4.87993e-12	6.44231	6.33906e-12
7.053	214	7.053	228							1.91107	-0.01201	1.91111	-0.01058							80.9445	-10350600	80.9445	-5111880		-385.144	10187100							6.43028	4.69635e-12	6.43028	5.79069e-12
7.076	248	7.076	283							1.91112	0.00175	1.91116	-0.00351							80.9813	-9683410	80.9813	-269080		-385.094	9882990							6.41827	4.30058e-12	6.41827	5.43306e-12
7.099	248	7.099	240							1.91117	0.000335415	1.91122	-0.0107							81.018	-11567400	81.018	2744630		-385.045	9308590							6.40625	3.84758e-12	6.40625	6.54171e-12
7.122	216	7.122	271							1.91122	-0.00465	1.91127	-0.00881							81.0548	-10890700	81.0548	2433600		-384.995	8538580							6.39423	3.57817e-12	6.39423	6.43442e-12
7.145	219	7.145	250							1.91128	-0.01073	1.91132	-0.00511							81.0915	-4101120	81.0915	170114		-384.946	7666010							6.38221	4.62959e-12	6.38221	5.55227e-12
7.168	219	7.168	214							1.91133	-0.02033	1.91137	-0.02331							81.1283	5329640	81.1283	-1559770		-384.896	6792130							6.37019	3.22054e-12	6.37019	5.46167e-12
7.191	225	7.191	238							1.91138	-0.01658	1.91142	-0.03772							81.165	9386960	81.165	-1643660		-384.847	6016140							6.35817	4.14799e-12	6.35817	5.14696e-12
7.214	241	7.214	257							1.91143	-0.0133	1.91148	-0.03079							81.2018	3854210	81.2018	-953144		-384.797	5426060							6.34615	4.25289e-12	6.34615	6.20316e-12
7.237	211	7.237	241							1.91148	-0.01899	1.91153	-0.01709							81.2385	-6501950	81.2385	-760147		-384.748	5091430							6.33413	3.09418e-12	6.33413	5.59042e-12
7.26	227	7.26	220							1.91154	-0.00828	1.91158	-0.00358							81.2753	-11977600	81.2753	-1076480		-384.698	5058470							6.32211	5.0063e-12	6.32211	6.46303e-12
7.283	229	7.283	259							1.91159	0.01268	1.91163	0.00376							81.3121	-7432720	81.3121	-860338		-384.649	5348000							6.3101	4.64628e-12	6.3101	5.70009e-12
7.306	226	7.306	246							1.91164	0.00943	1.91169	-0.00276							81.3488	2586610	81.3488	379637		-384.599	5955820							6.29808	4.35064e-12	6.29808	5.95043e-12
7.329	216	7.329	230							1.91169	-0.00611	1.91174	-0.01111							81.3856	8509820	81.3856	1738610		-384.55	6855360							6.28606	3.61393e-12	6.28606	5.96474e-12
7.352	211	7.352	259							1.91174	-0.00725	1.91179	-0.01535							81.4223	5362560	81.4223	1942860		-384.5	8001870							6.27404	3.07034e-12	6.27404	4.59622e-12
7.375	200	7.375	251							1.9118	-0.0013	1.91184	-0.02068							81.4591	-2573240	81.4591	939412		-384.451	9337440							6.26202	5.25902e-12	6.26202	5.27571e-12
7.398	220	7.398	240							1.91185	0.00754	1.91189	-0.01746							81.4958	-6621950	81.4958	-34387.5		-384.401	10796200							6.25	3.99063e-12	6.25	6.56794e-12
7.421	222	7.421	246							1.9119	0.02256	1.91195	-0.00305							81.5326	-2736820	81.5326	-91193.2		-384.352	12308900							6.23798	4.51992e-12	6.23798	5.46883e-12
7.444	239	7.444	190							1.91195	0.01937	1.912	-0.00164							81.5694	4670210	81.5694	12283.7		-384.302	13806800							6.22596	3.31829e-12	6.22596	4.96576e-12
7.467	229	7.467	269							1.912	-0.00892	1.91205	-0.01199							81.6061	7651770	81.6061	-1276410		-384.253	15224300							6.21394	4.23859e-12	6.21394	5.72155e-12
7.49	237	7.49	260							1.91206	-0.01868	1.9121	-0.01678							81.6429	2900660	81.6429	-4140750		-384.203	16500400							6.20192	3.90242e-12	6.20192	5.85745e-12
7.513	238	7.513	263							1.91211	-0.01071	1.91215	-0.00738							81.6796	-5182390	81.6796	-6581510		-384.154	17579300							6.1899	4.44363e-12	6.1899	5.10166e-12
7.536	239	7.536	244							1.91216	-0.01944	1.91221	0.0131							81.7164	-9140590	81.7164	-6270550		-384.104	18410800							6.17788	3.03696e-12	6.17788	5.50221e-12
7.559	225	7.559	246							1.91221	-0.02207	1.91226	0.01272							81.7531	-5643020	81.7531	-3214800		-384.055	18950100							6.16586	3.74029e-12	6.16586	4.88947e-12
7.582	233	7.582	232							1.91227	-0.01311	1.91231	-0.000243187							81.7899	1877640	81.7899	-121407		-384.005	19158400							6.15385	4.47462e-12	6.15385	5.55943e-12
7.605	233	7.605	226							1.91232	-0.01846	1.91236	0.00368							81.8266	7028730	81.8266	260717		-383.956	19004300							6.14183	4.34111e-12	6.14183	6.11733e-12
7.628	215	7.628	245							1.91237	-0.01628	1.91241	0.00817							81.8634	6351480	81.8634	-1930570		-383.906	18465300							6.12981	3.49711e-12	6.12981	5.13743e-12
7.651	242	7.651	262							1.91242	-0.00364	1.91247	0.00235							81.9002	1772340	81.9002	-3759090		-383.857	17531000							6.11778	4.87516e-12	6.11778	4.78933e-12
7.674	224	7.674	235							1.91247	-0.0055	1.91252	-0.00194							81.9369	-1845270	81.9369	-2650090		-383.807	16206300							6.10577	4.05501e-12	6.10577	5.13981e-12
7.697	223	7.697	220							1.91253	-0.01921	1.91257	-0.000683491							81.9737	-1021870	81.9737	783266		-383.758	14514300							6.09375	3.97871e-12	6.09375	5.41876e-12
7.72	239	7.72	244							1.91258	-0.03242	1.91262	-0.00903							82.0104	3947820	82.0104	3372810		-383.708	12499300							6.08173	3.68784e-12	6.08173	4.97292e-12
7.743	224	7.743	286							1.91263	-0.02243	1.91268	-0.02181							82.0472	9796380	82.0472	2802640		-383.659	10227700							6.06971	3.24915e-12	6.06971	4.95384e-12
7.766	210	7.766	280							1.91268	-0.00108	1.91273	-0.01501							82.0839	12907100	82.0839	21206.7		-383.609	7788230							6.05769	3.83089e-12	6.05769	5.19703e-12
7.789	224	7.789	240							1.91273	-0.00398	1.91278	-0.00998							82.1207	11726500	82.1207	-1966400		-383.56	5288600							6.04567	3.71645e-12	6.04567	4.02401e-12
7.812	226	7.812	261							1.91279	-0.01443	1.91283	-0.01535							82.1574	7675630	82.1574	-1467090		-383.51	2850990							6.03365	2.89629e-12	6.03365	4.95861e-12
7.835	246	7.835	270							1.91284	-0.01112	1.91288	-0.01814							82.1942	4133240	82.1942	206881		-383.461	604599							6.02163	3.55433e-12	6.02163	4.72735e-12
7.858	229	7.858	251							1.91289	-0.000521067	1.91294	-0.01936							82.231	3906280	82.231	541256		-383.411	-1323280							6.00961	3.9048e-12	6.00961	6.32952e-12
7.881	228	7.881	267							1.91294	0.00279	1.91299	-0.02043							82.2677	6756410	82.2677	-1109700		-383.362	-2817310							5.99759	4.4031e-12	5.99759	5.32339e-12
7.904	233	7.904	274							1.913	-0.01189	1.91304	-0.02666							82.3045	9196620	82.3045	-2823020		-383.312	-3784260							5.98558	4.65105e-12	5.98558	4.18137e-12
7.927	226	7.927	271							1.91305	-0.01506	1.91309	-0.01521							82.3412	7435030	82.3412	-2577250		-383.263	-4162130							5.97356	2.88675e-12	5.97356	5.18988e-12
7.95	209	7.95	245							1.9131	-0.00959	1.91315	-0.000225092							82.378	1318560	82.378	-925283		-383.213	-3927360							5.96154	3.92864e-12	5.96154	4.03593e-12
7.973	206	7.973	230							1.91315	-0.01837	1.9132	-0.00976							82.4147	-4662880	82.4147	-596522		-383.164	-3099020							5.94952	3.7999e-12	5.94952	4.57476e-12
7.996	236	7.996	286							1.9132	-0.01567	1.91325	-0.01492							82.4515	-5121750	82.4515	-3301990		-383.114	-1739470							5.9375	4.51992e-12	5.9375	4.62721e-12
8.019	232	8.019	256							1.91326	-0.00773	1.9133	-0.01018							82.4882	721444	82.4882	-7343350		-383.065	48832							5.92548	3.75221e-12	5.92548	4.36733e-12
8.042	236	8.042	270							1.91331	-0.00674	1.91335	-0.00762							82.525	7344820	82.525	-8886920		-383.015	2130440							5.91346	4.47224e-12	5.91346	5.03252e-12
8.065	231	8.065	258							1.91336	-0.00673	1.91341	-0.00585							82.5618	7519760	82.5618	-5739110		-382.965	4347180							5.90144	2.86768e-12	5.90144	4.23144e-12
8.088	230	8.088	251							1.91341	-0.00893	1.91346	-0.00883							82.5985	-694323	82.5985	338019		-382.916	6530830							5.88942	2.88675e-12	5.88942	6.00765e-12
8.111	231	8.111	268							1.91346	-0.01199	1.91351	-0.01728							82.6353	-11507000	82.6353	5197960		-382.866	8517120							5.8774	4.1456e-12	5.8774	3.43512e-12
8.134	252	8.134	249							1.91352	-0.01384	1.91356	-0.01676							82.672	-16416700	82.672	6081030		-382.817	10159500							5.86538	4.25289e-12	5.86538	5.06828e-12
8.157	239	8.157	264							1.91357	-0.01287	1.91361	0.0012							82.7088	-12083900	82.7088	3737830		-382.767	11341600							5.85336	4.73211e-12	5.85336	3.96202e-12
8.18	221	8.18	272							1.91362	-0.01363	1.91367	0.01139							82.7455	-3258910	82.7455	1046330		-382.718	11986600							5.84135	3.50426e-12	5.84135	4.58906e-12
8.203	238	8.203	249							1.91367	-0.00996	1.91372	-0.01021							82.7823	2200270	82.7823	-19127.3		-382.668	12063500							5.82933	3.47803e-12	5.82933	4.50562e-12
8.226	244	8.226	272							1.91373	-0.00214	1.91377	-0.02819							82.819	1084270	82.819	150698		-382.619	11588800							5.81731	3.40651e-12	5.81731	3.89288e-12
8.249	232	8.249	297							1.91378	0.0077	1.91382	-0.01167							82.8558	-2626200	82.8558	-27223.1		-382.569	10623500							5.80529	2.88437e-12	5.80529	4.0407e-12
8.272	235	8.272	274							1.91383	0.01883	1.91388	0.00139							82.8926	-2876880	82.8926	-1353060		-382.52	9266430							5.79327	2.89152e-12	5.79327	4.66059e-12
8.295	254	8.295	254							1.91388	0.0131	1.91393	-0.000773965							82.9293	1382970	82.9293	-3311910		-382.47	7644160							5.78125	3.99302e-12	5.78125	4.03116e-12
8.318	251	8.318	278							1.91393	-0.00306	1.91398	-0.00719							82.9661	4908530	82.9661	-5118840		-382.421	5898360							5.76923	3.71407e-12	5.76923	4.22667e-12
8.341	250	8.341	290							1.91399	-0.0099	1.91403	-0.01272							83.0028	2115430	83.0028	-6651850		-382.371	4172370							5.75721	4.01209e-12	5.75721	3.9048e-12
8.364	231	8.364	291							1.91404	-0.01411	1.91408	-0.00966							83.0396	-6159080	83.0396	-8129540		-382.322	2598180							5.74519	3.47326e-12	5.74519	4.15753e-12
8.387	194	8.387	269							1.91409	-0.02248	1.91414	-0.01174							83.0763	-12565700	83.0763	-9281780		-382.272	1285070							5.73317	3.02504e-12	5.73317	3.82851e-12
8.41	217	8.41	303							1.91414	-0.02407	1.91419	-0.00516							83.1131	-10300000	83.1131	-9421360		-382.223	311124							5.72115	4.08123e-12	5.72115	4.51992e-12
8.433	254	8.433	277							1.9142	-0.01236	1.91424	0.000203149							83.1499	-163741	83.1499	-8450660		-382.173	-281747							5.70913	3.44465e-12	5.70913	4.12415e-12
8.456	212	8.456	255							1.91425	-0.00381	1.91429	-0.01521							83.1866	9699440	83.1866	-7346970		-382.124	-488791							5.69711	2.95828e-12	5.69711	3.65685e-12
8.479	208	8.479	250							1.9143	-0.01139	1.91435	-0.02454							83.2234	11293100	83.2234	-7155880		-382.074	-339655							5.68509	3.51856e-12	5.68509	3.96441e-12
8.502	231	8.502	281							1.91435	-0.02308	1.9144	-0.02424							83.2601	4107820	83.2601	-7505790		-382.025	107762							5.67308	3.83328e-12	5.67308	4.31488e-12
8.525	237	8.525	268							1.91441	-0.02	1.91445	-0.01464							83.2969	-4771990	83.2969	-6594620		-381.975	775885							5.66106	3.12756e-12	5.66106	3.94533e-12
8.548	232	8.548	294							1.91446	-0.01922	1.9145	0.000185054							83.3336	-7564420	83.3336	-3078150		-381.926	1577440							5.64904	4.15276e-12	5.64904	3.95487e-12
8.571	226	8.571	287							1.91451	-0.02875	1.91456	0.00573							83.3704	-2758020	83.3704	2058880		-381.876	2425670							5.63702	3.9048e-12	5.63702	4.57476e-12
8.594	238	8.594	277							1.91456	-0.02115	1.91461	-0.00233							83.4071	4313500	83.4071	5887340		-381.827	3243550							5.625	3.58055e-12	5.625	4.03116e-12
8.617	217	8.617	307							1.91461	-0.01212	1.91466	-0.02159							83.4439	7123800	83.4439	6080770		-381.777	3971190							5.61298	3.78559e-12	5.61298	4.35303e-12
8.64	217	8.64	288							1.91467	-0.01505	1.91471	-0.02112							83.4807	3870940	83.4807	3082110		-381.728	4570530							5.60096	2.94397e-12	5.60096	3.68069e-12
8.663	197	8.663	283							1.91472	-0.02093	1.91476	0.00652							83.5174	-1777370	83.5174	-386836		-381.678	5027190							5.58894	3.73791e-12	5.58894	4.53661e-12
8.686	261	8.686	297							1.91477	-0.02309	1.91482	0.01738							83.5542	-4966780	83.5542	-1958260		-381.629	5349310							5.57692	2.44806e-12	5.57692	3.73314e-12
8.709	211	8.709	299							1.91482	-0.01889	1.91487	0.00724							83.5909	-4197460	83.5909	-1640670		-381.579	5563850							5.5649	2.34793e-12	5.5649	4.30296e-12
8.732	235	8.732	279							1.91488	-0.01927	1.91492	0.00511							83.6277	-1941460	83.6277	-1261720		-381.53	5710980							5.55288	2.59827e-12	5.55288	3.86665e-12
8.755	279	8.755	272							1.91493	-0.01985	1.91497	-0.00528							83.6644	-1557580	83.6644	-2215520		-381.48	5837390							5.54086	3.08703e-12	5.54086	3.45181e-12
8.778	261	8.778	300							1.91498	-0.01939	1.91503	-0.01805							83.7012	-4094980	83.7012	-4086980		-381.431	5989460							5.52885	3.53048e-12	5.52885	4.29581e-12
8.801	270	8.801	303							1.91503	-0.01405	1.91508	-0.01301							83.7379	-7900910	83.7379	-5464380		-381.381	6207050							5.51683	2.53628e-12	5.51683	4.0407e-12
8.824	269	8.824	271							1.91508	-0.00815	1.91513	-0.0079							83.7747	-10673900	83.7747	-5669640		-381.332	6518900							5.50481	3.72837e-12	5.50481	4.42217e-12
8.847	246	8.847	274							1.91514	-0.01637	1.91518	-0.00449							83.8115	-11419300	83.8115	-5261520		-381.282	6939760							5.49279	2.77231e-12	5.49279	4.03355e-12
8.87	218	8.87	321							1.91519	-0.02692	1.91523	0.00604							83.8482	-10545700	83.8482	-4879350		-381.233	7469710							5.48077	3.27538e-12	5.48077	3.90957e-12
8.893	246	8.893	278							1.91524	-0.01796	1.91529	0.01718							83.885	-8648410	83.885	-4103500		-381.183	8095510							5.46875	3.17047e-12	5.46875	4.32919e-12
8.916	237	8.916	302							1.91529	-0.00627	1.91534	0.01581							83.9217	-5707650	83.9217	-1952020		-381.134	8793560							5.45673	2.75086e-12	5.45673	4.13368e-12
8.939	257	8.939	268							1.91535	-0.0107	1.91539	-0.00102							83.9585	-1530040	83.9585	1479080		-381.084	9533940							5.44471	3.13471e-12	5.44471	3.43273e-12
8.962	227	8.962	261							1.9154	-0.00702	1.91544	-0.01601							83.9952	3334890	83.9952	4303160		-381.035	10284900							5.43269	3.23246e-12	5.43269	3.68069e-12
8.985	237	8.985	298							1.91545	-0.00132	1.9155	-0.01454							84.032	7432390	84.032	4221080		-380.985	11016800							5.42067	3.32544e-12	5.42067	3.89288e-12
9.008	249	9.008	310							1.9155	0.00406	1.91555	-0.00535							84.0687	9255590	84.0687	756651		-380.936	11705800							5.40865	2.43614e-12	5.40865	3.78559e-12
9.031	243	9.031	326							1.91556	0.01066	1.9156	-0.00263							84.1055	8247600	84.1055	-4000320		-380.886	12335200							5.39663	2.53866e-12	5.39663	4.16229e-12
9.054	252	9.054	283							1.91561	0.00493	1.91565	-0.000954911							84.1423	5026390	84.1423	-7023070		-380.837	12896300							5.38461	3.34929e-12	5.38461	4.25289e-12
9.077	231	9.077	243							1.91566	0.000811909	1.91571	0.00728							84.179	806619	84.179	-6796850		-380.787	13386900							5.37259	2.79377e-12	5.37259	3.74268e-12
9.1	237	9.1	340							1.91571	0.00572	1.91576	0.00611							84.2158	-3256960	84.2158	-4288860		-380.738	13808800							5.36058	3.633e-12	5.36058	3.80943e-12
9.123	231	9.123	308							1.91576	0.0155	1.91581	0.00395							84.2525	-6255280	84.2525	-1760810		-380.688	14165000							5.34856	3.54241e-12	5.34856	4.45555e-12
9.146	256	9.146	305							1.91582	0.00659	1.91586	0.0114							84.2893	-7435070	84.2893	-836277		-380.639	14455800							5.33654	3.43273e-12	5.33654	2.96782e-12
9.169	245	9.169	300							1.91587	-0.0127	1.91591	0.00776							84.326	-6379500	84.326	-1610950		-380.589	14676300							5.32452	1.9307e-12	5.32452	4.58906e-12
9.192	240	9.192	297							1.91592	-0.0143	1.91597	-0.00468							84.3628	-3534940	84.3628	-3177620		-380.54	14813900							5.3125	2.89152e-12	5.3125	4.18852e-12
9.215	224	9.215	324							1.91597	-0.00354	1.91602	-0.01158							84.3995	-452415	84.3995	-4553410		-380.49	14848000							5.30048	3.08226e-12	5.30048	4.26005e-12
9.238	251	9.238	291							1.91603	0.0024	1.91607	-0.00755							84.4363	901491	84.4363	-5072090		-380.441	14751100							5.28846	3.22769e-12	5.28846	4.07408e-12
9.261	232	9.261	271							1.91608	0.000540489	1.91612	-0.00251							84.4731	-466478	84.4731	-4340320		-380.391	14491100							5.27644	2.80331e-12	5.27644	3.33975e-12
9.284	220	9.284	290							1.91613	0.00435	1.91618	0.000546948							84.5098	-3627600	84.5098	-2350730		-380.342	14035100							5.26442	3.97394e-12	5.26442	3.51618e-12
9.307	241	9.307	315							1.91618	-0.00105	1.91623	-0.0067							84.5466	-6240380	84.5466	221794		-380.292	13354500							5.2524	3.02265e-12	5.2524	3.3779e-12
9.33	262	9.33	294							1.91624	-0.01117	1.91628	-0.0201							84.5833	-6287610	84.5833	2148240		-380.243	12429400							5.24038	2.75801e-12	5.24038	4.51515e-12
9.353	254	9.353	285							1.91629	-0.000913119	1.91633	-0.00981							84.6201	-3583110	84.6201	2466920		-380.193	11253600							5.22836	3.69976e-12	5.22836	4.75357e-12
9.376	242	9.376	303							1.91634	-0.00596	1.91639	-0.00764							84.6568	308048	84.6568	1316080		-380.144	9837280							5.21635	2.83669e-12	5.21635	3.97156e-12
9.399	249	9.399	328							1.91639	-0.04125	1.91644	-0.02535							84.6936	3602730	84.6936	-165399		-380.094	8209180							5.20433	3.05603e-12	5.20433	3.3779e-12
9.422	251	9.422	309							1.91645	-0.0414	1.91649	-0.02333							84.7304	5714140	84.7304	-880837		-380.045	6416200							5.19231	2.23349e-12	5.19231	3.85235e-12
9.445	256	9.445	319							1.9165	-0.00347	1.91654	-0.0089							84.7671	7133570	84.7671	-698874		-379.995	4521260							5.18029	3.33737e-12	5.18029	4.72496e-12
9.468	204	9.468	317							1.91655	0.01468	1.9166	-0.00804							84.8039	8069620	84.8039	-311432		-379.946	2599150							5.16827	2.56727e-12	5.16827	4.00494e-12
9.491	246	9.491	293							1.9166	0.00879	1.91665	-0.00334							84.8406	7594820	84.8406	-307060		-379.896	731173							5.15625	3.41366e-12	5.15625	4.70827e-12
9.514	249	9.514	314							1.91665	0.00322	1.9167	0.01171							84.8774	4558850	84.8774	-605478		-379.847	-1001220							5.14423	2.56727e-12	5.14423	4.12653e-12
9.537	235	9.537	301							1.91671	0.00407	1.91675	-0.000472386							84.9141	-560430	84.9141	-849636		-379.797	-2522790							5.13221	2.9559e-12	5.13221	3.41366e-12
9.56	254	9.56	317							1.91676	0.000848098	1.9168	-0.01188							84.9509	-5105740	84.9509	-1086660		-379.748	-3770290							5.12019	3.60916e-12	5.12019	3.42558e-12
9.583	230	9.583	319							1.91681	-0.00674	1.91686	-0.00434							84.9876	-6149190	84.9876	-1703840		-379.698	-4697060							5.10817	4.21475e-12	5.10817	2.7747e-12
9.606	241	9.606	292							1.91686	-0.01625	1.91691	-0.01556							85.0244	-3316270	85.0244	-2622080		-379.649	-5275890							5.09615	3.11087e-12	5.09615	3.99302e-12
9.629	245	9.629	258							1.91692	-0.02595	1.91696	-0.02224							85.0612	443698	85.0612	-2883060		-379.599	-5294440							5.08413	3.1061e-12	5.08413	3.4375e-12
9.652	233	9.652	296							1.91697	-0.02767	1.91701	-0.01769							85.0979	1377030	85.0979	-1468160		-379.55	-4945630							5.07211	2.41707e-12	5.07211	4.17898e-12
9.675	225	9.675	318							1.91702	-0.01629	1.91707	-0.02394							85.1347	-1438090	85.1347	1335690		-379.5	-4281930							5.06009	2.55535e-12	5.06009	3.55433e-12
9.698	224	9.698	284							1.91707	-0.00572	1.91712	-0.02861							85.1714	-5010480	85.1714	3632860		-379.451	-3345100							5.04808	3.70215e-12	5.04808	3.41843e-12
9.721	237	9.721	297							1.91713	-0.00387	1.91717	-0.01697							85.2082	-5274680	85.2082	3342020		-379.401	-2184930							5.03606	2.94159e-12	5.03606	4.05262e-12
9.744	236	9.744	312							1.91718	0.000878256	1.91722	-0.00268							85.2449	-1217290	85.2449	109092		-379.352	-854655							5.02404	3.41128e-12	5.02404	3.32068e-12
9.767	232	9.767	278							1.91723	-0.00481	1.91728	0.00107							85.2817	3865810	85.2817	-4223490		-379.302	593072							5.01202	3.15617e-12	5.01202	5.06352e-12
9.79	233	9.79	291							1.91728	-0.0104	1.91733	0.00747							85.3184	5390020	85.3184	-7129740		-379.253	2109050							5	3.41843e-12	5	3.23246e-12
9.813	257	9.813	320							1.91734	-0.00503	1.91738	0.00398							85.3552	1859890	85.3552	-7425180		-379.203	3649110							4.98798	3.10372e-12	4.98798	3.35644e-12
9.836	264	9.836	297							1.91739	-0.00907	1.91743	-0.00669							85.392	-3730390	85.392	-5901690		-379.154	5174190							4.97596	3.0155e-12	4.97596	3.18955e-12
9.859	235	9.859	306							1.91744	-0.01158	1.91749	-0.00371							85.4287	-6786580	85.4287	-4214150		-379.104	6649280							4.96394	2.36223e-12	4.96394	2.5625e-12
9.882	235	9.882	288							1.91749	-0.00816	1.91754	-0.00107							85.4655	-5297840	85.4655	-3386160		-379.055	8041490							4.95192	2.67933e-12	4.95192	3.03457e-12
9.905	236	9.905	315							1.91755	-0.01069	1.91759	0.00648							85.5022	-1210070	85.5022	-3354880		-379.005	9317880							4.9399	3.7999e-12	4.9399	4.55568e-12
9.928	248	9.928	275							1.9176	-0.01417	1.91764	0.01654							85.539	2004050	85.539	-3554960		-378.956	10443600							4.92788	2.47429e-12	4.92788	3.80228e-12
9.951	271	9.951	318							1.91765	-0.01424	1.9177	0.00748							85.5757	2702210	85.5757	-3493590		-378.906	11380800							4.91586	2.6388e-12	4.91586	3.60201e-12
9.974	245	9.974	328							1.9177	-0.01798	1.91775	-0.00588							85.6125	1934090	85.6125	-2745310		-378.857	12089500							4.90385	3.13948e-12	4.90385	3.34213e-12
9.997	245	9.997	320							1.91776	-0.02457	1.9178	-0.00209							85.6492	1444000	85.6492	-903958		-378.807	12528900							4.89183	2.82e-12	4.89183	3.53525e-12
10.02	265	10.02	293							1.91781	-0.03	1.91785	0.00879							85.686	1501950	85.686	1890030		-378.758	12661000							4.87981	3.81659e-12	4.87981	3.77367e-12
10.043	267	10.043	307							1.91786	-0.02961	1.91791	0.00559							85.7228	988594	85.7228	4346140		-378.708	12455700							4.86779	2.28117e-12	4.86779	4.23144e-12
10.066	254	10.066	317							1.91791	-0.02482	1.91796	0.000709801							85.7595	-769940	85.7595	4532760		-378.659	11895100							4.85577	3.0012e-12	4.85577	3.11087e-12
10.089	273	10.089	309							1.91796	-0.02483	1.91801	0.00823							85.7963	-2918210	85.7963	1652720		-378.609	10979400							4.84375	2.98689e-12	4.84375	3.9358e-12
10.112	251	10.112	305							1.91802	-0.02454	1.91806	0.01054							85.833	-4060310	85.833	-2562300		-378.56	9730330							4.83173	3.5877e-12	4.83173	3.3016e-12
10.135	256	10.135	319							1.91807	-0.01942	1.91812	0.000136802							85.8698	-3935300	85.8698	-4732790		-378.51	8193530							4.81971	2.36462e-12	4.81971	3.61393e-12
10.158	241	10.158	311							1.91812	-0.01351	1.91817	-0.00157							85.9065	-3557580	85.9065	-2751340		-378.461	6438560							4.80769	2.89391e-12	4.80769	3.88811e-12
10.181	257	10.181	291							1.91817	-0.01294	1.91822	0.00534							85.9433	-3633290	85.9433	1934480		-378.411	4555700							4.79567	2.58396e-12	4.79567	3.09656e-12
10.204	255	10.204	312							1.91823	-0.01573	1.91827	-0.00533							85.98	-3376010	85.98	5216870		-378.361	2650220							4.78365	3.0012e-12	4.78365	3.57817e-12
10.227	278	10.227	338							1.91828	-0.01704	1.91833	-0.01304							86.0168	-1459720	86.0168	3928720		-378.312	834039							4.77163	1.98315e-12	4.77163	3.54479e-12
10.25	234	10.25	316							1.91833	-0.01913	1.91838	-0.01314							86.0536	1886620	86.0536	-1211130		-378.262	-784261							4.75961	2.92252e-12	4.75961	4.07885e-12
10.273	247	10.273	313							1.91838	-0.00586	1.91843	-0.0174							86.0903	4357840	86.0903	-6241190		-378.213	-2110210							4.7476	2.9249e-12	4.7476	3.84997e-12
10.296	287	10.296	332							1.91844	0.01847	1.91848	-0.01845							86.1271	3718160	86.1271	-7599390		-378.163	-3073710							4.73558	2.62211e-12	4.73558	3.53764e-12
10.319	280	10.319	342							1.91849	0.00985	1.91854	-0.02363							86.1638	441636	86.1638	-5179170		-378.114	-3637520							4.72356	2.69602e-12	4.72356	3.06318e-12
10.342	262	10.342	300							1.91854	-0.01995	1.91859	-0.01808							86.2006	-2323000	86.2006	-1911070		-378.064	-3802790							4.71154	3.21577e-12	4.71154	3.30637e-12
10.365	281	10.365	304							1.91859	-0.02461	1.91864	-0.0036							86.2373	-1866380	86.2373	-603953		-378.015	-3610800							4.69952	1.57068e-12	4.69952	3.56386e-12
10.388	280	10.388	337							1.91865	-0.00959	1.91869	0.00576							86.2741	1084320	86.2741	-1445700		-377.965	-3140310							4.6875	2.97497e-12	4.6875	3.75937e-12
10.411	280	10.411	316							1.9187	-0.00578	1.91875	0.01546							86.3109	2919520	86.3109	-2526200		-377.916	-2500660							4.67548	2.59588e-12	4.67548	3.38505e-12
10.434	276	10.434	335							1.91875	-0.01155	1.9188	0.02058							86.3476	982863	86.3476	-2344270		-377.866	-1820920							4.66346	1.72089e-12	4.66346	3.59247e-12
10.457	246	10.457	344							1.9188	-0.01296	1.91885	0.00961							86.3844	-3288190	86.3844	-1311820		-377.817	-1236280							4.65144	2.76516e-12	4.65144	3.66638e-12
10.48	255	10.48	307							1.91886	-0.0081	1.9189	-0.00825							86.4211	-5414430	86.4211	-765402		-377.767	-872950							4.63942	3.36836e-12	4.63942	4.46508e-12
10.503	246	10.503	356							1.91891	-0.00238	1.91896	-0.01638							86.4579	-2267040	86.4579	-999655		-377.718	-833352							4.6274	2.82953e-12	4.6274	3.35882e-12
10.526	237	10.526	335							1.91896	-0.00825	1.91901	-0.01241							86.4946	4655080	86.4946	-843979		-377.668	-1183190							4.61538	1.57784e-12	4.61538	3.21816e-12
10.549	243	10.549	339							1.91901	-0.00871	1.91906	-0.00959							86.5314	10462300	86.5314	717602		-377.619	-1942100							4.60336	2.82953e-12	4.60336	3.11087e-12
10.572	281	10.572	344							1.91907	-0.00114	1.91911	-0.01861							86.5681	11396800	86.5681	2930780		-377.569	-3079080							4.59135	2.41707e-12	4.59135	3.2873e-12
10.595	280	10.595	330							1.91912	-0.0029	1.91917	-0.0196							86.6049	8099200	86.6049	3752760		-377.52	-4513480							4.57933	1.49916e-12	4.57933	3.56386e-12
10.618	276	10.618	337							1.91917	-0.00552	1.91922	-0.000556828							86.6417	4485410	86.6417	2043240		-377.47	-6121750							4.56731	2.62211e-12	4.56731	3.21816e-12
10.641	266	10.641	329							1.91922	-0.00375	1.91927	0.00371							86.6784	3597170	86.6784	-997699		-377.421	-7749320							4.55529	2.98451e-12	4.55529	3.89765e-12
10.664	267	10.664	348							1.91928	-0.00325	1.91932	-0.00773							86.7152	4663750	86.7152	-2839660		-377.371	-9226610							4.54327	2.65549e-12	4.54327	3.69022e-12
10.687	287	10.687	309							1.91933	-0.00622	1.91938	-0.00244							86.7519	4118850	86.7519	-2049960		-377.322	-10387400							4.53125	3.211e-12	4.53125	3.40174e-12
10.71	300	10.71	312							1.91938	-0.00622	1.91943	-0.00254							86.7887	-675993	86.7887	445620		-377.272	-11087900							4.51923	1.98792e-12	4.51923	2.8343e-12
10.733	264	10.733	333							1.91943	-0.00747	1.91948	-0.01861							86.8254	-8633980	86.8254	2502880		-377.223	-11223300							4.50721	2.61019e-12	4.50721	2.8343e-12
10.756	267	10.756	338							1.91949	-0.01079	1.91953	-0.0269							86.8622	-15468700	86.8622	2889850		-377.173	-10741900							4.49519	2.28356e-12	4.49519	2.79139e-12
10.779	271	10.779	374							1.91954	-0.01163	1.91959	-0.01957							86.8989	-16808400	86.8989	2080360		-377.124	-9652680							4.48317	3.11325e-12	4.48317	3.27061e-12
10.802	281	10.802	349							1.91959	-0.00777	1.91964	0.00372							86.9357	-11240800	86.9357	1120560		-377.074	-8026980							4.47115	2.20965e-12	4.47115	3.92864e-12
10.825	290	10.825	363							1.91964	-0.00588	1.91969	0.02385							86.9725	-1195270	86.9725	218349		-377.025	-5993300							4.45913	2.64357e-12	4.45913	2.74609e-12
10.848	260	10.848	351							1.9197	-0.0139	1.91974	0.01949							87.0092	8566160	87.0092	-1176100		-376.975	-3725480							4.44711	2.56012e-12	4.44711	3.3016e-12
10.871	300	10.871	366							1.91975	-0.01064	1.9198	0.0024							87.046	13669500	87.046	-3056710		-376.926	-1425660							4.4351	2.8343e-12	4.4351	4.18137e-12
10.894	287	10.894	342							1.9198	-0.00278	1.91985	-0.00776							87.0827	12510500	87.0827	-4211900		-376.876	696397							4.42308	2.90821e-12	4.42308	3.14663e-12
10.917	279	10.917	311							1.91985	0.00329	1.9199	-0.01205							87.1195	7034440	87.1195	-3355690		-376.827	2445370							4.41106	2.16435e-12	4.41106	4.10984e-12
10.94	269	10.94	315							1.91991	0.01405	1.91995	-0.02179							87.1562	1381250	87.1562	-864637		-376.777	3661240							4.39904	2.93921e-12	4.39904	3.62347e-12
10.963	285	10.963	329							1.91996	0.0051	1.92001	-0.02865							87.193	-902551	87.193	1069920		-376.728	4236850							4.38702	2.66264e-12	4.38702	3.65685e-12
10.986	274	10.986	340							1.92001	-0.00947	1.92006	-0.02222							87.2297	820393	87.2297	438200		-376.678	4129930							4.375	3.28491e-12	4.375	4.05024e-12
11.009	262	11.009	347							1.92006	-0.00204	1.92011	-0.01155							87.2665	4286190	87.2665	-2397650		-376.629	3368170							4.36298	1.45863e-12	4.36298	3.39697e-12
11.032	236	11.032	345							1.92012	-0.000406467	1.92016	-0.00655							87.3033	6684170	87.3033	-4765260		-376.579	2046750							4.35096	2.67218e-12	4.35096	3.19193e-12
11.055	270	11.055	351							1.92017	-0.01213	1.92022	-0.00313							87.34	7185960	87.34	-4177920		-376.53	318416							4.33894	1.27266e-12	4.33894	4.2362e-12
11.078	285	11.078	349							1.92022	-0.00519	1.92027	-0.00404							87.3768	7221290	87.3768	-816002		-376.48	-1622980							4.32692	3.33737e-12	4.32692	3.17524e-12
11.101	277	11.101	352							1.92028	0.0109	1.92032	-0.00833							87.4135	8350350	87.4135	2557720		-376.431	-3563530							4.3149	2.67218e-12	4.3149	4.03116e-12
11.124	269	11.124	330							1.92033	0.00521	1.92037	-0.01133							87.4503	10161700	87.4503	3197380		-376.381	-5292790							4.30288	2.46952e-12	4.30288	3.76652e-12
11.147	275	11.147	321							1.92038	-0.01844	1.92043	-0.01266							87.487	10626200	87.487	883751		-376.332	-6627060							4.29086	2.35746e-12	4.29086	2.95828e-12
11.17	293	11.17	356							1.92043	-0.02285	1.92048	-0.00127							87.5238	8564570	87.5238	-2081880		-376.282	-7429830							4.27885	2.45045e-12	4.27885	2.9249e-12
11.193	271	11.193	358							1.92049	-0.01065	1.92053	0.00203							87.5605	5368270	87.5605	-3194960		-376.233	-7627070							4.26683	2.71748e-12	4.26683	3.1967e-12
11.216	275	11.216	336							1.92054	-0.01512	1.92058	-0.00746							87.5973	3813280	87.5973	-1928660		-376.183	-7215610							4.25481	2.28356e-12	4.25481	3.54479e-12
11.239	235	11.239	308							1.92059	-0.02128	1.92064	-0.00687							87.6341	5112940	87.6341	251989		-376.134	-6263550							4.24279	3.18716e-12	4.24279	3.32783e-12
11.262	300	11.262	331							1.92064	-0.01047	1.92069	-0.01196							87.6708	7517120	87.6708	1664780		-376.084	-4902640							4.23077	1.41571e-12	4.23077	2.82238e-12
11.285	286	11.285	345							1.9207	-0.00257	1.92074	-0.01583							87.7076	8156890	87.7076	1886100		-376.035	-3313390							4.21875	2.93921e-12	4.21875	3.36359e-12
11.308	312	11.308	368							1.92075	-0.0095	1.92079	-0.00697							87.7443	6136130	87.7443	1528760		-375.985	-1704600							4.20673	3.60201e-12	4.20673	4.05024e-12
11.331	277	11.331	322							1.9208	-0.01344	1.92085	-0.000357786							87.7811	3346440	87.7811	987224		-375.936	-289431							4.19471	2.398e-12	4.19471	3.51856e-12
11.354	264	11.354	331							1.92085	-0.00164	1.9209	0.01497							87.8178	2041600	87.8178	-144281		-375.886	739164							4.18269	2.40276e-12	4.18269	3.3779e-12
11.377	295	11.377	369							1.92091	0.01426	1.92095	0.02131							87.8546	2014390	87.8546	-2300650		-375.837	1230950							4.17067	1.95692e-12	4.17067	3.4232e-12
11.4	287	11.4	367							1.92096	0.00414	1.921	0.00988							87.8914	807768	87.8914	-4881470		-375.787	1096340							4.15865	2.83192e-12	4.15865	4.03355e-12
11.423	273	11.423	347							1.92101	-0.0183	1.92106	-0.00293							87.9281	-3101910	87.9281	-6344370		-375.738	317680							4.14663	3.12994e-12	4.14663	2.32409e-12
11.446	283	11.446	334							1.92106	-0.01495	1.92111	-0.02307							87.9649	-7843530	87.9649	-5544380		-375.688	-1047420							4.13461	3.02265e-12	4.13461	4.06216e-12
11.469	304	11.469	351							1.92112	0.000787783	1.92116	-0.03646							88.0016	-9555400	88.0016	-2913160		-375.639	-2871080							4.1226	1.32988e-12	4.1226	2.87483e-12
11.492	284	11.492	354							1.92117	0.00428	1.92122	-0.03401							88.0384	-6464850	88.0384	-173238		-375.589	-4968040							4.11058	2.20488e-12	4.11058	4.03832e-12
11.515	285	11.515	352							1.92122	-0.00345	1.92127	-0.02606							88.0751	-1204840	88.0751	1146770		-375.54	-7114900							4.09856	2.16435e-12	4.09856	2.71748e-12
11.538	308	11.538	337							1.92127	-0.01663	1.92132	-0.01764							88.1119	1397690	88.1119	869042		-375.49	-9073740							4.08654	2.91775e-12	4.08654	4.02401e-12
11.561	292	11.561	350							1.92133	-0.02637	1.92137	-0.01717							88.1486	-1069450	88.1486	-96715.4		-375.441	-10617500							4.07452	2.50767e-12	4.07452	2.97735e-12
11.584	297	11.584	333							1.92138	-0.02033	1.92143	-0.02627							88.1854	-6403360	88.1854	-944650		-375.391	-11554300							4.0625	3.09418e-12	4.0625	3.69976e-12
11.607	328	11.607	369							1.92143	-0.01731	1.92148	-0.01156							88.2222	-10217700	88.2222	-1669610		-375.342	-11748000							4.05048	2.61973e-12	4.05048	3.67354e-12
11.63	293	11.63	352							1.92149	-0.01962	1.92153	0.01341							88.2589	-10257500	88.2589	-2574010		-375.292	-11132800							4.03846	2.56727e-12	4.03846	3.2563e-12
11.653	302	11.653	416							1.92154	-0.01003	1.92158	0.01792							88.2957	-8015940	88.2957	-3370350		-375.243	-9720640							4.02644	3.22769e-12	4.02644	3.54479e-12
11.676	274	11.676	387							1.92159	-0.0079	1.92164	0.0226							88.3324	-6296390	88.3324	-3156620		-375.193	-7600130							4.01442	2.24302e-12	4.01442	2.56727e-12
11.699	309	11.699	389							1.92164	-0.01763	1.92169	0.01658							88.3692	-5862040	88.3692	-1462170		-375.144	-4927360							4.0024	1.58022e-12	4.0024	3.35405e-12
11.722	284	11.722	327							1.9217	-0.02266	1.92174	-0.01133							88.4059	-5011230	88.4059	838105		-375.094	-1910050							3.99038	2.6984e-12	3.99038	3.01788e-12
11.745	291	11.745	338							1.92175	-0.02268	1.92179	-0.02754							88.4427	-2254080	88.4427	1988990		-375.045	1213650							3.97836	2.70317e-12	3.97836	3.42558e-12
11.768	288	11.768	359							1.9218	-0.01556	1.92185	-0.00919							88.4794	1342290	88.4794	969381		-374.995	4199160							3.96635	2.71986e-12	3.96635	4.43648e-12
11.791	332	11.791	388							1.92185	-0.01036	1.9219	0.0019							88.5162	2994840	88.5162	-1375520		-374.946	6819590							3.95433	1.25836e-12	3.95433	3.02742e-12
11.814	286	11.814	393							1.92191	-0.01439	1.92195	-0.01222							88.553	1216970	88.553	-3004350		-374.896	8887520							3.94231	2.57443e-12	3.94231	3.03219e-12
11.837	306	11.837	374							1.92196	-0.01194	1.922	-0.01986							88.5897	-2514120	88.5897	-2636350		-374.847	10272200							3.93029	1.80195e-12	3.93029	3.59486e-12
11.86	332	11.86	386							1.92201	-0.01987	1.92206	-0.02492							88.6265	-5251210	88.6265	-1038160		-374.797	10910200							3.91827	2.68171e-12	3.91827	2.67218e-12
11.883	314	11.883	349							1.92206	-0.03857	1.92211	-0.02748							88.6632	-5369260	88.6632	-258244		-374.748	10809300							3.90625	2.70317e-12	3.90625	3.54241e-12
11.906	335	11.906	384							1.92212	-0.03874	1.92216	-0.01927							88.7	-3554660	88.7	-1527060		-374.698	10043900							3.89423	3.02981e-12	3.89423	3.42796e-12
11.929	311	11.929	414							1.92217	-0.02831	1.92222	-0.00864							88.7367	-1348760	88.7367	-3982160		-374.649	8745220							3.88221	1.50869e-12	3.88221	4.25528e-12
11.952	327	11.952	405							1.92222	-0.01756	1.92227	-0.0078							88.7735	492477	88.7735	-5571960		-374.599	7084580							3.87019	1.8544e-12	3.87019	3.44465e-12
11.975	344	11.975	369							1.92228	-0.00764	1.92232	-0.00725							88.8102	1805160	88.8102	-5208090		-374.55	5254430							3.85817	2.54343e-12	3.85817	2.88437e-12
11.998	355	11.998	396							1.92233	-0.00619	1.92237	-0.000538733							88.847	1826190	88.847	-3877400		-374.5	3447690							3.84615	2.46237e-12	3.84615	3.28014e-12
12.021	351	12.021	370							1.92238	0.00347	1.92243	-0.0045							88.8838	-611773	88.8838	-3494740		-374.451	1838410							3.83413	2.30263e-12	3.83413	2.72701e-12
12.044	336	12.044	393							1.92243	0.01816	1.92248	-0.01067							88.9205	-5093260	88.9205	-4707050		-374.401	565456							3.82211	1.85679e-12	3.82211	3.45657e-12
12.067	326	12.067	401							1.92249	0.00392	1.92253	-0.01992							88.9573	-8454560	88.9573	-6054830		-374.352	-278861							3.8101	3.10848e-12	3.8101	3.33498e-12
12.09	308	12.09	430							1.92254	-0.013	1.92258	-0.02822							88.994	-6890850	88.994	-5499860		-374.302	-654565							3.79808	2.34554e-12	3.79808	2.51244e-12
12.113	321	12.113	416							1.92259	-0.0078	1.92264	-0.01494							89.0308	28406.7	89.0308	-2753080		-374.253	-573661							3.78606	1.67559e-12	3.78606	3.38743e-12
12.136	336	12.136	390							1.92264	0.00325	1.92269	-0.000574923							89.0675	7858950	89.0675	144158		-374.203	-94241							3.77404	2.65787e-12	3.77404	2.53389e-12
12.159	318	12.159	413							1.9227	0.00833	1.92274	0.00547							89.1043	10809800	89.1043	760092		-374.154	690010							3.76202	1.92593e-12	3.76202	3.01312e-12
12.182	356	12.182	425							1.92275	-0.00192	1.9228	-0.00103							89.141	7360480	89.141	-1215050		-374.104	1663310							3.75	2.39084e-12	3.75	3.664e-12
12.205	349	12.205	403							1.9228	-0.017	1.92285	-0.01653							89.1778	2098750	89.1778	-3574080		-374.055	2702560							3.73798	2.70794e-12	3.73798	2.45045e-12
12.228	325	12.228	419							1.92285	-0.01752	1.9229	-0.01257							89.2146	1359890	89.2146	-3852380		-374.005	3691540							3.72596	2.92729e-12	3.72596	3.34929e-12
12.251	357	12.251	403							1.92291	-0.01091	1.92295	-0.00647							89.2513	6840090	89.2513	-1934420		-373.956	4532940							3.71394	1.4777e-12	3.71394	3.82136e-12
12.274	350	12.274	412							1.92296	-0.01189	1.92301	-0.00427							89.2881	13855100	89.2881	-218993		-373.906	5156880							3.70192	2.7294e-12	3.70192	3.03219e-12
12.297	376	12.297	395							1.92301	-0.0108	1.92306	0.000124739							89.3248	16206800	89.3248	-1058850		-373.857	5525230							3.6899	2.5029e-12	3.6899	3.81897e-12
12.32	349	12.32	415							1.92307	-0.00339	1.92311	-0.00857							89.3616	12558100	89.3616	-4100340		-373.807	5631600							3.67788	1.5826e-12	3.67788	3.59247e-12
12.343	344	12.343	402							1.92312	-0.00211	1.92316	-0.01673							89.3983	7537160	89.3983	-6358820		-373.757	5497200							3.66586	2.15481e-12	3.66586	3.21577e-12
12.366	346	12.366	422							1.92317	-0.000870898	1.92322	-0.01467							89.4351	6497460	89.4351	-5075340		-373.708	5163720							3.65385	3.31114e-12	3.65385	2.60542e-12
12.389	366	12.389	447							1.92322	0.00408	1.92327	-0.00936							89.4719	9744910	89.4719	-500424		-373.658	4684230							3.64183	2.60304e-12	3.64183	3.52095e-12
12.412	355	12.412	470							1.92328	-0.000738203	1.92332	-0.0098							89.5086	12525400	89.5086	4211360		-373.609	4113680							3.62981	2.21203e-12	3.62981	2.69364e-12
12.435	373	12.435	465							1.92333	-0.00135	1.92338	-0.01874							89.5454	10608000	89.5454	5871480		-373.559	3500270							3.61779	1.42286e-12	3.61779	3.05126e-12
12.458	411	12.458	469							1.92338	0.00537	1.92343	-0.0175							89.5821	5104450	89.5821	4005930		-373.51	2878970							3.60577	4.01209e-12	3.60577	2.9106e-12
12.481	388	12.481	466							1.92343	-0.00269	1.92348	-0.00529							89.6189	1119010	89.6189	855105		-373.46	2267900							3.59375	2.31932e-12	3.59375	3.27538e-12
12.504	372	12.504	474							1.92349	-0.01289	1.92353	-0.00264							89.6556	1805920	89.6556	-1105970		-373.411	1668080							3.58173	2.70556e-12	3.58173	2.89391e-12
12.527	388	12.527	472							1.92354	-0.01335	1.92359	-0.00153							89.6924	4571600	89.6924	-1434510		-373.361	1066280							3.56971	1.62314e-12	3.56971	2.91298e-12
12.55	389	12.55	467							1.92359	-0.02	1.92364	0.00619							89.7291	3756360	89.7291	-1587030		-373.312	440544							3.55769	2.66026e-12	3.55769	2.5935e-12
12.573	393	12.573	456							1.92365	-0.02243	1.92369	0.0088							89.7659	-3096560	89.7659	-2882150		-373.262	-232747							3.54567	2.98927e-12	3.54567	3.87381e-12
12.596	385	12.596	430							1.9237	-0.01059	1.92374	0.00689							89.8027	-12244500	89.8027	-4940320		-373.213	-971294							3.53365	1.25836e-12	3.53365	2.73893e-12
12.619	380	12.619	458							1.92375	-0.00449	1.9238	0.00347							89.8394	-17257600	89.8394	-6176080		-373.163	-1780110							3.52163	2.6841e-12	3.52163	3.08941e-12
12.642	446	12.642	493							1.9238	-0.0054	1.92385	-0.00659							89.8762	-15201300	89.8762	-5550910		-373.114	-2646660							3.50961	2.32409e-12	3.50961	2.85814e-12
12.665	377	12.665	472							1.92386	-0.00334	1.9239	-0.00813							89.9129	-8953870	89.9129	-3561040		-373.064	-3538770							3.4976	2.33124e-12	3.4976	3.74506e-12
12.688	428	12.688	487							1.92391	-0.00587	1.92396	0.01374							89.9497	-3582540	89.9497	-1537540		-373.015	-4405770							3.48558	2.35031e-12	3.48558	2.90583e-12
12.711	451	12.711	482							1.92396	-0.01649	1.92401	0.02791							89.9864	-1133550	89.9864	-297653		-372.965	-5182820							3.47356	1.70897e-12	3.47356	4.51515e-12
12.734	442	12.734	516							1.92402	-0.01514	1.92406	0.01071							90.0232	487830	90.0232	279423		-372.916	-5798020							3.46154	2.0952e-12	3.46154	3.47803e-12
12.757	416	12.757	464							1.92407	-0.00276	1.92411	-0.01082							90.0599	3810140	90.0599	514345		-372.866	-6181370							3.44952	2.81761e-12	3.44952	3.39935e-12
12.78	486	12.78	515							1.92412	0.00212	1.92417	-0.01984							90.0967	7924510	90.0967	235352		-372.817	-6274510							3.4375	2.47667e-12	3.4375	3.52095e-12
12.803	463	12.803	514							1.92417	-0.00483	1.92422	-0.03062							90.1335	9000180	90.1335	-861495		-372.767	-6039850							3.42548	1.65651e-12	3.42548	3.59724e-12
12.826	459	12.826	532							1.92423	-0.02345	1.92427	-0.03574							90.1702	4548030	90.1702	-2305800		-372.718	-5467790							3.41346	3.09418e-12	3.41346	2.75562e-12
12.849	479	12.849	510							1.92428	-0.02914	1.92432	-0.01173							90.207	-3448160	90.207	-2778660		-372.668	-4581150							3.40144	1.62552e-12	3.40144	3.43512e-12
12.872	443	12.872	527							1.92433	-0.01912	1.92438	0.0037							90.2437	-10060500	90.2437	-1319990		-372.619	-3435910							3.38942	2.77947e-12	3.38942	3.26346e-12
12.895	510	12.895	492							1.92438	-0.02037	1.92443	-0.01821							90.2805	-11955600	90.2805	1398050		-372.569	-2118000							3.3774	2.47191e-12	3.3774	2.91298e-12
12.918	481	12.918	533							1.92444	-0.02416	1.92448	-0.02807							90.3172	-10145900	90.3172	3302150		-372.52	-736536							3.36538	2.0356e-12	3.36538	2.7294e-12
12.941	489	12.941	492							1.92449	-0.00954	1.92454	-0.02324							90.354	-8310270	90.354	2701160		-372.47	586045							3.35336	2.47191e-12	3.35336	4.06216e-12
12.964	480	12.964	566							1.92454	0.000100184	1.92459	-0.01637							90.3907	-8803910	90.3907	-81341.6		-372.421	1725730							3.34135	2.21918e-12	3.34135	3.10848e-12
12.987	468	12.987	494							1.9246	-0.02048	1.92464	-0.00277							90.4275	-10583600	90.4275	-2902110		-372.371	2569280							3.32933	1.90924e-12	3.32933	3.8595e-12
13.01	486	13.01	505							1.92465	-0.03306	1.92469	-0.00185							90.4643	-10796500	90.4643	-3655550		-372.322	3025650							3.31731	2.22633e-12	3.31731	2.6984e-12
13.033	498	13.033	504							1.9247	-0.01767	1.92475	-0.00991							90.501	-7850670	90.501	-1965340		-372.272	3035410							3.30529	1.99984e-12	3.30529	3.37551e-12
13.056	489	13.056	499							1.92475	-0.00312	1.9248	-0.01317							90.5378	-2697330	90.5378	823330		-372.223	2576690							3.29327	2.78662e-12	3.29327	2.76278e-12
13.079	540	13.079	523							1.92481	0.0112	1.92485	-0.01239							90.5745	2511230	90.5745	3050930		-372.173	1667260							3.28125	1.82579e-12	3.28125	3.00835e-12
13.102	476	13.102	513							1.92486	0.02175	1.92491	-0.02077							90.6113	6412630	90.6113	3943740		-372.124	362406							3.26923	1.98076e-12	3.26923	2.77708e-12
13.125	493	13.125	504							1.92491	0.01082	1.92496	-0.03081							90.648	8952540	90.648	3557450		-372.074	-1251160							3.25721	2.09759e-12	3.25721	3.90719e-12
13.148	510	13.148	532							1.92497	-0.01037	1.92501	-0.02759							90.6848	10441800	90.6848	2002380		-372.025	-3064570							3.24519	1.17014e-12	3.24519	3.33021e-12
13.171	523	13.171	513							1.92502	-0.02262	1.92506	-0.02383							90.7215	10758500	90.7215	-803793		-371.975	-4958050							3.23317	2.54105e-12	3.23317	3.60439e-12
13.194	478	13.194	543							1.92507	-0.0221	1.92512	-0.01757							90.7583	9666540	90.7583	-4511540		-371.926	-6812980							3.22115	2.59827e-12	3.22115	2.40992e-12
13.217	479	13.217	472							1.92512	-0.01939	1.92517	-0.001							90.7951	7551460	90.7951	-7792020		-371.876	-8523160							3.20913	2.14527e-12	3.20913	3.62824e-12
13.24	514	13.24	540							1.92518	-0.01868	1.92522	-0.00305							90.8318	5396560	90.8318	-8872780		-371.827	-10004000							3.19711	2.70794e-12	3.19711	2.74847e-12
13.263	528	13.263	527							1.92523	-0.01322	1.92528	-0.01563							90.8686	3962120	90.8686	-6897860		-371.777	-11199000							3.1851	2.62211e-12	3.1851	3.40174e-12
13.286	505	13.286	519							1.92528	-0.00467	1.92533	-0.00178							90.9053	3219380	90.9053	-2782390		-371.728	-12081500							3.17308	1.43717e-12	3.17308	2.99881e-12
13.309	511	13.309	546							1.92534	-0.00396	1.92538	0.00825							90.9421	2696210	90.9421	1360500		-371.678	-12654400							3.16106	2.09997e-12	3.16106	3.49234e-12
13.332	494	13.332	509							1.92539	-0.00672	1.92543	-0.00291							90.9788	2137900	90.9788	3703450		-371.629	-12944400							3.14904	1.85679e-12	3.14904	2.94874e-12
13.355	488	13.355	519							1.92544	-0.00524	1.92549	-0.00311							91.0156	1525200	91.0156	3730440		-371.579	-12994800							3.13702	2.31217e-12	3.13702	3.38982e-12
13.378	509	13.378	538							1.92549	-0.01046	1.92554	0.00336							91.0524	520257	91.0524	2054370		-371.53	-12856500							3.125	1.97361e-12	3.125	3.8905e-12
13.401	510	13.401	526							1.92555	-0.01985	1.92559	0.000209181							91.0891	-1602280	91.0891	-442135		-371.48	-12578300							3.11298	2.07852e-12	3.11298	3.45181e-12
13.424	507	13.424	487							1.9256	-0.0169	1.92565	-0.00513							91.1259	-5009850	91.1259	-3128570		-371.431	-12198700							3.10096	2.08805e-12	3.10096	4.12892e-12
13.447	558	13.447	543							1.92565	-0.00643	1.9257	-0.01586							91.1626	-8345500	91.1626	-5501670		-371.381	-11740100							3.08894	2.71509e-12	3.08894	2.26687e-12
13.47	506	13.47	553							1.92571	-0.0015	1.92575	-0.02003							91.1994	-9243180	91.1994	-6978780		-371.332	-11205400							3.07692	1.00563e-12	3.07692	3.49234e-12
13.493	480	13.493	491							1.92576	0.000685246	1.9258	-0.000387944							91.2361	-6359540	91.2361	-7138180		-371.282	-10579000							3.0649	1.58976e-12	3.0649	3.25869e-12
13.516	509	13.516	514							1.92581	-0.00135	1.92586	0.01434							91.2729	-1016670	91.2729	-6155770		-371.233	-9830780							3.05288	2.13812e-12	3.05288	1.93308e-12
13.539	498	13.539	521							1.92586	-0.01205	1.92591	0.00354							91.3096	3485480	91.3096	-4772390		-371.183	-8923050							3.04086	2.77947e-12	3.04086	3.50426e-12
13.562	485	13.562	534							1.92592	-0.01144	1.92596	-0.00842							91.3464	4573780	91.3464	-3661520		-371.134	-7819900							3.02885	2.25018e-12	3.02885	4.26243e-12
13.585	501	13.585	511							1.92597	-0.00189	1.92602	-0.01068							91.3832	2575250	91.3832	-2864620		-371.084	-6496760							3.01683	1.21544e-12	3.01683	2.96543e-12
13.608	520	13.608	529							1.92602	0.00178	1.92607	-0.01518							91.4199	133200	91.4199	-1957630		-371.035	-4949510							3.00481	1.17252e-12	3.00481	2.24302e-12
13.631	456	13.631	492							1.92608	0.0011	1.92612	-0.01375							91.4567	-616543	91.4567	-748794		-370.985	-3201500							2.99279	2.28356e-12	2.99279	3.4232e-12
13.654	477	13.654	510							1.92613	-0.000279804	1.92617	-0.00399							91.4934	-250220	91.4934	349460		-370.936	-1307240							2.98077	1.82341e-12	2.98077	2.01414e-12
13.677	490	13.677	522							1.92618	-0.01051	1.92623	-0.0046							91.5302	-1343490	91.5302	731367		-370.886	647792							2.96875	3.01312e-12	2.96875	3.38266e-12
13.7	504	13.7	514							1.92623	-0.02473	1.92628	-0.0104							91.5669	-5485950	91.5669	258516		-370.837	2551750							2.95673	2.45283e-12	2.95673	3.38743e-12
13.723	469	13.723	531							1.92629	-0.01812	1.92633	-0.00714							91.6037	-10996200	91.6037	-688796		-370.787	4274950							2.94471	1.92831e-12	2.94471	2.56727e-12
13.746	503	13.746	524							1.92634	-0.01594	1.92639	-0.00668							91.6404	-13704700	91.6404	-1832510		-370.738	5681760							2.93269	3.42558e-12	2.93269	2.91775e-12
13.769	524	13.769	514							1.92639	-0.026	1.92644	-0.00887							91.6772	-10296400	91.6772	-3412050		-370.688	6644440							2.92067	1.75427e-12	2.92067	3.26822e-12
13.792	481	13.792	493							1.92645	-0.02871	1.92649	-0.00161							91.714	-1365810	91.714	-5685340		-370.639	7057490							2.90865	9.00728e-13	2.90865	2.8796e-12
13.815	485	13.815	497							1.9265	-0.02682	1.92654	0.00444							91.7507	8408570	91.7507	-8010170		-370.589	6850840							2.89663	2.57443e-12	2.89663	3.60439e-12
13.838	479	13.838	524							1.92655	-0.02188	1.9266	0.00212							91.7875	13182300	91.7875	-8782800		-370.54	6000230							2.88461	2.36939e-12	2.88461	3.46373e-12
13.861	461	13.861	527							1.9266	-0.02013	1.92665	0.00257							91.8242	9844270	91.8242	-6746980		-370.49	4533490							2.8726	1.85917e-12	2.8726	1.91401e-12
13.884	452	13.884	484							1.92666	-0.01047	1.9267	0.00138							91.861	217109	91.861	-2555150		-370.441	2531690							2.86058	2.30978e-12	2.86058	3.45181e-12
13.907	484	13.907	491							1.92671	0.00371	1.92676	-0.00941							91.8977	-9878090	91.8977	1167850		-370.391	124928							2.84856	1.43479e-12	2.84856	4.05739e-12
13.93	476	13.93	506							1.92676	-0.00456	1.92681	-0.01644							91.9345	-14157000	91.9345	1705250		-370.342	-2517180							2.83654	2.25256e-12	2.83654	2.70794e-12
13.953	458	13.953	486							1.92682	-0.00897	1.92686	-0.01148							91.9712	-9896000	91.9712	-1494820		-370.292	-5199340							2.82452	2.66502e-12	2.82452	3.18478e-12
13.976	491	13.976	480							1.92687	-0.000876929	1.92692	-0.00594							92.008	111994	92.008	-6319880		-370.243	-7717610							2.8125	1.12723e-12	2.8125	2.54343e-12
13.999	490	13.999	484							1.92692	-0.00941	1.92697	-0.000502544							92.0448	9180050	92.0448	-9773530		-370.193	-9877780							2.80048	2.46714e-12	2.80048	2.83907e-12
14.022	482	14.022	513							1.92698	-0.01992	1.92702	0.00257							92.0815	11178600	92.0815	-10364700		-370.144	-11513300							2.78846	2.19534e-12	2.78846	3.10372e-12
14.045	455	14.045	529							1.92703	-0.01827	1.92707	-0.01005							92.1183	4865860	92.1183	-8911470		-370.094	-12500900							2.77644	2.00222e-12	2.77644	2.53866e-12
14.068	446	14.068	522							1.92708	-0.01517	1.92713	-0.02682							92.155	-5167910	92.155	-7219970		-370.045	-12772200							2.76442	1.49677e-12	2.76442	2.90583e-12
14.091	454	14.091	512							1.92713	-0.0179	1.92718	-0.03532							92.1918	-11886200	92.1918	-6172530		-369.995	-12320300							2.7524	2.13097e-12	2.7524	3.69738e-12
14.114	501	14.114	497							1.92719	-0.02068	1.92723	-0.02628							92.2285	-11024100	92.2285	-5149260		-369.946	-11200200							2.74038	2.38131e-12	2.74038	2.76993e-12
14.137	455	14.137	460							1.92724	-0.02055	1.92729	-0.01336							92.2653	-4012160	92.2653	-3151180		-369.896	-9523570							2.72836	2.33362e-12	2.72836	3.38266e-12
14.16	463	14.16	501							1.92729	-0.01336	1.92734	-0.01062							92.302	3659480	92.302	-238413		-369.847	-7447890							2.71635	2.15958e-12	2.71635	3.29445e-12
14.183	495	14.183	494							1.92735	-0.00148	1.92739	-0.0031							92.3388	7017630	92.3388	2274050		-369.797	-5161370							2.70433	1.11769e-12	2.70433	2.56966e-12
14.206	465	14.206	487							1.9274	-0.00216	1.92744	4.63285e-05							92.3756	5104470	92.3756	3003220		-369.748	-2865120							2.69231	2.55774e-12	2.69231	3.7999e-12
14.229	523	14.229	465							1.92745	-0.01107	1.9275	-0.01237							92.4123	664028	92.4123	1797690		-369.698	-754318							2.68029	1.95215e-12	2.68029	3.54002e-12
14.252	503	14.252	450							1.9275	-0.02106	1.92755	-0.02509							92.4491	-3061470	92.4491	-130199		-369.649	999687							2.66827	1.57784e-12	2.66827	3.43512e-12
14.275	433	14.275	467							1.92756	-0.03998	1.9276	-0.01181							92.4858	-5053090	92.4858	-1296170		-369.599	2264540							2.65625	2.15958e-12	2.65625	1.96407e-12
14.298	471	14.298	488							1.92761	-0.04103	1.92766	0.0033							92.5226	-6380100	92.5226	-1185070		-369.55	2957940							2.64423	2.18104e-12	2.64423	3.26107e-12
14.321	471	14.321	475							1.92766	-0.01691	1.92771	-0.00775							92.5593	-7998370	92.5593	-547303		-369.5	3053590							2.63221	2.67695e-12	2.63221	3.19193e-12
14.344	447	14.344	479							1.92772	0.00404	1.92776	-0.02252							92.5961	-9248280	92.5961	-578739		-369.451	2581550							2.62019	2.26925e-12	2.62019	4.43648e-12
14.367	485	14.367	477							1.92777	0.01114	1.92782	-0.02406							92.6329	-8703730	92.6329	-1742680		-369.401	1623200							2.60817	1.72327e-12	2.60817	2.93444e-12
14.39	473	14.39	501							1.92782	-0.000635667	1.92787	-0.00845							92.6696	-6236460	92.6696	-3220150		-369.352	301421							2.59615	2.52913e-12	2.59615	2.76278e-12
14.413	446	14.413	495							1.92788	-0.01179	1.92792	0.01008							92.7064	-3775180	92.7064	-3469020		-369.302	-1232730							2.58413	2.6984e-12	2.58413	3.211e-12
14.436	446	14.436	462							1.92793	-0.0221	1.92797	0.00929							92.7431	-3684390	92.7431	-1549870		-369.253	-2815510							2.57211	1.945e-12	2.57211	3.16809e-12
14.459	497	14.459	494							1.92798	-0.02834	1.92803	-0.00184							92.7799	-6329280	92.7799	1766660		-369.203	-4286410							2.5601	2.13574e-12	2.5601	3.61155e-12
14.482	467	14.482	468							1.92803	-0.01742	1.92808	-0.00408							92.8166	-9387180	92.8166	4128300		-369.154	-5502990							2.54808	2.86291e-12	2.54808	2.84145e-12
14.505	461	14.505	462							1.92809	-0.01143	1.92813	-0.01256							92.8534	-9774760	92.8534	3196010		-369.104	-6353170							2.53606	2.33839e-12	2.53606	3.02265e-12
14.528	440	14.528	468							1.92814	-0.01293	1.92819	-0.02164							92.8901	-6450530	92.8901	-1309440		-369.054	-6763820							2.52404	1.33703e-12	2.52404	3.45419e-12
14.551	444	14.551	503							1.92819	-0.00806	1.92824	-0.00851							92.9269	-1466110	92.9269	-6837880		-369.005	-6705200							2.51202	2.35508e-12	2.51202	2.55774e-12
14.574	431	14.574	482							1.92825	-0.000786456	1.92829	0.00262							92.9637	1698330	92.9637	-9528340		-368.955	-6190800							2.5	3.55433e-12	2.5	3.02504e-12
14.597	492	14.597	483							1.9283	-0.00162	1.92835	-0.00686							93.0004	970308	93.0004	-7131750		-368.906	-5273110							2.48798	1.33942e-12	2.48798	3.64254e-12
14.62	434	14.62	488							1.92835	-0.00585	1.9284	-0.0127							93.0372	-2807030	93.0372	-971139		-368.856	-4035880							2.47596	2.20011e-12	2.47596	1.92593e-12
14.643	445	14.643	434							1.92841	-0.01602	1.92845	-0.01012							93.0739	-6837550	93.0739	4911180		-368.807	-2583900							2.46394	1.18445e-12	2.46394	3.70691e-12
14.666	437	14.666	450							1.92846	-0.01767	1.9285	-0.0079							93.1107	-8718300	93.1107	6901460		-368.757	-1031620							2.45192	2.73178e-12	2.45192	3.68307e-12
14.689	441	14.689	466							1.92851	-0.00418	1.92856	-0.01115							93.1474	-8057040	93.1474	4601930		-368.708	508402							2.4399	2.04275e-12	2.4399	2.11905e-12
14.712	477	14.712	499							1.92856	-0.00587	1.92861	-0.01516							93.1842	-6183500	93.1842	824872		-368.658	1935700							2.42788	1.7638e-12	2.42788	3.0012e-12
14.735	458	14.735	479							1.92862	-0.01638	1.92866	-0.00346							93.2209	-4587400	93.2209	-1109420		-368.609	3170150							2.41586	2.19772e-12	2.41586	3.56386e-12
14.758	463	14.758	521							1.92867	-0.01538	1.92872	0.00921							93.2577	-3692070	93.2577	-211050		-368.559	4157380							2.40385	1.85679e-12	2.40385	3.07034e-12
14.781	495	14.781	492							1.92872	-0.00948	1.92877	0.00875							93.2945	-2973370	93.2945	1760820		-368.51	4871150							2.39183	1.4181e-12	2.39183	2.66026e-12
14.804	462	14.804	462							1.92878	-0.01324	1.92882	0.00515							93.3312	-2017110	93.3312	2420890		-368.46	5312650							2.37981	3.39935e-12	2.37981	3.01073e-12
14.827	415	14.827	456							1.92883	-0.01561	1.92888	-0.00436							93.368	-1268740	93.368	1139160		-368.411	5507100							2.36779	2.06898e-12	2.36779	3.13709e-12
14.85	407	14.85	474							1.92888	-0.00681	1.92893	-0.01421							93.4047	-1675810	93.4047	-621131		-368.361	5498330							2.35577	2.80331e-12	2.35577	2.70556e-12
14.873	477	14.873	483							1.92894	-0.01159	1.92898	-0.01112							93.4415	-3610860	93.4415	-1082710		-368.312	5341940							2.34375	1.86632e-12	2.34375	2.29786e-12
14.896	486	14.896	468							1.92899	-0.01432	1.92904	-0.00723							93.4782	-6194940	93.4782	-33884.9		-368.262	5098100							2.33173	2.52913e-12	2.33173	2.66502e-12
14.919	432	14.919	496							1.92904	0.000594773	1.92909	-0.00161							93.515	-7732370	93.515	1090770		-368.213	4824500							2.31971	1.84963e-12	2.31971	1.95931e-12
14.942	445	14.942	428							1.9291	0.00578	1.92914	-0.00021906							93.5517	-6873940	93.5517	829507		-368.163	4570470							2.30769	2.15719e-12	2.30769	2.81046e-12
14.965	465	14.965	454							1.92915	0.01366	1.92919	-0.00413							93.5885	-3461580	93.5885	-773379		-368.114	4372560							2.29567	2.05229e-12	2.29567	2.17865e-12
14.988	479	14.988	482							1.9292	0.01812	1.92925	-0.00224							93.6253	1582080	93.6253	-2234040		-368.064	4251830							2.28365	2.39561e-12	2.28365	3.15855e-12
15.011	477	15.011	457							1.92925	-0.00423	1.9293	-0.00886							93.662	6959020	93.662	-2084370		-368.015	4213180							2.27163	2.11905e-12	2.27163	2.89868e-12
15.034	437	15.034	451							1.92931	-0.02478	1.92935	-0.01775							93.6988	11455400	93.6988	-211125		-367.965	4246250							2.25961	2.67456e-12	2.25961	2.82715e-12
15.057	434	15.057	416							1.92936	-0.02881	1.92941	-0.01705							93.7355	13863600	93.7355	2109010		-367.916	4327860							2.2476	1.71612e-12	2.2476	2.67218e-12
15.08	425	15.08	460							1.92941	-0.02613	1.92946	-0.01005							93.7723	12960900	93.7723	3319100		-367.866	4425380							2.23558	2.75562e-12	2.23558	2.1858e-12
15.103	448	15.103	488							1.92947	-0.02046	1.92951	-0.007							93.809	8206620	93.809	2744200		-367.817	4500660							2.22356	1.58737e-12	2.22356	3.32068e-12
15.126	441	15.126	468							1.92952	-0.01716	1.92957	-0.00947							93.8458	816581	93.8458	922566		-367.767	4514020							2.21154	1.79003e-12	2.21154	3.57817e-12
15.149	448	15.149	469							1.92957	-0.01947	1.92962	-0.01223							93.8826	-6076970	93.8826	-929645		-367.718	4428010							2.19952	1.35849e-12	2.19952	2.24779e-12
15.172	477	15.172	498							1.92963	-0.01726	1.92967	-0.01763							93.9193	-9041270	93.9193	-1761870		-367.668	4210390							2.1875	1.49201e-12	2.1875	2.22395e-12
15.195	527	15.195	466							1.92968	-0.01646	1.92972	-0.01573							93.9561	-6857520	93.9561	-1269670		-367.619	3836520							2.17548	2.72463e-12	2.17548	2.04991e-12
15.218	483	15.218	453							1.92973	-0.01442	1.92978	-0.00856							93.9928	-1733370	93.9928	64215.1		-367.569	3290740							2.16346	2.13574e-12	2.16346	3.00596e-12
15.241	437	15.241	466							1.92979	0.00101	1.92983	0.0032							94.0296	2238020	94.0296	1431050		-367.52	2567030							2.15144	2.64357e-12	2.15144	3.27061e-12
15.264	449	15.264	482							1.92984	0.00656	1.92988	0.00348							94.0663	2355230	94.0663	2330710		-367.47	1668980							2.13942	1.86155e-12	2.13942	2.06421e-12
15.287	460	15.287	468							1.92989	0.00365	1.92994	-0.00946							94.1031	-542939	94.1031	2862770		-367.421	609201							2.1274	2.68648e-12	2.1274	3.08226e-12
15.31	450	15.31	442							1.92994	0.00155	1.92999	-0.000599049							94.1398	-3108350	94.1398	3353370		-367.371	-591611							2.11538	2.97258e-12	2.11538	2.58635e-12
15.333	436	15.333	458							1.93	-0.00118	1.93004	0.00841							94.1766	-2794600	94.1766	3638370		-367.322	-1905730							2.10336	1.9307e-12	2.10336	2.98451e-12
15.356	448	15.356	460							1.93005	-0.0042	1.9301	0.00078218							94.2134	-291634	94.2134	2851110		-367.272	-3299610							2.09135	2.31455e-12	2.09135	2.47667e-12
15.379	443	15.379	428							1.9301	-0.00776	1.93015	-0.00312							94.2501	1290980	94.2501	228786		-367.223	-4735050							2.07933	2.11189e-12	2.07933	2.82953e-12
15.402	444	15.402	493							1.93016	-8.67942e-05	1.9302	-0.01539							94.2869	-314283	94.2869	-3676530		-367.173	-6170390							2.06731	2.51721e-12	2.06731	2.88199e-12
15.425	471	15.425	536							1.93021	0.00476	1.93026	-0.03449							94.3236	-4081820	94.3236	-6765610		-367.124	-7561660							2.05529	2.45522e-12	2.05529	2.47667e-12
15.448	466	15.448	477							1.93026	-0.01277	1.93031	-0.03533							94.3604	-6531240	94.3604	-6832250		-367.074	-8863850							2.04327	3.08226e-12	2.04327	2.97497e-12
15.471	442	15.471	508							1.93032	-0.02771	1.93036	-0.02577							94.3971	-5065750	94.3971	-3622670		-367.025	-10032200							2.03125	2.13812e-12	2.03125	2.5482e-12
15.494	481	15.494	464							1.93037	-0.02179	1.93042	-0.01761							94.4339	-528885	94.4339	530479		-366.975	-11023900							2.01923	2.15242e-12	2.01923	3.02981e-12
15.517	487	15.517	417							1.93042	-0.0172	1.93047	-0.00986							94.4706	3525310	94.4706	2444030		-366.926	-11799200							2.00721	2.49813e-12	2.00721	2.09282e-12
15.54	446	15.54	483							1.93048	-0.0224	1.93052	-0.000647302							94.5074	4112620	94.5074	791198		-366.876	-12323800							1.99519	1.82341e-12	1.99519	2.97497e-12
15.563	438	15.563	488							1.93053	-0.02093	1.93057	0.01312							94.5442	1456130	94.5442	-2785850		-366.827	-12569900							1.98317	2.41469e-12	1.98317	3.20624e-12
15.586	480	15.586	475							1.93058	-0.01437	1.93063	0.01265							94.5809	-1496550	94.5809	-5292490		-366.777	-12518600							1.97115	1.98076e-12	1.97115	2.71509e-12
15.609	460	15.609	490							1.93064	-0.01942	1.93068	0.00126							94.6177	-2075490	94.6177	-5152560		-366.728	-12160300							1.95913	1.29412e-12	1.95913	2.72225e-12
15.632	454	15.632	470							1.93069	-0.01304	1.93073	-0.01098							94.6544	-444554	94.6544	-3401440		-366.678	-11496800							1.94711	1.89255e-12	1.94711	3.83566e-12
15.655	451	15.655	489							1.93074	0.00911	1.93079	-0.02389							94.6912	682804	94.6912	-2247350		-366.629	-10541000							1.9351	2.56489e-12	1.9351	3.08226e-12
15.678	459	15.678	497							1.93079	0.00497	1.93084	-0.02069							94.7279	-1225820	94.7279	-2690360		-366.579	-9317190							1.92308	2.61257e-12	1.92308	3.21339e-12
15.701	461	15.701	496							1.93085	-0.01708	1.93089	-0.0176							94.7647	-5983710	94.7647	-3740830		-366.53	-7860780							1.91106	1.88301e-12	1.91106	2.20726e-12
15.724	475	15.724	485							1.9309	-0.01555	1.93095	-0.01928							94.8014	-10651700	94.8014	-3867480		-366.48	-6216670							1.89904	1.81864e-12	1.89904	3.28968e-12
15.747	467	15.747	480							1.93095	-0.00629	1.931	-0.01589							94.8382	-11938000	94.8382	-2824190		-366.431	-4437890							1.88702	3.08703e-12	1.88702	2.15004e-12
15.77	478	15.77	509							1.93101	-0.00699	1.93105	-0.00574							94.875	-8837220	94.875	-1741350		-366.381	-2583570							1.875	2.17865e-12	1.875	2.92729e-12
15.793	472	15.793	436							1.93106	0.00453	1.93111	0.00556							94.9117	-3289440	94.9117	-1531560		-366.332	-716644							1.86298	2.18342e-12	1.86298	2.80092e-12
15.816	446	15.816	509							1.93111	0.01393	1.93116	-0.01004							94.9485	1499630	94.9485	-1671400		-366.282	1098440							1.85096	2.1715e-12	1.85096	2.17865e-12
15.839	500	15.839	483							1.93117	0.00579	1.93121	-0.0256							94.9852	3477690	94.9852	-918481		-366.233	2798090							1.83894	2.07375e-12	1.83894	2.11905e-12
15.862	443	15.862	469							1.93122	-0.01228	1.93127	-0.01333							95.022	2896210	95.022	879188		-366.183	4321770							1.82692	2.58158e-12	1.82692	3.04649e-12
15.885	472	15.885	479							1.93127	-0.01994	1.93132	-0.00472							95.0587	1474420	95.0587	2150330		-366.134	5614000							1.8149	1.86155e-12	1.8149	3.02742e-12
15.908	463	15.908	471							1.93133	-0.00615	1.93137	-0.00235							95.0955	590715	95.0955	1112020		-366.084	6626220							1.80288	2.82477e-12	1.80288	3.02504e-12
15.931	461	15.931	504							1.93138	-0.00296	1.93143	-0.00409							95.1322	207142	95.1322	-2160130		-366.035	7318400							1.79086	2.76278e-12	1.79086	2.1262e-12
15.954	442	15.954	476							1.93143	-0.01152	1.93148	-0.01533							95.169	-606862	95.169	-5485700		-365.985	7660460							1.77885	2.68887e-12	1.77885	2.35985e-12
15.977	478	15.977	455							1.93149	-0.0174	1.93153	-0.02103							95.2058	-2236380	95.2058	-6568130		-365.936	7633510							1.76683	2.88199e-12	1.76683	2.79854e-12
16	421	16	488							1.93154	-0.01953	1.93158	-0.02324							95.2425	-3711100	95.2425	-5117600		-365.886	7230980							1.75481	2.24541e-12	1.75481	3.72599e-12
16.023	460	16.023	485							1.93159	-0.00995	1.93164	-0.02673							95.2793	-3442220	95.2793	-2855790		-365.837	6459490							1.74279	2.60542e-12	1.74279	2.76754e-12
16.046	446	16.046	487							1.93165	-0.01223	1.93169	-0.01515							95.316	-868984	95.316	-1542160		-365.787	5339460							1.73077	1.8544e-12	1.73077	3.78082e-12
16.069	440	16.069	464							1.9317	-0.02562	1.93174	0.00246							95.3528	2639810	95.3528	-1326760		-365.738	3905430							1.71875	2.22633e-12	1.71875	2.81761e-12
16.092	489	16.092	411							1.93175	-0.02251	1.9318	0.00573							95.3895	4701710	95.3895	-1185870		-365.688	2205800							1.70673	1.00802e-12	1.70673	2.66741e-12
16.115	462	16.115	472							1.9318	-0.01175	1.93185	-0.00871							95.4263	3983450	95.4263	-646939		-365.639	301995							1.69471	2.98927e-12	1.69471	3.00596e-12
16.138	473	16.138	502							1.93186	-0.01483	1.9319	-0.01897							95.4631	1498060	95.4631	-517087		-365.589	-1733080							1.68269	1.84963e-12	1.68269	2.99881e-12
16.161	437	16.161	476							1.93191	-0.02171	1.93196	-0.00465							95.4998	-200128	95.4998	-1667650		-365.54	-3817470							1.67067	3.32783e-12	1.67067	3.7689e-12
16.184	452	16.184	479							1.93196	-0.01182	1.93201	0.00163							95.5366	707863	95.5366	-3454210		-365.49	-5863330							1.65865	2.65549e-12	1.65865	3.02265e-12
16.207	467	16.207	460							1.93202	-0.00334	1.93206	-0.000520639							95.5733	3653830	95.5733	-3957730		-365.441	-7780860							1.64663	2.57681e-12	1.64663	3.24915e-12
16.23	426	16.23	469							1.93207	-0.0053	1.93212	0.00363							95.6101	6210970	95.6101	-2078310		-365.391	-9482810							1.63461	1.76857e-12	1.63461	3.39697e-12
16.253	456	16.253	469							1.93212	-0.00799	1.93217	0.000227275							95.6468	6281790	95.6468	879812		-365.342	-10889100							1.6226	2.73417e-12	1.6226	3.42081e-12
16.276	455	16.276	485							1.93218	-0.01631	1.93222	-0.0027							95.6836	3863950	95.6836	2180420		-365.292	-11931700							1.61058	1.43002e-12	1.61058	1.54684e-12
16.299	497	16.299	493							1.93223	-0.02395	1.93228	-0.00543							95.7203	818125	95.7203	393031		-365.243	-12558600							1.59856	2.82477e-12	1.59856	2.20488e-12
16.322	483	16.322	512							1.93228	-0.02305	1.93233	-0.01284							95.7571	-935156	95.7571	-3031280		-365.193	-12737100							1.58654	1.66844e-12	1.58654	3.11087e-12
16.345	422	16.345	503							1.93234	-0.01533	1.93238	0.00506							95.7939	-936619	95.7939	-5144610		-365.144	-12456200							1.57452	2.32885e-12	1.57452	3.77367e-12
16.368	464	16.368	458							1.93239	-0.00296	1.93244	0.01526							95.8306	-108607	95.8306	-4414430		-365.094	-11726900							1.5625	1.76857e-12	1.5625	2.79616e-12
16.391	460	16.391	494							1.93244	0.00214	1.93249	-0.01314							95.8674	481173	95.8674	-2041390		-365.045	-10581300							1.55048	2.42661e-12	1.55048	2.66502e-12
16.414	470	16.414	474							1.9325	0.000673183	1.93254	-0.00855							95.9041	527959	95.9041	-359421		-364.995	-9070380							1.53846	2.07613e-12	1.53846	2.70794e-12
16.437	436	16.437	489							1.93255	-0.00129	1.9326	0.01175							95.9409	268617	95.9409	-243573		-364.946	-7259680							1.52644	2.4886e-12	1.52644	3.23008e-12
16.46	452	16.46	474							1.9326	0.00267	1.93265	0.00544							95.9776	-234749	95.9776	-452390		-364.896	-5224720							1.51442	1.95692e-12	1.51442	2.77947e-12
16.483	427	16.483	469							1.93266	0.00382	1.9327	0.00119							96.0144	-1200040	96.0144	511991		-364.847	-3045430							1.5024	2.15242e-12	1.5024	3.5734e-12
16.506	459	16.506	467							1.93271	-0.00766	1.93276	-0.00323							96.0511	-2472620	96.0511	2366790		-364.797	-800825							1.49038	1.88301e-12	1.49038	2.82953e-12
16.529	479	16.529	457							1.93276	-0.01366	1.93281	-0.00659							96.0879	-3100270	96.0879	3285810		-364.748	1435890							1.47836	2.15481e-12	1.47836	2.9106e-12
16.552	453	16.552	469							1.93282	-0.0086	1.93286	-0.01593							96.1247	-1985670	96.1247	2087700		-364.698	3601030							1.46635	2.75324e-12	1.46635	2.91298e-12
16.575	461	16.575	490							1.93287	-0.00747	1.93292	-0.02041							96.1614	836849	96.1614	-293732		-364.649	5642810							1.45433	2.5029e-12	1.45433	2.15481e-12
16.598	489	16.598	488							1.93292	-0.01909	1.93297	-0.01191							96.1982	3697020	96.1982	-1857730		-364.599	7522010							1.44231	2.28356e-12	1.44231	2.76039e-12
16.621	465	16.621	484							1.93298	-0.01334	1.93302	-0.01737							96.2349	4363500	96.2349	-1855940		-364.55	9211020							1.43029	2.29071e-12	1.43029	3.30637e-12
16.644	447	16.644	470							1.93303	0.00277	1.93308	-0.01543							96.2717	1925560	96.2717	-1557990		-364.5	10691500							1.41827	1.86632e-12	1.41827	3.25392e-12
16.667	467	16.667	468							1.93308	-0.00128	1.93313	-0.0112							96.3084	-2196610	96.3084	-2472500		-364.45	11951100							1.40625	2.1262e-12	1.40625	3.11087e-12
16.69	463	16.69	495							1.93314	-5.66364e-05	1.93318	-0.01995							96.3452	-5076630	96.3452	-4155330		-364.401	12979400							1.39423	2.02368e-12	1.39423	2.81523e-12
16.713	447	16.713	486							1.93319	0.00559	1.93324	-0.01601							96.3819	-4312720	96.3819	-4399290		-364.351	13764500							1.38221	2.06421e-12	1.38221	2.58158e-12
16.736	464	16.736	453							1.93324	-0.00728	1.93329	-0.01088							96.4187	304453	96.4187	-1861220		-364.302	14290300							1.37019	2.36223e-12	1.37019	2.10236e-12
16.759	468	16.759	479							1.9333	-0.01853	1.93334	-0.01681							96.4555	6623680	96.4555	1849870		-364.252	14534400							1.35817	1.26551e-12	1.35817	2.98451e-12
16.782	471	16.782	485							1.93335	-0.01505	1.9334	-0.01719							96.4922	11426500	96.4922	3296630		-364.203	14469300							1.34615	1.95215e-12	1.34615	2.8796e-12
16.805	465	16.805	508							1.9334	-0.00491	1.93345	-0.00218							96.529	12279300	96.529	698350		-364.153	14063600							1.33413	2.398e-12	1.33413	3.62108e-12
16.828	471	16.828	508							1.93346	-0.00149	1.9335	0.00207							96.5657	8904310	96.5657	-3916180		-364.104	13286300							1.32211	2.5625e-12	1.32211	2.79854e-12
16.851	494	16.851	479							1.93351	-0.00811	1.93356	-0.00892							96.6025	3352190	96.6025	-6412760		-364.054	12111800							1.3101	1.58976e-12	1.3101	2.46237e-12
16.874	447	16.874	467							1.93356	-0.01169	1.93361	-0.00312							96.6392	-1205920	96.6392	-4557150		-364.005	10525900							1.29808	8.53044e-13	1.29808	2.94159e-12
16.897	456	16.897	510							1.93362	-0.01858	1.93366	0.0096							96.676	-2505570	96.676	-202453		-363.955	8531620							1.28606	3.242e-12	1.28606	2.8343e-12
16.92	427	16.92	447							1.93367	-0.02068	1.93371	0.01507							96.7127	-738121	96.7127	2636140		-363.906	6154280							1.27404	2.52436e-12	1.27404	3.24915e-12
16.943	489	16.943	497							1.93372	-0.01644	1.93377	0.00278							96.7495	1676500	96.7495	1808880		-363.856	3444700							1.26202	1.24167e-12	1.26202	3.44942e-12
16.966	463	16.966	516							1.93378	-0.01245	1.93382	-0.01436							96.7863	2176920	96.7863	-1009890		-363.807	480219							1.25	1.7185e-12	1.25	2.84145e-12
16.989	455	16.989	499							1.93383	-0.0063	1.93387	-0.00611							96.823	384743	96.823	-2339700		-363.757	-2637190							1.23798	2.82953e-12	1.23798	2.88914e-12
17.012	487	17.012	503							1.93388	-0.00976	1.93393	0.00595							96.8598	-1485810	96.8598	-609607		-363.708	-5785680							1.22596	1.72566e-12	1.22596	3.56863e-12
17.035	465	17.035	487							1.93394	-0.01593	1.93398	-0.00169							96.8965	-734986	96.8965	2339800		-363.658	-8830970							1.21394	2.78185e-12	1.21394	2.84384e-12
17.058	512	17.058	457							1.93399	-0.02263	1.93403	-0.01197							96.9333	3030480	96.9333	3363210		-363.609	-11636000							1.20192	2.93682e-12	1.20192	2.81523e-12
17.081	504	17.081	578							1.93404	-0.02368	1.93409	-0.00914							96.97	7143280	96.97	1318310		-363.559	-14071700							1.1899	2.14289e-12	1.1899	2.367e-12
17.104	487	17.104	502							1.9341	-0.01246	1.93414	0.000679643							97.0068	8084650	97.0068	-1878810		-363.51	-16028000							1.17788	1.04378e-12	1.17788	2.70079e-12
17.127	510	17.127	516							1.93415	-0.0047	1.93419	0.00981							97.0436	4696840	97.0436	-3316420		-363.46	-17423900							1.16586	1.82102e-12	1.16586	3.05126e-12
17.15	450	17.15	504							1.9342	-0.00623	1.93425	0.00394							97.0803	-634680	97.0803	-1899950		-363.411	-18215500							1.15385	2.94874e-12	1.15385	2.73178e-12
17.173	499	17.173	493							1.93426	-0.00413	1.9343	-0.01149							97.1171	-3963050	97.1171	936350		-363.361	-18400400							1.14183	1.56592e-12	1.14183	2.34078e-12
17.196	479	17.196	475							1.93431	-0.00111	1.93435	-0.02673							97.1538	-3072160	97.1538	3001340		-363.312	-18019100							1.12981	2.18342e-12	1.12981	3.10848e-12
17.219	465	17.219	521							1.93436	-0.01346	1.93441	-0.0421							97.1906	865315	97.1906	3453110		-363.262	-17151800							1.11779	2.88675e-12	1.11779	2.80092e-12
17.242	514	17.242	509							1.93442	-0.01107	1.93446	-0.03563							97.2273	4466290	97.2273	3110450		-363.213	-15911600							1.10577	3.45896e-12	1.10577	3.04649e-12
17.265	529	17.265	486							1.93447	-0.000273773	1.93451	-0.00928							97.2641	4759270	97.2641	3038730		-363.163	-14434300							1.09375	1.95931e-12	1.09375	2.29548e-12
17.288	472	17.288	533							1.93452	-0.0037	1.93457	-0.00423							97.3008	998755	97.3008	3250590		-363.114	-12866000							1.08173	2.28594e-12	1.08173	3.59486e-12
17.311	462	17.311	498							1.93458	-0.00409	1.93462	-0.02603							97.3376	-5272210	97.3376	2911220		-363.064	-11349200							1.06971	2.6841e-12	1.06971	2.71032e-12
17.334	497	17.334	509							1.93463	-0.01929	1.93468	-0.03045							97.3744	-11240400	97.3744	1577050		-363.015	-10010300							1.05769	2.18819e-12	1.05769	3.33021e-12
17.357	501	17.357	521							1.93468	-0.02751	1.93473	-0.01214							97.4111	-14013700	97.4111	-80457.6		-362.965	-8947700							1.04567	1.54446e-12	1.04567	3.29445e-12
17.38	449	17.38	498							1.93474	-0.00985	1.93478	-0.00981							97.4479	-11823800	97.4479	-865216		-362.916	-8223360							1.03365	2.08567e-12	1.03365	2.73655e-12
17.403	522	17.403	512							1.93479	-0.00587	1.93484	-0.01877							97.4846	-5225510	97.4846	-248373		-362.866	-7858560							1.02163	1.96169e-12	1.02163	2.53389e-12
17.426	488	17.426	486							1.93484	-0.01574	1.93489	-0.0162							97.5214	2534050	97.5214	1113210		-362.817	-7833630							1.00961	1.43717e-12	1.00961	3.41843e-12
17.449	477	17.449	561							1.9349	-0.01555	1.93494	-0.01034							97.5581	7092430	97.5581	1976590		-362.767	-8092160							0.9976	2.46237e-12	0.9976	2.86053e-12
17.472	493	17.472	501							1.93495	-0.01422	1.935	-0.01179							97.5949	6119500	97.5949	1540550		-362.718	-8549160							0.98558	1.75903e-12	0.98558	2.4433e-12
17.495	487	17.495	503							1.935	-0.01854	1.93505	-0.01835							97.6316	1551760	97.6316	-38003.1		-362.668	-9102130							0.97356	2.6984e-12	0.97356	2.98927e-12
17.518	498	17.518	495							1.93506	-0.01669	1.9351	-0.01295							97.6684	-1614090	97.6684	-1913340		-362.619	-9643670							0.96154	2.25494e-12	0.96154	2.94397e-12
17.541	538	17.541	553							1.93511	-0.01933	1.93516	0.00578							97.7052	438627	97.7052	-3187860		-362.569	-10074400							0.94952	1.69705e-12	0.94952	2.31693e-12
17.564	493	17.564	536							1.93516	-0.02041	1.93521	0.01437							97.7419	6765760	97.7419	-3414600		-362.52	-10314300							0.9375	3.20385e-12	0.9375	3.04888e-12
17.587	503	17.587	544							1.93522	-0.01761	1.93526	0.00488							97.7787	12347000	97.7787	-2779970		-362.47	-10311700							0.92548	1.71612e-12	0.92548	2.47191e-12
17.61	530	17.61	550							1.93527	-0.02023	1.93532	-0.01245							97.8154	12668300	97.8154	-1978210		-362.421	-10048200							0.91346	2.2764e-12	0.91346	2.64357e-12
17.633	557	17.633	500							1.93532	-0.01663	1.93537	-0.02079							97.8522	7824480	97.8522	-1784190		-362.371	-9539470							0.90144	2.61257e-12	0.90144	2.45045e-12
17.656	498	17.656	502							1.93538	-0.01995	1.93542	-0.00903							97.8889	2083900	97.8889	-2442670		-362.322	-8831750							0.88942	1.66367e-12	0.88942	3.10133e-12
17.679	515	17.679	481							1.93543	-0.02652	1.93548	0.00316							97.9257	-542984	97.9257	-3291330		-362.272	-7994340							0.8774	2.20011e-12	0.8774	1.89493e-12
17.702	546	17.702	514							1.93548	-0.00957	1.93553	-0.00281							97.9624	-68093.8	97.9624	-3098660		-362.223	-7109320							0.86538	1.78288e-12	0.86538	3.18955e-12
17.725	509	17.725	523							1.93554	0.01923	1.93558	-0.00941							97.9992	219295	97.9992	-1078140		-362.173	-6259630							0.85336	2.34316e-12	0.85336	2.92967e-12
17.748	491	17.748	531							1.93559	0.02935	1.93564	0.00281							98.036	-2079750	98.036	2206050		-362.124	-5517090							0.84135	2.22395e-12	0.84135	3.08464e-12
17.771	507	17.771	533							1.93564	0.01883	1.93569	0.01002							98.0727	-5636550	98.0727	4965540		-362.074	-4931980							0.82933	1.90924e-12	0.82933	3.37313e-12
17.794	530	17.794	493							1.9357	0.00751	1.93574	-0.00538							98.1095	-7019130	98.1095	5454310		-362.025	-4525530							0.81731	1.73519e-12	0.81731	2.61257e-12
17.817	518	17.817	520							1.93575	0.000697309	1.9358	-0.0203							98.1462	-4833120	98.1462	3389620		-361.975	-4286380							0.80529	2.39323e-12	0.80529	2.1262e-12
17.84	555	17.84	547							1.9358	0.00326	1.93585	-0.01488							98.183	-1596910	98.183	270502		-361.926	-4171520							0.79327	2.29309e-12	0.79327	2.67933e-12
17.863	508	17.863	562							1.93586	0.00329	1.9359	-0.01137							98.2197	-1144650	98.2197	-1754940		-361.876	-4111820							0.78125	2.49336e-12	0.78125	3.1204e-12
17.886	485	17.886	538							1.93591	-0.00896	1.93596	-0.02143							98.2565	-4417850	98.2565	-1549200		-361.827	-4021510							0.76923	3.71407e-12	0.76923	3.21339e-12
17.909	525	17.909	511							1.93596	-0.00889	1.93601	-0.01416							98.2932	-8343360	98.2932	201722		-361.777	-3810450							0.75721	9.05496e-13	0.75721	3.92149e-12
17.932	519	17.932	514							1.93602	-0.00839	1.93606	0.00133							98.33	-9051850	98.33	1637340		-361.728	-3397850							0.74519	2.25018e-12	0.74519	2.51482e-12
17.955	547	17.955	522							1.93607	-0.02574	1.93612	0.01004							98.3668	-5878910	98.3668	1221450		-361.678	-2725610							0.73317	1.53969e-12	0.73317	3.19908e-12
17.978	553	17.978	519							1.93612	-0.035	1.93617	0.00527							98.4035	-1819380	98.4035	-1134510		-361.629	-1769530							0.72115	1.99984e-12	0.72115	3.13233e-12
18.001	497	18.001	499							1.93618	-0.03244	1.93622	-0.01153							98.4403	-147478	98.4403	-4125220		-361.579	-546908							0.70913	2.89868e-12	0.70913	3.04173e-12
18.024	503	18.024	508							1.93623	-0.03231	1.93628	-0.00896							98.477	-1119550	98.477	-6107790		-361.53	880645							0.69711	3.05126e-12	0.69711	2.8796e-12
18.047	497	18.047	541							1.93628	-0.02284	1.93633	0.01215							98.5138	-2329000	98.5138	-6276870		-361.48	2409870							0.6851	2.64834e-12	0.6851	2.6841e-12
18.07	494	18.07	487							1.93634	-0.000273773	1.93638	0.02125							98.5505	-1956400	98.5505	-5092680		-361.431	3903900							0.67308	1.99507e-12	0.67308	3.05365e-12
18.093	545	18.093	502							1.93639	0.00104	1.93644	0.01388							98.5873	-916106	98.5873	-3720960		-361.381	5205060							0.66106	3.54241e-12	0.66106	3.58055e-12
18.116	505	18.116	541							1.93644	-0.0266	1.93649	0.0062							98.6241	-1413060	98.6241	-2994400		-361.332	6151200							0.64904	2.02368e-12	0.64904	2.56727e-12
18.139	484	18.139	509							1.9365	-0.03772	1.93654	-0.000888564							98.6608	-3787440	98.6608	-2763270		-361.282	6593740							0.63702	1.67082e-12	0.63702	2.47191e-12
18.162	490	18.162	486							1.93655	-0.02968	1.9366	-0.00644							98.6976	-5590220	98.6976	-2190830		-361.233	6415530							0.625	3.43512e-12	0.625	2.6531e-12
18.185	505	18.185	549							1.93661	-0.02788	1.93665	-0.01208							98.7343	-4200090	98.7343	-738334		-361.183	5546380							0.61298	1.69943e-12	0.61298	2.59112e-12
18.208	491	18.208	488							1.93666	-0.01816	1.9367	-0.01371							98.7711	-56623.3	98.7711	1089540		-361.134	3974520							0.60096	1.44432e-12	0.60096	3.55909e-12
18.231	527	18.231	540							1.93671	-0.00547	1.93676	-0.00272							98.8078	3310760	98.8078	2039020		-361.084	1752280							0.58894	3.13233e-12	0.58894	2.54343e-12
18.254	479	18.254	544							1.93677	-0.00752	1.93681	0.00363							98.8446	2751240	98.8446	1280280		-361.035	-1004640							0.57692	2.17865e-12	0.57692	2.1715e-12
18.277	504	18.277	559							1.93682	-0.00918	1.93687	-0.00193							98.8813	-1203030	98.8813	-652313		-360.985	-4124680							0.5649	3.26584e-12	0.5649	2.36223e-12
18.3	511	18.3	486							1.93687	-0.0067	1.93692	-0.00895							98.9181	-4775190	98.9181	-2182710		-360.936	-7394060							0.55288	1.17014e-12	0.55288	3.11564e-12
18.323	507	18.323	478							1.93693	-0.00617	1.93697	-0.01425							98.9549	-4689390	98.9549	-2104320		-360.886	-10575400							0.54086	2.34078e-12	0.54086	3.55433e-12
18.346	559	18.346	507							1.93698	-0.00624	1.93703	-0.00503							98.9916	-1307180	98.9916	-722140		-360.837	-13429400							0.52885	1.945e-12	0.52885	2.79854e-12
18.369	501	18.369	494							1.93703	-0.002	1.93708	0.01222							99.0284	1978180	99.0284	483977		-360.787	-15737500							0.51683	1.84725e-12	0.51683	1.6589e-12
18.392	502	18.392	483							1.93709	-0.00186	1.93713	0.01304							99.0651	2218400	99.0651	397850		-360.738	-17323200							0.50481	1.66367e-12	0.50481	2.7294e-12
18.415	520	18.415	523							1.93714	-0.00641	1.93719	-0.000918722							99.1019	-413195	99.1019	-593477		-360.688	-18069300							0.49279	1.95215e-12	0.49279	2.4886e-12
18.438	564	18.438	502							1.93719	0.000540489	1.93724	-0.01072							99.1386	-3219160	99.1386	-1120640		-360.639	-17930100							0.48077	1.84248e-12	0.48077	3.06557e-12
18.461	551	18.461	501							1.93725	0.00882	1.93729	-0.00435							99.1754	-3799780	99.1754	-493286		-360.589	-16936700							0.46875	2.68648e-12	0.46875	2.99881e-12
18.484	515	18.484	522							1.9373	-0.00185	1.93735	0.00844							99.2121	-2089060	99.2121	355655		-360.54	-15194200							0.45673	2.77231e-12	0.45673	2.66026e-12
18.507	552	18.507	477							1.93735	-0.02028	1.9374	0.0061							99.2489	75000.8	99.2489	-172127		-360.49	-12872400							0.44471	3.17762e-12	0.44471	2.19296e-12
18.53	578	18.53	534							1.93741	-0.0107	1.93745	-0.0023							99.2857	847820	99.2857	-2395560		-360.441	-10189400							0.43269	2.19296e-12	0.43269	3.77606e-12
18.553	475	18.553	519							1.93746	0.00666	1.93751	-0.0032							99.3224	-318426	99.3224	-4594570		-360.391	-7391050							0.42067	1.82579e-12	0.42067	2.84384e-12
18.576	497	18.576	494							1.93751	-0.00112	1.93756	-0.01785							99.3592	-2817970	99.3592	-4502410		-360.342	-4726980							0.40865	1.29173e-12	0.40865	1.53492e-12
18.599	507	18.599	513							1.93757	-0.01077	1.93761	-0.02143							99.3959	-5715140	99.3959	-1678500		-360.292	-2427220							0.39663	2.06659e-12	0.39663	2.76278e-12
18.622	552	18.622	528							1.93762	-0.01501	1.93767	-0.00185							99.4327	-8242080	99.4327	1754750		-360.243	-680227							0.38461	1.83056e-12	0.38461	2.81284e-12
18.645	534	18.645	509							1.93768	-0.02854	1.93772	-0.00226							99.4694	-9844810	99.4694	2989380		-360.193	384370							0.3726	2.59588e-12	0.3726	3.09418e-12
18.668	521	18.668	508							1.93773	-0.03236	1.93778	-0.00431							99.5062	-10200900	99.5062	1265960		-360.144	707181							0.36058	2.60542e-12	0.36058	3.10848e-12
18.691	501	18.691	513							1.93778	-0.0062	1.93783	0.000335844							99.5429	-9300570	99.5429	-1327510		-360.094	303275							0.34856	2.2311e-12	0.34856	2.28594e-12
18.714	510	18.714	498							1.93784	0.01377	1.93788	-0.01959							99.5797	-7324960	99.5797	-1905410		-360.045	-740999							0.33654	1.45386e-12	0.33654	3.06318e-12
18.737	488	18.737	512							1.93789	0.00794	1.93794	-0.03695							99.6165	-4394670	99.6165	321692		-359.995	-2278210							0.32452	2.65787e-12	0.32452	3.56863e-12
18.76	534	18.76	470							1.93794	0.00578	1.93799	-0.02243							99.6532	-713493	99.6532	3230570		-359.946	-4115870							0.3125	2.39561e-12	0.3125	2.42661e-12
18.783	497	18.783	470							1.938	0.0079	1.93804	-0.00236							99.69	2802990	99.69	3888900		-359.896	-6036550							0.30048	2.16196e-12	0.30048	3.211e-12
18.806	501	18.806	458							1.93805	-0.00386	1.9381	-0.00914							99.7267	4330080	99.7267	1475850		-359.846	-7820040							0.28846	2.64834e-12	0.28846	2.78662e-12
18.829	446	18.829	458							1.9381	-0.02375	1.93815	-0.00726							99.7635	2326960	99.7635	-1877320		-359.797	-9265120							0.27644	3.04649e-12	0.27644	2.44091e-12
18.852	420	18.852	468							1.93816	-0.02384	1.9382	0.01							99.8002	-2490280	99.8002	-3103820		-359.747	-10208900							0.26442	9.03112e-13	0.26442	1.91401e-12
18.875	495	18.875	477							1.93821	-0.00503	1.93826	0.000878685							99.837	-6574510	99.837	-1041410		-359.698	-10541600							0.2524	2.15004e-12	0.2524	2.58873e-12
18.898	467	18.898	478							1.93826	0.00439	1.93831	-0.00998							99.8737	-5840150	99.8737	2620010		-359.648	-10216000							0.24038	3.14425e-12	0.24038	2.68648e-12
18.921	485	18.921	445							1.93832	-7.47311e-05	1.93836	-0.0083							99.9105	627834	99.9105	5017930		-359.599	-9249910							0.22836	2.04752e-12	0.22836	3.02981e-12
18.944	481	18.944	528							1.93837	-0.01685	1.93842	-0.00295							99.9473	9012350	99.9473	4647840		-359.549	-7722080							0.21635	2.01653e-12	0.21635	3.19431e-12
18.967	512	18.967	489							1.93843	-0.02867	1.93847	0.00187							99.984	13428200	99.984	2388840		-359.5	-5762730							0.20433	2.37415e-12	0.20433	3.01073e-12
18.99	535	18.99	504							1.93848	-0.02305	1.93852	0.00528							100.021	10774700	100.021	347366		-359.45	-3538800							0.19231	2.09044e-12	0.19231	2.48621e-12
19.013	502	19.013	511							1.93853	-0.00963	1.93858	0.00807							100.058	3237360	100.058	-98410.9		-359.401	-1236470							0.18029	1.76857e-12	0.18029	2.27402e-12
19.036	531	19.036	479							1.93859	-0.00947	1.93863	4.1075e-06							100.094	-4009880	100.094	794935		-359.351	957537							0.16827	2.94397e-12	0.16827	2.61973e-12
19.059	515	19.059	496							1.93864	-0.02373	1.93869	-0.00518							100.131	-7558980	100.131	1843980		-359.302	2873800							0.15625	2.07852e-12	0.15625	3.20147e-12
19.082	516	19.082	479							1.93869	-0.01553	1.93874	0.00141							100.168	-8182820	100.168	2290450		-359.252	4375370							0.14423	2.47191e-12	0.14423	2.61496e-12
19.105	491	19.105	478							1.93875	-0.00333	1.93879	-0.00227							100.205	-8720240	100.205	2468350		-359.203	5368940							0.13221	1.64459e-12	0.13221	3.12756e-12
19.128	479	19.128	468							1.9388	-0.01272	1.93885	-0.02058							100.241	-10115200	100.241	3323010		-359.153	5810980							0.12019	1.31319e-12	0.12019	3.5138e-12
19.151	482	19.151	482							1.93885	-0.01786	1.9389	-0.0253							100.278	-10130500	100.278	5373050		-359.104	5708400							0.10817	1.25836e-12	0.10817	2.87245e-12
19.174	480	19.174	485							1.93891	-0.00998	1.93895	-0.00463							100.315	-6093930	100.315	8044870		-359.054	5114150							0.09615	2.3217e-12	0.09615	2.30501e-12
19.197	499	19.197	472							1.93896	-0.00683	1.93901	0.00175							100.352	1524210	100.352	9887040		-359.005	4118270							0.08413	1.45624e-12	0.08413	2.94636e-12
19.22	536	19.22	496							1.93901	-0.01397	1.93906	-0.02324							100.388	8784570	100.388	9504080		-358.955	2835670							0.07211	1.88778e-12	0.07211	2.6841e-12
19.243	519	19.243	495							1.93907	-0.01414	1.93911	-0.03628							100.425	11625500	100.425	6583390		-358.906	1392110							0.0601	1.40856e-12	0.0601	3.0608e-12
19.266	484	19.266	469							1.93912	-0.00304	1.93917	-0.03452							100.462	9324820	100.462	2295410		-358.856	-90021							0.04808	1.82579e-12	0.04808	2.67933e-12
19.289	509	19.289	473							1.93918	0.00266	1.93922	-0.0415							100.499	4609460	100.499	-1324270		-358.807	-1504730							0.03606	1.62314e-12	0.03606	2.51721e-12
19.312	502	19.312	469							1.93923	0.0026	1.93928	-0.04628							100.535	736049	100.535	-2715470		-358.757	-2772700							0.02404	1.90209e-12	0.02404	4.14799e-12
19.335	509	19.335	511							1.93928	0.000908414	1.93933	-0.03154							100.572	-1099140	100.572	-1905590		-358.708	-3848060							0.01202	1.87348e-12	0.01202	2.57681e-12
19.358	518	19.358	516							1.93934	0.00419	1.93938	-0.00752							100.609	-1630150	100.609	-435910		-358.658	-4720970							0	1.30365e-12	0	2.24064e-12
19.381	537	19.381	513							1.93939	0.0114	1.93944	0.00688							100.646	-1677880	100.646	-32686.9		-358.609	-5415990
19.404	535	19.404	442							1.93944	0.00137	1.93949	0.00763							100.682	-1232760	100.682	-1100290		-358.559	-5986560
19.427	514	19.427	460							1.9395	-0.00964	1.93954	-0.00141							100.719	-295246	100.719	-2405890		-358.51	-6506360
19.45	462	19.45	508							1.93955	-0.01571	1.9396	-0.00422							100.756	278447	100.756	-2305050		-358.46	-7058600
19.473	469	19.473	505							1.9396	-0.03355	1.93965	0.00176							100.793	-408015	100.793	-387217		-358.411	-7724450
19.496	458	19.496	508							1.93966	-0.03588	1.9397	-0.00318							100.829	-1724580	100.829	2039230		-358.361	-8571860
19.519	465	19.519	486							1.93971	-0.0012	1.93976	-0.01076							100.866	-1624130	100.866	3106210		-358.312	-9645900
19.542	470	19.542	481							1.93977	0.03223	1.93981	-0.00303							100.903	1004400	100.903	2067450		-358.262	-10961600
19.565	493	19.565	503							1.93982	0.02904	1.93987	0.00333							100.94	4306910	100.94	-108997		-358.213	-12500000
19.588	488	19.588	474							1.93987	0.00701	1.93992	-0.01055							100.976	4625720	100.976	-1727370		-358.163	-14207500
19.611	524	19.611	465							1.93993	-0.00477	1.93997	-0.02322							101.013	260192	101.013	-1865760		-358.114	-15999200
19.634	501	19.634	509							1.93998	-0.00954	1.94003	-0.01714							101.05	-6146400	101.05	-941816		-358.064	-17764600
19.657	474	19.657	501							1.94003	-0.01584	1.94008	-0.01077							101.087	-9620770	101.087	14907.4		-358.015	-19376500
19.68	464	19.68	513							1.94009	-0.02204	1.94013	0.00288							101.123	-7620380	101.123	422563		-357.965	-20701200
19.703	523	19.703	483							1.94014	-0.03258	1.94019	0.01455							101.16	-2632460	101.16	430775		-357.916	-21610000
19.726	497	19.726	450							1.94019	-0.03274	1.94024	0.00237							101.197	236669	101.197	365793		-357.866	-21989500
19.749	496	19.749	460							1.94025	-0.01902	1.94029	-0.01774							101.234	-1782700	101.234	221605		-357.817	-21752100
19.772	526	19.772	479							1.9403	-0.0194	1.94035	-0.02136							101.27	-6769940	101.27	-138124		-357.767	-20843500
19.795	485	19.795	480							1.94036	-0.0235	1.9404	-0.00954							101.307	-10558800	101.307	-431710		-357.718	-19248500
19.818	503	19.818	492							1.94041	-0.00774	1.94046	0.00309							101.344	-10965100	101.344	39165.4		-357.668	-16993600
19.841	514	19.841	479							1.94046	-0.00201	1.94051	0.00833							101.381	-9184400	101.381	1596010		-357.619	-14146700
19.864	501	19.864	469							1.94052	-0.0139	1.94056	-0.00677							101.417	-7368980	101.417	3438290		-357.569	-10813900
19.887	490	19.887	501							1.94057	-0.01213	1.94062	-0.01047							101.454	-5803450	101.454	3968360		-357.52	-7133310
19.91	513	19.91	528							1.94062	-0.01179	1.94067	0.000607264							101.491	-3144190	101.491	2148840		-357.47	-3267090
19.933	501	19.933	454							1.94068	-0.01952	1.94072	-0.00548							101.528	929806	101.528	-1346310		-357.421	608491
19.956	495	19.956	515							1.94073	-0.0158	1.94078	-0.00687							101.565	4404900	101.565	-4414470		-357.371	4314010
19.979	512	19.979	501							1.94079	-0.01722	1.94083	-0.00362							101.601	4955940	101.601	-5146280		-357.322	7678050
20.002	507	20.002	492							1.94084	-0.0189	1.94089	-0.00316							101.638	2893730	101.638	-3369880		-357.272	10548100
20.025	514	20.025	454							1.94089	-0.01828	1.94094	0.00578							101.675	1132030	101.675	-724405		-357.223	12800100
20.048	501	20.048	468							1.94095	-0.0205	1.94099	0.02187							101.712	1775140	101.712	774977		-357.173	14346700
20.071	465	20.071	510							1.941	-0.01253	1.94105	0.02122							101.748	3304130	101.748	363682		-357.124	15142800
20.094	465	20.094	457							1.94105	-0.00398	1.9411	-0.000966975							101.785	2087240	101.785	-1050440		-357.074	15188700
20.117	464	20.117	488							1.94111	0.000793814	1.94115	-0.017							101.822	-3052870	101.822	-1893220		-357.025	14530300
20.14	467	20.14	462							1.94116	-0.00704	1.94121	-0.02283							101.859	-8461520	101.859	-1336040		-356.975	13256200
20.163	480	20.163	470							1.94121	-0.01476	1.94126	-0.01469							101.895	-8714400	101.895	114245		-356.926	11492100
20.186	499	20.186	468							1.94127	-0.00557	1.94131	-0.00903							101.932	-2288420	101.932	1206650		-356.876	9392230
20.209	461	20.209	490							1.94132	0.000866193	1.94137	-0.00687							101.969	6282390	101.969	1047430		-356.827	7129310
20.232	460	20.232	498							1.94138	-0.01046	1.94142	0.01471							102.006	10400700	102.006	-260229		-356.777	4882400
20.255	474	20.255	453							1.94143	-0.02175	1.94148	0.01959							102.042	7588830	102.042	-1868300		-356.728	2824500
20.278	468	20.278	465							1.94148	-0.00707	1.94153	-0.00282							102.079	1516380	102.079	-2969770		-356.678	1110250
20.301	483	20.301	473							1.94154	0.00511	1.94158	-0.0193							102.116	-1988820	102.116	-3392990		-356.629	-135281
20.324	514	20.324	480							1.94159	-0.00903	1.94164	-0.02126							102.153	-489422	102.153	-3539710		-356.579	-825779
20.347	482	20.347	474							1.94164	-0.00534	1.94169	-0.01402							102.189	3621650	102.189	-3795540		-356.53	-920197
20.37	498	20.37	494							1.9417	0.01975	1.94174	-0.01051							102.226	6553110	102.226	-3983260		-356.48	-425954
20.393	488	20.393	502							1.94175	0.01943	1.9418	-0.00777							102.263	6996360	102.263	-3391900		-356.431	601482
20.416	477	20.416	484							1.94181	0.00632	1.94185	-0.00869							102.3	6312110	102.3	-1428300		-356.381	2062650
20.439	483	20.439	463							1.94186	-0.00369	1.94191	-0.01294							102.336	5742280	102.336	1629940		-356.332	3821600
20.462	492	20.462	505							1.94191	-0.00759	1.94196	-0.00803							102.373	4726970	102.373	4477840		-356.282	5716270
20.485	484	20.485	528							1.94197	-0.00173	1.94201	-0.00649							102.41	2405570	102.41	5500130		-356.233	7570970
20.508	464	20.508	482							1.94202	0.00452	1.94207	-0.01129							102.447	-121960	102.447	3910930		-356.183	9209970
20.531	446	20.531	462							1.94207	0.00825	1.94212	-0.0105							102.483	-355391	102.483	439633		-356.134	10471100
20.554	431	20.554	470							1.94213	-0.000243615	1.94217	-0.01055							102.52	2376480	102.52	-3027710		-356.084	11218500
20.577	484	20.577	456							1.94218	-0.00222	1.94223	-0.02085							102.557	5089920	102.557	-4642220		-356.035	11352700
20.6	471	20.6	483							1.94224	-0.00178	1.94228	-0.0208							102.594	3715110	102.594	-3766490		-355.985	10818200
20.623	443	20.623	493							1.94229	-0.01467	1.94234	-0.00434							102.63	-2168880	102.63	-1317590		-355.936	9607700
20.646	458	20.646	493							1.94234	-0.00877	1.94239	0.00074599							102.667	-7840960	102.667	880474		-355.886	7761700
20.669	451	20.669	488							1.9424	0.00752	1.94244	0.000601233							102.704	-7552680	102.704	1214170		-355.837	5364960
20.692	526	20.692	464							1.94245	0.000130342	1.9425	0.00721							102.741	-402519	102.741	-848781		-355.787	2539340
20.715	468	20.715	507							1.94251	-0.00874	1.94255	0.00109							102.777	8223310	102.777	-4547810		-355.738	-566125
20.738	491	20.738	525							1.94256	0.00114	1.94261	-0.01992							102.814	11397400	102.814	-8253380		-355.688	-3786940
20.761	474	20.761	493							1.94261	0.00249	1.94266	-0.02892							102.851	6854960	102.851	-10246800		-355.639	-6955570
20.784	484	20.784	499							1.94267	-0.000695982	1.94271	-0.02204							102.888	-1495260	102.888	-9516820		-355.589	-9913630
20.807	455	20.807	445							1.94272	0.00706	1.94277	-0.02013							102.924	-7813820	102.924	-6245230		-355.54	-12522600
20.83	465	20.83	502							1.94277	7.6058e-05	1.94282	-0.01448							102.961	-9533460	102.961	-1734400		-355.49	-14672700
20.853	493	20.853	482							1.94283	-0.02521	1.94287	-0.00748							102.998	-8407650	102.998	2237590		-355.441	-16287900
20.876	483	20.876	448							1.94288	-0.03198	1.94293	-0.01208							103.035	-7327190	103.035	4300570		-355.391	-17329600
20.899	457	20.899	455							1.94294	-0.0116	1.94298	-0.01084							103.072	-7185170	103.072	4090880		-355.342	-17795100
20.922	442	20.922	451							1.94299	-0.00404	1.94304	-0.00229							103.108	-7068190	103.108	2231010		-355.292	-17714500
20.945	441	20.945	442							1.94304	-0.0148	1.94309	0.00125							103.145	-6550980	103.145	-189461		-355.243	-17144700
20.968	443	20.968	516							1.9431	-0.01425	1.94314	-0.00103							103.182	-6566460	103.182	-2191410		-355.193	-16162000
20.991	487	20.991	512							1.94315	-0.00965	1.9432	-0.0013							103.219	-7729670	103.219	-3191350		-355.143	-14853700
21.014	430	21.014	441							1.9432	-0.01504	1.94325	0.00737							103.255	-8676650	103.255	-2997140		-355.094	-13309700
21.037	437	21.037	485							1.94326	-0.01825	1.9433	0.01123							103.292	-7102630	103.292	-1743350		-355.044	-11615100
21.06	449	21.06	443							1.94331	-0.01555	1.94336	-0.00544							103.329	-2599430	103.329	104151		-354.995	-9843840
21.083	469	21.083	467							1.94337	-0.01042	1.94341	-0.0246							103.366	2258220	103.366	1777720		-354.945	-8055000
21.106	482	21.106	504							1.94342	-0.00208	1.94347	-0.02574							103.402	4292110	103.402	2428030		-354.896	-6290230
21.129	469	21.129	484							1.94347	-0.00577	1.94352	-0.01536							103.439	3043650	103.439	1507370		-354.846	-4573870
21.152	466	21.152	449							1.94353	-0.01067	1.94357	-0.00628							103.476	1127200	103.476	-900597		-354.797	-2914680
21.175	461	21.175	474							1.94358	0.00213	1.94363	-0.00748							103.513	1071060	103.513	-4010150		-354.747	-1309010
21.198	448	21.198	491							1.94364	0.01459	1.94368	-0.01234							103.549	2307680	103.549	-6572100		-354.698	255106
21.221	436	21.221	450							1.94369	0.00891	1.94374	-0.01711							103.586	1899850	103.586	-7351100		-354.648	1793500
21.244	464	21.244	472							1.94374	0.00109	1.94379	-0.01464							103.623	-1804400	103.623	-5715630		-354.599	3321510
21.267	513	21.267	467							1.9438	0.00288	1.94384	0.000987253							103.66	-6898200	103.66	-2110160		-354.549	4850310
21.29	476	21.29	460							1.94385	-0.00555	1.9439	0.000100613							103.696	-9717650	103.696	1949910		-354.5	6384130
21.313	464	21.313	487							1.9439	-0.01443	1.94395	-0.01391							103.733	-8588670	103.733	4605450		-354.45	7918630
21.336	470	21.336	484							1.94396	-0.02358	1.944	-0.00982							103.77	-5157440	103.77	4829310		-354.401	9440390
21.359	464	21.359	479							1.94401	-0.02775	1.94406	-0.00411							103.807	-1978350	103.807	3203810		-354.351	10927600
21.382	470	21.382	477							1.94407	-0.01672	1.94411	-0.01571							103.843	404611	103.843	1507190		-354.302	12351700
21.405	480	21.405	488							1.94412	-0.01105	1.94417	-0.02789							103.88	3186810	103.88	1238800		-354.252	13679200
21.428	475	21.428	465							1.94417	0.00198	1.94422	-0.03114							103.917	6378480	103.917	2287960		-354.203	14875000
21.451	464	21.451	524							1.94423	0.00903	1.94427	-0.02635							103.954	7398180	103.954	3040680		-354.153	15904400
21.474	452	21.474	494							1.94428	-0.00659	1.94433	-0.01348							103.99	3665600	103.99	1982830		-354.104	16735900
21.497	476	21.497	454							1.94434	-0.00696	1.94438	-0.00136							104.027	-3528360	104.027	-647120		-354.054	17343900
21.52	489	21.52	461							1.94439	0.00205	1.94444	0.00164							104.064	-8882220	104.064	-2827270		-354.005	17710000
21.543	463	21.543	478							1.94444	-0.00718	1.94449	-0.000116524							104.101	-7792790	104.101	-2542090		-353.955	17824800
21.566	451	21.566	498							1.9445	-0.01771	1.94454	-0.000731744							104.137	-1177290	104.137	235738		-353.906	17688700
21.589	508	21.589	494							1.94455	-0.01736	1.9446	-0.00182							104.174	5118120	104.174	3321760		-353.856	17312300
21.612	494	21.612	460							1.94461	-0.00101	1.94465	-0.00372							104.211	6151640	104.211	4175110		-353.807	16716600
21.635	475	21.635	469							1.94466	0.01132	1.94471	-0.00937							104.248	2856580	104.248	2124330		-353.757	15932400
21.658	464	21.658	473							1.94471	0.00631	1.94476	-0.01527							104.284	775584	104.284	-1135240		-353.708	14999300
21.681	463	21.681	472							1.94477	0.00629	1.94481	-0.01559							104.321	3987060	104.321	-3200500		-353.658	13964600
21.704	472	21.704	480							1.94482	9.71082e-06	1.94487	-0.01363							104.358	10889600	104.358	-3133420		-353.609	12881200
21.727	444	21.727	487							1.94488	-0.00175	1.94492	-0.01792							104.395	16244000	104.395	-2089680		-353.559	11805300
21.75	431	21.75	494							1.94493	0.00317	1.94498	-0.02047							104.431	16778300	104.431	-1937660		-353.51	10793500
21.773	472	21.773	483							1.94498	0.00295	1.94503	-0.01153							104.468	13931400	104.468	-3342860		-353.46	9899320
21.796	472	21.796	470							1.94504	0.00927	1.94508	-0.00536							104.505	11087100	104.505	-5170780		-353.411	9169880
21.819	462	21.819	462							1.94509	0.01172	1.94514	-0.00319							104.542	9240830	104.542	-5637840		-353.361	8641940
21.842	462	21.842	499							1.94514	0.01204	1.94519	0.00253							104.578	6545440	104.578	-3962300		-353.312	8338500
21.865	498	21.865	531							1.9452	0.0087	1.94524	0.01548							104.615	1979050	104.615	-966743		-353.262	8265870
21.888	472	21.888	486							1.94525	0.00181	1.9453	0.01478							104.652	-2023000	104.652	1735400		-353.213	8411630
21.911	470	21.911	452							1.94531	0.00829	1.94535	-0.00585							104.689	-1926410	104.689	3013590		-353.163	8743850
21.934	535	21.934	480							1.94536	0.01327	1.94541	-0.00124							104.726	2083650	104.726	2793120		-353.114	9211860
21.957	502	21.957	477							1.94541	0.00303	1.94546	0.01064							104.762	5092130	104.762	1655180		-353.064	9748670
21.98	491	21.98	482							1.94547	-0.00109	1.94551	0.00789							104.799	2463090	104.799	117100		-353.015	10275100
22.003	491	22.003	493							1.94552	0.00157	1.94557	0.0176							104.836	-4374420	104.836	-1653990		-352.965	10705300
22.026	490	22.026	516							1.94558	-0.00183	1.94562	0.01015							104.873	-8430730	104.873	-3555460		-352.916	10953800
22.049	444	22.049	499							1.94563	-0.00578	1.94568	-0.01664							104.909	-4341230	104.909	-5142260		-352.866	10942600
22.072	466	22.072	489							1.94568	0.00271	1.94573	-0.01972							104.946	5301520	104.946	-5601060		-352.817	10609000
22.095	469	22.095	482							1.94574	0.01379	1.94578	-0.01396							104.983	11817200	104.983	-4217970		-352.767	9911970
22.118	504	22.118	472							1.94579	0.00272	1.94584	-0.0164							105.02	9116430	105.02	-1026010		-352.718	8837630
22.141	488	22.141	474							1.94585	-0.00775	1.94589	-0.00921							105.056	52307.4	105.056	2867730		-352.668	7402550
22.164	509	22.164	487							1.9459	0.0046	1.94595	-0.00425							105.093	-6512660	105.093	5647640		-352.619	5654510
22.187	526	22.187	504							1.94595	0.01374	1.946	-0.01062							105.13	-4860360	105.13	5804400		-352.569	3670470
22.21	478	22.21	443							1.94601	0.01011	1.94605	-0.01409							105.167	2071980	105.167	3215800		-352.52	1551910
22.233	505	22.233	509							1.94606	0.00162	1.94611	-0.01617							105.203	6594180	105.203	-555250		-352.47	-582330
22.256	467	22.256	508							1.94612	-0.00466	1.94616	-0.0159							105.24	4904230	105.24	-3182270		-352.421	-2605090
22.279	439	22.279	504							1.94617	-0.00729	1.94622	-0.01682							105.277	716933	105.277	-3184540		-352.371	-4391020
22.302	463	22.302	452							1.94622	-0.00498	1.94627	-0.0099							105.314	76880.5	105.314	-968528		-352.322	-5826920
22.325	472	22.325	480							1.94628	0.000727467	1.94632	-0.000960943							105.35	3685780	105.35	1615230		-352.272	-6821290
22.348	433	22.348	485							1.94633	-0.0069	1.94638	-0.00344							105.387	5838730	105.387	2838610		-352.223	-7312180
22.371	446	22.371	471							1.94639	-0.01843	1.94643	-0.00918							105.424	1342230	105.424	2379040		-352.173	-7272540
22.394	483	22.394	514							1.94644	-0.00886	1.94649	-0.0219							105.461	-7571070	105.461	1201310		-352.124	-6712590
22.417	455	22.417	487							1.94649	0.00917	1.94654	-0.02232							105.497	-12584600	105.497	329055		-352.074	-5678840
22.44	507	22.44	492							1.94655	0.01174	1.94659	-0.00301							105.534	-7929310	105.534	-120613		-352.025	-4249970
22.463	489	22.463	450							1.9466	0.00442	1.94665	-0.00292							105.571	3005430	105.571	-672240		-351.975	-2529890
22.486	475	22.486	468							1.94666	-0.00222	1.9467	-0.01743							105.608	10454900	105.608	-1474490		-351.926	-638690
22.509	448	22.509	485							1.94671	-0.00695	1.94676	-0.00668							105.644	7724080	105.644	-1856980		-351.876	1297660
22.532	452	22.532	458							1.94676	-0.00447	1.94681	0.0019							105.681	-2547830	105.681	-1061640		-351.827	3157760
22.555	484	22.555	476							1.94682	0.00444	1.94686	-0.000442228							105.718	-11581900	105.718	713291		-351.777	4834430
22.578	506	22.578	492							1.94687	-0.00222	1.94692	0.00342							105.755	-13312000	105.755	2273350		-351.728	6242660
22.601	533	22.601	497							1.94693	-0.01575	1.94697	-0.01141							105.791	-9538420	105.791	2556080		-351.678	7325040
22.624	462	22.624	479							1.94698	-0.0175	1.94703	-0.02311							105.828	-6631260	105.828	1659370		-351.629	8054340
22.647	482	22.647	515							1.94703	-0.01637	1.94708	-0.00843							105.865	-8189480	105.865	541924		-351.579	8433010
22.67	506	22.67	487							1.94709	-0.00813	1.94714	0.0059							105.902	-11724700	105.902	-262098		-351.53	8489920
22.693	469	22.693	508							1.94714	0.00453	1.94719	0.00584							105.938	-12250700	105.938	-1307210		-351.48	8274710
22.716	491	22.716	473							1.9472	0.01704	1.94724	-0.00106							105.975	-8054570	105.975	-3329860		-351.431	7850560
22.739	497	22.739	481							1.94725	0.02268	1.9473	1.01391e-05							106.012	-2267620	106.012	-5779580		-351.381	7286270
22.762	463	22.762	489							1.9473	0.00595	1.94735	0.000112676							106.049	805611	106.049	-6738480		-351.332	6648510
22.785	475	22.785	466							1.94736	-0.01585	1.94741	-0.01555							106.085	-57911.9	106.085	-4772230		-351.282	5995100
22.808	499	22.808	493							1.94741	-0.02109	1.94746	-0.02652							106.122	-2665290	106.122	-897401		-351.233	5370100
22.831	505	22.831	488							1.94747	-0.01772	1.94751	-0.01884							106.159	-4499390	106.159	1708820		-351.183	4800980
22.854	532	22.854	486							1.94752	-0.02169	1.94757	-0.01447							106.196	-5144330	106.196	447959		-351.134	4298240
22.877	491	22.877	482							1.94758	-0.02659	1.94762	-0.01947							106.233	-5575710	106.233	-4064350		-351.084	3857170
22.9	477	22.9	453							1.94763	-0.01845	1.94768	-0.01975							106.269	-6031350	106.269	-8248220		-351.035	3461490
22.923	486	22.923	470							1.94768	-0.00688	1.94773	-0.0222							106.306	-5616490	106.306	-8684000		-350.985	3088240
22.946	483	22.946	485							1.94774	-0.0083	1.94778	-0.02167							106.343	-4069330	106.343	-5126790		-350.936	2713100
22.969	477	22.969	474							1.94779	-0.00911	1.94784	-0.01188							106.38	-3023400	106.38	-475385		-350.886	2315520
22.992	458	22.992	493							1.94785	0.00778	1.94789	-0.00282							106.416	-4648150	106.416	2138320		-350.837	1882890
23.015	511	23.015	484							1.9479	0.01012	1.94795	0.000733927							106.453	-8986850	106.453	2093540		-350.787	1413200
23.038	467	23.038	495							1.94795	-0.00302	1.948	-0.00611							106.49	-13254300	106.49	1194200		-350.738	915968
23.061	459	23.061	483							1.94801	0.00782	1.94805	-0.02415							106.527	-14288700	106.527	1217220		-350.688	411176
23.084	489	23.084	488							1.94806	0.01505	1.94811	-0.0242							106.563	-11685800	106.563	1973130		-350.639	-73321
23.107	481	23.107	496							1.94812	-0.000521067	1.94816	-0.00912							106.6	-8239730	106.6	1896930		-350.589	-505765
23.13	470	23.13	530							1.94817	-0.00445	1.94822	-0.01067							106.637	-7230350	106.637	198948		-350.539	-855050
23.153	519	23.153	479							1.94822	-0.00336	1.94827	-0.01637							106.674	-9427850	106.674	-2067160		-350.49	-1095350
23.176	529	23.176	525							1.94828	-0.02147	1.94832	-0.01624							106.71	-12717700	106.71	-3216370		-350.44	-1210000
23.199	498	23.199	504							1.94833	-0.04213	1.94838	-0.01477							106.747	-14242100	106.747	-2875830		-350.391	-1194260
23.222	493	23.222	510							1.94839	-0.03951	1.94843	-0.01872							106.784	-12545300	106.784	-2307320		-350.341	-1056310
23.245	468	23.245	479							1.94844	-0.01919	1.94849	-0.01304							106.821	-7910340	106.821	-2770300		-350.292	-816507
23.268	465	23.268	503							1.94849	-0.00407	1.94854	-0.0025							106.857	-1494590	106.857	-3964160		-350.242	-504918
23.291	486	23.291	517							1.94855	0.00371	1.9486	-0.00931							106.894	5155890	106.894	-4472330		-350.193	-157357
23.314	479	23.314	504							1.9486	-0.00363	1.94865	-0.01082							106.931	9992880	106.931	-3661330		-350.143	189456
23.337	480	23.337	489							1.94866	-0.01682	1.9487	-0.00331							106.968	10956500	106.968	-2643160		-350.094	503023
23.36	491	23.36	484							1.94871	-0.01255	1.94876	-0.00719							107.004	7544440	107.004	-2974840		-350.044	759792
23.383	454	23.383	473							1.94877	-0.01179	1.94881	-0.01514							107.041	1953830	107.041	-4558150		-349.995	948814
23.406	485	23.406	476							1.94882	-0.01872	1.94887	-0.01521							107.078	-2059890	107.078	-5372330		-349.945	1073810
23.429	514	23.429	468							1.94887	-0.0207	1.94892	-0.01653							107.115	-2183900	107.115	-3664870		-349.896	1153340
23.452	492	23.452	513							1.94893	-0.01879	1.94897	-0.01693							107.151	421267	107.151	-240451		-349.846	1218950
23.475	462	23.475	524							1.94898	-0.01574	1.94903	-0.00799							107.188	2316320	107.188	1939300		-349.797	1311540
23.498	476	23.498	504							1.94904	-0.00965	1.94908	0.00517							107.225	1156310	107.225	764584		-349.747	1476240
23.521	467	23.521	503							1.94909	-0.00639	1.94914	0.01008							107.262	-2195200	107.262	-2546160		-349.698	1756590
23.544	493	23.544	547							1.94914	-0.01617	1.94919	0.00309							107.298	-4903120	107.298	-4354610		-349.648	2188450
23.567	479	23.567	511							1.9492	-0.02124	1.94925	-0.0082							107.335	-5195410	107.335	-2206090		-349.599	2794750
23.59	499	23.59	507							1.94925	-0.01368	1.9493	-0.01556							107.372	-3833140	107.372	2555310		-349.549	3581390
23.613	479	23.613	503							1.94931	-0.01143	1.94935	-0.02307							107.409	-2680360	107.409	5943370		-349.5	4535070
23.636	476	23.636	513							1.94936	-0.01407	1.94941	-0.02756							107.445	-2412760	107.445	5122970		-349.45	5623340
23.659	518	23.659	542							1.94942	-0.01082	1.94946	-0.01119							107.482	-2143070	107.482	975766		-349.401	6796750
23.682	490	23.682	541							1.94947	-1.44154e-05	1.94952	0.00178							107.519	-1127580	107.519	-3044890		-349.351	7993150
23.705	510	23.705	534							1.94952	0.00441	1.94957	0.00315							107.556	-88898.6	107.556	-4330720		-349.302	9143500
23.728	501	23.728	556							1.94958	-0.0127	1.94962	0.00756							107.592	-302571	107.592	-3180140		-349.252	10178700
23.751	505	23.751	510							1.94963	-0.0216	1.94968	-0.00128							107.629	-1620790	107.629	-1661260		-349.203	11036300
23.774	463	23.774	512							1.94969	-0.01258	1.94973	-0.01849							107.666	-2161460	107.666	-1005850		-349.153	11667300
23.797	515	23.797	530							1.94974	-0.0086	1.94979	-0.01562							107.703	-389625	107.703	-605082		-349.104	12040800
23.82	502	23.82	529							1.94979	-0.00261	1.94984	-0.00498							107.739	2829820	107.739	525274		-349.054	12147600
23.843	472	23.843	526							1.94985	-0.00232	1.9499	-0.01637							107.776	4900560	107.776	1944380		-349.005	12000600
23.866	473	23.866	528							1.9499	-0.0152	1.94995	-0.01907							107.813	4374120	107.813	2061710		-348.955	11634100
23.889	476	23.889	533							1.94996	-0.01169	1.95	-0.00175							107.85	2655690	107.85	222961		-348.906	11100000
23.912	499	23.912	509							1.95001	-0.00121	1.95006	0.00484							107.887	2293060	107.887	-2027660		-348.856	10462300
23.935	505	23.935	532							1.95007	-0.01125	1.95011	0.01158							107.923	3684830	107.923	-2315610		-348.807	9791240
23.958	517	23.958	502							1.95012	-0.02427	1.95017	0.00983							107.96	4214220	107.96	-107850		-348.757	9155690
23.981	496	23.981	538							1.95017	-0.02714	1.95022	-0.0084							107.997	1206750	107.997	2396550		-348.708	8616900
24.004	510	24.004	525							1.95023	-0.02068	1.95028	-0.00539							108.034	-4482340	108.034	2431150		-348.658	8222600
24.027	517	24.027	549							1.95028	-0.01207	1.95033	0.01332							108.07	-8575870	108.07	-305941		-348.609	8002730
24.05	494	24.05	539							1.95034	0.00363	1.95038	0.01824							108.107	-7517650	108.107	-3113990		-348.559	7967110
24.073	490	24.073	511							1.95039	0.01106	1.95044	0.00578							108.144	-2269350	108.144	-3015740		-348.51	8105050
24.096	512	24.096	533							1.95045	-0.01252	1.95049	-0.01804							108.181	2538120	108.181	70267.2		-348.46	8387060
24.119	538	24.119	525							1.9505	-0.01895	1.95055	-0.03585							108.217	3337590	108.217	3126070		-348.411	8768150
24.142	523	24.142	522							1.95055	-0.000780424	1.9506	-0.02559							108.254	1091540	108.254	3076190		-348.361	9192510
24.165	519	24.165	534							1.95061	0.0021	1.95065	-0.00953							108.291	-294706	108.291	-129368		-348.312	9598890
24.188	549	24.188	542							1.95066	-0.00117	1.95071	-0.01428							108.328	1288710	108.328	-3616760		-348.262	9926200
24.211	543	24.211	572							1.95072	0.00143	1.95076	-0.01589							108.364	3714510	108.364	-4650490		-348.213	10118600
24.234	519	24.234	551							1.95077	0.00322	1.95082	0.00123							108.401	3236240	108.401	-3296720		-348.163	10130200
24.257	495	24.257	560							1.95083	-0.00402	1.95087	0.00598							108.438	-927143	108.438	-1902650		-348.114	9927820
24.28	491	24.28	563							1.95088	-0.01065	1.95093	-0.01501							108.475	-5406270	108.475	-2174170		-348.064	9493390
24.303	531	24.303	542							1.95093	0.00777	1.95098	-0.02079							108.511	-6308360	108.511	-3220270		-348.015	8824390
24.326	559	24.326	558							1.95099	0.02882	1.95103	-0.01083							108.548	-3461800	108.548	-2729430		-347.965	7933380
24.349	578	24.349	509							1.95104	0.01775	1.95109	-0.00855							108.585	-351596	108.585	127661		-347.916	6846570
24.372	539	24.372	524							1.9511	0.000757625	1.95114	-0.01138							108.622	152027	108.622	3413750		-347.866	5601640
24.395	488	24.395	564							1.95115	-0.00515	1.9512	-0.00974							108.658	-779950	108.658	4286790		-347.817	4245350
24.418	538	24.418	536							1.95121	-0.01102	1.95125	-0.00334							108.695	536813	108.695	2021590		-347.767	2830940
24.441	554	24.441	509							1.95126	-0.01039	1.95131	-0.01218							108.732	5528400	108.732	-1107650		-347.718	1415660
24.464	556	24.464	518							1.95131	-0.00909	1.95136	-0.02229							108.769	10999800	108.769	-2071810		-347.668	58541
24.487	542	24.487	546							1.95137	-0.012	1.95141	-0.00801							108.805	12208800	108.805	-74647.8		-347.619	-1181750
24.51	513	24.51	552							1.95142	-0.01883	1.95147	0.01031							108.842	8103690	108.842	2856110		-347.569	-2248810
24.533	507	24.533	571							1.95148	-0.02469	1.95152	0.01016							108.879	2735370	108.879	4192060		-347.52	-3090480
24.556	570	24.556	617							1.95153	-0.02585	1.95158	0.00013077							108.916	995072	108.916	3560460		-347.47	-3660810
24.579	566	24.579	532							1.95159	-0.01909	1.95163	-0.00937							108.952	3263730	108.952	2906100		-347.421	-3922280
24.602	543	24.602	585							1.95164	-0.01109	1.95169	-0.0126							108.989	4968010	108.989	4104270		-347.371	-3848210
24.625	536	24.625	570							1.95169	-0.01292	1.95174	-0.01419							109.026	1694140	109.026	6698550		-347.322	-3425160
24.648	571	24.648	597							1.95175	-0.01213	1.95179	-0.01582							109.063	-5686860	109.063	8222450		-347.272	-2655390
24.671	544	24.671	575							1.9518	-0.01321	1.95185	-0.00384							109.099	-11546400	109.099	6751810		-347.223	-1558840
24.694	562	24.694	584							1.95186	-0.0063	1.9519	0.00513							109.136	-11200600	109.136	2992540		-347.173	-174505
24.717	560	24.717	557							1.95191	0.00567	1.95196	0.00253							109.173	-5684560	109.173	-241295		-347.124	1439280
24.74	572	24.74	577							1.95197	0.00614	1.95201	-0.000912691							109.21	-538737	109.21	-583768		-347.074	3205820
24.763	572	24.763	614							1.95202	0.00875	1.95207	-0.01308							109.246	-31614.9	109.246	1846680		-347.025	5032690
24.786	563	24.786	591							1.95207	0.01157	1.95212	-0.02161							109.283	-3018380	109.283	4788160		-346.975	6815900
24.809	555	24.809	579							1.95213	0.00738	1.95217	-0.00886							109.32	-4645820	109.32	5974960		-346.926	8445620
24.832	582	24.832	616							1.95218	-0.000605509	1.95223	0.000528854							109.357	-1766710	109.357	4905200		-346.876	9813140
24.855	572	24.855	595							1.95224	-0.00784	1.95228	-0.00983							109.394	3799320	109.394	2756960		-346.827	10818600
24.878	586	24.878	610							1.95229	-0.01132	1.95234	-0.01036							109.43	7350030	109.43	939745		-346.777	11378600
24.901	591	24.901	600							1.95235	-0.01779	1.95239	0.00347							109.467	6132880	109.467	-94996.6		-346.728	11433800
24.924	553	24.924	600							1.9524	-0.02629	1.95245	0.0076							109.504	1764830	109.504	-789677		-346.678	10954800
24.947	552	24.947	632							1.95245	-0.02751	1.9525	0.00441							109.541	-1871420	109.541	-1594040		-346.629	9945620
24.97	580	24.97	629							1.95251	-0.01713	1.95256	0.000299654							109.577	-2490000	109.577	-2358170		-346.579	8445860
24.993	563	24.993	570							1.95256	-0.000201394	1.95261	-0.01192							109.614	-890975	109.614	-2552320		-346.53	6528890
25.016	545	25.016	584							1.95262	0.0051	1.95266	-0.01707							109.651	908415	109.651	-1924820		-346.48	4297770
25.039	571	25.039	659							1.95267	0.00304	1.95272	-0.00519							109.688	2173460	109.688	-886446		-346.431	1878330
25.062	606	25.062	638							1.95273	-0.00134	1.95277	-0.00453							109.724	3669650	109.724	-312656		-346.381	-589837
25.085	604	25.085	672							1.95278	-0.01838	1.95283	-0.00303							109.761	5767660	109.761	-974982		-346.332	-2963870
25.108	581	25.108	617							1.95283	-0.02182	1.95288	0.01239							109.798	7110980	109.798	-2988270		-346.282	-5108630
25.131	600	25.131	624							1.95289	-0.00506	1.95294	-0.00144							109.835	5662500	109.835	-5579060		-346.233	-6907220
25.154	618	25.154	673							1.95294	0.000154468	1.95299	-0.0179							109.871	998771	109.871	-7374040		-346.183	-8270140
25.177	576	25.177	661							1.953	-0.00218	1.95304	-0.00144							109.908	-4790460	109.908	-7213300		-346.134	-9142110
25.2	638	25.2	642							1.95305	-0.00907	1.9531	0.01747							109.945	-8688750	109.945	-5072190		-346.084	-9506000
25.223	634	25.223	668							1.95311	-0.01536	1.95315	0.02571							109.982	-9222430	109.982	-2311990		-346.035	-9383550
25.246	590	25.246	646							1.95316	-0.00694	1.95321	0.01723							110.018	-7383950	110.018	-765349		-345.985	-8832590
25.269	628	25.269	633							1.95322	0.00154	1.95326	-0.00115							110.055	-5329150	110.055	-1183200		-345.935	-7941380
25.292	659	25.292	635							1.95327	0.0063	1.95332	-0.01076							110.092	-4383760	110.092	-2436800		-345.886	-6820260
25.315	645	25.315	659							1.95332	0.00534	1.95337	-0.01305							110.129	-4262770	110.129	-2470400		-345.836	-5591670
25.338	642	25.338	676							1.95338	-0.00152	1.95343	-0.00816							110.165	-3880630	110.165	-371317		-345.787	-4379410
25.361	614	25.361	672							1.95343	-0.00816	1.95348	0.01175							110.202	-2598240	110.202	2416950		-345.737	-3298070
25.384	614	25.384	639							1.95349	-0.01409	1.95353	0.01777							110.239	-702935	110.239	3183090		-345.688	-2443730
25.407	637	25.407	635							1.95354	-0.00863	1.95359	-0.00509							110.276	1016740	110.276	581052		-345.638	-1886670
25.43	645	25.43	697							1.9536	-0.00298	1.95364	-0.02693							110.312	1938070	110.312	-3706750		-345.589	-1666760
25.453	661	25.453	734							1.95365	-0.00807	1.9537	-0.03234							110.349	1965750	110.349	-6130380		-345.539	-1791720
25.476	651	25.476	695							1.95371	-0.01356	1.95375	-0.01703							110.386	1535450	110.386	-4417600		-345.49	-2238510
25.499	704	25.499	712							1.95376	-0.01854	1.95381	0.00066758							110.423	1376970	110.423	239258		-345.44	-2957370
25.522	711	25.522	703							1.95381	-0.02087	1.95386	0.00861							110.459	2062280	110.459	4153970		-345.391	-3878070
25.545	724	25.545	672							1.95387	-0.0184	1.95392	0.00694							110.496	3484990	110.496	4452300		-345.341	-4917690
25.568	705	25.568	702							1.95392	-0.00582	1.95397	-0.00457							110.533	4720820	110.533	1577980		-345.292	-5989080
25.591	730	25.591	741							1.95398	0.00189	1.95402	-0.0055							110.57	4621580	110.57	-1361510		-345.242	-7009060
25.614	694	25.614	688							1.95403	-0.00828	1.95408	0.00965							110.606	2793140	110.606	-1651370		-345.193	-7905750
25.637	681	25.637	775							1.95409	-0.00354	1.95413	0.01923							110.643	22348.2	110.643	629569		-345.143	-8624180
25.66	718	25.66	723							1.95414	0.01345	1.95419	0.01075							110.68	-2391590	110.68	3097660		-345.094	-9129900
25.683	718	25.683	728							1.9542	0.01069	1.95424	-0.00111							110.717	-3797060	110.717	3672560		-345.044	-9410310
25.706	734	25.706	703							1.95425	-0.00332	1.9543	-0.00688							110.753	-4605090	110.753	2500170		-344.995	-9473700
25.729	760	25.729	738							1.9543	-0.01273	1.95435	-0.00754							110.79	-5478200	110.79	1348320		-344.945	-9346340
25.752	741	25.752	762							1.95436	-0.02331	1.95441	-0.01027							110.827	-6228260	110.827	1410720		-344.896	-9067990
25.775	778	25.775	711							1.95441	-0.02513	1.95446	-0.01527							110.864	-5793780	110.864	2036220		-344.846	-8686470
25.798	785	25.798	726							1.95447	-0.00693	1.95451	-0.01084							110.9	-3486740	110.9	1698640		-344.797	-8251840
25.821	744	25.821	764							1.95452	-0.00374	1.95457	-0.01159							110.937	-160023	110.937	-9221.87		-344.747	-7810860
25.844	726	25.844	805							1.95458	-0.01254	1.95462	-0.01811							110.974	2146070	110.974	-1647420		-344.698	-7402300
25.867	762	25.867	787							1.95463	-0.000882961	1.95468	-0.0122							111.011	1931110	111.011	-1294320		-344.648	-7053460
25.89	791	25.89	801							1.95469	0.0041	1.95473	-0.00749							111.048	-362439	111.048	1465380		-344.599	-6778270
25.913	749	25.913	821							1.95474	-0.00508	1.95479	-0.00668							111.084	-2719090	111.084	5032590		-344.549	-6576930
25.936	787	25.936	801							1.95479	-0.01062	1.95484	0.00226							111.121	-3321740	111.121	7249960		-344.5	-6437130
25.959	756	25.959	751							1.95485	-0.02603	1.9549	0.00938							111.158	-1956670	111.158	7282420		-344.45	-6336610
25.982	792	25.982	807							1.9549	-0.03159	1.95495	-0.00105							111.195	194021	111.195	6089860		-344.401	-6246620
26.005	854	26.005	812							1.95496	-0.02126	1.955	-0.01486							111.231	1863040	111.231	5243290		-344.351	-6135990
26.028	850	26.028	834							1.95501	-0.02537	1.95506	-0.01784							111.268	2617770	111.268	5465460		-344.302	-5975190
26.051	802	26.051	844							1.95507	-0.02809	1.95511	-0.02017							111.305	2660070	111.305	6288780		-344.252	-5740160
26.074	849	26.074	847							1.95512	-0.02211	1.95517	-0.0236							111.342	2187540	111.342	6855110		-344.203	-5415330
26.097	864	26.097	888							1.95518	-0.01537	1.95522	-0.02615							111.378	1309470	111.378	6781770		-344.153	-4995670
26.12	871	26.12	838							1.95523	-0.01158	1.95528	-0.02424							111.415	477191	111.415	6273260		-344.104	-4487490
26.143	932	26.143	844							1.95528	-0.01009	1.95533	-0.01802							111.452	492466	111.452	5694130		-344.054	-3908100
26.166	910	26.166	862							1.95534	-0.00415	1.95539	-0.00309							111.489	1673270	111.489	5302780		-344.005	-3284170
26.189	854	26.189	861							1.95539	-0.00831	1.95544	0.01361							111.525	3076060	111.525	5339550		-343.955	-2649130
26.212	913	26.212	887							1.95545	-0.01092	1.95549	0.01683							111.562	3003520	111.562	6023050		-343.906	-2039820
26.235	905	26.235	850							1.9555	-0.00111	1.95555	0.0143							111.599	680410	111.599	7168470		-343.856	-1492660
26.258	948	26.258	892							1.95556	0.000588741	1.9556	0.01669							111.636	-2583630	111.636	7876730		-343.807	-1039830
26.281	882	26.281	913							1.95561	-0.00518	1.95566	0.01245							111.672	-4222870	111.672	6970520		-343.757	-705644
26.304	902	26.304	914							1.95567	-0.00769	1.95571	-0.01257							111.709	-2686440	111.709	4077420		-343.708	-503672
26.327	924	26.327	918							1.95572	-0.01253	1.95577	-0.0214							111.746	1081590	111.746	318473		-343.658	-434746
26.35	961	26.35	960							1.95578	-0.01286	1.95582	0.0023							111.783	4525010	111.783	-2313460		-343.609	-486169
26.373	941	26.373	943							1.95583	-0.00838	1.95588	0.01704							111.819	5847690	111.819	-2526320		-343.559	-632204
26.396	1003	26.396	929							1.95588	-0.02432	1.95593	0.01029							111.856	5418800	111.856	-799807		-343.51	-835919
26.419	1030	26.419	967							1.95594	-0.04055	1.95599	-0.00199							111.893	4827040	111.893	1124540		-343.46	-1052250
26.442	983	26.442	959							1.95599	-0.03809	1.95604	-0.00906							111.93	4780550	111.93	1851260		-343.411	-1232090
26.465	1025	26.465	988							1.95605	-0.02958	1.95609	-0.01254							111.966	4275200	111.966	1443000		-343.361	-1327150
26.488	1050	26.488	1017							1.9561	-0.00831	1.95615	-0.01585							112.003	1959160	112.003	991884		-343.312	-1295000
26.511	1093	26.511	1034							1.95616	0.00154	1.9562	-0.01507							112.04	-1907950	112.04	1232210		-343.262	-1104120
26.534	1062	26.534	1064							1.95621	-0.00874	1.95626	-0.00934							112.077	-5215640	112.077	1731670		-343.213	-738133
26.557	1025	26.557	1094							1.95627	-0.00279	1.95631	-0.0061							112.113	-5894920	112.113	1483170		-343.163	-199012
26.58	1125	26.58	1044							1.95632	0.00597	1.95637	-0.01375							112.15	-3969370	112.15	168840		-343.114	491323
26.603	1167	26.603	1016							1.95638	0.000106216	1.95642	-0.01099							112.187	-1573140	112.187	-1320080		-343.064	1291240
26.626	1149	26.626	1127							1.95643	0.00522	1.95648	0.00131							112.224	-901475	112.224	-1660750		-343.015	2141660
26.649	1151	26.649	1165							1.95648	0.01762	1.95653	-0.00172							112.26	-2199330	112.26	-330594		-342.965	2970310
26.672	1207	26.672	1166							1.95654	0.01177	1.95659	-0.00143							112.297	-3744530	112.297	1961030		-342.916	3697720
26.695	1192	26.695	1210							1.95659	0.00232	1.95664	0.01035							112.334	-3652970	112.334	3975850		-342.866	4244550
26.718	1177	26.718	1211							1.95665	-0.00249	1.95669	0.01506							112.371	-1605130	112.371	4967030		-342.817	4539680
26.741	1329	26.741	1225							1.9567	-0.01007	1.95675	0.00289							112.407	1029300	112.407	5038680		-342.767	4528230
26.764	1286	26.764	1278							1.95676	-0.0124	1.9568	-0.00212							112.444	2427000	112.444	4711960		-342.718	4178780
26.787	1342	26.787	1300							1.95681	-0.01402	1.95686	0.00265							112.481	1562520	112.481	4358220		-342.668	3488920
26.81	1372	26.81	1330							1.95687	-0.0103	1.95691	-0.000623175							112.518	-1372290	112.518	4071360		-342.619	2488540
26.833	1390	26.833	1321							1.95692	-0.01465	1.95697	0.01513							112.555	-5158350	112.555	3873020		-342.569	1240120
26.856	1436	26.856	1360							1.95698	-0.03248	1.95702	0.02696							112.591	-7901960	112.591	3790190		-342.52	-164080
26.879	1459	26.879	1370							1.95703	-0.03005	1.95708	0.01189							112.628	-7691890	112.628	3686940		-342.47	-1608030
26.902	1462	26.902	1385							1.95709	-0.00939	1.95713	0.01069							112.665	-3831830	112.665	3213750		-342.421	-2960780
26.925	1481	26.925	1476							1.95714	0.00275	1.95719	0.01877							112.702	1994870	112.702	2153480		-342.371	-4087430
26.948	1514	26.948	1442							1.95719	-0.00802	1.95724	0.01025							112.738	6068900	112.738	868394		-342.322	-4861420
26.971	1571	26.971	1560							1.95725	-0.02272	1.9573	-0.0037							112.775	5073040	112.775	251285		-342.272	-5176840
26.994	1677	26.994	1546							1.9573	-0.0186	1.95735	-0.01212							112.812	-981951	112.812	1030880		-342.223	-4959660
27.017	1679	27.017	1623							1.95736	-0.02648	1.9574	-0.01015							112.849	-8153320	112.849	3027720		-342.173	-4176610
27.04	1693	27.04	1707							1.95741	-0.03953	1.95746	0.00873							112.885	-11463700	112.885	5128240		-342.124	-2840730
27.063	1817	27.063	1679							1.95747	-0.01514	1.95751	0.01491							112.922	-9118710	112.922	6083390		-342.074	-1012740
27.086	1837	27.086	1746							1.95752	0.00455	1.95757	-0.005							112.959	-4145350	112.959	5429960		-342.025	1202050
27.109	1853	27.109	1760							1.95758	-0.00788	1.95762	-0.01398							112.996	-1629560	112.996	3736500		-341.975	3661330
27.132	1870	27.132	1826							1.95763	-0.0233	1.95768	-0.00745							113.032	-3925280	113.032	2059470		-341.926	6197190
27.155	1866	27.155	1851							1.95769	-0.02675	1.95773	-0.00401							113.069	-8370140	113.069	1201030		-341.876	8630630
27.178	1949	27.178	1860							1.95774	-0.01637	1.95779	0.00274							113.106	-9790760	113.106	1386190		-341.827	10787500
27.201	1883	27.201	1895							1.9578	-0.00489	1.95784	0.01782							113.143	-5454700	113.143	2424700		-341.777	12514900
27.224	2039	27.224	1983							1.95785	-0.00809	1.9579	0.02611							113.179	2297000	113.179	3975510		-341.728	13695200
27.247	2124	27.247	2023							1.9579	-0.01315	1.95795	0.02569							113.216	8250140	113.216	5620350		-341.678	14258400
27.27	2198	27.27	2094							1.95796	-0.00774	1.95801	0.01557							113.253	9151600	113.253	6830530		-341.629	14188600
27.293	2226	27.293	2166							1.95801	-0.00779	1.95806	-0.00537							113.29	6488040	113.29	7064280		-341.579	13526300
27.316	2354	27.316	2186							1.95807	-0.0048	1.95812	-0.02053							113.326	4657540	113.326	6030500		-341.53	12364600
27.339	2358	27.339	2204							1.95812	-0.00308	1.95817	-0.01955							113.363	6507360	113.363	3923480		-341.48	10840200
27.362	2519	27.362	2343							1.95818	-0.01929	1.95822	-0.00799							113.4	10615600	113.4	1456600		-341.431	9120220
27.385	2531	27.385	2416							1.95823	-0.03093	1.95828	-0.00471							113.437	12767100	113.437	-312631		-341.381	7385010
27.408	2553	27.408	2426							1.95829	-0.02558	1.95833	-0.00543							113.473	9953160	113.473	-324980		-341.332	5810000
27.431	2684	27.431	2393							1.95834	-0.00974	1.95839	0.00171							113.51	3024610	113.51	1971040		-341.282	4547640
27.454	2781	27.454	2563							1.9584	-0.00275	1.95844	0.01183							113.547	-4244170	113.547	6074010		-341.232	3711590
27.477	2880	27.477	2551							1.95845	-0.01096	1.9585	0.00507							113.584	-8398750	113.584	10283300		-341.183	3364850
27.5	2879	27.5	2664							1.95851	-0.01249	1.95855	-0.01528							113.62	-8702870	113.62	12409700		-341.133	3513060
27.523	2929	27.523	2761							1.95856	-0.01454	1.95861	-0.01348							113.657	-6842970	113.657	11186900		-341.084	4103990
27.546	3071	27.546	2767							1.95862	-0.0143	1.95866	0.000269496							113.694	-4860990	113.694	7377990		-341.034	5033060
27.569	3123	27.569	2732							1.95867	0.00598	1.95872	0.00117							113.731	-3603400	113.731	3459790		-340.985	6154600
27.592	3023	27.592	2927							1.95872	0.02576	1.95877	-0.00554							113.767	-2881090	113.767	1843210		-340.935	7297730
27.615	3243	27.615	3019							1.95878	0.01995	1.95883	-0.000297471							113.804	-2519000	113.804	3014440		-340.886	8285000
27.638	3276	27.638	2993							1.95883	-0.00476	1.95888	0.01705							113.841	-2760030	113.841	5271050		-340.836	8952100
27.661	3412	27.661	3049							1.95889	-0.02281	1.95894	0.02136							113.878	-3614670	113.878	6356520		-340.787	9166360
27.684	3369	27.684	2987							1.95894	-0.02074	1.95899	0.01324							113.914	-4219410	113.914	5479990		-340.737	8842110
27.707	3549	27.707	3124							1.959	-0.02403	1.95904	0.00342							113.951	-3345420	113.951	3806550		-340.688	7951180
27.73	3539	27.73	3053							1.95905	-0.03809	1.9591	0.00356							113.988	-804734	113.988	3030910		-340.638	6527460
27.753	3715	27.753	3076							1.95911	-0.0271	1.95915	0.00716							114.025	1771400	114.025	3586780		-340.589	4664850
27.776	3621	27.776	3029							1.95916	-0.00763	1.95921	0.00123							114.061	1949240	114.061	4362170		-340.539	2508920
27.799	3655	27.799	3059							1.95922	-0.00144	1.95926	5.83916e-05							114.098	-1302220	114.098	4133780		-340.49	243024
27.822	3675	27.822	3001							1.95927	-0.00191	1.95932	0.00607							114.135	-6241840	114.135	3070310		-340.44	-1929690
27.845	3795	27.845	2977							1.95933	0.00319	1.95937	0.01438							114.172	-9362590	114.172	2603570		-340.391	-3806360
27.868	3851	27.868	3062							1.95938	0.01284	1.95943	0.0237							114.209	-8202530	114.209	3784960		-340.341	-5204610
27.891	3719	27.891	2989							1.95944	0.01143	1.95948	0.02542							114.245	-3583540	114.245	5944180		-340.292	-5980740
27.914	3673	27.914	2825							1.95949	0.01111	1.95954	0.01152							114.282	817254	114.282	7177480		-340.242	-6043930
27.937	3734	27.937	2740							1.95955	0.00519	1.95959	-0.00272							114.319	1393470	114.319	6218390		-340.193	-5365110
27.96	3730	27.96	2756							1.9596	-0.01001	1.95965	-0.00518							114.356	-2394040	114.356	3732890		-340.143	-3979580
27.983	3656	27.983	2627							1.95966	-0.01896	1.9597	-0.0053							114.392	-7536100	114.392	1670380		-340.094	-1983250
28.006	3529	28.006	2492							1.95971	-0.01971	1.95976	0.00309							114.429	-9933830	114.429	1346640		-340.044	476994
28.029	3419	28.029	2458							1.95976	-0.00944	1.95981	0.0164							114.466	-7658370	114.466	2237750		-339.995	3217760
28.052	3391	28.052	2383							1.95982	-0.00351	1.95987	0.01932							114.503	-2239320	114.503	2676720		-339.945	6036680
28.075	3347	28.075	2337							1.95987	-0.01416	1.95992	0.00982							114.539	2934300	114.539	1666580		-339.896	8731290
28.098	3265	28.098	2252							1.95993	-0.01841	1.95998	-0.00908							114.576	5430840	114.576	-50743.5		-339.846	11117100
28.121	3355	28.121	2125							1.95998	-0.01239	1.96003	-0.02127							114.613	5244410	114.613	-675690		-339.797	13042900
28.144	3197	28.144	2178							1.96004	-0.01476	1.96009	-0.02093							114.65	3893720	114.65	974101		-339.747	14402600
28.167	3078	28.167	2054							1.96009	-0.00621	1.96014	-0.01631							114.686	2484180	114.686	4398280		-339.698	15141100
28.19	2878	28.19	1916							1.96015	0.00902	1.96019	-0.01322							114.723	863680	114.723	7804150		-339.648	15255600
28.213	2972	28.213	1868							1.9602	-0.00457	1.96025	-0.01764							114.76	-1459790	114.76	9419940		-339.599	14790900
28.236	2786	28.236	1797							1.96026	-0.01292	1.9603	-0.02807							114.797	-4026680	114.797	8581660		-339.549	13831000
28.259	2546	28.259	1787							1.96031	-0.00626	1.96036	-0.03529							114.833	-5530760	114.833	5931990		-339.5	12486900
28.282	2560	28.282	1679							1.96037	-0.0211	1.96041	-0.02837							114.87	-5367880	114.87	2881950		-339.45	10883200
28.305	2541	28.305	1682							1.96042	-0.02668	1.96047	-0.01258							114.907	-4777260	114.907	824035		-339.401	9144370
28.328	2449	28.328	1596							1.96048	-0.01289	1.96052	-0.000550797							114.944	-5891540	114.944	456114		-339.351	7383300
28.351	2312	28.351	1532							1.96053	-0.007	1.96058	0.00125							114.98	-9286270	114.98	1448760		-339.302	5691670
28.374	2259	28.374	1555							1.96059	-0.0046	1.96063	-0.000406039							115.017	-12608900	115.017	2689550		-339.252	4134740
28.397	2050	28.397	1505							1.96064	0.00177	1.96069	-0.000942848							115.054	-12207500	115.054	3125380		-339.203	2749760
28.42	2055	28.42	1510							1.9607	0.01762	1.96074	-0.00893							115.091	-6697420	115.091	2682730		-339.153	1548180
28.443	1891	28.443	1422							1.96075	0.03105	1.9608	-0.00615							115.127	940085	115.127	2417400		-339.104	521032
28.466	1843	28.466	1365							1.96081	0.02368	1.96085	0.00493							115.164	5204520	115.164	3549040		-339.054	-353769
28.489	1797	28.489	1353							1.96086	0.00993	1.96091	-0.000200966							115.201	2688240	115.201	6128880		-339.005	-1103280
28.512	1774	28.512	1335							1.96092	-0.00272	1.96096	-0.00827							115.238	-4632720	115.238	8660660		-338.955	-1751860
28.535	1671	28.535	1300							1.96097	-0.01474	1.96102	-0.00388							115.274	-10663500	115.274	9242230		-338.906	-2315240
28.558	1600	28.558	1200							1.96102	-0.01547	1.96107	0.00666							115.311	-10189000	115.311	7292790		-338.856	-2796930
28.581	1586	28.581	1226							1.96108	-0.01364	1.96113	0.00719							115.348	-3295490	115.348	4208910		-338.807	-3187730
28.604	1593	28.604	1207							1.96113	-0.01664	1.96118	0.00524							115.385	4670970	115.385	2220960		-338.757	-3468020
28.627	1473	28.627	1207							1.96119	-0.0122	1.96124	0.00674							115.421	7511800	115.421	2462260		-338.708	-3612610
28.65	1508	28.65	1171							1.96124	0.00195	1.96129	-0.00112							115.458	3053940	115.458	4054600		-338.658	-3597200
28.673	1385	28.673	1133							1.9613	0.00496	1.96135	0.00028156							115.495	-5549510	115.495	5029580		-338.609	-3405330
28.696	1405	28.696	1115							1.96135	-0.00847	1.9614	0.01409							115.532	-12738300	115.532	4148080		-338.559	-3034790
28.719	1328	28.719	1137							1.96141	-0.01477	1.96146	0.0106							115.568	-14736100	115.568	1919230		-338.51	-2502150
28.742	1315	28.742	1050							1.96146	-0.00754	1.96151	0.000372033							115.605	-11523100	115.605	27175.9		-338.46	-1844740
28.765	1249	28.765	1096							1.96152	0.00197	1.96157	-0.00126							115.642	-5658550	115.642	-98719		-338.411	-1119460
28.788	1291	28.788	1088							1.96157	-0.000864866	1.96162	0.000414254							115.679	154059	115.679	1765800		-338.361	-398356
28.811	1223	28.811	1051							1.96163	-0.01386	1.96167	0.00964							115.716	4411270	115.716	4769250		-338.312	238636
28.834	1196	28.834	1053							1.96168	-0.02334	1.96173	0.01082							115.752	6549650	115.752	7714360		-338.262	712914
28.857	1119	28.857	980							1.96174	-0.03177	1.96178	-0.00578							115.789	6345080	115.789	9620210		-338.213	957288
28.88	1177	28.88	1004							1.96179	-0.02757	1.96184	-0.01708							115.826	4090580	115.826	9900130		-338.163	925567
28.903	1124	28.903	923							1.96185	-0.01287	1.96189	-0.00149							115.863	1135300	115.863	8454950		-338.114	600327
28.926	1088	28.926	968							1.9619	-0.00336	1.96195	0.01584							115.899	-478279	115.899	5840920		-338.064	-2329
28.949	1051	28.949	928							1.96196	-0.00296	1.962	0.01							115.936	436343	115.936	3223570		-338.015	-831834
28.972	991	28.972	895							1.96201	-0.01591	1.96206	0.00623							115.973	2864470	115.973	1822700		-337.965	-1806400
28.995	1025	28.995	914							1.96207	-0.02399	1.96211	0.01326							116.01	4122440	116.01	2113760		-337.916	-2820300
29.018	974	29.018	886							1.96212	-0.01374	1.96217	0.01247							116.046	2218490	116.046	3486260		-337.866	-3754560
29.041	956	29.041	902							1.96218	-0.00375	1.96222	0.00876							116.083	-2041180	116.083	4749250		-337.817	-4489850
29.064	1001	29.064	848							1.96223	-0.01067	1.96228	0.01523							116.12	-5374810	116.12	5073240		-337.767	-4920150
29.087	936	29.087	841							1.96229	-0.01178	1.96233	0.01946							116.157	-4753810	116.157	4535770		-337.718	-4965640
29.11	983	29.11	861							1.96234	-0.0059	1.96239	0.00871							116.193	-125828	116.193	3854060		-337.668	-4583130
29.133	1020	29.133	876							1.9624	-0.02216	1.96244	-0.00571							116.23	5419520	116.23	3670240		-337.619	-3772780
29.156	929	29.156	844							1.96245	-0.03521	1.9625	-0.01337							116.267	8230720	116.267	4072510		-337.569	-2580130
29.179	938	29.179	921							1.96251	-0.01945	1.96255	-0.02024							116.304	7024860	116.304	4656300		-337.52	-1093120
29.202	856	29.202	848							1.96256	0.0043	1.96261	-0.02225							116.34	3513040	116.34	4890510		-337.47	565871
29.225	847	29.225	796							1.96262	-0.00504	1.96266	-0.01628							116.377	361662	116.377	4435580		-337.421	2251980
29.248	841	29.248	816							1.96267	-0.02639	1.96272	-0.02426							116.414	-1327560	116.414	3311620		-337.371	3812650
29.271	848	29.271	828							1.96273	-0.01788	1.96277	-0.03155							116.451	-2553510	116.451	1963790		-337.322	5103630
29.294	871	29.294	845							1.96278	-0.01287	1.96283	-0.01588							116.487	-4665320	116.487	1143870		-337.272	6004260
29.317	831	29.317	828							1.96284	-0.00847	1.96288	0.000878685							116.524	-7365150	116.524	1472810		-337.223	6430440
29.34	800	29.34	777							1.96289	0.0096	1.96294	0.00772							116.561	-8659150	116.561	2867880		-337.173	6343630
29.363	826	29.363	776							1.96295	0.01049	1.96299	0.00363							116.598	-6846780	116.598	4393940		-337.124	5754860
29.386	775	29.386	751							1.963	0.000866193	1.96305	-0.00377							116.634	-2491000	116.634	4912450		-337.074	4723300
29.409	766	29.409	760							1.96306	0.0054	1.9631	-0.000345723							116.671	1691590	116.671	4112110		-337.025	3349400
29.432	798	29.432	787							1.96311	0.00443	1.96316	0.00669							116.708	2998420	116.708	2923830		-336.975	1763470
29.455	791	29.455	789							1.96317	-0.0108	1.96321	-0.00482							116.745	930822	116.745	2754100		-336.926	110944
29.478	767	29.478	776							1.96322	-0.02	1.96327	-0.01312							116.781	-2582250	116.781	4147270		-336.876	-1464020
29.501	739	29.501	723							1.96328	-0.02171	1.96332	0.00735							116.818	-4970670	116.818	6180140		-336.827	-2834640
29.524	820	29.524	761							1.96333	-0.0241	1.96338	0.02241							116.855	-5046250	116.855	7244460		-336.777	-3905580
29.547	804	29.547	763							1.96339	-0.02916	1.96343	0.01266							116.892	-3525250	116.892	6474710		-336.728	-4623210
29.57	778	29.57	770							1.96344	-0.02416	1.96349	0.000275528							116.928	-1940310	116.928	4421440		-336.678	-4981070
29.593	735	29.593	724							1.9635	-0.01828	1.96354	0.00311							116.965	-1261830	116.965	2389250		-336.628	-5019740
29.616	713	29.616	709							1.96355	-0.01612	1.9636	0.01456							117.002	-1446790	117.002	1252870		-336.579	-4821310
29.639	719	29.639	704							1.96361	-0.00789	1.96365	0.00737							117.039	-1917580	117.039	989286		-336.529	-4498900
29.662	751	29.662	710							1.96366	-0.01588	1.96371	-0.01152							117.075	-2125670	117.075	1204200		-336.48	-4182670
29.685	709	29.685	677							1.96371	-0.02362	1.96376	-0.01256							117.112	-1677940	117.112	1777770		-336.43	-4003800
29.708	708	29.708	719							1.96377	-0.000328057	1.96382	-0.00934							117.149	-323999	117.149	2778470		-336.381	-4078280
29.731	736	29.731	659							1.96382	0.01729	1.96387	-0.00428							117.186	1746930	117.186	3898870		-336.331	-4492420
29.754	678	29.754	669							1.96388	0.01283	1.96393	0.00878							117.222	3542710	117.222	4401230		-336.282	-5291730
29.777	665	29.777	733							1.96393	0.00187	1.96398	0.00526							117.259	3587350	117.259	3918250		-336.232	-6474230
29.8	704	29.8	716							1.96399	-0.01755	1.96404	-0.00634							117.296	1100940	117.296	3185590		-336.183	-7989220
29.823	743	29.823	681							1.96404	-0.02958	1.96409	0.000335844							117.333	-2938690	117.333	3558900		-336.133	-9741320
29.846	680	29.846	709							1.9641	-0.021	1.96415	0.00623							117.37	-6137100	117.37	5496730		-336.084	-11599400
29.869	662	29.869	677							1.96415	-0.00928	1.9642	-0.000966975							117.406	-6497230	117.406	7616640		-336.034	-13409500
29.892	697	29.892	672							1.96421	-0.00913	1.96426	-0.00951							117.443	-4149250	117.443	7638260		-335.985	-15009900
29.915	649	29.915	681							1.96426	-0.01199	1.96431	-0.01383							117.48	-1234930	117.48	4566440		-335.935	-16247100
29.938	637	29.938	699							1.96432	-0.00816	1.96437	-0.00776							117.517	113419	117.517	-64794.3		-335.886	-16990700
29.961	663	29.961	604							1.96437	0.00232	1.96442	0.00704							117.553	-218787	117.553	-3322070		-335.836	-17146200
29.984	653	29.984	647							1.96443	0.00656	1.96448	0.02084							117.59	-369904	117.59	-3402260		-335.787	-16663000
30.007	628	30.007	640							1.96448	0.00327	1.96453	0.02182							117.627	1400140	117.627	-1078480		-335.737	-15538900
30.03	549	30.03	628							1.96454	0.00404	1.96459	0.01614							117.664	4691920	117.664	1327280		-335.688	-13819500
30.053	603	30.053	645							1.9646	0.00108	1.96464	0.01704							117.7	7138140	117.7	2267590		-335.638	-11593000
30.076	612	30.076	633							1.96465	-0.00267	1.9647	0.01554							117.737	6633140	117.737	2150250		-335.589	-8981270
30.099	642	30.099	598							1.96471	-0.01012	1.96475	6.44232e-05							117.774	3363600	117.774	2322140		-335.539	-6128930
30.122	602	30.122	633							1.96476	-0.02158	1.96481	-0.01891							117.811	-378920	117.811	3233950		-335.49	-3190380
30.145	613	30.145	608							1.96482	-0.00784	1.96486	-0.01435							117.847	-2296900	117.847	3923460		-335.44	-317651
30.168	596	30.168	608							1.96487	-0.00117	1.96492	0.00453							117.884	-1886580	117.884	3281140		-335.391	2350600
30.191	644	30.191	619							1.96493	-0.01793	1.96497	-0.000231124							117.921	-252240	117.921	1471490		-335.341	4697670
30.214	652	30.214	619							1.96498	-0.02062	1.96503	-0.01857							117.958	1484060	117.958	-206779		-335.292	6634290
30.237	584	30.237	675							1.96504	-0.01385	1.96508	-0.01745							117.994	3167090	117.994	-803350		-335.242	8101020
30.26	579	30.26	616							1.96509	-0.00469	1.96514	-0.00137							118.031	4946300	118.031	-711542		-335.193	9067480
30.283	602	30.283	630							1.96515	0.00109	1.96519	-0.000357786							118.068	6075520	118.068	-977603		-335.143	9529270
30.306	574	30.306	628							1.9652	-0.00436	1.96525	-0.00918							118.105	5030110	118.105	-1818410		-335.094	9503210
30.329	616	30.329	595							1.96526	-0.0093	1.9653	-0.00483							118.141	1190600	118.141	-2247780		-335.044	9021790
30.352	581	30.352	592							1.96531	-0.00255	1.96536	0.00674							118.178	-3771000	118.178	-1369590		-334.995	8127960
30.375	576	30.375	609							1.96537	-0.00403	1.96541	0.01244							118.215	-6715300	118.215	216651		-334.945	6870750
30.398	570	30.398	658							1.96542	-0.00354	1.96547	0.0115							118.252	-5683850	118.252	750222		-334.896	5302450
30.421	596	30.421	686							1.96548	0.00379	1.96552	0.01066							118.288	-1818640	118.288	-767145		-334.846	3477360
30.444	559	30.444	625							1.96553	-0.00175	1.96558	0.00512							118.325	1512020	118.325	-3217570		-334.797	1452130
30.467	587	30.467	604							1.96559	0.00502	1.96563	0.00541							118.362	1648260	118.362	-4305250		-334.747	-712777
30.49	576	30.49	635							1.96564	0.01123	1.96569	0.01542							118.399	-1233360	118.399	-2959080		-334.698	-2951270
30.513	580	30.513	614							1.9657	0.00093254	1.96574	0.00707							118.435	-4791570	118.435	-583326		-334.648	-5189900
30.536	585	30.536	609							1.96575	-0.00324	1.9658	-0.0093							118.472	-7033580	118.472	335868		-334.599	-7347250
30.559	626	30.559	547							1.96581	0.00529	1.96585	-0.00515							118.509	-7911890	118.509	-1145080		-334.549	-9334780
30.582	582	30.582	574							1.96586	0.01118	1.96591	0.01054							118.546	-8522380	118.546	-3422370		-334.5	-11059600
30.605	588	30.605	614							1.96592	0.00389	1.96596	0.01256							118.582	-9229920	118.582	-4083520		-334.45	-12429400
30.628	587	30.628	617							1.96597	-0.01659	1.96602	-0.0022							118.619	-9142060	118.619	-2480560		-334.401	-13358300
30.651	565	30.651	558							1.96603	-0.0296	1.96607	-0.00835							118.656	-7516760	118.656	-286918		-334.351	-13774700
30.674	543	30.674	580							1.96608	-0.01958	1.96613	-0.00632							118.693	-5169240	118.693	558704		-334.302	-13628400
30.697	552	30.697	559							1.96614	-0.01517	1.96618	-0.00508							118.729	-3833020	118.729	159406		-334.252	-12897700
30.72	550	30.72	613							1.96619	-0.01582	1.96624	-0.00705							118.766	-3992260	118.766	530179		-334.203	-11594000
30.743	551	30.743	608							1.96625	-0.0133	1.96629	-0.00113							118.803	-3892670	118.803	3078380		-334.153	-9764600
30.766	570	30.766	545							1.9663	-0.01012	1.96635	0.00598							118.84	-1406830	118.84	6520730		-334.104	-7491610
30.789	589	30.789	568							1.96636	-0.00243	1.9664	-0.01261							118.877	2972570	118.877	7747890		-334.054	-4888020
30.812	538	30.812	586							1.96641	-0.00154	1.96646	-0.01041							118.913	5605650	118.913	4981730		-334.005	-2090330
30.835	521	30.835	579							1.96647	-0.00209	1.96651	0.00476							118.95	3004910	118.95	-37746.8		-333.955	751509
30.858	516	30.858	520							1.96652	0.00417	1.96657	-0.0053							118.987	-3997160	118.987	-3279040		-333.906	3485790
30.881	513	30.881	520							1.96658	0.0099	1.96662	-0.00213							119.024	-9805720	119.024	-2043490		-333.856	5971410
30.904	537	30.904	587							1.96663	0.00233	1.96668	0.00598							119.06	-8597910	119.06	2517810		-333.807	8089570
30.927	513	30.927	574							1.96669	-0.01053	1.96674	0.0049							119.097	138569	119.097	6441990		-333.757	9753540
30.95	523	30.95	547							1.96674	-0.01273	1.96679	0.00428							119.134	10597700	119.134	6513630		-333.708	10915500
30.973	535	30.973	567							1.9668	-0.00649	1.96685	-0.00518							119.171	15565500	119.171	2955280		-333.658	11569400
30.996	517	30.996	580							1.96685	-0.00454	1.9669	-0.01293							119.207	12738900	119.207	-1118160		-333.609	11750600
31.019	534	31.019	584							1.96691	-0.01488	1.96696	-0.00444							119.244	6374360	119.244	-2674060		-333.559	11530300
31.042	538	31.042	570							1.96696	-0.02213	1.96701	0.00798							119.281	2745720	119.281	-1249380		-333.51	11007200
31.065	553	31.065	542							1.96702	-0.01049	1.96707	0.000601233							119.318	4023440	119.318	1141420		-333.46	10297100
31.088	547	31.088	580							1.96707	-0.00249	1.96712	-0.01449							119.354	6637660	119.354	2159250		-333.411	9520080
31.111	498	31.111	550							1.96713	-0.01094	1.96718	-0.00954							119.391	5505320	119.391	1114380		-333.361	8788720
31.134	540	31.134	571							1.96718	-0.01023	1.96723	-0.000273345							119.428	-428535	119.428	-883048		-333.312	8196750
31.157	597	31.157	529							1.96724	-0.00627	1.96729	-0.00278							119.465	-6993850	119.465	-2298000		-333.262	7810740
31.18	541	31.18	546							1.9673	-0.01365	1.96734	-0.00814							119.501	-8940890	119.501	-2515780		-333.213	7664910
31.203	516	31.203	546							1.96735	-0.02075	1.9674	-0.01667							119.538	-5005470	119.538	-2016490		-333.163	7759640
31.226	534	31.226	546							1.96741	-0.01106	1.96745	-0.01547							119.575	1151570	119.575	-1563220		-333.114	8063840
31.249	527	31.249	533							1.96746	0.00269	1.96751	-0.00232							119.612	4676330	119.612	-1413140		-333.064	8520720
31.272	496	31.272	563							1.96752	-0.00284	1.96756	-0.00314							119.648	3809670	119.648	-1270210		-333.015	9056100
31.295	474	31.295	556							1.96757	-0.01732	1.96762	-0.01181							119.685	562796	119.685	-836884		-332.965	9588320
31.318	540	31.318	591							1.96763	-0.01353	1.96767	-0.01445							119.722	-2212670	119.722	-298857		-332.916	10038500
31.341	479	31.341	551							1.96768	-0.000207426	1.96773	-0.0121							119.759	-3711870	119.759	-264203		-332.866	10339800
31.364	498	31.364	527							1.96774	0.000956667	1.96778	-0.00457							119.795	-5031160	119.795	-1247900		-332.817	10445400
31.387	527	31.387	536							1.96779	-0.00111	1.96784	-0.00219							119.832	-6791520	119.832	-3184740		-332.767	10332400
31.41	499	31.41	507							1.96785	-0.01061	1.96789	0.00351							119.869	-7792700	119.869	-5386760		-332.718	10004400
31.433	479	31.433	516							1.9679	-0.01652	1.96795	0.00632							119.906	-6436690	119.906	-6962550		-332.668	9489420
31.456	452	31.456	504							1.96796	-0.01534	1.968	-0.00234							119.942	-3139520	119.942	-7342520		-332.619	8835600
31.479	481	31.479	487							1.96801	-0.01521	1.96806	-0.01345							119.979	-602430	119.979	-6509180		-332.569	8104530
31.502	523	31.502	512							1.96807	-0.00196	1.96811	-0.03227							120.016	-1213580	120.016	-4837720		-332.52	7363280
31.525	473	31.525	547							1.96812	0.00683	1.96817	-0.03182							120.053	-4265000	120.053	-2813660		-332.47	6676050
31.548	507	31.548	493							1.96818	0.0105	1.96823	-0.02074							120.089	-6189370	120.089	-937959		-332.421	6096640
31.571	519	31.571	540							1.96823	0.01071	1.96828	-0.02421							120.126	-3947540	120.126	200678		-332.371	5662320
31.594	474	31.594	513							1.96829	-0.00892	1.96834	-0.01967							120.163	1701120	120.163	22881		-332.322	5390110
31.617	462	31.617	520							1.96834	-0.02078	1.96839	-0.01606							120.2	6392090	120.2	-1586190		-332.272	5275510
31.64	484	31.64	513							1.9684	-0.02113	1.96845	-0.01254							120.236	5805920	120.236	-3822150		-332.223	5293910
31.663	501	31.663	502							1.96845	-0.02192	1.9685	-0.00202							120.273	-567211	120.273	-5166040		-332.173	5404360
31.686	496	31.686	516							1.96851	-0.01502	1.96856	0.000100613							120.31	-8911100	120.31	-4424460		-332.124	5555010
31.709	480	31.709	500							1.96857	-0.02208	1.96861	0.00125							120.347	-14071900	120.347	-1841130		-332.074	5689680
31.732	529	31.732	536							1.96862	-0.03081	1.96867	0.000372033							120.383	-13281200	120.383	852363		-332.025	5754590
31.755	517	31.755	516							1.96868	-0.00587	1.96872	-0.00814							120.42	-7651000	120.42	1748010		-331.975	5704470
31.778	491	31.778	540							1.96873	0.01277	1.96878	-0.00719							120.457	-809617	120.457	365280		-331.925	5507530
31.801	467	31.801	488							1.96879	-0.00479	1.96883	0.000528854							120.494	3662560	120.494	-1989770		-331.876	5148450
31.824	468	31.824	487							1.96884	-0.03021	1.96889	-0.00105							120.531	4037420	120.531	-3531390		-331.826	4629590
31.847	486	31.847	516							1.9689	-0.03733	1.96894	0.00857							120.567	804297	120.567	-3699690		-331.777	3970070
31.87	433	31.87	478							1.96895	-0.01853	1.969	0.00787							120.604	-3945510	120.604	-3521590		-331.727	3203210
31.893	451	31.893	493							1.96901	0.0011	1.96905	-0.00947							120.641	-7567770	120.641	-4248780		-331.678	2372580
31.916	487	31.916	513							1.96906	0.00189	1.96911	-0.01054							120.678	-8142030	120.678	-5737870		-331.628	1527490
31.939	465	31.939	465							1.96912	0.00407	1.96916	-0.0198							120.714	-5631590	120.714	-6369100		-331.579	718186
31.962	447	31.962	488							1.96917	0.01065	1.96922	-0.0298							120.751	-2127550	120.751	-4681280		-331.529	-8389
31.985	421	31.985	476							1.96923	0.01135	1.96928	-0.02092							120.788	-580141	120.788	-1030150		-331.48	-612080
32.008	422	32.008	465							1.96928	0.01346	1.96933	-0.0165							120.825	-2602280	120.825	2505240		-331.43	-1061790
32.031	455	32.031	512							1.96934	0.0017	1.96939	-0.01787							120.861	-7045300	120.861	3915140		-331.381	-1336600
32.054	460	32.054	465							1.96939	-0.01892	1.96944	-0.00543							120.898	-10734000	120.898	2929480		-331.331	-1425680
32.077	442	32.077	434							1.96945	-0.01699	1.9695	0.00563							120.935	-10973100	120.935	945932		-331.282	-1327420
32.1	465	32.1	450							1.9695	0.00151	1.96955	0.00105							120.972	-7774020	120.972	-508357		-331.232	-1047900
32.123	444	32.123	489							1.96956	0.00949	1.96961	-0.00125							121.008	-3857180	121.008	-1041570		-331.183	-599234
32.146	428	32.146	451							1.96962	-0.00656	1.96966	-0.00408							121.045	-2369100	121.045	-1184850		-331.133	1966
32.169	400	32.169	435							1.96967	-0.02606	1.96972	-0.01077							121.082	-4228790	121.082	-1294790		-331.084	735726
32.192	435	32.192	451							1.96973	-0.01592	1.96977	-0.01388							121.119	-7309050	121.119	-1083800		-331.034	1579330
32.215	425	32.215	464							1.96978	0.00297	1.96983	-0.01736							121.155	-8089580	121.155	-318542		-330.985	2507420
32.238	415	32.238	451							1.96984	-0.01205	1.96988	-0.01549							121.192	-4421130	121.192	376016		-330.935	3491790
32.261	449	32.261	452							1.96989	-0.02757	1.96994	-0.01149							121.229	2738730	121.229	-112020		-330.886	4501000
32.284	409	32.284	430							1.96995	-0.01514	1.96999	-0.00957							121.266	9854350	121.266	-2041180		-330.836	5500180
32.307	415	32.307	415							1.97	-0.00736	1.97005	0.00214							121.302	13134800	121.302	-4105520		-330.787	6451340
32.33	433	32.33	444							1.97006	-0.00844	1.9701	0.01865							121.339	10971500	121.339	-4449570		-330.737	7314270
32.353	411	32.353	451							1.97011	-0.00477	1.97016	0.02176							121.376	4842910	121.376	-2536780		-330.688	8048280
32.376	427	32.376	462							1.97017	-0.00653	1.97022	0.00943							121.413	-1844850	121.413	166650		-330.638	8614650
32.399	399	32.399	489							1.97022	-0.00641	1.97027	-0.00152							121.449	-6090800	121.449	1597540		-330.589	8979630
32.422	406	32.422	459							1.97028	0.00929	1.97033	0.000872653							121.486	-7125280	121.486	1192920		-330.539	9117670
32.445	437	32.445	451							1.97033	0.0168	1.97038	0.0083							121.523	-6444840	121.523	400003		-330.49	9014400
32.468	449	32.468	446							1.97039	0.00379	1.97044	0.000142834							121.56	-6142310	121.56	969155		-330.44	8669050
32.491	447	32.491	449							1.97045	-0.0091	1.97049	-0.01085							121.596	-6962640	121.596	2843750		-330.391	8095690
32.514	432	32.514	471							1.9705	-0.01609	1.97055	-0.00691							121.633	-7720440	121.633	3986150		-330.341	7323230
32.537	433	32.537	461							1.97056	-0.02355	1.9706	-0.0055							121.67	-6526860	121.67	2433570		-330.292	6393710
32.56	421	32.56	449							1.97061	-0.02518	1.97066	-0.01208							121.707	-2681560	121.707	-1543030		-330.242	5359270
32.583	404	32.583	453							1.97067	-0.02492	1.97071	-0.01535							121.743	2474330	121.743	-5463270		-330.193	4277750
32.606	434	32.606	481							1.97072	-0.01713	1.97077	-0.01325							121.78	6455850	121.78	-6855110		-330.143	3207470
32.629	412	32.629	490							1.97078	-0.00389	1.97082	-0.01243							121.817	7409870	121.817	-5425150		-330.094	2201860
32.652	404	32.652	442							1.97083	-0.00541	1.97088	-0.00773							121.854	5234670	121.854	-3081770		-330.044	1304360
32.675	421	32.675	452							1.97089	-0.01307	1.97094	-0.00448							121.89	1314580	121.89	-1977710		-329.995	544415
32.698	422	32.698	449							1.97094	-0.01698	1.97099	-0.01122							121.927	-2540000	121.927	-2645400		-329.945	-65011
32.721	416	32.721	450							1.971	-0.01944	1.97105	-0.01637							121.964	-4895140	121.964	-3932140		-329.896	-527976
32.744	401	32.744	401							1.97105	-0.00843	1.9711	-0.01976							122.001	-4885830	122.001	-4441380		-329.846	-864090
32.767	404	32.767	440							1.97111	0.000570646	1.97116	-0.02592							122.038	-2292330	122.038	-3809910		-329.797	-1105130
32.79	385	32.79	444							1.97117	-0.01578	1.97121	-0.02113							122.074	2086060	122.074	-2694440		-329.747	-1290160
32.813	393	32.813	437							1.97122	-0.01839	1.97127	-0.01121							122.111	6191260	122.111	-1882790		-329.698	-1459620
32.836	440	32.836	408							1.97128	-0.01098	1.97132	-0.01606							122.148	7437030	122.148	-1665490		-329.648	-1649390
32.859	398	32.859	453							1.97133	-0.0274	1.97138	-0.01154							122.185	4442160	122.185	-1926670		-329.599	-1885290
32.882	420	32.882	421							1.97139	-0.03849	1.97143	-0.000816185							122.221	-1498880	122.221	-2447710		-329.549	-2178950
32.905	424	32.905	402							1.97144	-0.02137	1.97149	-0.00875							122.258	-6748150	122.258	-2888660		-329.5	-2525630
32.928	388	32.928	404							1.9715	-0.00511	1.97154	-0.01013							122.295	-7650230	122.295	-2657520		-329.45	-2904190
32.951	413	32.951	452							1.97155	-0.01529	1.9716	0.00588							122.332	-3201550	122.332	-1215020		-329.401	-3279460
32.974	373	32.974	442							1.97161	-0.02286	1.97166	0.00996							122.368	4111020	122.368	1257600		-329.351	-3606550
32.997	386	32.997	429							1.97166	-0.00788	1.97171	-0.00522							122.405	10058400	122.405	3639870		-329.302	-3836810
33.02	417	33.02	421							1.97172	-0.00865	1.97177	-0.01463							122.442	11635500	122.442	4644940		-329.252	-3924480
33.043	413	33.043	442							1.97177	-0.02763	1.97182	-0.02363							122.479	8939630	122.479	3980200		-329.203	-3833350
33.066	446	33.066	414							1.97183	-0.02568	1.97188	-0.0219							122.515	4653640	122.515	2641110		-329.153	-3542340
33.089	393	33.089	391							1.97189	-0.00749	1.97193	0.000577106							122.552	1779170	122.552	1877700		-329.104	-3049430
33.112	369	33.112	448							1.97194	0.00177	1.97199	0.00473							122.589	1496550	122.589	1856320		-329.054	-2373250
33.135	390	33.135	478							1.972	0.000148437	1.97204	0.000727895							122.626	2696960	122.626	1502130		-329.005	-1552000
33.158	401	33.158	415							1.97205	-0.00603	1.9721	0.01266							122.662	3312010	122.662	-209097		-328.955	-639882
33.181	399	33.181	457							1.97211	-0.01653	1.97215	0.0093							122.699	2230630	122.699	-2866950		-328.906	298656
33.204	403	33.204	448							1.97216	-0.0178	1.97221	-0.01049							122.736	243968	122.736	-4710480		-328.856	1196160
33.227	421	33.227	430							1.97222	-0.01277	1.97227	-0.01095							122.773	-745858	122.773	-4222270		-328.807	1989950
33.25	388	33.25	408							1.97227	-0.00254	1.97232	-0.000749838							122.809	378736	122.809	-1656720		-328.757	2629530
33.273	392	33.273	418							1.97233	0.00982	1.97238	0.00418							122.846	2606610	122.846	1040680		-328.708	3082550
33.296	394	33.296	408							1.97238	0.00491	1.97243	-0.00845							122.883	3411520	122.883	1842360		-328.658	3338550
33.319	396	33.319	436							1.97244	-0.00324	1.97249	-0.02799							122.92	1118220	122.92	234703		-328.609	3409970
33.342	362	33.342	417							1.9725	-0.00344	1.97254	-0.02133							122.956	-2993640	122.956	-2571360		-328.559	3330210
33.365	391	33.365	394							1.97255	0.00418	1.9726	-0.02342							122.993	-5103800	122.993	-4749740		-328.51	3148870
33.388	371	33.388	380							1.97261	0.01439	1.97265	-0.03404							123.03	-2014050	123.03	-5127290		-328.46	2924850
33.411	359	33.411	418							1.97266	0.01438	1.97271	-0.01599							123.067	5493860	123.067	-3678720		-328.411	2718080
33.434	412	33.434	412							1.97272	0.00103	1.97276	0.0059							123.103	12446600	123.103	-1280320		-328.361	2580980
33.457	426	33.457	367							1.97277	-0.01414	1.97282	0.00511							123.14	13452400	123.14	757306		-328.312	2550840
33.48	360	33.48	415							1.97283	-0.01394	1.97288	-0.01273							123.177	7446230	123.177	1163280		-328.262	2644090
33.503	381	33.503	413							1.97288	-0.00864	1.97293	-0.01619							123.214	-1029480	123.214	-694371		-328.213	2853330
33.526	398	33.526	376							1.97294	-0.00805	1.97299	0.00599							123.25	-5586180	123.25	-4240850		-328.163	3147640
33.549	355	33.549	438							1.973	-0.00895	1.97304	0.01628							123.287	-3597190	123.287	-7762060		-328.114	3476280
33.572	390	33.572	402							1.97305	-0.00609	1.9731	0.00447							123.324	1562480	123.324	-9439460		-328.064	3775260
33.595	333	33.595	437							1.97311	0.01167	1.97315	0.00502							123.361	3835140	123.361	-8689390		-328.015	3976240
33.618	380	33.618	438							1.97316	0.02603	1.97321	0.00623							123.397	219267	123.397	-6560660		-327.965	4016520
33.641	396	33.641	453							1.97322	0.00925	1.97326	-0.01587							123.434	-6566380	123.434	-4690730		-327.916	3848880
33.664	365	33.664	421							1.97327	-0.00725	1.97332	-0.02986							123.471	-10918800	123.471	-3797880		-327.866	3449970
33.687	369	33.687	388							1.97333	-0.000490909	1.97338	-0.02079							123.508	-9676570	123.508	-3252140		-327.817	2826140
33.71	355	33.71	380							1.97338	-0.00236	1.97343	-0.01361							123.544	-4645440	123.544	-2144710		-327.767	2015610
33.733	389	33.733	405							1.97344	-0.00967	1.97349	-0.00478							123.581	-152243	123.581	-610418		-327.718	1086820
33.756	400	33.756	414							1.97349	5.79633e-05	1.97354	0.00309							123.618	1415170	123.618	156203		-327.668	132625
33.779	378	33.779	392							1.97355	0.00196	1.9736	-0.00518							123.655	1377390	123.655	-726664		-327.619	-738861
33.802	371	33.802	401							1.97361	-0.01447	1.97365	-0.0079							123.692	2407340	123.692	-2623410		-327.569	-1416010
33.825	390	33.825	400							1.97366	-0.00935	1.97371	-0.00036985							123.728	5128980	123.728	-3800850		-327.52	-1796610
33.848	407	33.848	393							1.97372	0.00906	1.97376	-0.000375881							123.765	7569240	123.765	-3136580		-327.47	-1800570
33.871	407	33.871	410							1.97377	0.01157	1.97382	0.00316							123.802	7801720	123.802	-1299580		-327.421	-1380720
33.894	382	33.894	416							1.97383	0.00593	1.97387	0.01341							123.839	6391990	123.839	-113159		-327.371	-530510
33.917	368	33.917	413							1.97388	0.00257	1.97393	0.01142							123.875	5622210	123.875	-766808		-327.321	712417
33.94	373	33.94	399							1.97394	0.00734	1.97399	0.00438							123.912	6424420	123.912	-2737200		-327.272	2267470
33.963	377	33.963	380							1.97399	0.01009	1.97404	0.0052							123.949	6828010	123.949	-4420100		-327.222	4016990
33.986	385	33.986	376							1.97405	0.000281131	1.9741	-0.000864438							123.986	4086750	123.986	-4626540		-327.173	5816420
34.009	365	34.009	364							1.97411	0.00085413	1.97415	-0.01913							124.022	-1713380	124.022	-3366160		-327.123	7507490
34.032	342	34.032	417							1.97416	0.01659	1.97421	-0.02628							124.059	-6799850	124.059	-1406140		-327.074	8933280
34.055	364	34.055	388							1.97422	0.00827	1.97426	-0.01699							124.096	-7017720	124.096	495469		-327.024	9953230
34.078	372	34.078	401							1.97427	-0.00914	1.97432	-0.00121							124.133	-2014350	124.133	1738430		-326.975	10456700
34.101	375	34.101	398							1.97433	-0.00854	1.97437	0.0035							124.169	4219360	124.169	1650000		-326.925	10373700
34.124	370	34.124	392							1.97438	-0.01125	1.97443	-0.01621							124.206	7194460	124.206	-209100		-326.876	9680670
34.147	397	34.147	387							1.97444	-0.01003	1.97449	-0.03272							124.243	6141270	124.243	-3148190		-326.826	8402700
34.17	370	34.17	402							1.97449	0.00236	1.97454	-0.02187							124.28	4132160	124.28	-5086010		-326.777	6609710
34.193	333	34.193	366							1.97455	0.00929	1.9746	-0.00636							124.316	4102800	124.316	-3928340		-326.727	4408840
34.216	377	34.216	393							1.97461	0.01115	1.97465	-0.00568							124.353	5276080	124.353	303033		-326.678	1933090
34.239	394	34.239	378							1.97466	0.00944	1.97471	-0.00169							124.39	4052450	124.39	4874100		-326.628	-671930
34.262	367	34.262	355							1.97472	0.00297	1.97476	0.00364							124.427	-1545380	124.427	6439770		-326.579	-3262050
34.285	369	34.285	355							1.97477	0.00464	1.97482	-0.00453							124.463	-8844930	124.463	4151410		-326.529	-5707330
34.308	318	34.308	372							1.97483	0.00851	1.97488	-0.00828							124.5	-12512900	124.5	604073		-326.48	-7902560
34.331	349	34.331	391							1.97488	0.01164	1.97493	-0.0046							124.537	-9758600	124.537	-644987		-326.43	-9774210
34.354	344	34.354	384							1.97494	0.01087	1.97499	-0.0091							124.574	-3348740	124.574	1328610		-326.381	-11283200
34.377	342	34.377	394							1.97499	0.000673183	1.97504	-0.01122							124.61	843854	124.61	3833010		-326.331	-12423800
34.4	380	34.4	381							1.97505	0.00336	1.9751	-0.00309							124.647	-595096	124.647	3363450		-326.282	-13218100
34.423	360	34.423	362							1.97511	0.01438	1.97515	0.000263465							124.684	-5492540	124.684	-633528		-326.232	-13708900
34.446	358	34.446	375							1.97516	0.01231	1.97521	-0.00388							124.721	-8413340	124.721	-5009100		-326.183	-13949500
34.469	361	34.469	388							1.97522	-0.00253	1.97526	-0.00434							124.757	-5955590	124.757	-6059540		-326.133	-13994800
34.492	327	34.492	386							1.97527	-0.00433	1.97532	0.00901							124.794	229644	124.794	-3331960		-326.084	-13892200
34.515	346	34.515	378							1.97533	0.01122	1.97538	0.01982							124.831	5347870	124.831	-111772		-326.034	-13676200
34.538	330	34.538	362							1.97538	0.01888	1.97543	0.00564							124.868	5991970	124.868	-91698.4		-325.985	-13364600
34.561	369	34.561	354							1.97544	0.0148	1.97549	-0.01216							124.904	2779150	124.904	-3699190		-325.935	-12959600
34.584	333	34.584	383							1.9755	0.01406	1.97554	-0.01897							124.941	-1005090	124.941	-7812540		-325.886	-12450900
34.607	353	34.607	379							1.97555	-0.000527099	1.9756	-0.0123							124.978	-2770350	124.978	-8959260		-325.836	-11821700
34.63	323	34.63	367							1.97561	-0.02964	1.97565	0.00142							125.015	-2495860	125.015	-6546370		-325.787	-11056900
34.653	371	34.653	385							1.97566	-0.03065	1.97571	-0.00184							125.051	-1759570	125.051	-2933110		-325.737	-10150100
34.676	335	34.676	401							1.97572	-0.01535	1.97577	-0.01127							125.088	-1607460	125.088	-690678		-325.688	-9111050
34.699	376	34.699	393							1.97577	-0.0125	1.97582	-0.01102							125.125	-1689340	125.125	-218385		-325.638	-7969440
34.722	398	34.722	395							1.97583	-0.01454	1.97588	0.00504							125.162	-1220730	125.162	-78268.4		-325.589	-6776410
34.745	333	34.745	373							1.97589	-0.0195	1.97593	0.01963							125.199	-282605	125.199	804202		-325.539	-5602050
34.768	371	34.768	377							1.97594	-0.01778	1.97599	0.0091							125.235	97744.1	125.235	1821200		-325.49	-4529420
34.791	365	34.791	355							1.976	-0.01083	1.97604	-0.00793							125.272	-949677	125.272	1632500		-325.44	-3645680
34.814	323	34.814	420							1.97605	-0.00829	1.9761	-0.00903							125.309	-3139310	125.309	5578.24		-325.391	-3031300
34.837	330	34.837	382							1.97611	-0.00532	1.97615	-0.0024							125.346	-5119030	125.346	-1743580		-325.341	-2748830
34.86	348	34.86	380							1.97616	-0.01584	1.97621	-0.00853							125.382	-5437400	125.382	-2177100		-325.292	-2832680
34.883	344	34.883	391							1.97622	-0.01503	1.97627	-0.01545							125.419	-3519630	125.419	-1269030		-325.242	-3281510
34.906	351	34.906	414							1.97627	0.0074	1.97632	-0.01429							125.456	-79350.6	125.456	-271321		-325.193	-4054300
34.929	376	34.929	385							1.97633	-0.000237583	1.97638	-0.00639							125.493	3080120	125.493	-198865		-325.143	-5071110
34.952	331	34.952	373							1.97639	-0.01735	1.97643	0.00372							125.529	3799800	125.529	-799707		-325.094	-6218560
34.975	323	34.975	360							1.97644	-0.01442	1.97649	-0.00116							125.566	755680	125.566	-1144880		-325.044	-7359810
34.998	345	34.998	375							1.9765	-0.00897	1.97654	-0.01027							125.603	-5384460	125.603	-947712		-324.995	-8348060
35.021	339	35.021	370							1.97655	0.000691278	1.9766	-0.00307							125.64	-11836000	125.64	-912637		-324.945	-9042110
35.044	304	35.044	370							1.97661	-0.00486	1.97666	-0.00343							125.676	-15240600	125.676	-1734690		-324.896	-9322130
35.067	338	35.067	388							1.97666	-0.01409	1.97671	-0.01197							125.713	-14077900	125.713	-3104750		-324.846	-9104020
35.09	333	35.09	363							1.97672	-0.00807	1.97677	0.00472							125.75	-9934290	125.75	-4047270		-324.797	-8350180
35.113	344	35.113	375							1.97678	-0.01304	1.97682	0.01359							125.787	-6222350	125.787	-4183140		-324.747	-7075680
35.136	330	35.136	362							1.97683	-0.01507	1.97688	-0.00329							125.823	-5240320	125.823	-4269090		-324.698	-5348650
35.159	337	35.159	349							1.97689	-0.00532	1.97693	-0.01411							125.86	-6261820	125.86	-5221700		-324.648	-3284760
35.182	370	35.182	370							1.97694	0.00836	1.97699	-0.0177							125.897	-6579230	125.897	-6777740		-324.599	-1036200
35.205	360	35.205	379							1.977	0.02411	1.97705	-0.02109							125.934	-4537400	125.934	-7541150		-324.549	1223610
35.228	353	35.228	356							1.97705	0.01743	1.9771	-0.01587							125.97	-1458260	125.97	-6559730		-324.5	3318120
35.251	358	35.251	338							1.97711	0.00327	1.97716	-0.00626							126.007	-344687	126.007	-4625990		-324.45	5086250
35.274	348	35.274	374							1.97717	0.00506	1.97721	-0.00772							126.044	-2565200	126.044	-3624210		-324.401	6399650
35.297	355	35.297	386							1.97722	0.00961	1.97727	-0.01387							126.081	-5982340	126.081	-4466770		-324.351	7176270
35.32	358	35.32	378							1.97728	0.00497	1.97732	-0.01211							126.117	-6710100	126.117	-5932330		-324.302	7388980
35.343	306	35.343	383							1.97733	-0.01254	1.97738	-0.00176							126.154	-3004060	126.154	-5866240		-324.252	7067820
35.366	323	35.366	396							1.97739	-0.02315	1.97744	0.00141							126.191	2561590	126.191	-3560410		-324.203	6295910
35.389	365	35.389	353							1.97744	-0.01414	1.97749	-0.00246							126.228	4994220	126.228	-689499		-324.153	5199130
35.412	356	35.412	383							1.9775	-0.0119	1.97755	-0.000406039							126.264	1290700	126.264	329518		-324.104	3930960
35.435	338	35.435	353							1.97756	-0.01609	1.9776	-0.0024							126.301	-6699790	126.301	-1142210		-324.054	2654170
35.458	376	35.458	367							1.97761	-0.01919	1.97766	-0.00149							126.338	-13592100	126.338	-3268520		-324.005	1521440
35.481	380	35.481	370							1.97767	-0.02443	1.97772	0.00493							126.375	-14721100	126.375	-3608280		-323.955	657285
35.504	362	35.504	367							1.97772	-0.00866	1.97777	-0.00117							126.411	-9554600	126.411	-1546520		-323.906	143394
35.527	362	35.527	377							1.97778	0.00156	1.97783	-0.01345							126.448	-1555670	126.448	1231350		-323.856	9099
35.55	370	35.55	376							1.97784	-0.00813	1.97788	-0.01369							126.485	4860620	126.485	2543420		-323.807	228187
35.573	360	35.573	353							1.97789	-0.00901	1.97794	-0.00934							126.522	7342540	126.522	1735180		-323.757	722426
35.596	369	35.596	365							1.97795	-0.01487	1.97799	-0.01106							126.558	6331300	126.558	-114672		-323.708	1371390
35.619	339	35.619	392							1.978	-0.01832	1.97805	-0.00415							126.595	3708210	126.595	-1663730		-323.658	2027450
35.642	341	35.642	375							1.97806	-0.00869	1.97811	0.01516							126.632	1166940	126.632	-2575280		-323.609	2534190
35.665	377	35.665	387							1.97811	-0.00845	1.97816	0.02423							126.669	-393235	126.669	-3293020		-323.559	2745980
35.688	351	35.688	364							1.97817	-0.00313	1.97822	0.01211							126.705	-668544	126.705	-3981220		-323.51	2546490
35.711	329	35.711	377							1.97823	-0.00285	1.97827	-0.00404							126.742	186750	126.742	-4177710		-323.46	1863810
35.734	358	35.734	369							1.97828	-0.00999	1.97833	0.00386							126.779	1431910	126.779	-3570850		-323.411	680541
35.757	322	35.757	366							1.97834	-0.00867	1.97838	0.00505							126.816	1921710	126.816	-2725130		-323.361	-962625
35.78	323	35.78	362							1.97839	-0.01685	1.97844	-0.00843							126.853	914353	126.853	-2604420		-323.312	-2969940
35.803	318	35.803	368							1.97845	-0.01097	1.9785	-0.000327629							126.889	-1138330	126.889	-3347200		-323.262	-5200240
35.826	368	35.826	347							1.9785	0.00269	1.97855	0.00605							126.926	-2773250	126.926	-3870120		-323.213	-7481790
35.849	371	35.849	386							1.97856	-0.00144	1.97861	0.00309							126.963	-2701360	126.963	-2999370		-323.163	-9630870
35.872	346	35.872	352							1.97862	-0.0082	1.97866	-0.00475							127	-870639	127	-932539		-323.114	-11471700
35.895	335	35.895	345							1.97867	-0.00742	1.97872	-0.01826							127.036	1673080	127.036	745199		-323.064	-12855600
35.918	333	35.918	434							1.97873	-0.00145	1.97878	-0.0039							127.073	3888670	127.073	684291		-323.015	-13676800
35.941	356	35.941	356							1.97878	0.00594	1.97883	0.02061							127.11	5480060	127.11	-730569		-322.965	-13883900
35.964	371	35.964	393							1.97884	0.01249	1.97889	0.01116							127.147	6446470	127.147	-1749560		-322.916	-13484400
35.987	333	35.987	387							1.9789	0.0074	1.97894	-0.00228							127.183	6194030	127.183	-1151810		-322.866	-12543300
36.01	366	36.01	384							1.97895	-0.0014	1.979	-0.00271							127.22	3696520	127.22	447671		-322.817	-11175200
36.033	341	36.033	393							1.97901	0.00532	1.97905	-0.00333							127.257	-1014100	127.257	1351630		-322.767	-9530240
36.056	356	36.056	358							1.97906	0.01146	1.97911	-0.01356							127.294	-5670770	127.294	715106		-322.717	-7777650
36.079	330	36.079	358							1.97912	-0.00267	1.97917	-0.02626							127.33	-6812530	127.33	-563482		-322.668	-6086470
36.102	374	36.102	372							1.97917	-0.01584	1.97922	-0.02022							127.367	-2785450	127.367	-982151		-322.618	-4607350
36.125	387	36.125	367							1.97923	-0.01549	1.97928	-0.01802							127.404	4052810	127.404	-218388		-322.569	-3456800
36.148	342	36.148	379							1.97929	-0.01099	1.97933	-0.0248							127.441	8575860	127.441	559618		-322.519	-2705910
36.171	353	36.171	376							1.97934	-0.00341	1.97939	-0.01723							127.477	7071260	127.477	195457		-322.47	-2374500
36.194	381	36.194	367							1.9794	-0.00204	1.97945	-0.00431							127.514	630614	127.514	-969743		-322.42	-2431460
36.217	392	36.217	365							1.97945	0.00253	1.9795	-0.00918							127.551	-5718310	127.551	-1446840		-322.371	-2800920
36.24	347	36.24	356							1.97951	0.00937	1.97956	-0.01296							127.588	-7631020	127.588	-403116		-322.321	-3373340
36.263	349	36.263	361							1.97957	-0.000412499	1.97961	-0.00443							127.624	-5440210	127.624	1236320		-322.272	-4020130
36.286	342	36.286	375							1.97962	-0.00886	1.97967	-0.00723							127.661	-3498540	127.661	1761530		-322.222	-4609800
36.309	378	36.309	397							1.97968	-0.00774	1.97972	-0.00718							127.698	-5416380	127.698	632150		-322.173	-5023880
36.332	385	36.332	383							1.97973	-0.00497	1.97978	-0.00966							127.735	-10025000	127.735	-903701		-322.123	-5170430
36.355	384	36.355	385							1.97979	-0.00286	1.97984	-0.02485							127.771	-12357100	127.771	-1318210		-322.074	-4993830
36.378	371	36.378	394							1.97985	-0.00561	1.97989	-0.02454							127.808	-8857470	127.808	-692490		-322.024	-4479690
36.401	337	36.401	400							1.9799	-0.01102	1.97995	-0.01518							127.845	-1524640	127.845	-686143		-321.975	-3654520
36.424	340	36.424	389							1.97996	-0.01337	1.98	-0.0077							127.882	3469280	127.882	-2472230		-321.925	-2580340
36.447	359	36.447	347							1.98001	-0.01018	1.98006	7.64863e-05							127.918	1586010	127.918	-4972660		-321.876	-1345240
36.47	355	36.47	341							1.98007	-0.00573	1.98012	0.00598							127.955	-5572140	127.955	-5569150		-321.826	-51051
36.493	343	36.493	368							1.98012	-0.01643	1.98017	0.00467							127.992	-11632900	127.992	-2753390		-321.777	1199960
36.516	358	36.516	332							1.98018	-0.03465	1.98023	-0.01798							128.029	-11405000	128.029	2070670		-321.727	2317880
36.539	342	36.539	349							1.98024	-0.03264	1.98028	-0.0298							128.065	-5515850	128.065	5641110		-321.678	3235560
36.562	363	36.562	358							1.98029	-0.02564	1.98034	-0.01352							128.102	740437	128.102	5750200		-321.628	3915570
36.585	351	36.585	406							1.98035	-0.03187	1.9804	-0.0124							128.139	2894020	128.139	3071250		-321.579	4352780
36.608	369	36.608	352							1.9804	-0.03165	1.98045	-0.01548							128.176	1404780	128.176	169226		-321.529	4572390
36.631	372	36.631	350							1.98046	-0.0127	1.98051	0.00721							128.212	391712	128.212	-1068090		-321.48	4623870
36.654	325	36.654	347							1.98052	-0.0048	1.98056	0.01826							128.249	2729450	128.249	-870406		-321.43	4571670
36.677	363	36.677	365							1.98057	-0.01313	1.98062	0.00819							128.286	6878970	128.286	-675266		-321.381	4484080
36.7	342	36.7	355							1.98063	-0.01251	1.98068	0.00535							128.323	8652910	128.323	-1251260		-321.331	4421780
36.723	339	36.723	322							1.98068	-0.01021	1.98073	0.00532							128.36	5727580	128.36	-2045460		-321.282	4427730
36.746	332	36.746	351							1.98074	-0.01991	1.98079	-0.00733							128.396	-33412.1	128.396	-2255660		-321.232	4519650
36.769	319	36.769	354							1.9808	-0.03306	1.98084	-0.01334							128.433	-4714850	128.433	-2068100		-321.183	4686330
36.792	360	36.792	359							1.98085	-0.03208	1.9809	0.0039							128.47	-6309900	128.47	-2444140		-321.133	4888100
36.815	310	36.815	366							1.98091	-0.02011	1.98095	0.00872							128.507	-6149290	128.507	-3706970		-321.084	5061550
36.838	320	36.838	373							1.98096	-0.01649	1.98101	-0.00569							128.543	-6585770	128.543	-4692500		-321.034	5127860
36.861	335	36.861	350							1.98102	-0.01535	1.98107	-0.00454							128.58	-7969200	128.58	-3634410		-320.985	5003730
36.884	330	36.884	356							1.98108	-0.00308	1.98112	0.01376							128.617	-8494610	128.617	13900.4		-320.935	4613410
36.907	341	36.907	409							1.98113	0.000214784	1.98118	0.01961							128.654	-6900840	128.654	4706490		-320.886	3900390
36.93	346	36.93	351							1.98119	-0.01077	1.98123	-0.000852375							128.69	-4534940	128.69	7816580		-320.836	2837140
36.953	347	36.953	359							1.98124	-0.01371	1.98129	-0.01573							128.727	-4032100	128.727	7601990		-320.787	1431680
36.976	331	36.976	343							1.9813	-0.00659	1.98135	-0.01148							128.764	-5957950	128.764	4394530		-320.737	-269964
36.999	364	36.999	362							1.98136	-0.00865	1.9814	-0.00941							128.801	-7446900	128.801	186978		-320.688	-2185750
37.022	340	37.022	358							1.98141	-0.01326	1.98146	-0.00348							128.837	-4895080	128.837	-2771880		-320.638	-4203930
37.045	311	37.045	358							1.98147	-0.01529	1.98151	-0.00298							128.874	1828820	128.874	-3222510		-320.589	-6192920
37.068	331	37.068	348							1.98152	-0.01782	1.98157	-0.0195							128.911	8264110	128.911	-1348070		-320.539	-8013760
37.091	338	37.091	340							1.98158	-0.00797	1.98163	-0.03351							128.948	8989710	128.948	1516080		-320.49	-9533480
37.114	339	37.114	340							1.98164	-0.0062	1.98168	-0.03069							128.984	2694440	128.984	3656350		-320.44	-10638100
37.137	313	37.137	336							1.98169	-0.01416	1.98174	-0.0235							129.021	-6321930	129.021	3969400		-320.391	-11243800
37.16	328	37.16	353							1.98175	-0.01057	1.98179	-0.01601							129.058	-11787400	129.058	2678330		-320.341	-11304400
37.183	331	37.183	344							1.9818	-0.00382	1.98185	-0.00521							129.095	-10790300	129.095	1144850		-320.292	-10815700
37.206	340	37.206	325							1.98186	-0.00287	1.98191	-0.01141							129.131	-5870880	129.131	678233		-320.242	-9814750
37.229	330	37.229	325							1.98192	-0.00369	1.98196	-0.00293							129.168	-2276260	129.168	1262300		-320.193	-8375560
37.252	332	37.252	355							1.98197	0.00463	1.98202	0.01624							129.205	-3316030	129.205	1493760		-320.143	-6600780
37.275	371	37.275	322							1.98203	0.01043	1.98207	7.64863e-05							129.242	-8028950	129.242	-10394.7		-320.094	-4611350
37.298	363	37.298	355							1.98208	0.00476	1.98213	-0.01608							129.278	-12632900	129.278	-3069300		-320.044	-2534830
37.321	322	37.321	347							1.98214	-0.00421	1.98219	-0.00787							129.315	-13743500	129.315	-5937920		-319.995	-493873
37.344	330	37.344	386							1.9822	-0.00483	1.98224	0.00514							129.352	-10478900	129.352	-6983090		-319.945	1403750
37.367	342	37.367	354							1.98225	-0.00203	1.9823	0.00327							129.389	-4414440	129.389	-6281280		-319.896	3072770
37.39	345	37.39	334							1.98231	-0.0102	1.98235	5.83916e-05							129.425	1654840	129.425	-5348170		-319.846	4454800
37.413	325	37.413	357							1.98236	-0.01528	1.98241	0.01034							129.462	4978910	129.462	-5269360		-319.797	5519500
37.436	340	37.436	341							1.98242	-0.00856	1.98247	0.01287							129.499	3913370	129.499	-5400490		-319.747	6262440
37.459	341	37.459	352							1.98248	-0.00932	1.98252	0.00479							129.536	-1143890	129.536	-4252740		-319.698	6700550
37.482	347	37.482	370							1.98253	-0.01873	1.98258	0.00121							129.572	-7516740	129.572	-1619600		-319.648	6865850
37.505	350	37.505	363							1.98259	-0.01387	1.98263	-0.01396							129.609	-11517800	129.609	645935		-319.599	6798530
37.528	320	37.528	356							1.98264	-0.00869	1.98269	-0.02416							129.646	-10837500	129.646	425920		-319.549	6540530
37.551	338	37.551	343							1.9827	-0.01657	1.98275	-0.01434							129.683	-6191540	129.683	-2114890		-319.5	6130340
37.574	338	37.574	359							1.98276	-0.0179	1.9828	-0.0202							129.719	-588206	129.719	-4252570		-319.45	5599900
37.597	318	37.597	355							1.98281	-0.00862	1.98286	-0.01954							129.756	3233530	129.756	-3422040		-319.401	4973620
37.62	323	37.62	325							1.98287	0.000220816	1.98291	-0.01423							129.793	4734630	129.793	-190691		-319.351	4269700
37.643	312	37.643	345							1.98292	0.00395	1.98297	-0.02962							129.83	5053170	129.83	1915670		-319.302	3503130
37.666	338	37.666	344							1.98298	-0.00562	1.98303	-0.03853							129.866	4898030	129.866	-62553.3		-319.252	2689820
37.689	343	37.689	348							1.98304	-0.02322	1.98308	-0.03136							129.903	3488490	129.903	-5192780		-319.203	1850810
37.712	338	37.712	352							1.98309	-0.03555	1.98314	-0.01944							129.94	-113175	129.94	-9169320		-319.153	1015800
37.735	285	37.735	353							1.98315	-0.0321	1.9832	-0.01013							129.977	-4898380	129.977	-8403370		-319.104	225108
37.758	310	37.758	394							1.9832	-0.01766	1.98325	-0.01504							130.014	-7858020	130.014	-3578250		-319.054	-470479
37.781	349	37.781	367							1.98326	-0.01414	1.98331	-0.01906							130.05	-6624830	130.05	996670		-319.005	-1012210
37.804	314	37.804	342							1.98332	-0.01643	1.98336	-0.01102							130.087	-2207880	130.087	1567270		-318.955	-1338130
37.827	320	37.827	335							1.98337	-0.0259	1.98342	-0.00981							130.124	1360740	130.124	-1631460		-318.906	-1389560
37.85	311	37.85	346							1.98343	-0.03197	1.98348	-0.00588							130.161	602673	130.161	-5043790		-318.856	-1118600
37.873	340	37.873	328							1.98348	-0.02364	1.98353	0.00262							130.197	-3992830	130.197	-5557770		-318.807	-495495
37.896	328	37.896	366							1.98354	-0.02043	1.98359	-0.00273							130.234	-8222960	130.234	-3315580		-318.757	484993
37.919	348	37.919	308							1.9836	-0.01802	1.98364	-0.02425							130.271	-8002720	130.271	-916708		-318.708	1799380
37.942	355	37.942	341							1.98365	-0.01042	1.9837	-0.03743							130.308	-3085250	130.308	-384932		-318.658	3394040
37.965	295	37.965	312							1.98371	-0.01553	1.98376	-0.0308							130.344	2863760	130.344	-1396810		-318.609	5187160
37.988	312	37.988	347							1.98376	-0.03157	1.98381	-0.01726							130.381	5695700	130.381	-2389080		-318.559	7073900
38.011	299	38.011	339							1.98382	-0.03122	1.98387	-0.00133							130.418	4248880	130.418	-2744070		-318.51	8934540
38.034	356	38.034	317							1.98388	-0.01109	1.98392	-0.00164							130.455	726346	130.455	-3280970		-318.46	10644700
38.057	318	38.057	361							1.98393	0.00233	1.98398	-0.01851							130.491	-1847230	130.491	-4647250		-318.411	12086900
38.08	339	38.08	336							1.98399	-0.00842	1.98404	-0.03568							130.528	-2265600	130.528	-5878300		-318.361	13160900
38.103	349	38.103	330							1.98405	-0.0159	1.98409	-0.04654							130.565	-1558000	130.565	-5151390		-318.312	13794300
38.126	329	38.126	333							1.9841	-0.01473	1.98415	-0.03863							130.602	-1453300	130.602	-1981060		-318.262	13948700
38.149	340	38.149	342							1.98416	-0.02838	1.9842	-0.02017							130.638	-2829350	130.638	1794950		-318.213	13623400
38.172	338	38.172	332							1.98421	-0.03584	1.98426	-0.00765							130.675	-5388680	130.675	3584610		-318.163	12855100
38.195	310	38.195	345							1.98427	-0.02494	1.98432	0.00162							130.712	-8142640	130.712	2531310		-318.114	11713600
38.218	310	38.218	327							1.98433	-0.01816	1.98437	0.000305686							130.749	-9796090	130.749	175048		-318.064	10293900
38.241	313	38.241	326							1.98438	-0.0155	1.98443	-0.01785							130.785	-9017520	130.785	-1383460		-318.014	8706260
38.264	311	38.264	336							1.98444	-0.00513	1.98449	-0.02414							130.822	-5189110	130.822	-1650000		-317.965	7064560
38.287	321	38.287	331							1.98449	-0.01042	1.98454	-0.01859							130.859	547403	130.859	-1797120		-317.915	5475060
38.31	311	38.31	343							1.98455	-0.03915	1.9846	-0.02138							130.896	5239320	130.896	-2746400		-317.866	4026340
38.333	312	38.333	323							1.98461	-0.04411	1.98465	-0.02878							130.932	5930120	130.932	-3742330		-317.816	2781880
38.356	326	38.356	316							1.98466	-0.02168	1.98471	-0.03444							130.969	2182990	130.969	-3234540		-317.767	1776040
38.379	294	38.379	320							1.98472	-0.00699	1.98477	-0.0227							131.006	-3167900	131.006	-1035400		-317.717	1013830
38.402	329	38.402	314							1.98478	-0.00503	1.98482	-0.00782							131.043	-6241630	131.043	921976		-317.668	474362
38.425	327	38.425	332							1.98483	-0.0136	1.98488	-0.01552							131.079	-5513430	131.079	352126		-317.618	117475
38.448	323	38.448	331							1.98489	-0.02628	1.98493	-0.035							131.116	-3074230	131.116	-2919290		-317.569	-107481
38.471	313	38.471	373							1.98494	-0.03854	1.98499	-0.0464							131.153	-2335530	131.153	-6542360		-317.519	-251891
38.494	314	38.494	362							1.985	-0.03141	1.98505	-0.03394							131.19	-4394810	131.19	-7808650		-317.47	-358511
38.517	322	38.517	333							1.98506	-0.00771	1.9851	-0.01159							131.226	-6799610	131.226	-6109860		-317.42	-453803
38.54	346	38.54	337							1.98511	-0.00263	1.98516	-0.01207							131.263	-6079130	131.263	-3173460		-317.371	-543012
38.563	345	38.563	329							1.98517	-0.01191	1.98522	-0.02074							131.3	-1499090	131.3	-1079450		-317.321	-608680
38.586	348	38.586	333							1.98522	-0.01621	1.98527	-0.01406							131.337	3846600	131.337	-384321		-317.272	-612836
38.609	333	38.609	319							1.98528	-0.0169	1.98533	-0.0012							131.373	5792350	131.373	-239775		-317.222	-502614
38.632	341	38.632	323							1.98534	-0.02097	1.98538	0.00134							131.41	2948250	131.41	71102		-317.173	-218526
38.655	332	38.655	344							1.98539	-0.01843	1.98544	-0.01348							131.447	-2188990	131.447	248753		-317.123	295667
38.678	312	38.678	358							1.98545	-0.01354	1.9855	-0.03145							131.484	-5822950	131.484	-304127		-317.074	1082850
38.701	349	38.701	340							1.98551	-0.02179	1.98555	-0.03322							131.521	-6368930	131.521	-1355090		-317.024	2163630
38.724	309	38.724	332							1.98556	-0.0386	1.98561	-0.02242							131.557	-5381910	131.557	-1956660		-316.975	3529870
38.747	303	38.747	348							1.98562	-0.04981	1.98567	-0.01928							131.594	-5263330	131.594	-1717070		-316.925	5141620
38.77	333	38.77	360							1.98567	-0.0436	1.98572	-0.02476							131.631	-6432480	131.631	-1494060		-316.876	6928170
38.793	340	38.793	343							1.98573	-0.02775	1.98578	-0.02427							131.668	-6979030	131.668	-2401640		-316.826	8793090
38.816	354	38.816	342							1.98579	-0.01777	1.98583	-0.01175							131.704	-5001930	131.704	-4214920		-316.777	10622900
38.839	330	38.839	365							1.98584	-0.02491	1.98589	-0.00467							131.741	-994334	131.741	-5248300		-316.727	12298600
38.862	314	38.862	348							1.9859	-0.03044	1.98595	-0.00914							131.778	2301520	131.778	-4151010		-316.678	13708000
38.885	356	38.885	332							1.98596	-0.02608	1.986	-0.02099							131.815	2412290	131.815	-1644060		-316.628	14758700
38.908	331	38.908	358							1.98601	-0.02438	1.98606	-0.03746							131.851	-568700	131.851	-10029.4		-316.579	15388500
38.931	306	38.931	373							1.98607	-0.01529	1.98612	-0.04024							131.888	-4170930	131.888	-639966		-316.529	15573400
38.954	294	38.954	357							1.98612	3.98687e-05	1.98617	-0.03073							131.925	-5904810	131.925	-2336410		-316.48	15330900
38.977	343	38.977	350							1.98618	-0.00199	1.98623	-0.02166							131.962	-5364820	131.962	-2453450		-316.43	14719100
39	342	39	329							1.98624	-0.01758	1.98628	-0.00866							131.998	-4087130	131.998	183844		-316.381	13830500
39.023	332	39.023	358							1.98629	-0.02488	1.98634	0.00432							132.035	-3530590	132.035	3774390		-316.331	12782100
39.046	321	39.046	342							1.98635	-0.03362	1.9864	0.00174							132.072	-3378670	132.072	5231170		-316.282	11702500
39.069	338	39.069	352							1.98641	-0.04835	1.98645	-0.01047							132.109	-1906850	132.109	3341310		-316.232	10717200
39.092	330	39.092	351							1.98646	-0.04666	1.98651	-0.02064							132.145	1985320	132.145	-4272.01		-316.183	9934320
39.115	324	39.115	374							1.98652	-0.02968	1.98657	-0.02053							132.182	7146850	132.182	-1825880		-316.133	9431480
39.138	306	39.138	332							1.98657	-0.01432	1.98662	-0.02176							132.219	10642100	132.219	-1086220		-316.084	9247040
39.161	335	39.161	358							1.98663	-0.00958	1.98668	-0.02085							132.256	10020100	132.256	531482		-316.034	9375030
39.184	329	39.184	324							1.98669	-0.02016	1.98673	-0.0108							132.292	5412030	132.292	785662		-315.985	9765500
39.207	359	39.207	348							1.98674	-0.02865	1.98679	-0.01018							132.329	-381631	132.329	-577804		-315.935	10330000
39.23	338	39.23	318							1.9868	-0.02957	1.98685	-0.01319							132.366	-3897880	132.366	-1724950		-315.886	10951500
39.253	323	39.253	300							1.98686	-0.02815	1.9869	-0.01951							132.403	-3443300	132.403	-1019990		-315.836	11498000
39.276	336	39.276	335							1.98691	-0.02632	1.98696	-0.02384							132.439	-49789.7	132.439	1030870		-315.787	11837700
39.299	319	39.299	365							1.98697	-0.01977	1.98702	-0.02358							132.476	3590310	132.476	2366690		-315.737	11855000
39.322	353	39.322	330							1.98702	-0.01441	1.98707	-0.03353							132.513	5119990	132.513	1695180		-315.688	11463800
39.345	348	39.345	348							1.98708	-0.02438	1.98713	-0.02966							132.55	3860730	132.55	-159003		-315.638	10618700
39.368	312	39.368	384							1.98714	-0.02597	1.98718	-0.00491							132.586	790873	132.586	-1319950		-315.589	9321190
39.391	358	39.391	357							1.98719	-0.02061	1.98724	-0.00948							132.623	-2353160	132.623	-953726		-315.539	7620580
39.414	333	39.414	371							1.98725	-0.04079	1.9873	-0.03445							132.66	-3978770	132.66	42312.5		-315.49	5609840
39.437	338	39.437	362							1.98731	-0.05811	1.98735	-0.04011							132.697	-3188320	132.697	359887		-315.44	3416550
39.46	355	39.46	341							1.98736	-0.04797	1.98741	-0.03794							132.733	-156947	132.733	-163380		-315.391	1190050
39.483	317	39.483	353							1.98742	-0.04655	1.98747	-0.03105							132.77	3652140	132.77	-618168		-315.341	-913720
39.506	345	39.506	344							1.98747	-0.05237	1.98752	-0.02356							132.807	5911830	132.807	-433977		-315.292	-2748030
39.529	328	39.529	359							1.98753	-0.04953	1.98758	-0.02897							132.844	4802600	132.844	-167988		-315.242	-4189980
39.552	379	39.552	345							1.98759	-0.04708	1.98763	-0.0376							132.88	605560	132.88	-607385		-315.193	-5152430
39.575	342	39.575	358							1.98764	-0.04483	1.98769	-0.04091							132.917	-3993560	132.917	-1409210		-315.143	-5591820
39.598	364	39.598	328							1.9877	-0.04497	1.98775	-0.03713							132.954	-5671110	132.954	-1248050		-315.094	-5511310
39.621	323	39.621	360							1.98776	-0.04426	1.9878	-0.03786							132.991	-3124660	132.991	418740		-315.044	-4958740
39.644	376	39.644	377							1.98781	-0.02984	1.98786	-0.04824							133.027	1785840	133.027	2102530		-314.995	-4020030
39.667	336	39.667	351							1.98787	-0.02046	1.98792	-0.04552							133.064	5700770	133.064	1425510		-314.945	-2808770
39.69	341	39.69	325							1.98793	-0.04379	1.98797	-0.03742							133.101	6795280	133.101	-2210610		-314.896	-1453230
39.713	339	39.713	331							1.98798	-0.06312	1.98803	-0.03851							133.138	6201310	133.138	-6379180		-314.846	-82541
39.736	358	39.736	331							1.98804	-0.05672	1.98809	-0.02827							133.175	6334830	133.175	-7552030		-314.797	1186580
39.759	351	39.759	351							1.98809	-0.05038	1.98814	-0.01932							133.211	7894900	133.211	-4519090		-314.747	2260910
39.782	335	39.782	362							1.98815	-0.04345	1.9882	-0.03182							133.248	8853360	133.248	221181		-314.698	3078570
39.805	346	39.805	311							1.98821	-0.04055	1.98825	-0.04444							133.285	6708070	133.285	2688140		-314.648	3612750
39.828	345	39.828	333							1.98826	-0.04052	1.98831	-0.04591							133.322	1623140	133.322	1087870		-314.599	3871220
39.851	347	39.851	355							1.98832	-0.03507	1.98837	-0.03854							133.358	-3159870	133.358	-2760770		-314.549	3891790
39.874	357	39.874	377							1.98838	-0.03502	1.98842	-0.03113							133.395	-4451110	133.395	-5532360		-314.5	3734590
39.897	339	39.897	372							1.98843	-0.03078	1.98848	-0.02941							133.432	-2586770	133.432	-5642260		-314.45	3472130
39.92	331	39.92	353							1.98849	-0.03383	1.98854	-0.03426							133.469	-1316770	133.469	-4259040		-314.401	3178630
39.943	337	39.943	345							1.98855	-0.04034	1.98859	-0.0396							133.505	-3844630	133.505	-3348790		-314.351	2919830
39.966	363	39.966	366							1.9886	-0.02857	1.98865	-0.03856							133.542	-9060810	133.542	-3241420		-314.302	2744650
39.989	342	39.989	378							1.98866	-0.0236	1.98871	-0.04589							133.579	-12158600	133.579	-2478940		-314.252	2679600
40.012	319	40.012	353							1.98871	-0.02787	1.98876	-0.05785							133.616	-9339810	133.616	80937.2		-314.203	2726540
40.035	341	40.035	336							1.98877	-0.02874	1.98882	-0.06137							133.652	-1865250	133.652	3502560		-314.153	2863850
40.058	350	40.058	333							1.98883	-0.03139	1.98887	-0.05897							133.689	4838890	133.689	5447350		-314.104	3050800
40.081	327	40.081	349							1.98888	-0.04293	1.98893	-0.05734							133.726	6228070	133.726	4535590		-314.054	3234330
40.104	342	40.104	342							1.98894	-0.04597	1.98899	-0.05553							133.763	2712730	133.763	1758080		-314.005	3357210
40.127	346	40.127	330							1.989	-0.03847	1.98904	-0.04898							133.799	-1300080	133.799	-563966		-313.955	3366520
40.15	308	40.15	363							1.98905	-0.03551	1.9891	-0.04961							133.836	-2119810	133.836	-1037380		-313.906	3221220
40.173	307	40.173	374							1.98911	-0.04404	1.98916	-0.06023							133.873	-135662	133.873	-228536		-313.856	2897780
40.196	344	40.196	324							1.98917	-0.06431	1.98921	-0.05667							133.91	1510460	133.91	432968		-313.807	2393340
40.219	368	40.219	340							1.98922	-0.07124	1.98927	-0.04613							133.946	1006240	133.946	390988		-313.757	1725830
40.242	318	40.242	351							1.98928	-0.06216	1.98933	-0.05235							133.983	-124137	133.983	337221		-313.708	931219
40.265	331	40.265	344							1.98933	-0.05356	1.98938	-0.06618							134.02	702009	134.02	993904		-313.658	58444
40.288	333	40.288	353							1.98939	-0.05348	1.98944	-0.07686							134.057	3410470	134.057	1944500		-313.609	-837421
40.311	376	40.311	340							1.98945	-0.05162	1.9895	-0.07458							134.093	4683130	134.093	1973450		-313.559	-1702580
40.334	327	40.334	334							1.9895	-0.05359	1.98955	-0.06882							134.13	1487470	134.13	491095		-313.51	-2491530
40.357	380	40.357	336							1.98956	-0.07678	1.98961	-0.07313							134.167	-5109650	134.167	-1685670		-313.46	-3172710
40.38	382	40.38	368							1.98962	-0.08584	1.98966	-0.0701							134.204	-10260600	134.204	-3151390		-313.41	-3731960
40.403	346	40.403	361							1.98967	-0.07414	1.98972	-0.05367							134.24	-9809200	134.24	-3395640		-313.361	-4173270
40.426	354	40.426	360							1.98973	-0.07372	1.98978	-0.05267							134.277	-4381530	134.277	-3239730		-313.311	-4516910
40.449	371	40.449	332							1.98979	-0.0664	1.98983	-0.07394							134.314	1154590	134.314	-3724950		-313.262	-4795010
40.472	338	40.472	327							1.98984	-0.05642	1.98989	-0.08291							134.351	2314700	134.351	-4739230		-313.212	-5045420
40.495	337	40.495	318							1.9899	-0.05686	1.98995	-0.07321							134.387	-964761	134.387	-4997640		-313.163	-5304660
40.518	333	40.518	376							1.98996	-0.05996	1.99	-0.06731							134.424	-4714300	134.424	-3498060		-313.113	-5601030
40.541	367	40.541	364							1.99001	-0.07106	1.99006	-0.06628							134.461	-4952690	134.461	-909899		-313.064	-5948980
40.564	337	40.564	337							1.99007	-0.0721	1.99012	-0.06697							134.498	-1156710	134.498	674196		-313.014	-6345590
40.587	391	40.587	315							1.99013	-0.07654	1.99017	-0.0666							134.534	3879230	134.534	-439462		-312.965	-6769710
40.61	363	40.61	352							1.99018	-0.08513	1.99023	-0.05935							134.571	6949040	134.571	-3821010		-312.915	-7184210
40.633	364	40.633	331							1.99024	-0.07258	1.99029	-0.05649							134.608	6924030	134.608	-6954760		-312.866	-7540900
40.656	350	40.656	348							1.99029	-0.06321	1.99034	-0.06871							134.645	4878970	134.645	-7134400		-312.816	-7787780
40.679	353	40.679	342							1.99035	-0.06538	1.9904	-0.0845							134.682	2637760	134.682	-3671040		-312.767	-7877480
40.702	323	40.702	361							1.99041	-0.07621	1.99046	-0.08454							134.718	1556800	134.718	1411400		-312.717	-7776020
40.725	337	40.725	364							1.99046	-0.08621	1.99051	-0.07753							134.755	2162260	134.755	4788440		-312.668	-7470270
40.748	353	40.748	379							1.99052	-0.07966	1.99057	-0.06947							134.792	4004550	134.792	4278350		-312.618	-6973340
40.771	354	40.771	342							1.99058	-0.0742	1.99062	-0.05896							134.829	5480970	134.829	435770		-312.569	-6326670
40.794	357	40.794	360							1.99063	-0.07698	1.99068	-0.05977							134.865	4421120	134.865	-3939820		-312.519	-5598370
40.817	358	40.817	343							1.99069	-0.07686	1.99074	-0.07471							134.902	-138938	134.902	-6002070		-312.47	-4877810
40.84	314	40.84	351							1.99075	-0.08224	1.99079	-0.09089							134.939	-6361760	134.939	-5011060		-312.42	-4266560
40.863	335	40.863	322							1.9908	-0.08896	1.99085	-0.0912							134.976	-10346100	134.976	-2681480		-312.371	-3866870
40.886	335	40.886	354							1.99086	-0.08493	1.99091	-0.09328							135.012	-9380540	135.012	-1457170		-312.321	-3768700
40.909	369	40.909	369							1.99092	-0.08525	1.99096	-0.10485							135.049	-4853530	135.049	-2273200		-312.272	-4036870
40.932	339	40.932	364							1.99097	-0.08649	1.99102	-0.10496							135.086	-1500120	135.086	-3874250		-312.222	-4700000
40.955	358	40.955	310							1.99103	-0.08284	1.99108	-0.09878							135.123	-3043600	135.123	-4313200		-312.173	-5742550
40.978	349	40.978	378							1.99109	-0.08171	1.99113	-0.09715							135.159	-8284100	135.159	-3102650		-312.123	-7101270
41.001	356	41.001	353							1.99114	-0.07038	1.99119	-0.10165							135.196	-11780400	135.196	-1773950		-312.074	-8666810
41.024	363	41.024	381							1.9912	-0.07002	1.99125	-0.1047							135.233	-8841250	135.233	-2197540		-312.024	-10290600
41.047	380	41.047	378							1.99126	-0.08888	1.9913	-0.10122							135.27	-31879.5	135.27	-4417700		-311.975	-11796700
41.07	349	41.07	347							1.99131	-0.08678	1.99136	-0.09297							135.306	9289430	135.306	-6400390		-311.925	-12997300
41.093	347	41.093	353							1.99137	-0.08039	1.99142	-0.08689							135.343	13883800	135.343	-6118770		-311.876	-13711600
41.116	337	41.116	376							1.99142	-0.09177	1.99147	-0.0987							135.38	13008600	135.38	-3793640		-311.826	-13783600
41.139	372	41.139	347							1.99148	-0.10067	1.99153	-0.11772							135.417	10078200	135.417	-1754780		-311.777	-13100800
41.162	373	41.162	323							1.99154	-0.10411	1.99159	-0.11113							135.453	8523230	135.453	-1893280		-311.727	-11607500
41.185	356	41.185	372							1.99159	-0.10276	1.99164	-0.10583							135.49	8560790	135.49	-3432090		-311.678	-9314780
41.208	361	41.208	359							1.99165	-0.09234	1.9917	-0.11918							135.527	8092350	135.527	-3624750		-311.628	-6303570
41.231	348	41.231	318							1.99171	-0.0899	1.99176	-0.11604							135.564	6095940	135.564	-876896		-311.579	-2721420
41.254	342	41.254	355							1.99176	-0.09602	1.99181	-0.10602							135.6	4225390	135.6	3045340		-311.529	1227490
41.277	370	41.277	361							1.99182	-0.09811	1.99187	-0.11232							135.637	4720940	135.637	4361290		-311.48	5297950
41.3	333	41.3	354							1.99188	-0.10557	1.99192	-0.12692							135.674	7228900	135.674	1086100		-311.43	9223860
41.323	343	41.323	369							1.99193	-0.10709	1.99198	-0.12638							135.711	8490510	135.711	-4614270		-311.381	12740800
41.346	374	41.346	365							1.99199	-0.10183	1.99204	-0.11951							135.747	5572880	135.747	-8169460		-311.331	15608900
41.369	369	41.369	371							1.99205	-0.10736	1.99209	-0.14031							135.784	-799622	135.784	-6873790		-311.282	17634100
41.392	342	41.392	378							1.9921	-0.11604	1.99215	-0.15597							135.821	-6504010	135.821	-2378370		-311.232	18685000
41.415	331	41.415	356							1.99216	-0.12581	1.99221	-0.14092							135.858	-7702740	135.858	1124400		-311.183	18704300
41.438	381	41.438	337							1.99222	-0.12649	1.99226	-0.1325							135.894	-4185120	135.894	1095630		-311.133	17713700
41.461	394	41.461	350							1.99227	-0.11912	1.99232	-0.1455							135.931	848194	135.931	-1120770		-311.084	15811100
41.484	360	41.484	340							1.99233	-0.12674	1.99238	-0.16677							135.968	3914830	135.968	-2194020		-311.034	13161300
41.507	330	41.507	332							1.99239	-0.13138	1.99243	-0.17495							136.005	3879420	136.005	-592227		-310.985	9980070
41.53	364	41.53	330							1.99244	-0.11946	1.99249	-0.17104							136.041	1799240	136.041	1851840		-310.935	6514590
41.553	366	41.553	367							1.9925	-0.12223	1.99255	-0.16236							136.078	-990082	136.078	2137380		-310.886	3020950
41.576	368	41.576	330							1.99256	-0.13975	1.9926	-0.15024							136.115	-3967780	136.115	-506068		-310.836	-258469
41.599	356	41.599	348							1.99261	-0.14378	1.99266	-0.13978							136.152	-6769360	136.152	-3750760		-310.787	-3115490
41.622	356	41.622	330							1.99267	-0.13987	1.99272	-0.14009							136.188	-8286270	136.188	-4671250		-310.737	-5392770
41.645	357	41.645	341							1.99273	-0.13357	1.99277	-0.15321							136.225	-7188240	136.225	-2794310		-310.688	-6994830
41.668	369	41.668	355							1.99278	-0.12817	1.99283	-0.16554							136.262	-3415630	136.262	-436664		-310.638	-7892720
41.691	389	41.691	370							1.99284	-0.1363	1.99289	-0.17655							136.299	1324760	136.299	-139738		-310.589	-8121880
41.714	369	41.714	360							1.9929	-0.14408	1.99294	-0.18893							136.336	4928660	136.336	-2079070		-310.539	-7773780
41.737	365	41.737	318							1.99295	-0.14862	1.993	-0.18812							136.372	6666980	136.372	-4103790		-310.49	-6982380
41.76	332	41.76	372							1.99301	-0.15142	1.99306	-0.1818							136.409	7335020	136.409	-4056230		-310.44	-5906890
41.783	411	41.783	386							1.99307	-0.14944	1.99311	-0.18746							136.446	7741850	136.446	-1714390		-310.391	-4712910
41.806	371	41.806	383							1.99312	-0.15592	1.99317	-0.19719							136.483	7577550	136.483	1496780		-310.341	-3553920
41.829	352	41.829	405							1.99318	-0.15586	1.99323	-0.20222							136.519	6178290	136.519	4204460		-310.292	-2555030
41.852	348	41.852	357							1.99324	-0.15226	1.99328	-0.19912							136.556	4149030	136.556	6026380		-310.242	-1800740
41.875	348	41.875	351							1.99329	-0.16182	1.99334	-0.20377							136.593	3444330	136.593	6925080		-310.193	-1327810
41.898	355	41.898	359							1.99335	-0.16769	1.9934	-0.22184							136.63	5282160	136.63	6309200		-310.143	-1123860
41.921	347	41.921	340							1.99341	-0.16339	1.99345	-0.23573							136.666	8195360	136.666	3457680		-310.094	-1131660
41.944	390	41.944	372							1.99346	-0.16353	1.99351	-0.23699							136.703	8902280	136.703	-1070830		-310.044	-1258500
41.967	353	41.967	374							1.99352	-0.16789	1.99357	-0.22603							136.74	5618420	136.74	-4990200		-309.995	-1389310
41.99	340	41.99	382							1.99358	-0.16925	1.99362	-0.22005							136.777	302823	136.777	-5903320		-309.945	-1402120
42.013	349	42.013	352							1.99363	-0.17582	1.99368	-0.236							136.813	-2981720	136.813	-3620480		-309.896	-1183950
42.036	323	42.036	367							1.99369	-0.18038	1.99374	-0.24889							136.85	-2243220	136.85	-645052		-309.846	-645372
42.059	311	42.059	366							1.99375	-0.17746	1.99379	-0.24274							136.887	175112	136.887	7854.63		-309.797	267839
42.082	345	42.082	366							1.9938	-0.17527	1.99385	-0.24845							136.924	-44523.1	136.924	-2360390		-309.747	1567270
42.105	387	42.105	346							1.99386	-0.179	1.99391	-0.2581							136.96	-4479320	136.96	-5518020		-309.698	3219330
42.128	345	42.128	336							1.99392	-0.19111	1.99396	-0.25674							136.997	-9953200	136.997	-6551100		-309.648	5147890
42.151	357	42.151	364							1.99397	-0.20423	1.99402	-0.2717							137.034	-11577100	137.034	-4676210		-309.599	7241630
42.174	339	42.174	396							1.99403	-0.2074	1.99408	-0.28578							137.071	-7746830	137.071	-1793550		-309.549	9365270
42.197	341	42.197	363							1.99409	-0.21213	1.99413	-0.27307							137.107	-1777870	137.107	-373796		-309.5	11373300
42.22	355	42.22	351							1.99414	-0.22193	1.99419	-0.26421							137.144	1586000	137.144	-996193		-309.45	13124900
42.243	371	42.243	363							1.9942	-0.20766	1.99425	-0.27882							137.181	1014200	137.181	-2025730		-309.401	14497600
42.266	352	42.266	361							1.99426	-0.18283	1.9943	-0.28671							137.218	-438880	137.218	-1519920		-309.351	15399600
42.289	357	42.289	351							1.99431	-0.18652	1.99436	-0.29169							137.254	810800	137.254	810117		-309.302	15778200
42.312	369	42.312	364							1.99437	-0.2038	1.99442	-0.31304							137.291	4537940	137.291	3543510		-309.252	15623700
42.335	334	42.335	397							1.99443	-0.21286	1.99447	-0.32194							137.328	6740130	137.328	5139210		-309.203	14969100
42.358	323	42.358	395							1.99448	-0.20948	1.99453	-0.31566							137.365	4064930	137.365	5258640		-309.153	13885400
42.381	371	42.381	366							1.99454	-0.19451	1.99459	-0.31076							137.401	-2207740	137.401	4519680		-309.104	12472700
42.404	383	42.404	368							1.9946	-0.19147	1.99464	-0.29913							137.438	-7048120	137.438	3321300		-309.054	10848600
42.427	367	42.427	343							1.99465	-0.20492	1.9947	-0.29192							137.475	-6622940	137.475	1345310		-309.005	9136070
42.45	353	42.45	364							1.99471	-0.22104	1.99476	-0.30507							137.512	-2151990	137.512	-1665030		-308.955	7450310
42.473	345	42.473	374							1.99477	-0.22315	1.99481	-0.33135							137.548	1329110	137.548	-4908710		-308.906	5887940
42.496	336	42.496	390							1.99482	-0.22035	1.99487	-0.35343							137.585	-10093.3	137.585	-6700700		-308.856	4518580
42.519	360	42.519	358							1.99488	-0.23208	1.99493	-0.35587							137.622	-5101350	137.622	-5852110		-308.806	3380150
42.542	377	42.542	386							1.99494	-0.22987	1.99498	-0.3478							137.659	-9168190	137.659	-2857380		-308.757	2478070
42.565	361	42.565	377							1.99499	-0.21894	1.99504	-0.34803							137.695	-8349010	137.695	385210		-308.707	1788460
42.588	326	42.588	375							1.99505	-0.23234	1.9951	-0.35925							137.732	-3124150	137.732	2070490		-308.658	1264680
42.611	381	42.611	374							1.99511	-0.26255	1.99515	-0.37127							137.769	2460870	137.769	1736830		-308.608	846355
42.634	339	42.634	345							1.99516	-0.28286	1.99521	-0.37542							137.806	4507560	137.806	182226		-308.559	469601
42.657	369	42.657	350							1.99522	-0.28426	1.99527	-0.37866							137.843	2203860	137.843	-1597510		-308.509	77263
42.68	334	42.68	362							1.99528	-0.28302	1.99532	-0.39195							137.879	-2298170	137.879	-3207370		-308.46	-372303
42.703	363	42.703	392							1.99533	-0.27516	1.99538	-0.41222							137.916	-6168690	137.916	-4694020		-308.41	-898888
42.726	371	42.726	402							1.99539	-0.26335	1.99544	-0.41812							137.953	-7883770	137.953	-5931860		-308.361	-1497380
42.749	367	42.749	392							1.99545	-0.26367	1.99549	-0.40647							137.99	-7529380	137.99	-6488480		-308.311	-2138300
42.772	363	42.772	374							1.9955	-0.27384	1.99555	-0.39969							138.026	-5969850	138.026	-6154920		-308.262	-2772000
42.795	370	42.795	422							1.99556	-0.28489	1.99561	-0.40549							138.063	-4066600	138.063	-5389650		-308.212	-3335730
42.818	351	42.818	370							1.99562	-0.29346	1.99567	-0.41366							138.1	-2382840	138.1	-4969030		-308.163	-3762860
42.841	355	42.841	359							1.99567	-0.30323	1.99572	-0.41985							138.137	-1088740	138.137	-5122670		-308.113	-3993050
42.864	376	42.864	402							1.99573	-0.30967	1.99578	-0.43772							138.173	68069.5	138.173	-5172000		-308.064	-3981840
42.887	340	42.887	370							1.99579	-0.30521	1.99584	-0.44664							138.21	1477130	138.21	-4237070		-308.014	-3708680
42.91	346	42.91	366							1.99584	-0.29828	1.99589	-0.4418							138.247	3084100	138.247	-2358870		-307.965	-3181980
42.933	375	42.933	349							1.9959	-0.29606	1.99595	-0.46033							138.284	4157110	138.284	-775002		-307.915	-2440740
42.956	350	42.956	409							1.99596	-0.30689	1.99601	-0.48461							138.32	3931130	138.32	-868546		-307.866	-1552080
42.979	390	42.979	424							1.99602	-0.33994	1.99606	-0.49339							138.357	2604890	138.357	-2745280		-307.816	-605125
43.002	408	43.002	384							1.99607	-0.34756	1.99612	-0.49104							138.394	1430660	138.394	-4937130		-307.767	298349
43.025	389	43.025	353							1.99613	-0.32356	1.99618	-0.48322							138.431	1438310	138.431	-5689640		-307.717	1055440
43.048	402	43.048	357							1.99619	-0.31633	1.99623	-0.49125							138.467	2041720	138.467	-4647480		-307.668	1574400
43.071	381	43.071	365							1.99624	-0.32854	1.99629	-0.50823							138.504	1321680	138.504	-3220840		-307.618	1786410
43.094	364	43.094	375							1.9963	-0.34792	1.99635	-0.51869							138.541	-1874170	138.541	-3156610		-307.569	1655140
43.117	353	43.117	380							1.99636	-0.35486	1.9964	-0.53588							138.578	-6139770	138.578	-4682690		-307.519	1183130
43.14	370	43.14	384							1.99641	-0.34582	1.99646	-0.55047							138.614	-8313670	138.614	-6142610		-307.47	413901
43.163	407	43.163	360							1.99647	-0.34925	1.99652	-0.54979							138.651	-6568040	138.651	-5615710		-307.42	-570557
43.186	404	43.186	367							1.99653	-0.36467	1.99657	-0.55949							138.688	-2714330	138.688	-2967030		-307.371	-1656870
43.209	358	43.209	434							1.99658	-0.36831	1.99663	-0.58029							138.725	-963966	138.725	-195915		-307.321	-2711230
43.232	347	43.232	392							1.99664	-0.37494	1.99669	-0.59247							138.761	-3898730	138.761	431560		-307.272	-3593280
43.255	388	43.255	392							1.9967	-0.3936	1.99674	-0.59784							138.798	-9590340	138.798	-1303340		-307.222	-4171300
43.278	399	43.278	378							1.99675	-0.39828	1.9968	-0.59576							138.835	-13053600	138.835	-3192970		-307.173	-4337230
43.301	369	43.301	362							1.99681	-0.38843	1.99686	-0.59579							138.872	-10923700	138.872	-2713140		-307.123	-4019660
43.324	366	43.324	389							1.99687	-0.39432	1.99692	-0.6082							138.908	-4763960	138.908	364531		-307.074	-3193500
43.347	356	43.347	378							1.99692	-0.41025	1.99697	-0.61981							138.945	446954	138.945	3502570		-307.024	-1885010
43.37	385	43.37	414							1.99698	-0.41608	1.99703	-0.62608							138.982	1254970	138.982	3685470		-306.975	-171515
43.393	390	43.393	396							1.99704	-0.43069	1.99709	-0.63039							139.019	-897910	139.019	306533		-306.925	1824190
43.416	411	43.416	364							1.99709	-0.44283	1.99714	-0.64256							139.055	-1373770	139.055	-4197040		-306.876	3944450
43.439	385	43.439	381							1.99715	-0.43341	1.9972	-0.66593							139.092	2566740	139.092	-6621010		-306.826	6011230
43.462	376	43.462	400							1.99721	-0.432	1.99726	-0.69022							139.129	8502760	139.129	-5929440		-306.777	7843100
43.485	386	43.485	388							1.99727	-0.43827	1.99731	-0.71564							139.166	10859200	139.166	-3944610		-306.727	9272940
43.508	369	43.508	335							1.99732	-0.43707	1.99737	-0.7341							139.202	6284600	139.202	-3202940		-306.678	10164500
43.531	417	43.531	385							1.99738	-0.45108	1.99743	-0.72884							139.239	-2900720	139.239	-4290580		-306.628	10426100
43.554	386	43.554	335							1.99744	-0.46981	1.99748	-0.72215							139.276	-10536300	139.276	-5435070		-306.579	10020000
43.577	378	43.577	371							1.99749	-0.47744	1.99754	-0.73736							139.313	-11858800	139.313	-4678460		-306.529	8966530
43.6	386	43.6	377							1.99755	-0.49091	1.9976	-0.75152							139.349	-7122720	139.349	-2204040		-306.48	7342250
43.623	385	43.623	380							1.99761	-0.49636	1.99765	-0.77009							139.386	-514500	139.386	-269673		-306.43	5272560
43.646	367	43.646	386							1.99766	-0.4991	1.99771	-0.79472							139.423	3980210	139.423	-824902		-306.381	2919490
43.669	426	43.669	404							1.99772	-0.51221	1.99777	-0.80491							139.46	5478860	139.46	-3406910		-306.331	465912
43.692	404	43.692	378							1.99778	-0.5138	1.99783	-0.81644							139.497	5493660	139.497	-5594450		-306.282	-1902260
43.715	406	43.715	384							1.99783	-0.51664	1.99788	-0.83753							139.533	5230270	139.533	-5510890		-306.232	-4013860
43.738	407	43.738	404							1.99789	-0.53386	1.99794	-0.84877							139.57	4254580	139.57	-3663000		-306.183	-5728580
43.761	370	43.761	440							1.99795	-0.54454	1.998	-0.85129							139.607	1805180	139.607	-2179390		-306.133	-6949530
43.784	405	43.784	412							1.99801	-0.54266	1.99805	-0.86941							139.644	-1238950	139.644	-2383900		-306.084	-7631320
43.807	415	43.807	394							1.99806	-0.5428	1.99811	-0.89036							139.68	-2453910	139.68	-3421180		-306.034	-7782500
43.83	416	43.83	375							1.99812	-0.56002	1.99817	-0.90165							139.717	-249094	139.717	-3400570		-305.985	-7462600
43.853	393	43.853	340							1.99818	-0.57859	1.99822	-0.92375							139.754	4041700	139.754	-1677630		-305.935	-6773870
43.876	395	43.876	357							1.99823	-0.58094	1.99828	-0.94696							139.791	6828610	139.791	353855		-305.886	-5848970
43.899	387	43.899	391							1.99829	-0.59555	1.99834	-0.95477							139.827	5278620	139.827	857239		-305.836	-4835840
43.922	424	43.922	434							1.99835	-0.6241	1.99839	-0.96031							139.864	-242636	139.864	-297856		-305.787	-3881470
43.945	438	43.945	395							1.9984	-0.64432	1.99845	-0.97567							139.901	-6632380	139.901	-1310920		-305.737	-3116410
43.968	419	43.968	358							1.99846	-0.65799	1.99851	-1.00109							139.938	-10776400	139.938	-457757		-305.688	-2641510
43.991	433	43.991	398							1.99852	-0.66174	1.99857	-1.0167							139.974	-11763900	139.974	1901920		-305.638	-2518380
44.014	395	44.014	386							1.99857	-0.65812	1.99862	-1.01856							140.011	-10684700	140.011	3590190		-305.589	-2764370
44.037	405	44.037	401							1.99863	-0.65589	1.99868	-1.03974							140.048	-8811060	140.048	2908590		-305.539	-3352540
44.06	419	44.06	381							1.99869	-0.66319	1.99874	-1.0686							140.085	-6462490	140.085	461214		-305.49	-4216400
44.083	448	44.083	394							1.99875	-0.68188	1.99879	-1.08077							140.121	-3640730	140.121	-1494240		-305.44	-5258770
44.106	425	44.106	397							1.9988	-0.69602	1.99885	-1.09168							140.158	-1209730	140.158	-1453080		-305.391	-6363630
44.129	422	44.129	375							1.99886	-0.69702	1.99891	-1.11644							140.195	-747763	140.195	-205221		-305.341	-7409530
44.152	384	44.152	399							1.99892	-0.70335	1.99896	-1.14429							140.232	-2930110	140.232	132427		-305.292	-8283120
44.175	408	44.175	410							1.99897	-0.72378	1.99902	-1.15951							140.268	-6314660	140.268	-1508250		-305.242	-8891160
44.198	402	44.198	394							1.99903	-0.74199	1.99908	-1.17452							140.305	-8239680	140.305	-3952620		-305.193	-9169940
44.221	402	44.221	423							1.99909	-0.7576	1.99913	-1.18849							140.342	-7248270	140.342	-5022570		-305.143	-9091000
44.244	432	44.244	398							1.99914	-0.77421	1.99919	-1.20955							140.379	-4585660	140.379	-3833340		-305.094	-8662870
44.267	440	44.267	396							1.9992	-0.78136	1.99925	-1.23179							140.415	-3068330	140.415	-1713150		-305.044	-7928650
44.29	432	44.29	385							1.99926	-0.79486	1.99931	-1.23918							140.452	-4316500	140.452	-857474		-304.995	-6960030
44.313	406	44.313	406							1.99932	-0.80864	1.99936	-1.26659							140.489	-7103810	140.489	-2197590		-304.945	-5848580
44.336	410	44.336	384							1.99937	-0.81119	1.99942	-1.29552							140.526	-8487720	140.526	-4636050		-304.896	-4695350
44.359	422	44.359	394							1.99943	-0.82142	1.99948	-1.29946							140.562	-6580610	140.562	-6244970		-304.846	-3600110
44.382	443	44.382	399							1.99949	-0.83053	1.99953	-1.31721							140.599	-2247650	140.599	-6055840		-304.797	-2651450
44.405	460	44.405	404							1.99954	-0.84276	1.99959	-1.34102							140.636	1765210	140.636	-4712220		-304.747	-1918800
44.428	460	44.428	408							1.9996	-0.85241	1.99965	-1.3576							140.673	3188760	140.673	-3614700		-304.698	-1447060
44.451	458	44.451	425							1.99966	-0.85553	1.9997	-1.37926							140.709	1770970	140.709	-3626520		-304.648	-1254470
44.474	430	44.474	433							1.99971	-0.87385	1.99976	-1.3975							140.746	-1104040	140.746	-4529610		-304.599	-1333420
44.497	401	44.497	401							1.99977	-0.90209	1.99982	-1.41452							140.783	-3799310	140.783	-5444150		-304.549	-1654230
44.52	421	44.52	385							1.99983	-0.91346	1.99988	-1.43675							140.82	-5272670	140.82	-5594600		-304.5	-2170860
44.543	393	44.543	399							1.99989	-0.91578	1.99993	-1.47505							140.856	-4997290	140.856	-4823720		-304.45	-2827970
44.566	409	44.566	400							1.99994	-0.94947	1.99999	-1.51341							140.893	-2786130	140.893	-3702140		-304.401	-3568170
44.589	447	44.589	410							2	-0.98185	2.00005	-1.52871							140.93	872169	140.93	-3271880		-304.351	-4338630
44.612	426	44.612	407							2.00006	-0.98656	2.0001	-1.54127							140.967	4536260	140.967	-4412110		-304.302	-5096180
44.635	425	44.635	380							2.00011	-0.98858	2.00016	-1.56631							141.004	6518460	141.004	-7017530		-304.252	-5810470
44.658	423	44.658	376							2.00017	-1.00162	2.00022	-1.60065							141.04	6327300	141.04	-9638400		-304.203	-6464850
44.681	425	44.681	397							2.00023	-1.02706	2.00028	-1.63291							141.077	5310430	141.077	-10237400		-304.153	-7055090
44.704	459	44.704	400							2.00028	-1.04609	2.00033	-1.64687							141.114	5411610	141.114	-7816910		-304.103	-7586340
44.727	443	44.727	394							2.00034	-1.05867	2.00039	-1.65158							141.151	7010820	141.151	-3572930		-304.054	-8068880
44.75	441	44.75	405							2.0004	-1.07312	2.00045	-1.67273							141.187	8192400	141.187	-264502		-304.004	-8513430
44.773	426	44.773	385							2.00046	-1.08852	2.0005	-1.7096							141.224	6603240	141.224	-12466		-303.955	-8926730
44.796	439	44.796	385							2.00051	-1.09803	2.00056	-1.73562							141.261	2253250	141.261	-2396650		-303.905	-9308090
44.819	425	44.819	390							2.00057	-1.10243	2.00062	-1.75935							141.298	-1783300	141.298	-4705260		-303.856	-9647490
44.842	451	44.842	381							2.00063	-1.12348	2.00067	-1.78258							141.334	-1950680	141.334	-4266440		-303.806	-9925350
44.865	422	44.865	377							2.00068	-1.15403	2.00073	-1.79354							141.371	2187270	141.371	-777619		-303.757	-10114100
44.888	450	44.888	412							2.00074	-1.17238	2.00079	-1.81451							141.408	7003160	141.408	3496750		-303.707	-10181400
44.911	403	44.911	373							2.0008	-1.18931	2.00085	-1.83299							141.445	7819450	141.445	5763480		-303.658	-10093900
44.934	456	44.934	385							2.00086	-1.20941	2.0009	-1.85348							141.481	3239670	141.481	5011810		-303.608	-9822190
44.957	380	44.957	389							2.00091	-1.21677	2.00096	-1.88625							141.518	-3330780	141.518	2551930		-303.559	-9344740
44.98	401	44.98	383							2.00097	-1.23581	2.00102	-1.92296							141.555	-6514830	141.555	572946		-303.509	-8651400
45.003	408	45.003	395							2.00103	-1.2771	2.00107	-1.97437							141.592	-3551360	141.592	299682		-303.46	-7745420
45.026	461	45.026	380							2.00108	-1.29066	2.00113	-2.01523							141.628	3540000	141.628	1361550		-303.41	-6643660
45.049	426	45.049	406							2.00114	-1.30018	2.00119	-2.03461							141.665	9967370	141.665	2543680		-303.361	-5375320
45.072	425	45.072	406							2.0012	-1.3325	2.00125	-2.05347							141.702	12200000	141.702	2865210		-303.311	-3978940
45.095	419	45.095	416							2.00125	-1.35499	2.0013	-2.07365							141.739	10320700	141.739	2051610		-303.262	-2498490
45.118	399	45.118	407							2.00131	-1.37796	2.00136	-2.08893							141.775	6999480	141.775	415041		-303.212	-978823
45.141	409	45.141	402							2.00137	-1.40144	2.00142	-2.1042							141.812	4640660	141.812	-1345090		-303.163	538621
45.164	403	45.164	421							2.00143	-1.4108	2.00147	-2.12068							141.849	3559040	141.849	-2273720		-303.113	2019410
45.187	417	45.187	407							2.00148	-1.42615	2.00153	-2.13092							141.886	2517970	141.886	-1528130		-303.064	3438360
45.21	453	45.21	379							2.00154	-1.4488	2.00159	-2.14325							141.922	558486	141.922	958305		-303.014	4780280
45.233	429	45.233	399							2.0016	-1.4517	2.00165	-2.16425							141.959	-1858000	141.959	4093400		-302.965	6038880
45.256	403	45.256	397							2.00165	-1.46415	2.0017	-2.18137							141.996	-3298840	141.996	6149290		-302.915	7214340
45.279	444	45.279	442							2.00171	-1.5026	2.00176	-2.19257							142.033	-2708980	142.033	5977620		-302.866	8309690
45.302	397	45.302	417							2.00177	-1.52131	2.00182	-2.2016							142.069	-372106	142.069	3870290		-302.816	9326740
45.325	403	45.325	411							2.00183	-1.52107	2.00187	-2.2035							142.106	2215570	142.106	1241380		-302.767	10262200
45.348	476	45.348	454							2.00188	-1.51991	2.00193	-2.20647							142.143	3351020	142.143	-551496		-302.717	11104600
45.371	408	45.371	376							2.00194	-1.52463	2.00199	-2.20693							142.18	2294640	142.18	-1105840		-302.668	11833000
45.394	429	45.394	388							2.002	-1.5392	2.00204	-2.19816							142.216	-144570	142.216	-857063		-302.618	12416900
45.417	446	45.417	390							2.00205	-1.54562	2.0021	-2.1771							142.253	-2068710	142.253	-329840		-302.569	12818600
45.44	424	45.44	406							2.00211	-1.53372	2.00216	-2.14653							142.29	-1842420	142.29	322394		-302.519	12997200
45.463	424	45.463	419							2.00217	-1.51935	2.00222	-2.12993							142.327	580821	142.327	1144430		-302.47	12914000
45.486	416	45.486	392							2.00223	-1.52581	2.00227	-2.11595							142.363	3530250	142.363	2068220		-302.42	12538200
45.509	433	45.509	362							2.00228	-1.52824	2.00233	-2.07788							142.4	5018500	142.4	2981870		-302.371	11852500
45.532	439	45.532	407							2.00234	-1.49937	2.00239	-2.02573							142.437	4526410	142.437	3968370		-302.321	10858500
45.555	397	45.555	377							2.0024	-1.47186	2.00245	-1.96906							142.474	3396630	142.474	5133120		-302.272	9578570
45.578	401	45.578	383							2.00245	-1.46587	2.0025	-1.91212							142.51	3263910	142.51	6057210		-302.222	8057300
45.601	408	45.601	398							2.00251	-1.45483	2.00256	-1.86552							142.547	4057110	142.547	5720630		-302.173	6358770
45.624	389	45.624	417							2.00257	-1.41887	2.00262	-1.79918							142.584	3859170	142.584	3461240		-302.123	4562080
45.647	400	45.647	381							2.00263	-1.38039	2.00267	-1.70441							142.621	1148050	142.621	194780		-302.074	2754370
45.67	417	45.67	400							2.00268	-1.34796	2.00273	-1.62604							142.658	-2771850	142.658	-1679040		-302.024	1022540
45.693	419	45.693	358							2.00274	-1.30035	2.00279	-1.55638							142.694	-4028740	142.694	-192804		-301.975	-555540
45.716	429	45.716	393							2.0028	-1.24766	2.00285	-1.45936							142.731	466559	142.731	4053480		-301.925	-1919250
45.739	404	45.739	368							2.00285	-1.19676	2.0029	-1.34655							142.768	9546660	142.768	7896090		-301.876	-3031640
45.762	407	45.762	388							2.00291	-1.14427	2.00296	-1.22392							142.805	17808800	142.805	8238190		-301.826	-3883340
45.785	397	45.785	310							2.00297	-1.0927	2.00302	-1.0916							142.841	19639900	142.841	4968300		-301.777	-4493140
45.808	406	45.808	377							2.00303	-1.03291	2.00307	-0.97166							142.878	13799400	142.878	1153490		-301.727	-4905240
45.831	404	45.831	387							2.00308	-0.95858	2.00313	-0.85927							142.915	4364270	142.915	64615.7		-301.678	-5183050
45.854	379	45.854	337							2.00314	-0.87847	2.00319	-0.73713							142.952	-2789170	142.952	1936000		-301.628	-5400480
45.877	367	45.877	396							2.0032	-0.79067	2.00325	-0.6148							142.988	-4608440	142.988	3853880		-301.579	-5631420
45.9	372	45.9	374							2.00326	-0.68985	2.0033	-0.49296							143.025	-2411150	143.025	3017190		-301.529	-5938920
45.923	415	45.923	367							2.00331	-0.59677	2.00336	-0.35934							143.062	581743	143.062	-2058		-301.48	-6365220
45.946	397	45.946	345							2.00337	-0.50624	2.00342	-0.21652							143.099	2756910	143.099	-1545840		-301.43	-6924060
45.969	398	45.969	381							2.00343	-0.42096	2.00347	-0.06366							143.135	5051790	143.135	1385560		-301.381	-7596390
45.992	426	45.992	398							2.00348	-0.33944	2.00353	0.08334							143.172	8734780	143.172	7722700		-301.331	-8330050
46.015	406	46.015	365							2.00354	-0.2381	2.00359	0.21411							143.209	12785200	143.209	12850300		-301.282	-9043910
46.038	410	46.038	375							2.0036	-0.13684	2.00365	0.35289							143.246	13917500	143.246	12694900		-301.232	-9635960
46.061	388	46.061	396							2.00366	-0.02876	2.0037	0.49781							143.282	9436960	143.282	7376740		-301.183	-9994710
46.084	377	46.084	361							2.00371	0.09016	2.00376	0.64063							143.319	189253	143.319	913068		-301.133	-10012700
46.107	426	46.107	349							2.00377	0.19812	2.00382	0.78575							143.356	-9277930	143.356	-2528570		-301.084	-9600600
46.13	375	46.13	401							2.00383	0.30535	2.00388	0.9239							143.393	-13656600	143.393	-2007350		-301.034	-8699820
[truncated: 14,386 more rows]

## Sheet: Fig. 2
Fig. 2d					Fig. 2e					Fig. 2f			Fig. 2h									Fig. 2i
N		B			N		B			site	Eshift (eV)		DC bias (V)	Phase (°）	DC bias (V)	Phase (°）	DC bias (V)	Amplitude (mV)	DC bias (V)	Amplitude (mV)		Layer	Dipole moment (D)	Layer	Dipole moment (D)
Bulk → Sufface (nm)	Intensity of N K edge	Bulk → Sufface (nm)	Intensity of B K edge		Bulk → Sufface (nm)	Intensity of N K edge	Bulk → Sufface (nm)	Intensity of B K edge		1	10.21		-8	-99.4637	7.96875	77.3956	-8	304.149	7.96875	455.796		1	0	1	0
1	3.92	3	152.7		1	0.196	0	0.044		2	14.12		-7.96875	-95.8148	7.9375	77.4211	-7.96875	415.873	7.9375	453.73		2	0	2	6.1
8.2	11.27	5.1	125.8		6.5	0.19	6.5	0.045					-7.9375	-96.2202	7.90625	77.3803	-7.9375	409.879	7.90625	450.399		3	0	3	24.34
10.2	34.81	11.1	92.6		10	0.176	12	0.048					-7.90625	-96.306	7.875	77.2004	-7.90625	410.31	7.875	446.946
12.3	106.98	17.2	80.5		15.5	0.193	17	0.042					-7.875	-96.238	7.84375	77.2962	-7.875	409	7.84375	446.545
18.4	192.16	19.2	69.5		18.5	0.183	21	0.04					-7.84375	-96.3644	7.8125	77.2591	-7.84375	407.479	7.8125	445.445
23.5	247.82	22.3	60.6		24.5	0.178	25.9	0.04					-7.8125	-96.4239	7.78125	77.3599	-7.8125	408.389	7.78125	444.182
31.7	291.4	29.4	45.78		30.9	0.155	30.4	0.042					-7.78125	-96.424	7.75	77.2084	-7.78125	406.804	7.75	441.962
													-7.75	-96.3858	7.71875	77.3319	-7.75	406.448	7.71875	440.737
													-7.71875	-96.5088	7.6875	77.2243	-7.71875	401.181	7.6875	437.922
													-7.6875	-96.4758	7.65625	77.2419	-7.6875	397.854	7.65625	437.018
													-7.65625	-96.6394	7.625	77.2432	-7.65625	392.783	7.625	436.165
													-7.625	-96.6098	7.59375	77.2002	-7.625	388.44	7.59375	434.576
													-7.59375	-96.7699	7.5625	77.1961	-7.59375	383.752	7.5625	433.232
													-7.5625	-96.8517	7.53125	77.191	-7.5625	382.503	7.53125	430.637
													-7.53125	-96.8584	7.5	77.2107	-7.53125	380.364	7.5	429.188
													-7.5	-96.7524	7.46875	77.1879	-7.5	378.994	7.46875	428.298
													-7.46875	-96.8208	7.4375	77.1525	-7.46875	379.604	7.4375	427.187
													-7.4375	-96.9818	7.40625	76.9682	-7.4375	376.524	7.40625	426.306
													-7.40625	-96.8925	7.375	77.0018	-7.40625	371.553	7.375	424.915
													-7.375	-97.0842	7.34375	77.0494	-7.375	369.421	7.34375	422.991
													-7.34375	-97.0824	7.3125	77.0211	-7.34375	366.608	7.3125	420.936
													-7.3125	-97.1885	7.28125	77.1148	-7.3125	364.676	7.28125	418.687
													-7.28125	-97.0407	7.25	77.0168	-7.28125	363.839	7.25	417.589
													-7.25	-97.1126	7.21875	77.1003	-7.25	360.598	7.21875	414.863
													-7.21875	-97.1314	7.1875	76.9595	-7.21875	357.166	7.1875	413.373
													-7.1875	-97.1074	7.15625	76.9576	-7.1875	356	7.15625	410.745
													-7.15625	-97.158	7.125	76.9086	-7.15625	353.334	7.125	409.771
													-7.125	-97.2783	7.09375	76.9092	-7.125	350.945	7.09375	407.296
													-7.09375	-97.2589	7.0625	76.9733	-7.09375	349.393	7.0625	406.026
													-7.0625	-97.2052	7.03125	76.9672	-7.0625	345.99	7.03125	403.284
													-7.03125	-97.1151	7	76.9682	-7.03125	344.98	7	403.07
													-7	-97.3117	6.96875	76.8918	-7	342.269	6.96875	400.942
													-6.96875	-97.357	6.9375	76.8545	-6.96875	341.146	6.9375	399.234
													-6.9375	-97.5212	6.90625	76.8525	-6.9375	338.894	6.90625	398.878
													-6.90625	-97.5255	6.875	76.8944	-6.90625	336.042	6.875	396.885
													-6.875	-97.4517	6.84375	77.0467	-6.875	335.043	6.84375	394.34
													-6.84375	-97.3971	6.8125	76.8882	-6.84375	332.126	6.8125	392.164
													-6.8125	-97.2919	6.78125	76.867	-6.8125	331.911	6.78125	390.594
													-6.78125	-97.5135	6.75	76.803	-6.78125	329.76	6.75	389.545
													-6.75	-97.5399	6.71875	76.6298	-6.75	328.345	6.71875	386.522
													-6.71875	-97.4878	6.6875	76.8804	-6.71875	327.113	6.6875	385.335
													-6.6875	-97.6998	6.65625	76.8581	-6.6875	325.211	6.65625	382.711
													-6.65625	-97.5504	6.625	76.7974	-6.65625	323.665	6.625	379.703
													-6.625	-97.4966	6.59375	76.8189	-6.625	323.845	6.59375	377.877
													-6.59375	-97.4943	6.5625	76.735	-6.59375	321.572	6.5625	376.702
													-6.5625	-97.5559	6.53125	76.6866	-6.5625	320.31	6.53125	372.946
													-6.53125	-97.657	6.5	76.5998	-6.53125	315.759	6.5	372.544
													-6.5	-97.7779	6.46875	76.7818	-6.5	316.202	6.46875	370.815
													-6.46875	-97.7394	6.4375	76.7228	-6.46875	314.205	6.4375	367.24
													-6.4375	-97.6252	6.40625	76.6459	-6.4375	313.051	6.40625	363.434
													-6.40625	-97.7048	6.375	76.7934	-6.40625	311.078	6.375	362.298
													-6.375	-97.6979	6.34375	76.6698	-6.375	309.544	6.34375	360.596
													-6.34375	-97.7475	6.3125	76.6453	-6.34375	306.137	6.3125	360.032
													-6.3125	-97.7695	6.28125	76.5733	-6.3125	303.721	6.28125	359.188
													-6.28125	-97.7863	6.25	76.6608	-6.28125	302.151	6.25	355.868
													-6.25	-97.7036	6.21875	76.6334	-6.25	299.943	6.21875	355.688
													-6.21875	-97.6647	6.1875	76.7808	-6.21875	298.187	6.1875	352.886
													-6.1875	-97.8012	6.15625	76.8204	-6.1875	297.084	6.15625	351.517
													-6.15625	-97.7546	6.125	76.6081	-6.15625	295.234	6.125	349.385
													-6.125	-97.7899	6.09375	76.5293	-6.125	294.092	6.09375	348.695
													-6.09375	-97.8331	6.0625	76.4655	-6.09375	292.47	6.0625	346.666
													-6.0625	-97.7607	6.03125	76.5131	-6.0625	291.427	6.03125	343.16
													-6.03125	-97.8253	6	76.63	-6.03125	290.108	6	340.181
													-6	-97.8268	5.96875	76.7796	-6	287.652	5.96875	337.315
													-5.96875	-97.7936	5.9375	76.7606	-5.96875	285.942	5.9375	336.672
													-5.9375	-97.7844	5.90625	76.5906	-5.9375	284.543	5.90625	333.846
													-5.90625	-97.744	5.875	76.5771	-5.90625	282.551	5.875	332.615
													-5.875	-97.7004	5.84375	76.6317	-5.875	280.189	5.84375	330.407
													-5.84375	-97.7427	5.8125	76.7656	-5.84375	278.004	5.8125	328.077
													-5.8125	-97.8726	5.78125	76.611	-5.8125	277.7	5.78125	325.637
													-5.78125	-97.8702	5.75	76.7001	-5.78125	276.471	5.75	322.703
													-5.75	-97.7566	5.71875	76.6959	-5.75	275.689	5.71875	321.613
													-5.71875	-97.8842	5.6875	76.6887	-5.71875	274.449	5.6875	319.945
													-5.6875	-97.6644	5.65625	76.6094	-5.6875	273.032	5.65625	318.257
													-5.65625	-97.4991	5.625	76.524	-5.65625	269.883	5.625	315.901
													-5.625	-97.7781	5.59375	76.5821	-5.625	268.733	5.59375	312.08
													-5.59375	-97.6691	5.5625	76.5874	-5.59375	268.865	5.5625	309.736
													-5.5625	-97.7835	5.53125	76.6431	-5.5625	265.566	5.53125	308.135
													-5.53125	-97.7607	5.5	76.6069	-5.53125	265.346	5.5	307.441
													-5.5	-97.5772	5.46875	76.4577	-5.5	263.349	5.46875	304.589
													-5.46875	-97.6865	5.4375	76.5645	-5.46875	262.608	5.4375	303.64
													-5.4375	-97.4894	5.40625	76.5225	-5.4375	260.686	5.40625	301.895
													-5.40625	-97.6287	5.375	76.5274	-5.40625	259.024	5.375	298.882
													-5.375	-97.6113	5.34375	76.5425	-5.375	257.052	5.34375	297.751
													-5.34375	-97.492	5.3125	76.518	-5.34375	256.491	5.3125	294.961
													-5.3125	-97.4622	5.28125	76.5995	-5.3125	254.596	5.28125	293.149
													-5.28125	-97.5778	5.25	76.4511	-5.28125	253.762	5.25	291.861
													-5.25	-97.5098	5.21875	76.3733	-5.25	252.859	5.21875	288.502
													-5.21875	-97.6405	5.1875	76.5378	-5.21875	252.753	5.1875	286.454
													-5.1875	-97.5251	5.15625	76.5082	-5.1875	250.974	5.15625	284.689
													-5.15625	-97.6069	5.125	76.4327	-5.15625	248.528	5.125	282.716
													-5.125	-97.5941	5.09375	76.5954	-5.125	245.918	5.09375	279.72
													-5.09375	-97.3753	5.0625	76.317	-5.09375	244.772	5.0625	276.561
													-5.0625	-97.4186	5.03125	76.4414	-5.0625	243.702	5.03125	274.977
													-5.03125	-97.3824	5	76.5062	-5.03125	242.089	5	272.328
													-5	-97.4222	4.96875	76.5433	-5	239.48	4.96875	271.317
													-4.96875	-97.4522	4.9375	76.571	-4.96875	237.548	4.9375	268.18
													-4.9375	-97.4649	4.90625	76.3973	-4.9375	237.269	4.90625	266.948
													-4.90625	-97.3409	4.875	76.5185	-4.90625	233.405	4.875	265.088
													-4.875	-97.4684	4.84375	76.5866	-4.875	234.297	4.84375	262.318
													-4.84375	-97.2118	4.8125	76.5453	-4.84375	232.455	4.8125	259.821
													-4.8125	-97.371	4.78125	76.4945	-4.8125	230.851	4.78125	258.373
													-4.78125	-97.1806	4.75	76.5327	-4.78125	228.386	4.75	257.816
													-4.75	-97.2737	4.71875	76.6131	-4.75	227.633	4.71875	256.009
													-4.71875	-97.1291	4.6875	76.5733	-4.71875	227.056	4.6875	254.709
													-4.6875	-97.1922	4.65625	76.5959	-4.6875	225.676	4.65625	251.38
													-4.65625	-97.2938	4.625	76.5335	-4.65625	225.263	4.625	247.822
													-4.625	-97.3623	4.59375	76.5909	-4.625	222.474	4.59375	245.908
													-4.59375	-97.4883	4.5625	76.4909	-4.59375	220.615	4.5625	244.167
													-4.5625	-97.4738	4.53125	76.5257	-4.5625	219.622	4.53125	241.301
													-4.53125	-96.9905	4.5	76.4999	-4.53125	218.433	4.5	238.799
													-4.5	-97.4105	4.46875	76.529	-4.5	215.468	4.46875	236.726
													-4.46875	-97.173	4.4375	76.4885	-4.46875	213.957	4.4375	233.497
													-4.4375	-97.2404	4.40625	76.6455	-4.4375	212.502	4.40625	230.246
													-4.40625	-97.1951	4.375	76.7463	-4.40625	211.014	4.375	227.703
													-4.375	-97.0627	4.34375	77.0327	-4.375	210.264	4.34375	225.519
													-4.34375	-97.1288	4.3125	76.9196	-4.34375	208.917	4.3125	224.077
													-4.3125	-97.2537	4.28125	76.7224	-4.3125	208.78	4.28125	222.7
													-4.28125	-97.2849	4.25	76.794	-4.28125	205.815	4.25	221.093
													-4.25	-97.0198	4.21875	76.7816	-4.25	204.21	4.21875	217.059
													-4.21875	-96.991	4.1875	76.9239	-4.21875	203.167	4.1875	214.792
													-4.1875	-96.9902	4.15625	76.9146	-4.1875	201.171	4.15625	212.153
													-4.15625	-96.6916	4.125	76.8838	-4.15625	200.39	4.125	210.676
													-4.125	-96.6691	4.09375	76.9042	-4.125	198.357	4.09375	208.475
													-4.09375	-96.8084	4.0625	76.9081	-4.09375	196.074	4.0625	206.585
													-4.0625	-96.9353	4.03125	76.768	-4.0625	193.88	4.03125	203.97
													-4.03125	-96.8499	4	76.8296	-4.03125	192.792	4	201.563
													-4	-96.8948	3.96875	76.6983	-4	192.657	3.96875	199.359
													-3.96875	-96.6662	3.9375	76.9724	-3.96875	190.388	3.9375	196.47
													-3.9375	-96.5867	3.90625	76.8866	-3.9375	187.618	3.90625	195.184
													-3.90625	-96.6603	3.875	76.9705	-3.90625	186.702	3.875	192.55
													-3.875	-96.7062	3.84375	76.7613	-3.875	184.847	3.84375	190.5
													-3.84375	-96.6555	3.8125	76.8595	-3.84375	183.441	3.8125	188.343
													-3.8125	-96.8897	3.78125	77.2839	-3.8125	182.519	3.78125	185.178
													-3.78125	-96.63	3.75	77.2047	-3.78125	180.839	3.75	183.84
													-3.75	-96.6726	3.71875	77.3552	-3.75	179.826	3.71875	180.863
													-3.71875	-96.4838	3.6875	77.4064	-3.71875	178.481	3.6875	179.123
													-3.6875	-96.4337	3.65625	77.3821	-3.6875	177.655	3.65625	175.207
													-3.65625	-96.504	3.625	77.1332	-3.65625	176.088	3.625	173.716
													-3.625	-96.4933	3.59375	77.0844	-3.625	174.545	3.59375	171.624
													-3.59375	-96.6296	3.5625	77.3551	-3.59375	172.944	3.5625	168.561
													-3.5625	-96.3735	3.53125	77.43	-3.5625	170.58	3.53125	167.268
													-3.53125	-96.3486	3.5	77.4117	-3.53125	168.233	3.5	164.602
													-3.5	-96.1185	3.46875	77.353	-3.5	166.56	3.46875	162.93
													-3.46875	-96.0628	3.4375	77.2759	-3.46875	164.664	3.4375	160.719
													-3.4375	-96.1372	3.40625	77.4166	-3.4375	163.46	3.40625	158.913
													-3.40625	-96.1373	3.375	77.7022	-3.40625	162.012	3.375	156.007
													-3.375	-96.0529	3.34375	77.6883	-3.375	159.497	3.34375	153.324
													-3.34375	-96.0514	3.3125	77.7409	-3.34375	158.668	3.3125	151.341
													-3.3125	-95.9854	3.28125	77.8432	-3.3125	156.72	3.28125	148.941
													-3.28125	-95.9066	3.25	77.7439	-3.28125	154.459	3.25	146.473
													-3.25	-95.8246	3.21875	77.9342	-3.25	154.082	3.21875	145.393
													-3.21875	-95.7127	3.1875	77.8508	-3.21875	152.861	3.1875	144.231
													-3.1875	-96.0099	3.15625	78.0223	-3.1875	151.376	3.15625	142.496
													-3.15625	-96.0774	3.125	78.0802	-3.15625	150.029	3.125	139.431
													-3.125	-95.7864	3.09375	77.9477	-3.125	148.025	3.09375	136.874
													-3.09375	-95.7728	3.0625	77.9079	-3.09375	145.848	3.0625	134.924
													-3.0625	-95.8618	3.03125	77.7282	-3.0625	144.515	3.03125	133.403
													-3.03125	-95.5567	3	78.171	-3.03125	141.583	3	130.718
													-3	-95.362	2.96875	78.193	-3	141.492	2.96875	128.624
													-2.96875	-95.6698	2.9375	78.0846	-2.96875	139.409	2.9375	127.156
													-2.9375	-95.9416	2.90625	78.4051	-2.9375	138.876	2.90625	125.112
													-2.90625	-95.773	2.875	78.7075	-2.90625	136.357	2.875	122.438
													-2.875	-95.631	2.84375	78.7381	-2.875	135.322	2.84375	120.62
													-2.84375	-95.4057	2.8125	78.6225	-2.84375	133.784	2.8125	118.679
													-2.8125	-95.4631	2.78125	78.6379	-2.8125	132.005	2.78125	117.111
													-2.78125	-95.517	2.75	78.8124	-2.78125	129.392	2.75	114.341
													-2.75	-95.4335	2.71875	78.4633	-2.75	128.216	2.71875	112.08
													-2.71875	-95.4793	2.6875	79.0889	-2.71875	126.278	2.6875	110.306
													-2.6875	-95.5808	2.65625	78.9164	-2.6875	124.663	2.65625	107.872
													-2.65625	-95.6027	2.625	78.9547	-2.65625	124.184	2.625	106.036
													-2.625	-95.2565	2.59375	79.4244	-2.625	121.332	2.59375	103.806
													-2.59375	-95.2258	2.5625	79.3873	-2.59375	120.837	2.5625	102.242
													-2.5625	-95.2577	2.53125	79.3909	-2.5625	119.064	2.53125	99.8832
													-2.53125	-94.8305	2.5	79.2035	-2.53125	117.427	2.5	99.0009
													-2.5	-95.0495	2.46875	79.6388	-2.5	116.048	2.46875	97.9602
													-2.46875	-95.3875	2.4375	80.2086	-2.46875	115.451	2.4375	94.9696
													-2.4375	-95.0493	2.40625	80.0563	-2.4375	113.255	2.40625	93.1165
													-2.40625	-95.0499	2.375	79.5542	-2.40625	111.37	2.375	92.7536
													-2.375	-94.5875	2.34375	79.3865	-2.375	108.858	2.34375	90.8625
													-2.34375	-94.489	2.3125	79.6635	-2.34375	107.27	2.3125	89.4428
													-2.3125	-94.5258	2.28125	79.9559	-2.3125	105.619	2.28125	87.5507
													-2.28125	-94.4367	2.25	79.9723	-2.28125	104.153	2.25	85.8141
													-2.25	-94.469	2.21875	79.6589	-2.25	102.385	2.21875	83.4053
													-2.21875	-94.4364	2.1875	80.3756	-2.21875	100.945	2.1875	81.3034
													-2.1875	-94.416	2.15625	80.0337	-2.1875	99.2312	2.15625	79.8458
													-2.15625	-94.3047	2.125	79.6039	-2.15625	97.1686	2.125	77.5897
													-2.125	-94.1802	2.09375	79.7251	-2.125	95.2075	2.09375	76.2754
													-2.09375	-94.5542	2.0625	79.4753	-2.09375	94.6313	2.0625	74.6244
													-2.0625	-93.9588	2.03125	80.0157	-2.0625	93.3335	2.03125	72.8093
													-2.03125	-94.4235	2	80.0554	-2.03125	91.6899	2	71.5488
													-2	-94.0209	1.96875	80.3608	-2	90.1947	1.96875	70.2188
													-1.96875	-93.8165	1.9375	80.7416	-1.96875	89.9171	1.9375	67.707
													-1.9375	-93.5948	1.90625	81.0752	-1.9375	87.592	1.90625	64.5967
													-1.90625	-93.4093	1.875	81.3659	-1.90625	86.7743	1.875	63.5488
													-1.875	-93.7026	1.84375	80.9232	-1.875	85.4517	1.84375	60.9077
													-1.84375	-93.372	1.8125	81.2125	-1.84375	83.6071	1.8125	59.4885
													-1.8125	-93.6662	1.78125	81.8636	-1.8125	82.7878	1.78125	56.8937
													-1.78125	-93.146	1.75	82.3521	-1.78125	81.525	1.75	55.8919
													-1.75	-92.9279	1.71875	82.1991	-1.75	80.8363	1.71875	54.8059
													-1.71875	-93.0207	1.6875	81.989	-1.71875	79.2294	1.6875	53.0372
													-1.6875	-92.9593	1.65625	82.0014	-1.6875	78.2745	1.65625	51.9153
													-1.65625	-92.9088	1.625	81.9449	-1.65625	77.1951	1.625	50.3143
													-1.625	-93.226	1.59375	82.7086	-1.625	76.7561	1.59375	48.0214
													-1.59375	-92.7639	1.5625	83.3468	-1.59375	74.8439	1.5625	45.9963
													-1.5625	-93.0386	1.53125	83.1043	-1.5625	73.9434	1.53125	45.1965
													-1.53125	-92.4437	1.5	84.2253	-1.53125	72.6925	1.5	42.9468
													-1.5	-92.7082	1.46875	84.2359	-1.5	71.6114	1.46875	42.0589
													-1.46875	-92.5504	1.4375	85.0163	-1.46875	70.7494	1.4375	40.0329
													-1.4375	-92.1263	1.40625	83.9079	-1.4375	68.4786	1.40625	38.3233
													-1.40625	-91.6215	1.375	84.9327	-1.40625	67.2425	1.375	36.5041
													-1.375	-92.9934	1.34375	85.3341	-1.375	65.7076	1.34375	35.4526
													-1.34375	-92.1101	1.3125	87.2514	-1.34375	63.3127	1.3125	32.5848
													-1.3125	-92.0274	1.28125	86.3957	-1.3125	62.7994	1.28125	31.8484
													-1.28125	-92.55	1.25	87.5359	-1.28125	60.7062	1.25	29.5853
													-1.25	-91.1775	1.21875	89.2775	-1.25	60.0711	1.21875	27.5306
													-1.21875	-91.2518	1.1875	90.2037	-1.21875	58.0224	1.1875	25.7514
													-1.1875	-91.7995	1.15625	90.3855	-1.1875	57.2422	1.15625	24.2749
													-1.15625	-92.0102	1.125	94.9571	-1.15625	55.7041	1.125	22.8964
													-1.125	-91.556	1.09375	95.6184	-1.125	54.109	1.09375	20.3024
													-1.09375	-91.3896	1.0625	95.6784	-1.09375	51.7576	1.0625	18.8006
													-1.0625	-90.4803	1.03125	101.288	-1.0625	50.6771	1.03125	17.202
													-1.03125	-90.0994	1	103.343	-1.03125	48.818	1	16.1947
													-1	-92.076	0.96875	105.655	-1	48.4981	0.96875	14.1202
													-0.96875	-91.2474	0.9375	107.43	-0.96875	47.3693	0.9375	13.0974
													-0.9375	-91.4179	0.90625	115.636	-0.9375	46.8701	0.90625	11.3817
													-0.90625	-92.0738	0.875	127.043	-0.90625	44.914	0.875	10.0221
													-0.875	-91.0085	0.84375	130.683	-0.875	42.9611	0.84375	9.7431
													-0.84375	-91.4902	0.8125	135.772	-0.84375	41.5236	0.8125	8.50285
													-0.8125	-92.2249	0.78125	145.835	-0.8125	40.8062	0.78125	8.0112
													-0.78125	-91.2943	0.75	62.9808	-0.78125	39.8824	0.75	7.279
													-0.75	-90.0259	0.71875	-73.8938	-0.75	39.1424	0.71875	8.26917
													-0.71875	-90.9271	0.6875	-158.881	-0.71875	37.146	0.6875	9.30459
													-0.6875	-92.4074	0.65625	-155.157	-0.6875	35.0181	0.65625	12.2371
													-0.65625	-90.3614	0.625	-147.141	-0.65625	32.9487	0.625	12.7441
													-0.625	-89.9025	0.59375	-143.75	-0.625	30.933	0.59375	13.8576
													-0.59375	-86.854	0.5625	-142.288	-0.59375	28.7729	0.5625	14.8672
													-0.5625	-88.7813	0.53125	-135.875	-0.5625	27.2899	0.53125	16.9589
													-0.53125	-89.7212	0.5	-134.382	-0.53125	26.3199	0.5	19.5469
													-0.5	-88.9208	0.46875	-131.914	-0.5	25.112	0.46875	21.422
													-0.46875	-88.1689	0.4375	-129.097	-0.46875	23.4553	0.4375	22.5296
													-0.4375	-87.0521	0.40625	-127.435	-0.4375	21.3061	0.40625	23.615
													-0.40625	-84.5673	0.375	-124.627	-0.40625	20.3068	0.375	24.844
													-0.375	-85.7429	0.34375	-123.551	-0.375	18.4097	0.34375	27.0143
													-0.34375	-85.1341	0.3125	-122.577	-0.34375	16.7708	0.3125	29.3336
													-0.3125	-85.7603	0.28125	-121.165	-0.3125	14.7554	0.28125	30.1443
													-0.28125	-81.8693	0.25	-120.363	-0.28125	13.2977	0.25	32.2136
													-0.25	-82.6903	0.21875	-117.531	-0.25	11.1981	0.21875	33.9935
													-0.21875	-77.6805	0.1875	-116.933	-0.21875	10.1398	0.1875	35.5528
													-0.1875	-78.1861	0.15625	-115.99	-0.1875	8.52716	0.15625	36.1793
													-0.15625	-77.1038	0.125	-115.752	-0.15625	8.21198	0.125	37.1091
													-0.125	-75.9489	0.09375	-113.157	-0.125	6.58669	0.09375	37.1035
													-0.09375	-67.2624	0.0625	-111.764	-0.09375	5.1813	0.0625	38.1365
													-0.0625	-65.6613	0.03125	-110.968	-0.0625	3.70932	0.03125	39.561
													-0.03125	-36.2931	0	-110.318	-0.03125	2.66085	0	40.0144
													0	-15	-0.03125	-109.921	0	1.83751	-0.03125	41.3142
													0.03125	37.3754	-0.0625	-109.62	0.03125	2.56995	-0.0625	42.0632
													0.0625	67.7458	-0.09375	-108.119	0.0625	4.92234	-0.09375	40.7294
													0.09375	65.9586	-0.125	-107.246	0.09375	6.75737	-0.125	40.9385
													0.125	72.4279	-0.15625	-106.905	0.125	8.971	-0.15625	41.7717
													0.15625	75.2773	-0.1875	-105.583	0.15625	10.4272	-0.1875	41.9555
													0.1875	74.7349	-0.21875	-105.238	0.1875	11.2307	-0.21875	41.0055
													0.21875	78.3257	-0.25	-103.171	0.21875	14.5621	-0.25	39.026
													0.25	79.8318	-0.28125	-102.989	0.25	15.5951	-0.28125	36.9106
													0.28125	77.3097	-0.3125	-101.213	0.28125	18.3275	-0.3125	36.1865
													0.3125	78.5414	-0.34375	-101.309	0.3125	19.7583	-0.34375	34.3134
													0.34375	79.3741	-0.375	-100.976	0.34375	20.9268	-0.375	35.9024
													0.375	80.0855	-0.40625	-100.135	0.375	23.4711	-0.40625	36.2133
													0.40625	81.0238	-0.4375	-101.62	0.40625	24.907	-0.4375	37.0517
													0.4375	82.3725	-0.46875	-99.3387	0.4375	26.0716	-0.46875	35.9483
													0.46875	82.0509	-0.5	-99.1317	0.46875	28.2691	-0.5	36.9065
													0.5	82.0957	-0.53125	-97.7636	0.5	28.8859	-0.53125	37.3656
													0.53125	81.4016	-0.5625	-96.8541	0.53125	32.2188	-0.5625	38.0686
													0.5625	81.7393	-0.59375	-96.6929	0.5625	34.1576	-0.59375	38.5935
													0.59375	82.2638	-0.625	-97.021	0.59375	37.1505	-0.625	39.3823
													0.625	82.0008	-0.65625	-96.472	0.625	37.6543	-0.65625	38.5641
													0.65625	83.9685	-0.6875	-95.3017	0.65625	39.3729	-0.6875	39.2827
													0.6875	83.4025	-0.71875	-95.3615	0.6875	40.6003	-0.71875	40.8526
													0.71875	83.8414	-0.75	-95.2442	0.71875	42.7623	-0.75	41.4946
													0.75	84.2458	-0.78125	-94.3272	0.75	43.6801	-0.78125	42.8702
													0.78125	84.0653	-0.8125	-94.1343	0.78125	45.5457	-0.8125	43.5647
													0.8125	82.6789	-0.84375	-95.5713	0.8125	48.4595	-0.84375	45.9539
													0.84375	83.3932	-0.875	-95.0134	0.84375	50.3252	-0.875	46.0093
													0.875	84.1015	-0.90625	-95.1955	0.875	51.4989	-0.90625	48.3236
													0.90625	84.5253	-0.9375	-96.0258	0.90625	52.2034	-0.9375	48.9359
													0.9375	84.1345	-0.96875	-95.8018	0.9375	54.9523	-0.96875	51.1786
													0.96875	84.1915	-1	-95.7479	0.96875	55.6007	-1	53.1277
													1	84.3839	-1.03125	-94.3216	1	58.4525	-1.03125	52.9257
													1.03125	83.8709	-1.0625	-94.2401	1.03125	59.0764	-1.0625	54.483
													1.0625	83.9064	-1.09375	-94.3334	1.0625	62.4327	-1.09375	55.4376
													1.09375	84.5259	-1.125	-95.7053	1.09375	62.8006	-1.125	56.9995
													1.125	84.6663	-1.15625	-95.1864	1.125	63.9339	-1.15625	59.1177
													1.15625	84.8448	-1.1875	-95.4759	1.15625	65.1509	-1.1875	59.7836
													1.1875	84.7736	-1.21875	-94.9162	1.1875	67.9534	-1.21875	62.1622
													1.21875	85.018	-1.25	-94.4869	1.21875	70.0403	-1.25	62.8932
													1.25	84.6315	-1.28125	-94.718	1.25	70.9965	-1.28125	64.2237
													1.28125	84.7478	-1.3125	-94.8119	1.28125	73.9704	-1.3125	65.3532
													1.3125	85.0645	-1.34375	-94.413	1.3125	75.5475	-1.34375	65.839
													1.34375	85.2968	-1.375	-94.7325	1.34375	78.1227	-1.375	67.8395
													1.375	85.0366	-1.40625	-94.8188	1.375	79.5746	-1.40625	69.0528
													1.40625	85.1266	-1.4375	-95.0413	1.40625	80.9983	-1.4375	70.9109
													1.4375	85.0125	-1.46875	-94.5779	1.4375	82.5149	-1.46875	72.1436
													1.46875	84.9374	-1.5	-94.6204	1.46875	83.1405	-1.5	73.9827
													1.5	84.4174	-1.53125	-94.6161	1.5	85.9013	-1.53125	75.4277
													1.53125	84.8378	-1.5625	-95.0962	1.53125	86.5067	-1.5625	77.7918
													1.5625	85.1621	-1.59375	-95.4051	1.5625	88.2948	-1.59375	80.4612
													1.59375	85.7866	-1.625	-94.9162	1.59375	88.4655	-1.625	81.0891
													1.625	85.777	-1.65625	-95.0372	1.625	90.3966	-1.65625	83.3142
													1.65625	86.203	-1.6875	-94.8495	1.65625	92.2711	-1.6875	83.6836
													1.6875	85.7715	-1.71875	-94.4523	1.6875	94.1601	-1.71875	86.0336
													1.71875	86.2177	-1.75	-94.535	1.71875	94.0889	-1.75	87.0957
													1.75	85.6422	-1.78125	-94.8598	1.75	95.1584	-1.78125	88.4284
													1.78125	85.9583	-1.8125	-94.9742	1.78125	95.3101	-1.8125	90.4216
													1.8125	86.0757	-1.84375	-95.069	1.8125	94.8635	-1.84375	92.9854
													1.84375	85.3754	-1.875	-94.9685	1.84375	92.1331	-1.875	93.8357
													1.875	84.7013	-1.90625	-94.8025	1.875	86.7223	-1.90625	95.1865
													1.90625	83.0436	-1.9375	-94.7239	1.90625	82.111	-1.9375	97.7205
													1.9375	82.7229	-1.96875	-95.306	1.9375	79.7771	-1.96875	98.8712
													1.96875	83.1213	-2	-94.773	1.96875	77.7839	-2	100.532
													2	82.6528	-2.03125	-94.9169	2	75.2846	-2.03125	101.713
													2.03125	82.3581	-2.0625	-95.2313	2.03125	72.8214	-2.0625	105.098
													2.0625	81.5281	-2.09375	-94.7683	2.0625	70.8801	-2.09375	106.395
													2.09375	79.8579	-2.125	-94.4138	2.09375	63.7236	-2.125	106.275
													2.125	78.9669	-2.15625	-94.7887	2.125	59.1494	-2.15625	108.211
													2.15625	77.9447	-2.1875	-94.7186	2.15625	59.5243	-2.1875	109.009
													2.1875	78.789	-2.21875	-94.8778	2.1875	61.3476	-2.21875	111.561
													2.21875	78.41	-2.25	-95.326	2.21875	62.8405	-2.25	113.258
													2.25	78.0935	-2.28125	-95.213	2.25	63.354	-2.28125	114.974
													2.28125	78.3395	-2.3125	-95.1636	2.28125	64.8291	-2.3125	117.796
													2.3125	78.2996	-2.34375	-94.936	2.3125	66.8843	-2.34375	117.965
													2.34375	78.6492	-2.375	-94.9907	2.34375	68.1014	-2.375	119.462
													2.375	78.589	-2.40625	-95.1962	2.375	68.8053	-2.40625	121.113
													2.40625	78.4388	-2.4375	-95.0162	2.40625	70.383	-2.4375	122.33
													2.4375	79.1234	-2.46875	-95.6748	2.4375	71.7878	-2.46875	122.822
													2.46875	78.6726	-2.5	-95.3446	2.46875	73.3844	-2.5	125.009
													2.5	79.4331	-2.53125	-95.2321	2.5	75.0368	-2.53125	126.354
													2.53125	78.9508	-2.5625	-95.0225	2.53125	76.0613	-2.5625	126.835
													2.5625	77.8679	-2.59375	-95.106	2.5625	79.4133	-2.59375	128.619
													2.59375	77.6131	-2.625	-95.3388	2.59375	81.6109	-2.625	130.399
													2.625	76.7254	-2.65625	-95.4427	2.625	85.1102	-2.65625	132.486
													2.65625	77.684	-2.6875	-95.5521	2.65625	85.9437	-2.6875	134.906
													2.6875	79.7669	-2.71875	-95.6091	2.6875	89.7725	-2.71875	136.679
													2.71875	82.2775	-2.75	-95.5627	2.71875	94.125	-2.75	138.146
													2.75	80.5412	-2.78125	-95.585	2.75	97.9078	-2.78125	139.102
													2.78125	79.297	-2.8125	-95.6909	2.78125	98.5861	-2.8125	141.394
													2.8125	79.441	-2.84375	-95.7549	2.8125	99.3365	-2.84375	141.788
													2.84375	78.6855	-2.875	-95.4694	2.84375	100.268	-2.875	144.814
													2.875	78.9163	-2.90625	-95.3588	2.875	101.72	-2.90625	144.104
													2.90625	78.6243	-2.9375	-95.5571	2.90625	101.739	-2.9375	146.004
													2.9375	78.3745	-2.96875	-95.969	2.9375	102.799	-2.96875	148.823
													2.96875	78.4361	-3	-95.8265	2.96875	103.301	-3	150.115
													3	78.0417	-3.03125	-95.7371	3	105.795	-3.03125	151.99
													3.03125	78.1994	-3.0625	-95.4761	3.03125	106.662	-3.0625	151.305
													3.0625	78.404	-3.09375	-96.1916	3.0625	107.477	-3.09375	152.058
													3.09375	78.4893	-3.125	-96.2397	3.09375	108.562	-3.125	153.054
													3.125	78.3979	-3.15625	-96.6488	3.125	109.621	-3.15625	154.695
													3.15625	78.4015	-3.1875	-97.0874	3.15625	110.405	-3.1875	155.676
													3.1875	78.3521	-3.21875	-96.6394	3.1875	112.083	-3.21875	156.983
													3.21875	78.1482	-3.25	-96.4916	3.21875	114.122	-3.25	158.658
													3.25	77.9655	-3.28125	-96.5759	3.25	115.804	-3.28125	159.993
													3.28125	78.1624	-3.3125	-96.6756	3.28125	117.517	-3.3125	162.41
													3.3125	78.9897	-3.34375	-96.6129	3.3125	118.126	-3.34375	165.082
													3.34375	78.4391	-3.375	-96.7125	3.34375	120.055	-3.375	167.537
													3.375	78.4287	-3.40625	-96.9042	3.375	121.444	-3.40625	170.745
													3.40625	78.4379	-3.4375	-96.7675	3.40625	122.776	-3.4375	171.576
													3.4375	78.0911	-3.46875	-96.6405	3.4375	125.142	-3.46875	174.06
													3.46875	78.3006	-3.5	-96.5481	3.46875	126.87	-3.5	175.237
													3.5	78.4005	-3.53125	-96.5607	3.5	128.352	-3.53125	177.993
													3.53125	78.3769	-3.5625	-96.7946	3.53125	129.073	-3.5625	179.92
													3.5625	78.1521	-3.59375	-96.6532	3.5625	130.321	-3.59375	181.522
													3.59375	78.2859	-3.625	-96.54	3.59375	133.411	-3.625	182.894
													3.625	78.5187	-3.65625	-96.5861	3.625	135.208	-3.65625	185.875
													3.65625	78.5394	-3.6875	-96.6677	3.65625	135.359	-3.6875	186.746
													3.6875	78.6056	-3.71875	-96.308	3.6875	135.646	-3.71875	190.302
													3.71875	78.8482	-3.75	-96.8048	3.71875	138.219	-3.75	190.572
													3.75	78.6668	-3.78125	-96.6859	3.75	141.536	-3.78125	192.478
													3.78125	78.3603	-3.8125	-96.7724	3.78125	143.378	-3.8125	193.504
													3.8125	78.5995	-3.84375	-96.7977	3.8125	145.234	-3.84375	198.055
													3.84375	78.7071	-3.875	-96.8088	3.84375	148.102	-3.875	199.627
													3.875	78.5568	-3.90625	-96.5699	3.875	149.387	-3.90625	201.454
													3.90625	78.7696	-3.9375	-96.3752	3.90625	151.44	-3.9375	201.614
													3.9375	78.5115	-3.96875	-96.5069	3.9375	154.248	-3.96875	204.274
													3.96875	78.7319	-4	-96.8616	3.96875	154.617	-4	206.33
													4	78.9889	-4.03125	-96.6372	4	156.239	-4.03125	208.062
													4.03125	78.5355	-4.0625	-96.6882	4.03125	158.849	-4.0625	210.272
													4.0625	78.7465	-4.09375	-96.8277	4.0625	161.602	-4.09375	213.697
													4.09375	78.4891	-4.125	-96.7668	4.09375	162.977	-4.125	215.5
													4.125	78.5442	-4.15625	-96.6184	4.125	165.389	-4.15625	217.151
													4.15625	78.5521	-4.1875	-96.514	4.15625	167.481	-4.1875	219.559
													4.1875	78.0882	-4.21875	-96.7739	4.1875	168.494	-4.21875	222.095
													4.21875	78.4435	-4.25	-96.7973	4.21875	171.138	-4.25	222.802
													4.25	78.4992	-4.28125	-96.7531	4.25	174.431	-4.28125	223.988
													4.28125	78.4074	-4.3125	-96.6004	4.28125	175.349	-4.3125	227.597
													4.3125	78.2062	-4.34375	-96.7652	4.3125	177.188	-4.34375	228.828
													4.34375	78.4267	-4.375	-96.6081	4.34375	178.869	-4.375	231.396
													4.375	78.1919	-4.40625	-96.5154	4.375	181.611	-4.40625	233.676
													4.40625	78.3555	-4.4375	-96.5841	4.40625	183.701	-4.4375	236.941
													4.4375	78.1448	-4.46875	-96.6276	4.4375	185.933	-4.46875	238.509
													4.46875	77.8147	-4.5	-96.559	4.46875	188.231	-4.5	238.077
													4.5	78.0942	-4.53125	-96.3947	4.5	189.69	-4.53125	239.133
													4.53125	77.9713	-4.5625	-96.4629	4.53125	192.385	-4.5625	241.849
													4.5625	78.0127	-4.59375	-96.2243	4.5625	194.33	-4.59375	243.99
													4.59375	78.0313	-4.625	-96.4991	4.59375	196.352	-4.625	245.989
													4.625	77.9545	-4.65625	-96.4077	4.625	198.574	-4.65625	247.975
													4.65625	78.0008	-4.6875	-96.3893	4.65625	200.621	-4.6875	249.08
													4.6875	78.0091	-4.71875	-96.5304	4.6875	203.455	-4.71875	251.609
													4.71875	77.9785	-4.75	-96.2015	4.71875	205.448	-4.75	253.502
													4.75	77.9463	-4.78125	-96.3101	4.75	206.938	-4.78125	256.391
													4.78125	77.9414	-4.8125	-96.3037	4.78125	209.742	-4.8125	258.509
													4.8125	77.7247	-4.84375	-96.3249	4.8125	211.547	-4.84375	259.8
													4.84375	77.8983	-4.875	-96.2914	4.84375	212.681	-4.875	260.676
													4.875	77.6332	-4.90625	-96.1067	4.875	216.325	-4.90625	263.555
													4.90625	77.8695	-4.9375	-96.4399	4.90625	218.614	-4.9375	267.596
													4.9375	77.7328	-4.96875	-96.1245	4.9375	219.963	-4.96875	269.511
													4.96875	77.8778	-5	-96.2302	4.96875	222.051	-5	271.446
													5	77.8121	-5.03125	-96.156	5	224.599	-5.03125	272.87
													5.03125	77.7039	-5.0625	-96.1316	5.03125	226.821	-5.0625	275.366
													5.0625	77.5819	-5.09375	-96.2485	5.0625	228.326	-5.09375	278.341
													5.09375	77.5435	-5.125	-96.3431	5.09375	231.453	-5.125	279.267
													5.125	77.5595	-5.15625	-96.5571	5.125	233.126	-5.15625	283.271
													5.15625	77.332	-5.1875	-96.4434	5.15625	236.087	-5.1875	286.006
													5.1875	77.5345	-5.21875	-96.3447	5.1875	236.765	-5.21875	285.26
													5.21875	77.71	-5.25	-96.2952	5.21875	240.078	-5.25	285.691
													5.25	77.6267	-5.28125	-96.3646	5.25	242.552	-5.28125	287.587
													5.28125	77.5786	-5.3125	-96.314	5.28125	243.706	-5.3125	290.296
													5.3125	77.5457	-5.34375	-96.0943	5.3125	247.144	-5.34375	292.542
													5.34375	77.4477	-5.375	-96.4628	5.34375	250.512	-5.375	293.163
													5.375	77.2601	-5.40625	-96.3701	5.375	251.896	-5.40625	297.058
													5.40625	77.5696	-5.4375	-96.4132	5.40625	253.956	-5.4375	298.67
													5.4375	77.4253	-5.46875	-96.4046	5.4375	256.39	-5.46875	301.2
													5.46875	77.3598	-5.5	-96.4793	5.46875	257.992	-5.5	302.383
													5.5	77.3088	-5.53125	-96.2831	5.5	261.705	-5.53125	304.307
													5.53125	77.3038	-5.5625	-96.3299	5.53125	264.436	-5.5625	306.412
													5.5625	77.2167	-5.59375	-96.475	5.5625	265.911	-5.59375	307.858
													5.59375	77.2239	-5.625	-96.5967	5.59375	268.176	-5.625	310.015
													5.625	77.1792	-5.65625	-96.62	5.625	270.259	-5.65625	312.303
													5.65625	77.0836	-5.6875	-96.5141	5.65625	273.085	-5.6875	316.853
													5.6875	77.1964	-5.71875	-96.4614	5.6875	275.917	-5.71875	318.562
													5.71875	77.1585	-5.75	-96.4917	5.71875	279.049	-5.75	319.571
													5.75	77.1787	-5.78125	-96.4635	5.75	280.963	-5.78125	321.873
													5.78125	77.1528	-5.8125	-96.4898	5.78125	282.527	-5.8125	323.213
													5.8125	77.3328	-5.84375	-96.4862	5.8125	284.596	-5.84375	324.568
													5.84375	77.2773	-5.875	-96.5079	5.84375	287.846	-5.875	325.918
													5.875	77.2074	-5.90625	-96.5367	5.875	289.568	-5.90625	329.453
													5.90625	77.2162	-5.9375	-96.5373	5.90625	290.684	-5.9375	332.454
													5.9375	77.1452	-5.96875	-96.6675	5.9375	294.923	-5.96875	334.322
													5.96875	77.1296	-6	-96.3608	5.96875	296.724	-6	336.863
													6	77.0091	-6.03125	-96.3873	6	301.071	-6.03125	336.393
													6.03125	77.0685	-6.0625	-96.3848	6.03125	302.277	-6.0625	338.124
													6.0625	77.1371	-6.09375	-96.3467	6.0625	304.201	-6.09375	337.303
													6.09375	77.0229	-6.125	-96.4209	6.09375	306.997	-6.125	341.843
													6.125	77.0181	-6.15625	-96.3447	6.125	310.17	-6.15625	343.178
													6.15625	76.9511	-6.1875	-96.3722	6.15625	311.966	-6.1875	346.041
													6.1875	76.9857	-6.21875	-96.345	6.1875	314.223	-6.21875	346.824
													6.21875	77.0199	-6.25	-96.3188	6.21875	317.343	-6.25	348.661
													6.25	76.908	-6.28125	-96.3591	6.25	319.991	-6.28125	352.399
													6.28125	76.9291	-6.3125	-96.2152	6.28125	323.434	-6.3125	353.888
													6.3125	76.9965	-6.34375	-96.4142	6.3125	325.468	-6.34375	356.143
													6.34375	76.9696	-6.375	-96.4372	6.34375	327.448	-6.375	359.094
													6.375	76.9338	-6.40625	-96.459	6.375	329.283	-6.40625	361.241
													6.40625	76.8723	-6.4375	-96.361	6.40625	333.071	-6.4375	362.789
													6.4375	76.9522	-6.46875	-96.3138	6.4375	334.598	-6.46875	365.817
													6.46875	77.0155	-6.5	-96.4197	6.46875	338.428	-6.5	367.073
													6.5	77.0335	-6.53125	-96.4771	6.5	340.1	-6.53125	366.644
													6.53125	77.045	-6.5625	-96.5269	6.53125	342.843	-6.5625	367.145
													6.5625	77.028	-6.59375	-96.4931	6.5625	343.077	-6.59375	371.603
													6.59375	77.0165	-6.625	-96.5496	6.59375	344.133	-6.625	371.865
													6.625	76.8451	-6.65625	-96.5531	6.625	345.274	-6.65625	377.568
													6.65625	76.8175	-6.6875	-96.4637	6.65625	348.196	-6.6875	378.415
													6.6875	77.0487	-6.71875	-96.4802	6.6875	350.894	-6.71875	381.462
													6.71875	76.906	-6.75	-96.5	6.71875	354.31	-6.75	383.07
													6.75	76.8925	-6.78125	-96.6197	6.75	355.558	-6.78125	385.134
													6.78125	76.9436	-6.8125	-96.5914	6.78125	356.518	-6.8125	386.884
													6.8125	76.9566	-6.84375	-96.6261	6.8125	359.248	-6.84375	388.52
													6.84375	76.9725	-6.875	-96.5905	6.84375	361.812	-6.875	390.379
													6.875	77.1004	-6.90625	-96.5819	6.875	363.63	-6.90625	391.37
													6.90625	77.1267	-6.9375	-96.5672	6.90625	366.814	-6.9375	390.88
													6.9375	77.2111	-6.96875	-96.7436	6.9375	369.663	-6.96875	390.059
													6.96875	77.1136	-7	-96.7862	6.96875	372.589	-7	390.74
													7	77.1478	-7.03125	-96.787	7	375.755	-7.03125	391.606
													7.03125	77.1049	-7.0625	-96.7191	7.03125	378.849	-7.0625	393.558
													7.0625	77.1313	-7.09375	-96.7639	7.0625	382.414	-7.09375	394.814
													7.09375	76.9958	-7.125	-96.7358	7.09375	384.328	-7.125	397.711
													7.125	77.0781	-7.15625	-96.7486	7.125	387.902	-7.15625	398.913
													7.15625	77.0843	-7.1875	-96.7227	7.15625	390.731	-7.1875	403.399
													7.1875	77.0871	-7.21875	-96.8909	7.1875	393.448	-7.21875	405.314
													7.21875	77.0533	-7.25	-96.887	7.21875	395.265	-7.25	405.392
													7.25	77.0686	-7.28125	-96.8114	7.25	397.516	-7.28125	404.665
													7.28125	77.0893	-7.3125	-96.8083	7.28125	399.412	-7.3125	405.543
													7.3125	77.07	-7.34375	-96.9741	7.3125	403.209	-7.34375	406.52
													7.34375	77.0975	-7.375	-96.8845	7.34375	404.451	-7.375	408.2
													7.375	77.1221	-7.40625	-96.8565	7.375	407.874	-7.40625	408.423
													7.40625	77.1578	-7.4375	-96.9743	7.40625	408.7	-7.4375	408.953
													7.4375	77.1809	-7.46875	-97.0257	7.4375	410.656	-7.46875	411.216
													7.46875	77.1766	-7.5	-96.9474	7.46875	414.951	-7.5	410.266
													7.5	77.1703	-7.53125	-97.0212	7.5	417.494	-7.53125	408.382
													7.53125	77.1216	-7.5625	-96.9669	7.53125	420.518	-7.5625	409.535
													7.5625	77.2149	-7.59375	-97.0279	7.5625	422.124	-7.59375	411.38
													7.59375	77.2052	-7.625	-96.9706	7.59375	426.607	-7.625	414.104
													7.625	77.1774	-7.65625	-97.1498	7.625	428.29	-7.65625	413.555
													7.65625	77.2197	-7.6875	-97.122	7.65625	429.215	-7.6875	414.311
													7.6875	77.207	-7.71875	-97.0098	7.6875	431.414	-7.71875	415.387
													7.71875	77.167	-7.75	-96.9238	7.71875	435.2	-7.75	418.084
													7.75	77.2649	-7.78125	-97.021	7.75	437.832	-7.78125	416.939
													7.78125	77.3081	-7.8125	-97.0636	7.78125	440.326	-7.8125	418.426
													7.8125	77.1764	-7.84375	-97.0319	7.8125	441.429	-7.84375	421.555
													7.84375	77.3547	-7.875	-97.0043	7.84375	442.876	-7.875	426.568
													7.875	77.2593	-7.90625	-96.9523	7.875	444.958	-7.90625	429.686
													7.90625	77.2522	-7.9375	-96.9207	7.90625	448.725	-7.9375	432.451
													7.9375	77.311	-7.96875	-97.0249	7.9375	450.129	-7.96875	435.749
													7.96875	77.3662	-8	-97.0707	7.96875	453.026	-8	437.947

## Sheet: Fig. 3
Fig. 3a									Fig. 3b							Fig. 3c													Fig. 3d							Fig. 3e							Fig. 3f
B:C3N5-x		C3N5		None		Dark			B:C3N5-x		C3N5		None			B:C3N5-x (Original)		B:C3N5-x (Fitting)		C3N5 (Original)		C3N5 (Fitting)		None (Original)		None (Fitting)			B:C3N5-x		C3N5		None			B:C3N5-x		C3N5		None			B:C3N5-x		C3N5		None
Potential (V vs. RHE)	Current density (mA cm-2)	Potential (V vs. RHE)	Current density (mA cm-2)	Potential (V vs. RHE)	Current density (mA cm-2)	Potential (V vs. RHE)	Current density (mA cm-2)		Potential (V vs. RHE)	ABPE (%)	Potential (V vs. RHE)	ABPE (%)	Potential (V vs. RHE)	ABPE (%)		Z' (ohm)	-Z'' (ohm)	Z' (ohm)	-Z'' (ohm)	Z' (ohm)	-Z'' (ohm)	Z' (ohm)	-Z'' (ohm)	Z' (ohm)	-Z'' (ohm)	Z' (ohm)	-Z'' (ohm)		Wavelength (nm)	IPCE (%)	Wavelength (nm)	IPCE (%)	Wavelength (nm)	IPCE (%)		Potential (V vs. RHE)	1/C2×109 (F-2 cm-4)	Potential (V vs. RHE)	1/C2×109 (F-2 cm-4)	Potential (V vs. RHE)	1/C2×109 (F-2 cm-4)		Time (s)	Current density (mA cm-2)	Time (s)	Current density (mA cm-2)	Time (s)	Current density (mA cm-2)
0.2	-0.12344	0.22	-0.14564	0.22	-0.22267	0.2	-0.02443		0.2	0.22	0.22	-0.1471	-0.12715	-0.22489		32.82	4.712	37.558	3.8096	34.84	2.875	35.866	2.2686	35.04	2.935	36.199	2.3107		400	0.90729	400	0.81542	400	0.6929		0	598621000	0	1500950000	0	688133000		0.1	0.01301	0.1	0.00255	0.1	0.00536
0.201	-0.09902	0.221	-0.12896	0.221	-0.20882	0.201	-0.02415		0.201	0.221	0.221	-0.13012	-0.10189	-0.2107		33.32	4.462	37.989	4.2198	34.93	2.628	36.032	2.6218	35.18	2.698	36.351	2.6783		420	0.89769	420	0.70779	420	0.65611		0.01	667847000	0.01	1600910000	0.01	721155000		0.2	0.01234	0.2	0.00246	0.2	0.00506
0.202	-0.07892	0.222	-0.11729	0.222	-0.19424	0.202	-0.02388		0.202	0.222	0.222	-0.11823	-0.08113	-0.1958		33.77	4.243	38.481	4.6546	35.06	2.462	36.227	3.0214	35.29	2.533	36.534	3.1078		440	0.83756	440	0.68493	440	0.60541		0.02	688793000	0.02	1595380000	0.02	745314000		0.3	0.01185	0.3	0.00242	0.3	0.0049
0.203	-0.06311	0.223	-0.10853	0.223	-0.18153	0.203	-0.02357		0.203	0.223	0.223	-0.10929	-0.06482	-0.1828		34.2	4.039	39.043	5.1118	35.16	2.36	36.466	3.4881	35.4	2.44	36.76	3.6113		460	0.75266	460	0.68027	460	0.55211		0.03	704381000	0.03	1600910000	0.03	756678000		0.4	0.01145	0.4	0.00239	0.4	0.00473
0.204	-0.04578	0.224	-0.09589	0.224	-0.17311	0.204	-0.02332		0.204	0.224	0.224	-0.09646	-0.04697	-0.17415		34.59	3.867	39.68	5.5843	35.28	2.323	36.747	4.0104	35.52	2.407	37.027	4.178		480	0.42634	480	0.35758	480	0.32345		0.04	707720000	0.04	1574870000	0.04	758062000		0.5	0.01113	0.5	0.00236	0.5	0.0046
0.205	-0.02227	0.225	-0.08571	0.225	-0.16727	0.205	-0.0231		0.205	0.225	0.225	-0.08614	-0.02282	-0.1681		34.96	3.719	40.399	6.0648	35.4	2.342	37.091	4.6111	35.65	2.432	37.354	4.8326		500	0.13965	500	0.13919	500	0.11235		0.05	708389000	0.05	1555480000	0.05	748061000		0.6	0.01083	0.6	0.00233	0.6	0.00448
0.206	-0.000177778	0.226	-0.08178	0.226	-0.158	0.206	-0.02283		0.206	0.226	0.226	-0.0821	-0.000182044	-0.15863		35.3	3.609	41.202	6.5428	35.53	2.416	37.502	5.2844	35.78	2.515	37.749	5.5767		520	0.03307	520	0.03091	520	0.02485		0.06	701382000	0.06	1522940000	0.06	740861000		0.7	0.01059	0.7	0.0023	0.7	0.00439
0.207	0.01487	0.227	-0.07602	0.227	-0.14698	0.207	-0.02261		0.207	0.227	0.227	-0.07625	0.01521	-0.14742		35.62	3.542	42.101	7.0103	35.68	2.544	37.996	6.0379	35.92	2.659	38.225	6.4134		540	0.02613	540	0.02469				0.07	691434000	0.07	1489780000	0.07	733355000		0.8	0.01039	0.8	0.00229	0.8	0.0043
0.208	0.02857	0.228	-0.06522	0.228	-0.13809	0.208	-0.02232		0.208	0.228	0.228	-0.06535	0.0292	-0.13837		35.93	3.525	43.082	7.4463	35.85	2.731	38.593	6.8777	36.08	2.866	38.815	7.3716		560	0.02018	560	0.02062				0.08	680573000	0.08	1442620000	0.08	725549000		0.9	0.0102	0.9	0.00226	0.9	0.00423
0.209	0.05061	0.229	-0.05853	0.229	-0.13287	0.209	-0.02199		0.209	0.229	0.229	-0.05859	0.05167	-0.133		36.23	3.565	44.134	7.8347	36.04	2.98	39.31	7.8021	36.26	3.139	39.529	8.4345		580	0.01431	580	0.01365				0.09	672727000	0.09	1396700000	0.09	710062000		1	0.01005	1	0.00222	1	0.00413
0.21	0.06924	0.23	-0.05322	0.23	-0.12407	0.21	-0.02171		0.21	0.23	0.23	-0.05322	0.07063	-0.12407		36.54	3.664	45.286	8.1729	36.25	3.293	40.172	8.8085	36.46	3.484	40.399	9.6132		600	0.00357						0.1	662338000	0.1	1355210000	0.1	694742000		1.1	0.00989	1.1	0.0022	1.1	0.0041
0.211	0.08173	0.231	-0.04662	0.231	-0.11344	0.211	-0.02154		0.211	0.231	0.231	-0.04658	0.08329	-0.11333		36.86	3.818	46.482	8.4331	36.49	3.675	41.201	9.8867	36.7	3.908	41.449	10.893									0.11	652671000	0.11	1310710000	0.11	678280000		1.2	0.00975	1.2	0.00218	1.2	0.00407
0.212	0.09446	0.232	-0.03889	0.232	-0.10538	0.212	-0.02121		0.212	0.232	0.232	-0.03881	0.09616	-0.10517		37.19	3.909	47.744	8.612	36.76	4.015	42.434	11.03	36.96	4.302	42.736	12.289									0.12	644032000	0.12	1267840000	0.12	654599000		1.3	0.00963	1.3	0.00214	1.3	0.004
0.213	0.11344	0.233	-0.03318	0.233	-0.10047	0.213	-0.02095		0.213	0.233	0.233	-0.03308	0.11537	-0.10017		37.56	4.001	49.002	8.6956	37.08	4.381	43.877	12.195	37.27	4.733	44.238	13.72									0.13	631971000	0.13	1233180000	0.13	632286000		1.4	0.00951	1.4	0.00212	1.4	0.00395
0.214	0.13267	0.234	-0.02922	0.234	-0.09409	0.214	-0.02061		0.214	0.234	0.234	-0.02911	0.13479	-0.09371		37.98	4.242	50.326	8.6829	37.46	4.929	45.535	13.341	37.65	5.356	46.043	15.207									0.14	622215000	0.14	1197260000	0.14	615027000		1.5	0.00941	1.5	0.0021	1.5	0.00393
0.215	0.145	0.235	-0.02273	0.235	-0.08531	0.215	-0.0204		0.215	0.235	0.235	-0.02262	0.14718	-0.08488		38.46	4.603	51.596	8.5735	37.93	5.642	47.479	14.461	38.14	6.161	48.198	16.706									0.15	617522000	0.15	1155890000	0.15	602316000		1.6	0.00931	1.6	0.00207	1.6	0.00388
0.216	0.15844	0.236	-0.01479	0.236	-0.07729	0.216	-0.02002		0.216	0.236	0.236	-0.0147	0.16066	-0.07683		39.02	5.051	52.872	8.3658	38.51	6.498	49.632	15.458	38.73	7.131	50.633	18.098									0.16	611293000	0.16	1121120000	0.16	587908000		1.7	0.00922	1.7	0.00207	1.7	0.00383
0.217	0.178	0.237	-0.00957	0.237	-0.07336	0.217	-0.01983		0.217	0.237	0.237	-0.00951	0.18031	-0.07284		39.65	5.533	54.002	8.0969	39.21	7.455	52.041	16.308	39.44	8.224	53.41	19.35									0.17	606641000	0.17	1101850000	0.17	574277000		1.8	0.00912	1.8	0.00206	1.8	0.0038
0.218	0.19756	0.238	-0.00611	0.238	-0.067	0.218	-0.01958		0.218	0.238	0.238	-0.00606	0.19993	-0.06646		40.37	6.022	55.194	7.7225	40.05	8.486	54.573	16.926	40.3	9.422	56.394	20.347									0.18	603859000	0.18	1080680000	0.18	562890000		1.9	0.00903	1.9	0.00205	1.9	0.00375
0.219	0.21256	0.239	-0.00212	0.239	-0.05733	0.219	-0.01932		0.219	0.239	0.239	-0.0021	0.21489	-0.05682		41.16	6.501	56.205	7.3271	41.08	9.579	57.353	17.304	41.35	10.72	59.758	21.082									0.19	603550000	0.19	1058480000	0.19	553095000		2	0.00895	2	0.00203	2	0.00372
0.22	0.22422	0.24	0.006	0.24	-0.04913	0.22	-0.01903		0.22	0.24	0.24	0.00594	0.22646	-0.04864		42.05	6.968	57.201	6.8615	42.3	10.72	60.111	17.382	42.63	12.1	63.187	21.434									0.2	603241000	0.2	1041380000	0.2	547494000		2.1	0.00889	2.1	0.00203	2.1	0.00369
0.221	0.23944	0.241	0.01148	0.241	-0.04491	0.221	-0.01876		0.221	0.241	0.241	0.01136	0.2416	-0.04442		43.03	7.415	58.025	6.415	43.72	11.9	62.938	17.156	44.16	13.54	66.757	21.39									0.21	610051000	0.21	1024020000	0.21	544557000		2.2	0.00882	2.2	0.00202	2.2	0.00365
0.222	0.25911	0.242	0.01189	0.242	-0.03791	0.222	-0.01847		0.222	0.242	0.242	0.01174	0.26118	-0.03746		44.1	7.824			45.38	13.07	65.466	16.686	45.98	15.02	70.028	20.981									0.22	620336000	0.22	1013990000	0.22	541921000		2.3	0.00874	2.3	0.002	2.3	0.00364
0.223	0.27767	0.243	0.0152	0.243	-0.02818	0.223	-0.0182		0.223	0.243	0.243	0.015	0.27961	-0.02781		45.25	8.169			47.31	14.18	68.123	15.902	48.11	16.47	73.448	20.16									0.23	634817000	0.23	1011190000	0.23	543971000		2.4	0.00868	2.4	0.002	2.4	0.00361
0.224	0.293	0.244	0.02327	0.244	-0.01957	0.224	-0.01794		0.224	0.244	0.244	0.02294	0.29476	-0.01929		46.48	8.398			49.5	15.14	70.344	14.999	50.58	17.77	76.36	19.118									0.24	661045000	0.24	1015190000	0.24	551323000		2.5	0.00862	2.5	0.00199	2.5	0.00357
0.225	0.30778	0.245	0.02762	0.245	-0.01343	0.225	-0.0176		0.225	0.245	0.245	0.02721	0.30932	-0.01323		47.75	8.519			51.92	15.92	72.483	13.888	53.37	18.89	79.177	17.773									0.25	698390000	0.25	1030460000	0.25	556350000		2.6	0.00856	2.6	0.00198	2.6	0.00355
0.226	0.32933	0.246	0.02962	0.246	-0.00898	0.226	-0.01731		0.226	0.246	0.246	0.02915	0.33065	-0.00884		49.05	8.578			54.55	16.53	74.194	12.805	56.43	19.82	81.412	16.438									0.26	750125000	0.26	1059710000	0.26	569768000		2.7	0.00851	2.7	0.00198	2.7	0.00351
0.227	0.34633	0.247	0.03318	0.247	0.00131	0.227	-0.01703		0.227	0.247	0.247	0.03261	0.34737	0.00128		50.36	8.565			57.31	16.9	75.685	11.697	59.71	20.47	83.426	14.995									0.27	809417000	0.27	1093930000	0.27	593711000		2.8	0.00845	2.8	0.00197	2.8	0.00345
0.228	0.35478	0.248	0.0404	0.248	0.01168	0.228	-0.01675		0.228	0.248	0.248	0.03967	0.35549	0.01147		51.65	8.472			60.14	17	77.233	10.355	63.14	20.79	85.445	13.276									0.28	872078000	0.28	1137160000	0.28	623784000		2.9	0.00841	2.9	0.00196	2.9	0.0034
0.229	0.36678	0.249	0.04544	0.249	0.01665	0.229	-0.01649		0.229	0.249	0.249	0.04458	0.36714	0.01633		52.9	8.298			62.9	16.75	78.215	9.383	66.62	20.79	86.732	12.008									0.29	940926000	0.29	1189020000	0.29	659108000		3	0.00835	3	0.00196	3	0.00339
0.23	0.38844	0.25	0.04627	0.25	0.02116	0.23	-0.01619		0.23	0.25	0.25	0.04534	0.38844	0.02074		54.1	8.041			65.59	16.22	79.164	8.3356	70.07	20.44	87.96	10.644									0.3	1015590000	0.3	1254900000	0.3	700052000		3.1	0.00831	3.1	0.00195	3.1	0.00344
0.231	0.40933	0.251	0.05133	0.251	0.03198	0.231	-0.01599		0.231	0.251	0.251	0.05026	0.40892	0.03131		55.23	7.71			68.18	15.5	79.957	7.3652	73.41	19.74	88.976	9.3783									0.31	1094350000	0.31	1334010000	0.31	751502000		3.2	0.00825	3.2	0.00195	3.2	0.00342
0.232	0.42611	0.252	0.06011	0.252	0.04358	0.232	-0.01569		0.232	0.252	0.252	0.05879	0.42526	0.04262		56.29	7.327			70.58	14.59			76.51	18.71											0.32	1176910000	0.32	1427390000	0.32	807631000		3.3	0.00819	3.3	0.00196	3.3	0.0034
0.233	0.44178	0.253	0.0646	0.253	0.04831	0.233	-0.01547		0.233	0.253	0.253	0.06311	0.44045	0.0472		57.26	6.918			72.77	13.55			79.32	17.45											0.33	1260250000	0.33	1537690000	0.33	875421000		3.4	0.00814	3.4	0.00194	3.4	0.0034
0.234	0.46178	0.254	0.06609	0.254	0.05296	0.234	-0.01517		0.234	0.254	0.254	0.0645	0.45993	0.05168		58.13	6.503			74.67	12.46			81.79	16.1											0.34	1346900000	0.34	1651580000	0.34	949425000		3.5	0.00807	3.5	0.00193	3.5	0.00341
0.235	0.48267	0.255	0.07122	0.255	0.0624	0.235	-0.01488		0.235	0.255	0.255	0.06944	0.48025	0.06084		58.92	6.062			76.33	11.27			83.99	14.62											0.35	1434990000	0.35	1778010000	0.35	1026830000		3.6	0.00803	3.6	0.00194	3.6	0.00339
0.236	0.49656	0.256	0.07882	0.256	0.07189	0.236	-0.01467		0.236	0.256	0.256	0.07677	0.49358	0.07002						77.82	9.811			86.06	12.87											0.36	1521960000	0.36	1922850000	0.36	1116490000		3.7	0.00802	3.7	0.00192	3.7	0.00339
0.237	0.50789	0.257	0.08276	0.257	0.07644	0.237	-0.01439		0.237	0.257	0.257	0.08052	0.50433	0.07438						79.16	8.325			87.91	11.1											0.37	1612490000	0.37	2076230000	0.37	1216030000		3.8	0.00798	3.8	0.00192	3.8	0.00336
0.238	0.52544	0.258	0.08389	0.258	0.0806	0.238	-0.014		0.238	0.258	0.258	0.08154	0.52124	0.07834						80.34	7.067			89.45	9.517											0.38	1711350000	0.38	2233710000	0.38	1320740000		3.9	0.00794	3.9	0.00191	3.9	0.00334
0.239	0.54722	0.259	0.09027	0.259	0.09173	0.239	-0.01377		0.239	0.259	0.259	0.08765	0.5423	0.08907						81.28	6.09			90.61	8.215											0.39	1820650000	0.39	2408650000	0.39	1431660000		4	0.0079	4	0.00191	4	0.00335
0.24	0.56422	0.26	0.0978	0.26	0.10367	0.24	-0.01345		0.24	0.26	0.26	0.09487	0.55858	0.10056						81.98	5.368			91.46	7.217											0.4	1938870000	0.4	2597860000	0.4	1547060000		4.1	0.00786	4.1	0.0019	4.1	0.0033
0.241	0.576	0.261	0.10131	0.261	0.11027	0.241	-0.01318		0.241	0.261	0.261	0.09817	0.56966	0.10685						82.56	4.735			92.15	6.346											0.41	2063080000	0.41	2798210000	0.41	1669500000		4.2	0.00784	4.2	0.0019	4.2	0.00333
0.242	0.59478	0.262	0.1036	0.262	0.1148	0.242	-0.01287		0.242	0.262	0.262	0.10028	0.58764	0.11113						83.04	4.155			92.72	5.563											0.42	2187620000	0.42	3019110000	0.42	1804600000		4.3	0.00778	4.3	0.00189	4.3	0.00331
0.243	0.62011	0.263	0.1086	0.263	0.12469	0.243	-0.01267		0.243	0.263	0.263	0.10502	0.61205	0.12057						83.49	3.607			93.26	4.831											0.43	2315810000	0.43	3266330000	0.43	1946070000		4.4	0.00777	4.4	0.00189	4.4	0.00329
0.244	0.64111	0.264	0.114	0.264	0.13511	0.244	-0.01239		0.244	0.264	0.264	0.11012	0.63214	0.13052						83.86	3.122			93.76	4.179											0.44	2453260000	0.44	3529250000	0.44	2098040000		4.5	0.00775	4.5	0.00189	4.5	0.00329
0.245	0.651	0.265	0.11802	0.265	0.14347	0.245	-0.01204		0.245	0.265	0.265	0.11389	0.64124	0.13845						84.17	2.696			94.19	3.606											0.45	2599780000	0.45	3793830000	0.45	2256930000		4.6	0.00771	4.6	0.0018	4.6	0.00328
0.246	0.65956	0.266	0.11907	0.266	0.14922	0.246	-0.01177		0.246	0.266	0.266	0.11478	0.649	0.14385						84.45	2.332			94.56	3.109											0.46	2749900000	0.46	4059150000	0.46	2421000000		4.7	0.00769	4.7	0.00182	4.7	0.00329
0.247	0.68022	0.267	0.12327	0.267	0.15516	0.247	-0.01155		0.247	0.267	0.267	0.11871	0.66866	0.14941						84.74	1.964			94.9	2.62											0.47	2904230000	0.47	4335930000	0.47	2594660000		4.8	0.00767	4.8	0.0018	4.8	0.00318
0.248	0.70011	0.268	0.13202	0.268	0.16633	0.248	-0.0112		0.248	0.268	0.268	0.12701	0.68751	0.16001						84.89	1.607			95.14	2.167											0.48	3067640000	0.48	4638930000	0.48	2766400000		4.9	0.00763	4.9	0.00181	4.9	0.0032
0.249	0.71167	0.269	0.13604	0.269	0.17693	0.249	-0.01093		0.249	0.269	0.269	0.13074	0.69815	0.17003						85	1.347			95.34	1.827											0.49	3234100000	0.49	4969870000	0.49	2944320000		5	0.00763	5	0.00182	5	0.00324
0.25	0.72711	0.27	0.1372	0.27	0.18331	0.25	-0.01063		0.25	0.27	0.27	0.13171	0.71257	0.17598						85.24	1.178			95.56	1.586											0.5	3409350000	0.5	5303060000	0.5	3115850000		5.1	0.00757	5.1	0.00182	5.1	0.00324
0.251	0.74878	0.271	0.143	0.271	0.18867	0.251	-0.01029		0.251	0.271	0.271	0.13714	0.73305	0.18093						85.55	1.08			95.79	1.417											0.51	3602040000	0.51	5618760000	0.51	3272080000		5.2	0.00755	5.2	0.00183	5.2	0.00323
0.252	0.77356	0.272	0.1504	0.272	0.20076	0.252	-0.01007		0.252	0.272	0.272	0.14408	0.75654	0.19232						85.84	1.013			96.08	1.278											0.52	3785320000	0.52	5924230000	0.52	3431400000		5.3	0.00754	5.3	0.00183	5.3	0.00321
0.253	0.79122	0.273	0.15611	0.273	0.21302	0.253	-0.00981		0.253	0.273	0.273	0.1494	0.77302	0.20386						86.03	0.9402			96.37	1.173											0.53	3963650000	0.53	6198150000	0.53	3587720000		5.4	0.00751	5.4	0.00183	5.4	0.0032
0.254	0.79922	0.274	0.15933	0.274	0.21713	0.254	-0.00943		0.254	0.274	0.274	0.15232	0.78004	0.20758						86.16	0.8817			96.65	1.076											0.54	4155800000	0.54	6437860000	0.54	3751380000		5.5	0.0075	5.5	0.00181	5.5	0.00321
0.255	0.815	0.275	0.16551	0.275	0.22356	0.255	-0.00924		0.255	0.275	0.275	0.15806	0.79463	0.2135										96.89	1.003											0.55	4327660000	0.55	6630860000	0.55	3909250000		5.6	0.00747	5.6	0.00182	5.6	0.00319
0.256	0.84222	0.276	0.17338	0.276	0.23711	0.256	-0.00897		0.256	0.276	0.276	0.1654	0.82032	0.2262										97.05	0.9698											0.56	4511440000	0.56	6774890000	0.56	4043160000		5.7	0.00745	5.7	0.0018	5.7	0.00314
0.257	0.86056	0.277	0.1782	0.277	0.25089	0.257	-0.00867		0.257	0.277	0.277	0.16982	0.83732	0.2391										97.32	0.9174											0.57	4673230000	0.57	6868300000	0.57	4155800000		5.8	0.00744	5.8	0.00179	5.8	0.00315
0.258	0.87033	0.278	0.17993	0.278	0.256	0.258	-0.00834		0.258	0.278	0.278	0.1713	0.84596	0.24371										97.74	0.7971											0.58	4811690000	0.58	6868300000	0.58	4220860000		5.9	0.0074	5.9	0.0018	5.9	0.00315
0.259	0.88456	0.279	0.18451	0.279	0.26267	0.259	-0.00802		0.259	0.279	0.279	0.17547	0.8589	0.2498										98.03	0.6767											0.59	4952170000	0.59	6774890000	0.59	4245390000		6	0.00741	6	0.00179	6	0.00316
0.26	0.90967	0.28	0.19209	0.28	0.27356	0.26	-0.00779		0.26	0.28	0.28	0.18248	0.88238	0.25988										98.18	0.5055											0.6	5076750000	0.6	6600200000	0.6	4253580000		6.1	0.00737	6.1	0.00179	6.1	0.00315
0.261	0.92956	0.281	0.20042	0.281	0.28356	0.261	-0.0075		0.261	0.281	0.281	0.1902	0.90074	0.26909										98.31	0.3568											0.61	5157650000	0.61	6387540000	0.61	4229030000		6.2	0.00734	6.2	0.0018	6.2	0.0031
0.262	0.93867	0.282	0.20367	0.282	0.29156	0.262	-0.00723		0.262	0.282	0.282	0.19308	0.90863	0.27639										98.37	0.3927											0.62	5202880000	0.62	6119250000	0.62	4139610000		6.3	0.00733	6.3	0.00181	6.3	0.00312
0.263	0.95433	0.283	0.20802	0.283	0.29867	0.263	-0.00683		0.263	0.283	0.283	0.197	0.92284	0.28284										98.64	0.5696											0.63	5230100000	0.63	5827900000	0.63	4011260000		6.4	0.00729	6.4	0.0018	6.4	0.00311
0.264	0.97667	0.284	0.21618	0.284	0.30956	0.264	-0.00653		0.264	0.284	0.284	0.2045	0.94346	0.29284										98.96	0.8499											0.64	5211940000	0.64	5515620000	0.64	3861470000		6.5	0.0073	6.5	0.00179	6.5	0.00309
0.265	0.99544	0.285	0.22131	0.285	0.32	0.265	-0.00626		0.265	0.285	0.285	0.20914	0.9606	0.3024										99.32	1.074											0.65	5157650000	0.65	5193820000	0.65	3703040000		6.6	0.00725	6.6	0.00181	6.6	0.00312
0.266	1.01033	0.286	0.2222	0.286	0.32933	0.266	-0.006		0.266	0.286	0.286	0.20976	0.97396	0.31089										99.85	1.225											0.66	5058860000	0.66	4908060000	0.66	3553180000		6.7	0.00723	6.7	0.0018	6.7	0.00311
0.267	1.025	0.287	0.22733	0.287	0.33444	0.267	-0.00568		0.267	0.287	0.287	0.21438	0.98708	0.31538										100.5	1.328											0.67	4934500000	0.67	4664650000	0.67	3413020000		6.8	0.00722	6.8	0.00181	6.8	0.0031
0.268	1.043	0.288	0.23689	0.288	0.34311	0.268	-0.00543		0.268	0.288	0.288	0.22315	1.00337	0.32321																						0.68	4776890000	0.68	4477740000	0.68	3278550000		6.9	0.00717	6.9	0.00179	6.9	0.00311
0.269	1.06467	0.289	0.24444	0.289	0.35778	0.269	-0.00511		0.269	0.289	0.289	0.23002	1.02314	0.33667																						0.69	4579220000	0.69	4319400000	0.69	3139750000		7	0.00717	7	0.0018	7	0.0031
0.27	1.07689	0.29	0.24844	0.29	0.368	0.27	-0.00483		0.27	0.29	0.29	0.23354	1.03381	0.34592																						0.7	4377400000	0.7	4180140000	0.7	3013590000		7.1	0.00716	7.1	0.00179	7.1	0.0031
0.271	1.09078	0.291	0.25644	0.291	0.37378	0.271	-0.00453		0.271	0.291	0.291	0.2408	1.04606	0.35098																						0.71	4188270000	0.71	4107330000	0.71	2913720000		7.2	0.00715	7.2	0.00178	7.2	0.00312
0.272	1.11222	0.292	0.26778	0.292	0.38444	0.272	-0.00425		0.272	0.292	0.292	0.25118	1.06551	0.36061																						0.72	4003300000	0.72	4107330000	0.72	2838240000		7.3	0.00712	7.3	0.00179	7.3	0.00309
0.273	1.13778	0.293	0.27378	0.293	0.39778	0.273	-0.00399		0.273	0.293	0.293	0.25653	1.08885	0.37272																						0.73	3812430000	0.73	4147700000	0.73	2784270000		7.4	0.00711	7.4	0.00179	7.4	0.00308
0.274	1.15667	0.294	0.27644	0.294	0.41133	0.274	-0.00367		0.274	0.294	0.294	0.25875	1.10577	0.38501																						0.74	3654270000	0.74	4253580000	0.74	2736730000		7.5	0.00708	7.5	0.00178	7.5	0.00308
0.275	1.16778	0.295	0.28489	0.295	0.42022	0.275	-0.00335		0.275	0.295	0.295	0.26637	1.11523	0.39291																						0.75	3513590000	0.75	4419070000	0.75	2715740000		7.6	0.00707	7.6	0.00179	7.6	0.00306
0.276	1.18222	0.296	0.29378	0.296	0.42511	0.276	-0.00302		0.276	0.296	0.296	0.27439	1.12784	0.39705																						0.76	3393960000	0.76	4647500000	0.76	2726880000		7.7	0.00706	7.7	0.0018	7.7	0.00304
0.277	1.2	0.297	0.29778	0.297	0.43289	0.277	-0.0027		0.277	0.297	0.297	0.27783	1.1436	0.40389																						0.77	3299450000	0.77	4925680000	0.77	2761110000		7.8	0.00705	7.8	0.00178	7.8	0.00301
0.278	1.21889	0.298	0.30133	0.298	0.44689	0.278	-0.00249		0.278	0.298	0.298	0.28084	1.16038	0.4165																						0.78	3224810000	0.78	5266520000	0.78	2830210000		7.9	0.00701	7.9	0.00179	7.9	0.003
0.279	1.23222	0.299	0.31156	0.299	0.45644	0.279	-0.00223		0.279	0.299	0.299	0.29006	1.17184	0.42495																						0.79	3184970000	0.79	5713350000	0.79	2937510000		8	0.00701	8	0.00178	8	0.00301
0.28	1.24333	0.3	0.32244	0.3	0.46289	0.28	-0.00188		0.28	0.3	0.3	0.29987	1.18117	0.43049																						0.8	3181430000	0.8	6227860000	0.8	3068340000		8.1	0.00698	8.1	0.00178	8.1	0.00301
0.281	1.26667	0.301	0.32667	0.301	0.47556	0.281	-0.00167		0.281	0.301	0.301	0.30347	1.20207	0.44179																						0.81	3219820000	0.81	6826710000	0.81	3232670000		8.2	0.00696	8.2	0.00176	8.2	0.003
0.282	1.29222	0.302	0.332	0.302	0.48956	0.282	-0.00132		0.282	0.302	0.302	0.3081	1.22503	0.45431																						0.82	3287920000	0.82	7485620000	0.82	3440970000		8.3	0.00695	8.3	0.00178	8.3	0.003
0.283	1.30667	0.303	0.34333	0.303	0.50333	0.283	-0.000976		0.283	0.303	0.303	0.31827	1.23741	0.46659																						0.83	3377140000	0.83	8197620000	0.83	3672520000		8.4	0.00694	8.4	0.0018	8.4	0.003
0.284	1.31444	0.304	0.35311	0.304	0.51133	0.284	-0.000732		0.284	0.304	0.304	0.32698	1.24346	0.47349																						0.84	3506150000	0.84	8953850000	0.84	3940740000		8.5	0.00694	8.5	0.0018	8.5	0.003
0.285	1.33444	0.305	0.36	0.305	0.51956	0.285	-0.000488		0.285	0.305	0.305	0.333	1.26105	0.48059																						0.85	3695400000	0.85	9743430000	0.85	4253580000		8.6	0.00691	8.6	0.00177	8.6	0.00298
0.286	1.35667	0.306	0.36378	0.306	0.53444	0.286	-0.0002361		0.286	0.306	0.306	0.33613	1.28069	0.49383																						0.86	3925760000	0.86	10579300000	0.86	4562220000		8.7	0.00692	8.7	0.00178	8.7	0.00298
0.287	1.36556	0.307	0.372	0.307	0.54422	0.287	0.0001023		0.287	0.307	0.307	0.34336	1.28772	0.50232																						0.87	4196400000	0.87	11449600000	0.87	4899260000		8.8	0.00688	8.8	0.00176	8.8	0.00297
0.288	1.37556	0.308	0.38267	0.308	0.55156	0.288	0.0003857		0.288	0.308	0.308	0.35282	1.29577	0.50853																						0.88	4486150000	0.88	12312400000	0.88	5266520000		8.9	0.00688	8.9	0.00177	8.9	0.00299
0.289	1.39667	0.309	0.38867	0.309	0.56111	0.289	0.0007635		0.289	0.309	0.309	0.35796	1.31426	0.51678																						0.89	4811690000	0.89	13163200000	0.89	5665960000		9	0.00687	9	0.00176	9	0.00297
0.29	1.41667	0.31	0.39222	0.31	0.57356	0.29	0.00105		0.29	0.31	0.31	0.36084	1.33167	0.52767																						0.9	5193820000	0.9	14027600000	0.9	6089800000		9.1	0.00684	9.1	0.00175	9.1	0.00297
0.291	1.43111	0.311	0.40178	0.311	0.58689	0.291	0.00126		0.291	0.311	0.311	0.36923	1.34381	0.53935																						0.91	5628190000	0.91	14934800000	0.91	6528920000		9.2	0.00683	9.2	0.00176	9.2	0.00297
0.292	1.44333	0.312	0.41489	0.312	0.59556	0.292	0.00151		0.292	0.312	0.312	0.38087	1.35385	0.54672																						0.92	6080000000	0.92	15823000000	0.92	6972840000		9.3	0.00682	9.3	0.00174	9.3	0.00298
0.293	1.46222	0.313	0.42378	0.313	0.60044	0.293	0.0018		0.293	0.313	0.313	0.3886	1.3701	0.55061																						0.93	6518770000	0.93	16688100000	0.93	7453040000		9.4	0.0068	9.4	0.00174	9.4	0.00297
0.294	1.48444	0.314	0.42778	0.314	0.60911	0.294	0.00207		0.294	0.314	0.314	0.39184	1.38944	0.55795																						0.94	6951870000	0.94	17559500000	0.94	7971640000		9.5	0.00675	9.5	0.00176	9.5	0.00297
0.295	1.49667	0.315	0.43667	0.315	0.62533	0.295	0.00242		0.295	0.315	0.315	0.39955	1.39938	0.57218																						0.95	7431350000	0.95	18385000000	0.95	8472960000		9.6	0.00675	9.6	0.00177	9.6	0.00298
0.296	1.50222	0.316	0.45089	0.316	0.63756	0.296	0.00261		0.296	0.316	0.316	0.41211	1.40308	0.58273																						0.96	7904470000	0.96	19177100000	0.96	8965740000		9.7	0.00676	9.7	0.00176	9.7	0.00295
0.297	1.51889	0.317	0.458	0.317	0.64444	0.297	0.00292		0.297	0.317	0.317	0.41815	1.41712	0.58838																						0.97	8380670000	0.97	19950400000	0.97	9460230000		9.8	0.00674	9.8	0.00176	9.8	0.00296
0.298	1.54	0.318	0.46356	0.318	0.65444	0.298	0.00313		0.298	0.318	0.318	0.42276	1.43528	0.59685																						0.98	8858970000	0.98	20721000000	0.98	9955450000		9.9	0.00673	9.9	0.0018	9.9	0.00295
0.299	1.55556	0.319	0.47622	0.319	0.66733	0.299	0.00332		0.299	0.319	0.319	0.43384	1.44822	0.60794																						0.99	9326260000	0.99	21487700000	0.99	10450400000		10	0.00677	10	0.00183	10	0.00297
0.3	1.56667	0.32	0.48578	0.32	0.67733	0.3	0.00364		0.3	0.32	0.32	0.44206	1.457	0.61637																						1	9818000000	1	22230800000	1	10931200000		10.1	0.53784	10.1	0.03289	10.1	1.74578
0.301	1.58444	0.321	0.49244	0.321	0.68356	0.301	0.00391		0.301	0.321	0.321	0.44763	1.47195	0.62135																						1.01	10309600000	1.01	22948500000	1.01	11436100000		10.2	4.32941	10.2	3.00889	10.2	2.69556
0.302	1.60889	0.322	0.49867	0.322	0.69667	0.302	0.00416		0.302	0.322	0.322	0.45279	1.49305	0.63257																						1.02	10761000000	1.02	23600300000	1.02	11938800000		10.3	4.34118	10.3	2.95556	10.3	2.68444
0.303	1.62333	0.323	0.50933	0.323	0.71244	0.303	0.00441		0.303	0.323	0.323	0.46197	1.50483	0.64619																						1.03	11155700000	1.03	24241700000	1.03	12410200000		10.4	4.36275	10.4	2.96	10.4	2.66889
0.304	1.63	0.324	0.52	0.324	0.72311	0.304	0.00461		0.304	0.324	0.324	0.47112	1.50938	0.65514																						1.04	11530400000	1.04	24871800000	1.04	12890700000		10.5	4.34314	10.5	2.94667	10.5	2.67556
0.305	1.64111	0.325	0.52933	0.325	0.73	0.305	0.00487		0.305	0.325	0.325	0.47905	1.51803	0.66065																						1.05	11911300000	1.05	25449800000	1.05	13336800000		10.6	4.35098	10.6	2.94889	10.6	2.66
0.306	1.66556	0.326	0.536	0.326	0.73956	0.306	0.00515		0.306	0.326	0.326	0.48454	1.53897	0.66856																						1.06	12312400000	1.06	26034500000	1.06	13731500000		10.7	4.34902	10.7	2.94222	10.7	2.66667
0.307	1.68778	0.327	0.546	0.327	0.75356	0.307	0.00536		0.307	0.327	0.327	0.49304	1.55782	0.68046																						1.07	12663400000	1.07	26625900000	1.07	14117000000		10.8	4.35882	10.8	2.93778	10.8	2.65111
0.308	1.69778	0.328	0.56044	0.328	0.766	0.308	0.00558		0.308	0.328	0.328	0.50552	1.56535	0.69093																						1.08	13019400000	1.08	27182400000	1.08	14538200000		10.9	4.35686	10.9	2.93778	10.9	2.65333
0.309	1.70667	0.329	0.57133	0.329	0.77333	0.309	0.00579		0.309	0.329	0.329	0.51477	1.57184	0.69677																						1.09	13409400000	1.09	27786500000	1.09	14996300000		11	4.36667	11	2.91111	11	2.63333
0.31	1.72889	0.33	0.57578	0.33	0.78422	0.31	0.00594		0.31	0.33	0.33	0.5182	1.59058	0.7058																						1.1	13760900000	1.1	28355000000	1.1	15430300000		11.1	4.36471	11.1	2.91778	11.1	2.64222
0.311	1.75111	0.331	0.58667	0.331	0.79889	0.311	0.00613		0.311	0.331	0.331	0.52741	1.60927	0.7182																						1.11	14057400000	1.11	28886500000	1.11	15854600000		11.2	4.36078	11.2	2.93333	11.2	2.64667
0.312	1.76556	0.332	0.60267	0.332	0.81289	0.312	0.0063		0.312	0.332	0.332	0.54119	1.62078	0.72997																						1.12	14372000000	1.12	29358200000	1.12	16268700000		11.3	4.34706	11.3	2.93556	11.3	2.64222
0.313	1.77556	0.333	0.608	0.333	0.82267	0.313	0.00649		0.313	0.333	0.333	0.54538	1.62818	0.73793																						1.13	14674900000	1.13	29812100000	1.13	16671800000		11.4	4.3549	11.4	2.91333	11.4	2.64444
0.314	1.79222	0.334	0.61356	0.334	0.82889	0.314	0.0067		0.314	0.334	0.334	0.54975	1.64168	0.74268																						1.14	14980900000	1.14	30269500000	1.14	17063500000		11.5	4.35882	11.5	2.92	11.5	2.63111
0.315	1.81667	0.335	0.62711	0.335	0.84089	0.315	0.00689		0.315	0.335	0.335	0.56126	1.66225	0.7526																						1.15	15274600000	1.15	30774500000	1.15	17459800000		11.6	4.35686	11.6	2.90444	11.6	2.62444
0.316	1.83889	0.336	0.64044	0.336	0.85489	0.316	0.00701		0.316	0.336	0.336	0.57256	1.68074	0.76427																						1.16	15571100000	1.16	31261400000	1.16	17843800000		11.7	4.34902	11.7	2.90889	11.7	2.61778
0.317	1.84889	0.337	0.64889	0.337	0.86489	0.317	0.00717		0.317	0.337	0.337	0.57946	1.68804	0.77235																						1.17	15902100000	1.17	31774500000	1.17	18231900000		11.8	4.35294	11.8	2.90889	11.8	2.62444
0.318	1.85667	0.338	0.65489	0.338	0.87267	0.318	0.00731		0.318	0.338	0.338	0.58416	1.69328	0.77842																						1.18	16188600000	1.18	32246600000	1.18	18658600000		11.9	4.35294	11.9	2.89778	11.9	2.60667
0.319	1.87667	0.339	0.66667	0.339	0.88422	0.319	0.00742		0.319	0.339	0.339	0.594	1.70964	0.78784																						1.19	16461600000	1.19	32654100000	1.19	19072800000		12	4.33922	12	2.9	12	2.61778
0.32	1.89778	0.34	0.68067	0.34	0.89978	0.32	0.00756		0.32	0.34	0.34	0.60579	1.72698	0.8008																						1.2	16720500000	1.2	33087000000	1.2	19421500000		12.1	4.35294	12.1	2.88889	12.1	2.62222
0.321	1.90111	0.341	0.68778	0.341	0.91267	0.321	0.0077		0.321	0.341	0.341	0.61143	1.72811	0.81136																						1.21	16965200000	1.21	33522700000	1.21	19791000000		12.2	4.3451	12.2	2.89556	12.2	2.60889
0.322	1.90556	0.342	0.694	0.342	0.91933	0.322	0.00775		0.322	0.342	0.342	0.61627	1.73024	0.81637																						1.22	17228100000	1.22	33938100000	1.22	20199700000		12.3	4.34706	12.3	2.90444	12.3	2.60444
0.323	1.93111	0.343	0.70489	0.343	0.92667	0.323	0.00784		0.323	0.343	0.343	0.62524	1.75152	0.82195																						1.23	17493000000	1.23	34379400000	1.23	20576500000		12.4	4.33333	12.4	2.89556	12.4	2.61111
0.324	1.95111	0.344	0.72111	0.344	0.93733	0.324	0.00789		0.324	0.344	0.344	0.6389	1.76771	0.83048																						1.24	17759900000	1.24	34870400000	1.24	20938600000		12.5	4.32745	12.5	2.89778	12.5	2.61778
0.325	1.96222	0.345	0.73044	0.345	0.94756	0.325	0.00795		0.325	0.345	0.345	0.64644	1.77581	0.83859																						1.25	18012000000	1.25	35365000000	1.25	21267200000		12.6	4.34118	12.6	2.89556	12.6	2.59778
0.326	1.97333	0.346	0.73578	0.346	0.95289	0.326	0.00804		0.326	0.346	0.346	0.65043	1.78389	0.84235																						1.26	18231900000	1.26	35839200000	1.26	21635300000		12.7	4.34706	12.7	2.88222	12.7	2.60889
0.327	1.99444	0.347	0.74844	0.347	0.96333	0.327	0.00807		0.327	0.347	0.347	0.66088	1.80098	0.85062																						1.27	18470200000	1.27	36292600000	1.27	22025200000		12.8	4.34118	12.8	2.87556	12.8	2.60444
0.328	2.01667	0.348	0.76578	0.348	0.97778	0.328	0.00812		0.328	0.348	0.348	0.67542	1.81903	0.8624																						1.28	18727300000	1.28	36724800000	1.28	22343400000		12.9	4.33333	12.9	2.86444	12.9	2.60222
0.329	2.02333	0.349	0.77244	0.349	0.99422	0.329	0.00808		0.329	0.349	0.349	0.68052	1.82302	0.87591																						1.29	18968800000	1.29	37135300000	1.29	22682800000		13	4.34314	13	2.88222	13	2.61556
0.33	2.02667	0.35	0.77667	0.35	1.00444	0.33	0.00812		0.33	0.35	0.35	0.68347	1.824	0.88391																						1.3	19211900000	1.3	37621200000	1.3	23005600000		13.1	4.3451	13.1	2.86889	13.1	2.60444
0.331	2.04444	0.351	0.78933	0.351	1.01267	0.331	0.00812		0.331	0.351	0.351	0.69382	1.83796	0.89013																						1.31	19456500000	1.31	38110300000	1.31	23311600000		13.2	4.35294	13.2	2.87778	13.2	2.59556
0.332	2.06778	0.352	0.80089	0.352	1.02422	0.332	0.00808		0.332	0.352	0.352	0.70318	1.85686	0.89927																						1.32	19667500000	1.32	38553100000	1.32	23638900000		13.3	4.33922	13.3	2.88	13.3	2.59111
0.333	2.08444	0.353	0.81156	0.353	1.04222	0.333	0.008		0.333	0.353	0.353	0.71173	1.86975	0.91403																						1.33	19879500000	1.33	39023400000	1.33	23949100000		13.4	4.34706	13.4	2.87111	13.4	2.58889
0.334	2.09222	0.354	0.816	0.354	1.05378	0.334	0.00799		0.334	0.354	0.354	0.71482	1.87463	0.92311																						1.34	20110500000	1.34	39496500000	1.34	24280800000		13.5	4.34118	13.5	2.87778	13.5	2.58889
0.335	2.10444	0.355	0.83156	0.355	1.05689	0.335	0.00798		0.335	0.355	0.355	0.72761	1.88348	0.92478																						1.35	20360800000	1.35	39872000000	1.35	24634500000		13.6	4.33333	13.6	2.88667	13.6	2.59111
0.336	2.12778	0.356	0.84956	0.356	1.06844	0.336	0.00786		0.336	0.356	0.356	0.74251	1.90223	0.93382																													13.7	4.33333	13.7	2.87333	13.7	2.58
0.337	2.14111	0.357	0.85578	0.357	1.08622	0.337	0.00782		0.337	0.357	0.357	0.74709	1.91201	0.94827																													13.8	4.33922	13.8	2.86444	13.8	2.57111
0.338	2.14889	0.358	0.86378	0.358	1.09933	0.338	0.00774		0.338	0.358	0.358	0.75321	1.91681	0.95862																													13.9	4.32941	13.9	2.85778	13.9	2.59111
0.339	2.16222	0.359	0.88089	0.359	1.10267	0.339	0.00756		0.339	0.359	0.359	0.76725	1.92654	0.96042																													14	4.33529	14	2.86222	14	2.57333
0.34	2.18111	0.36	0.89422	0.36	1.108	0.34	0.00759		0.34	0.36	0.36	0.77797	1.94119	0.96396																													14.1	4.32941	14.1	2.86889	14.1	2.58667
0.341	2.20333	0.361	0.90044	0.361	1.12422	0.341	0.00753		0.341	0.361	0.361	0.78249	1.95876	0.97695																													14.2	4.33529	14.2	2.87111	14.2	2.57778
0.342	2.20667	0.362	0.90489	0.362	1.13867	0.342	0.00738		0.342	0.362	0.362	0.78544	1.95952	0.98836																													14.3	4.33333	14.3	2.87111	14.3	2.57333
0.343	2.21222	0.363	0.91711	0.363	1.14422	0.343	0.00722		0.343	0.363	0.363	0.79514	1.96224	0.99204																													14.4	4.32745	14.4	2.86667	14.4	2.57333
0.344	2.24111	0.364	0.93178	0.364	1.15	0.344	0.00701		0.344	0.364	0.364	0.80692	1.98562	0.9959																													14.5	4.32157	14.5	2.86444	14.5	2.58222
0.345	2.26333	0.365	0.938	0.365	1.16044	0.345	0.00688		0.345	0.365	0.365	0.81137	2.00305	1.00378																													14.6	4.33137	14.6	2.85778	14.6	2.57778
0.346	2.26444	0.366	0.94556	0.366	1.17622	0.346	0.00671		0.346	0.366	0.366	0.81696	2.00177	1.01626																													14.7	4.32941	14.7	2.86	14.7	2.58
0.347	2.27	0.367	0.96156	0.367	1.186	0.347	0.00652		0.347	0.367	0.367	0.82982	2.00441	1.02352																													14.8	4.33333	14.8	2.86222	14.8	2.57111
0.348	2.28778	0.368	0.97444	0.368	1.19467	0.348	0.00628		0.348	0.368	0.368	0.83997	2.01782	1.0298																													14.9	4.31569	14.9	2.86222	14.9	2.57778
0.349	2.30556	0.369	0.98444	0.369	1.20178	0.349	0.00612		0.349	0.369	0.369	0.84761	2.03119	1.03473																													15	4.32353	15	2.86222	15	2.57111
0.35	2.31667	0.37	0.99178	0.37	1.21756	0.35	0.0059		0.35	0.37	0.37	0.85293	2.03867	1.0471																													15.1	4.31961	15.1	2.85778	15.1	2.57111
0.351	2.32667	0.371	1.00444	0.371	1.22756	0.351	0.00568		0.351	0.371	0.371	0.86282	2.04514	1.05447																													15.2	4.32353	15.2	2.84667	15.2	2.58444
0.352	2.34111	0.372	1.02267	0.372	1.22778	0.352	0.00542		0.352	0.372	0.372	0.87745	2.0555	1.05343																													15.3	4.32353	15.3	2.85333	15.3	2.57111
0.353	2.36222	0.373	1.03089	0.373	1.23689	0.353	0.00526		0.353	0.373	0.373	0.88347	2.07167	1.06001																													15.4	4.33529	15.4	2.86	15.4	2.55778
0.354	2.37889	0.374	1.03422	0.374	1.25267	0.354	0.00509		0.354	0.374	0.374	0.88529	2.08391	1.07228																													15.5	4.32353	15.5	2.86222	15.5	2.56222
0.355	2.38889	0.375	1.04844	0.375	1.268	0.355	0.00484		0.355	0.375	0.375	0.89642	2.09028	1.08414																													15.6	4.31373	15.6	2.85333	15.6	2.56667
0.356	2.39444	0.376	1.06356	0.376	1.27667	0.356	0.00459		0.356	0.376	0.376	0.90828	2.09274	1.09027																													15.7	4.31176	15.7	2.84889	15.7	2.56667
0.357	2.41667	0.377	1.07289	0.377	1.286	0.357	0.00431		0.357	0.377	0.377	0.91517	2.10975	1.09696																													15.8	4.31961	15.8	2.85778	15.8	2.57111
0.358	2.43556	0.378	1.08089	0.378	1.30222	0.358	0.00409		0.358	0.378	0.378	0.92092	2.1238	1.10949																													15.9	4.32157	15.9	2.85556	15.9	2.56444
0.359	2.44	0.379	1.09089	0.379	1.31333	0.359	0.0039		0.359	0.379	0.379	0.92835	2.12524	1.11765																													16	4.3098	16	2.84222	16	2.57333
0.36	2.44778	0.38	1.10356	0.38	1.31533	0.36	0.00375		0.36	0.38	0.38	0.93802	2.12957	1.11803																													16.1	4.3098	16.1	2.84222	16.1	2.56667
0.361	2.46444	0.381	1.11333	0.381	1.31956	0.361	0.00348		0.361	0.381	0.381	0.94522	2.1416	1.1203																													16.2	4.32745	16.2	2.86	16.2	2.55333
0.362	2.48889	0.382	1.12311	0.382	1.33378	0.362	0.00322		0.362	0.382	0.382	0.9524	2.16036	1.13104																													16.3	4.31176	16.3	2.84444	16.3	2.56667
0.363	2.50778	0.383	1.13822	0.383	1.34911	0.363	0.00302		0.363	0.383	0.383	0.96407	2.17424	1.1427																													16.4	4.31176	16.4	2.83111	16.4	2.55778
0.364	2.51778	0.384	1.15444	0.384	1.35756	0.364	0.00279		0.364	0.384	0.384	0.97666	2.1804	1.14849																													16.5	4.30588	16.5	2.84667	16.5	2.55778
0.365	2.52	0.385	1.16378	0.385	1.36289	0.365	0.00259		0.365	0.385	0.385	0.98339	2.1798	1.15164																													16.6	4.3098	16.6	2.84222	16.6	2.55333
0.366	2.53333	0.386	1.16556	0.386	1.37444	0.366	0.0025		0.366	0.386	0.386	0.98373	2.1888	1.16003																													16.7	4.31569	16.7	2.84222	16.7	2.56444
0.367	2.55444	0.387	1.17756	0.387	1.394	0.367	0.00239		0.367	0.387	0.387	0.99268	2.20449	1.17514																													16.8	4.31176	16.8	2.84222	16.8	2.54667
0.368	2.56778	0.388	1.19133	0.388	1.39933	0.368	0.00217		0.368	0.388	0.388	1.0031	2.21342	1.17824																													16.9	4.31569	16.9	2.83778	16.9	2.55111
0.369	2.57111	0.389	1.19644	0.389	1.39911	0.369	0.00198		0.369	0.389	0.389	1.00621	2.21373	1.17665																													17	4.32157	17	2.83778	17	2.56667
0.37	2.58222	0.39	1.20067	0.39	1.41222	0.37	0.00181		0.37	0.39	0.39	1.00856	2.22071	1.18627																													17.1	4.3098	17.1	2.84	17.1	2.55111
0.371	2.60333	0.391	1.21844	0.391	1.43067	0.371	0.00161		0.371	0.391	0.391	1.02227	2.23626	1.20033																													17.2	4.31176	17.2	2.84222	17.2	2.56
0.372	2.62222	0.392	1.238	0.392	1.43667	0.372	0.00147		0.372	0.392	0.392	1.03744	2.24987	1.20393																													17.3	4.30784	17.3	2.84	17.3	2.55333
0.373	2.62444	0.393	1.25111	0.393	1.436	0.373	0.00137		0.373	0.393	0.393	1.04718	2.24915	1.20193																													17.4	4.31373	17.4	2.83556	17.4	2.55556
0.374	2.62333	0.394	1.25444	0.394	1.44911	0.374	0.00119		0.374	0.394	0.394	1.04872	2.24557	1.21146																													17.5	4.30392	17.5	2.83556	17.5	2.54889
0.375	2.64222	0.395	1.27022	0.395	1.46622	0.375	0.00116		0.375	0.395	0.395	1.06064	2.2591	1.2243																													17.6	4.3098	17.6	2.83556	17.6	2.56222
0.376	2.66667	0.396	1.28867	0.396	1.47222	0.376	0.0009996		0.376	0.396	0.396	1.07475	2.27733	1.22783																													17.7	4.30588	17.7	2.82667	17.7	2.54889
0.377	2.67889	0.397	1.28844	0.397	1.47044	0.377	0.0008973		0.377	0.397	0.397	1.07327	2.28509	1.22488																													17.8	4.31569	17.8	2.82667	17.8	2.54889
0.378	2.68667	0.398	1.29311	0.398	1.486	0.378	0.0007792		0.378	0.398	0.398	1.07587	2.28904	1.23635																													17.9	4.30588	17.9	2.83556	17.9	2.54444
0.379	2.7	0.399	1.31689	0.399	1.50778	0.379	0.0008029		0.379	0.399	0.399	1.09433	2.2977	1.25296																													18	4.30392	18	2.83556	18	2.55111
0.38	2.72444	0.4	1.32933	0.4	1.51822	0.38	0.0006061		0.38	0.4	0.4	1.10335	2.31578	1.26012																													18.1	4.30196	18.1	2.82667	18.1	2.54667
0.381	2.73222	0.401	1.33467	0.401	1.522	0.381	0.0004959		0.381	0.401	0.401	1.10644	2.31966	1.26174																													18.2	4.30588	18.2	2.83556	18.2	2.55111
0.382	2.73111	0.402	1.34222	0.402	1.53267	0.382	0.0004408		0.382	0.402	0.402	1.11136	2.31598	1.26905																													18.3	4.29412	18.3	2.82222	18.3	2.54
0.383	2.74333	0.403	1.356	0.403	1.55044	0.383	0.0003542		0.383	0.403	0.403	1.12141	2.3236	1.28222																													18.4	4.30392	18.4	2.82444	18.4	2.55333
0.384	2.76222	0.404	1.37089	0.404	1.55867	0.384	0.0002597		0.384	0.404	0.404	1.13235	2.33684	1.28746																													18.5	4.28431	18.5	2.82	18.5	2.54
0.385	2.77778	0.405	1.37822	0.405	1.55156	0.385	0.0002755		0.385	0.405	0.405	1.13703	2.34722	1.28003																													18.6	4.29608	18.6	2.81778	18.6	2.54667
0.386	2.78667	0.406	1.38244	0.406	1.55556	0.386	0.0002047		0.386	0.406	0.406	1.13913	2.35195	1.28178																													18.7	4.28627	18.7	2.82444	18.7	2.54222
0.387	2.8	0.407	1.39578	0.407	1.57556	0.387	0.0001338		0.387	0.407	0.407	1.14873	2.3604	1.29668																													18.8	4.30392	18.8	2.82444	18.8	2.54444
0.388	2.82444	0.408	1.41311	0.408	1.58578	0.388	1.574e-05		0.388	0.408	0.408	1.16158	2.37818	1.30351																													18.9	4.28431	18.9	2.82444	18.9	2.53111
0.389	2.84	0.409	1.424	0.409	1.59156	0.389	3.149e-05		0.389	0.409	0.409	1.1691	2.38844	1.30667																													19	4.29216	19	2.81556	19	2.54667
0.39	2.84333	0.41	1.42711	0.41	1.602	0.39	-4.723e-05		0.39	0.41	0.41	1.17023	2.3884	1.31364																													19.1	4.3098	19.1	2.82667	19.1	2.54222
0.391	2.84444	0.411	1.438	0.411	1.62267	0.391	4.723e-05		0.391	0.411	0.411	1.17772	2.38649	1.32896																													19.2	4.30392	19.2	2.83111	19.2	2.54889
0.392	2.86222	0.412	1.45156	0.412	1.64022	0.392	1.179e-09		0.392	0.412	0.412	1.18737	2.39854	1.3417																													19.3	4.28627	19.3	2.83333	19.3	2.54889
0.393	2.88444	0.413	1.45511	0.413	1.64022	0.393	-3.935e-05		0.393	0.413	0.413	1.18883	2.41428	1.34006																													19.4	4.3	19.4	2.81556	19.4	2.53556
0.394	2.88667	0.414	1.46178	0.414	1.64311	0.394	-0.0001338		0.394	0.414	0.414	1.19281	2.41325	1.34078																													19.5	4.29216	19.5	2.81333	19.5	2.54
0.395	2.87556	0.415	1.47911	0.415	1.65778	0.395	-0.0001259		0.395	0.415	0.415	1.20548	2.40109	1.35109																													19.6	4.28627	19.6	2.81333	19.6	2.53556
0.396	2.89222	0.416	1.50022	0.416	1.66867	0.396	-7.871e-05		0.396	0.416	0.416	1.22118	2.41211	1.35829																													19.7	4.28235	19.7	2.81111	19.7	2.54222
0.397	2.91444	0.417	1.50933	0.417	1.672	0.397	-0.0001889		0.397	0.417	0.417	1.22709	2.42773	1.35934																													19.8	4.29412	19.8	2.80222	19.8	2.54
0.398	2.91333	0.418	1.51	0.418	1.67311	0.398	-0.0001338		0.398	0.418	0.418	1.22612	2.42389	1.35857																													19.9	4.31569	19.9	2.80444	19.9	2.52444
0.399	2.91444	0.419	1.52267	0.419	1.68867	0.399	-0.0001653		0.399	0.419	0.419	1.23488	2.4219	1.36951																													20	4.30784	20	2.81333	20	2.53556
0.4	2.93778	0.42	1.544	0.42	1.70111	0.4	-0.0002046		0.4	0.42	0.42	1.25064	2.43836	1.3779																													20.1	4.30392	20.1	2.81111	20.1	2.53333
0.401	2.96556	0.421	1.554	0.421	1.71111	0.401	-0.0001574		0.401	0.421	0.421	1.25719	2.45845	1.38429																													20.2	4.30392	20.2	2.82	20.2	2.53778
0.402	2.98222	0.422	1.55467	0.422	1.71289	0.402	-0.000181		0.402	0.422	0.422	1.25617	2.46928	1.38401																													20.3	4.30588	20.3	2.80667	20.3	2.54
0.403	2.98889	0.423	1.566	0.423	1.72244	0.403	-0.0002204		0.403	0.423	0.423	1.26376	2.47181	1.39001																													20.4	4.30784	20.4	2.81778	20.4	2.52889
0.404	3.00667	0.424	1.57978	0.424	1.74022	0.404	-0.0001574		0.404	0.424	0.424	1.2733	2.48351	1.40262																													20.5	4.30784	20.5	2.80667	20.5	2.52444
0.405	3.02889	0.425	1.59044	0.425	1.75156	0.405	-7.871e-05		0.405	0.425	0.425	1.28031	2.49883	1.41																													20.6	4.32157	20.6	2.80222	20.6	2.53111
0.406	3.03556	0.426	1.59889	0.426	1.75044	0.406	-0.0001181		0.406	0.426	0.426	1.28551	2.5013	1.40736																													20.7	4.30588	20.7	2.81556	20.7	2.53556
0.407	3.02778	0.427	1.61578	0.427	1.752	0.407	-0.0001653		0.407	0.427	0.427	1.29747	2.49186	1.40686																													20.8	4.30196	20.8	2.81778	20.8	2.53111
0.408	3.03778	0.428	1.63578	0.428	1.77022	0.408	-0.0001181		0.408	0.428	0.428	1.31189	2.49705	1.41972																													20.9	4.3098	20.9	2.82	20.9	2.52444
0.409	3.06	0.429	1.64578	0.429	1.77756	0.409	-6.297e-05		0.409	0.429	0.429	1.31827	2.51226	1.42382																													21	4.31176	21	2.82889	21	2.51778
0.41	3.07	0.43	1.64756	0.43	1.77133	0.41	-0.0001338		0.41	0.43	0.43	1.31804	2.5174	1.41707																													21.1	4.30588	21.1	2.82222	21.1	2.51556
0.411	3.06889	0.431	1.65622	0.431	1.78422	0.411	-0.0001102		0.411	0.431	0.431	1.32332	2.51342	1.42559																													21.2	4.31176	21.2	2.81556	21.2	2.53778
0.412	3.06667	0.432	1.67044	0.432	1.80444	0.412	-7.084e-05		0.412	0.432	0.432	1.33301	2.50853	1.43995																													21.3	4.31373	21.3	2.80222	21.3	2.53556
0.413	3.07667	0.433	1.67867	0.433	1.81333	0.413	-5.51e-05		0.413	0.433	0.433	1.3379	2.51364	1.44523																													21.4	4.31176	21.4	2.80667	21.4	2.52222
0.414	3.09667	0.434	1.67978	0.434	1.80911	0.414	-7.87e-06		0.414	0.434	0.434	1.3371	2.52688	1.44005																													21.5	4.30784	21.5	2.80667	21.5	2.52889
0.415	3.10556	0.435	1.68733	0.435	1.81822	0.415	7.872e-06		0.415	0.435	0.435	1.34143	2.53103	1.44549																													21.6	4.30588	21.6	2.81333	21.6	2.52444
0.416	3.11222	0.436	1.70378	0.436	1.84267	0.416	2.361e-05		0.416	0.436	0.436	1.3528	2.53335	1.46308																													21.7	4.31176	21.7	2.81111	21.7	2.53778
0.417	3.13556	0.437	1.70533	0.437	1.85511	0.417	0.0001417		0.417	0.437	0.437	1.35233	2.54921	1.4711																													21.8	4.29216	21.8	2.79333	21.8	2.53111
0.418	3.16556	0.438	1.70644	0.438	1.84778	0.418	0.0001574		0.418	0.438	0.438	1.3515	2.57043	1.46344																													21.9	4.3	21.9	2.80889	21.9	2.52444
0.419	3.17222	0.439	1.72622	0.439	1.84756	0.419	0.0001338		0.419	0.439	0.439	1.36544	2.57267	1.46142																													22	4.29804	22	2.80889	22	2.52
0.42	3.16667	0.44	1.74489	0.44	1.86244	0.42	0.0001259		0.42	0.44	0.44	1.37846	2.565	1.47133																													22.1	4.28431	22.1	2.80444	22.1	2.51778
0.421	3.18111	0.441	1.75333	0.441	1.86756	0.421	0.0001023		0.421	0.441	0.441	1.38338	2.57352	1.4735																													22.2	4.2902	22.2	2.80889	22.2	2.53556
0.422	3.21111	0.442	1.76089	0.442	1.86733	0.422	0.0001889		0.422	0.442	0.442	1.38758	2.59458	1.47146																													22.3	4.30196	22.3	2.80444	22.3	2.51778
0.423	3.22556	0.443	1.77733	0.443	1.87511	0.423	0.0002283		0.423	0.443	0.443	1.39876	2.60302	1.47571																													22.4	4.30784	22.4	2.79556	22.4	2.51778
0.424	3.22333	0.444	1.79889	0.444	1.89222	0.424	0.0002834		0.424	0.444	0.444	1.41393	2.59801	1.48729																													22.5	4.29216	22.5	2.80444	22.5	2.53111
0.425	3.22333	0.445	1.80378	0.445	1.90978	0.425	0.0002047		0.425	0.445	0.445	1.41597	2.59478	1.49918																													22.6	4.30196	22.6	2.79333	22.6	2.52222
0.426	3.23778	0.446	1.79889	0.446	1.91178	0.426	0.0003306		0.426	0.446	0.446	1.41033	2.60317	1.49883																													22.7	4.30196	22.7	2.8	22.7	2.51111
0.427	3.25111	0.447	1.80889	0.447	1.91422	0.427	0.0003542		0.427	0.447	0.447	1.41636	2.61064	1.49884																													22.8	4.29216	22.8	2.80667	22.8	2.52
0.428	3.25333	0.448	1.82467	0.448	1.93356	0.428	0.0003306		0.428	0.448	0.448	1.42689	2.60917	1.51204																													22.9	4.2902	22.9	2.8	22.9	2.52
0.429	3.25444	0.449	1.83267	0.449	1.94333	0.429	0.0003306		0.429	0.449	0.449	1.43131	2.60681	1.51774																													23	4.30392	23	2.79333	23	2.52444
0.43	3.26889	0.45	1.84022	0.45	1.94422	0.43	0.0005038		0.43	0.45	0.45	1.43537	2.61511	1.51649																													23.1	4.29412	23.1	2.79111	23.1	2.51778
0.431	3.29444	0.451	1.85733	0.451	1.94511	0.431	0.0005352		0.431	0.451	0.451	1.44686	2.63226	1.51524																													23.2	4.28627	23.2	2.78667	23.2	2.51333
0.432	3.30778	0.452	1.87467	0.452	1.95822	0.432	0.0005116		0.432	0.452	0.452	1.45849	2.63961	1.5235																													23.3	4.30196	23.3	2.79556	23.3	2.52
0.433	3.30333	0.453	1.87244	0.453	1.96644	0.433	0.0005274		0.433	0.453	0.453	1.45489	2.63276	1.52793																													23.4	4.29804	23.4	2.78889	23.4	2.51556
0.434	3.31	0.454	1.87222	0.454	1.96644	0.434	0.0005903		0.434	0.454	0.454	1.45284	2.63476	1.52596																													23.5	4.28824	23.5	2.78667	23.5	2.52667
0.435	3.33	0.455	1.888	0.455	1.96867	0.435	0.0005982		0.435	0.455	0.455	1.4632	2.64735	1.52572																													23.6	4.3	23.6	2.78444	23.6	2.52222
0.436	3.34444	0.456	1.902	0.456	1.98578	0.436	0.0006533		0.436	0.456	0.456	1.47215	2.65549	1.53699																													23.7	4.28627	23.7	2.79556	23.7	2.51333
0.437	3.34556	0.457	1.91156	0.457	2.00867	0.437	0.0006297		0.437	0.457	0.457	1.47763	2.65303	1.5527																													23.8	4.29608	23.8	2.78889	23.8	2.51556
0.438	3.35222	0.458	1.91467	0.458	2.01289	0.438	0.0006454		0.438	0.458	0.458	1.47812	2.65496	1.55395																													23.9	4.28431	23.9	2.78889	23.9	2.50222
0.439	3.37111	0.459	1.93111	0.459	2.01311	0.439	0.0007478		0.439	0.459	0.459	1.48889	2.66655	1.55211																													24	4.27843	24	2.78889	24	2.51111
0.44	3.39222	0.46	1.94644	0.46	2.02622	0.44	0.000795		0.44	0.46	0.46	1.49876	2.67986	1.56019																													24.1	4.29804	24.1	2.80444	24.1	2.52222
0.441	3.38889	0.461	1.94956	0.461	2.04067	0.441	0.0007478		0.441	0.461	0.461	1.49921	2.67383	1.56927																													24.2	4.29804	24.2	2.78667	24.2	2.50889
0.442	3.38556	0.462	1.956	0.462	2.048	0.442	0.0007871		0.442	0.462	0.462	1.50221	2.66782	1.57286																													24.3	4.30196	24.3	2.80222	24.3	2.51556
0.443	3.40556	0.463	1.97689	0.463	2.03978	0.443	0.0009367		0.443	0.463	0.463	1.51627	2.68017	1.56451																													24.4	4.2902	24.4	2.78222	24.4	2.51778
0.444	3.42556	0.464	1.99111	0.464	2.04689	0.444	0.0009445		0.444	0.464	0.464	1.52519	2.69249	1.56792																													24.5	4.28824	24.5	2.78889	24.5	2.51556
0.445	3.42889	0.465	1.99044	0.465	2.06911	0.445	0.00102		0.445	0.465	0.465	1.52269	2.69168	1.58287																													24.6	4.28824	24.6	2.78889	24.6	2.51333
0.446	3.42333	0.466	1.98889	0.466	2.08022	0.446	0.00111		0.446	0.466	0.466	1.51951	2.68389	1.58929																													24.7	4.28431	24.7	2.78667	24.7	2.52
0.447	3.43889	0.467	2.004	0.467	2.07356	0.447	0.00106		0.447	0.467	0.467	1.52905	2.69265	1.58212																													24.8	4.2902	24.8	2.78889	24.8	2.52222
0.448	3.46333	0.468	2.024	0.468	2.07422	0.448	0.00112		0.448	0.468	0.468	1.54229	2.70833	1.58056																													24.9	4.28039	24.9	2.79333	24.9	2.50889
0.449	3.47222	0.469	2.03556	0.469	2.08644	0.449	0.00127		0.449	0.469	0.469	1.54906	2.71181	1.58778																													25	4.27843	25	2.79778	25	2.51333
0.45	3.46778	0.47	2.04133	0.47	2.096	0.45	0.0012		0.45	0.47	0.47	1.55141	2.70487	1.59296																													25.1	4.28431	25.1	2.79111	25.1	2.51556
0.451	3.48222	0.471	2.05667	0.471	2.09622	0.451	0.00124		0.451	0.471	0.471	1.56101	2.71265	1.59103																													25.2	4.29216	25.2	2.80667	25.2	2.50444
0.452	3.50556	0.472	2.07089	0.472	2.09644	0.452	0.00129		0.452	0.472	0.472	1.56973	2.72732	1.5891																													25.3	4.28824	25.3	2.79111	25.3	2.51556
0.453	3.51222	0.473	2.06667	0.473	2.114	0.453	0.00139		0.453	0.473	0.473	1.56447	2.729	1.6003																													25.4	4.29608	25.4	2.78222	25.4	2.50889
0.454	3.50667	0.474	2.06244	0.474	2.13156	0.454	0.00141		0.454	0.474	0.474	1.55921	2.72117	1.61146																													25.5	4.28431	25.5	2.79111	25.5	2.51333
0.455	3.50778	0.475	2.08244	0.475	2.13711	0.455	0.00149		0.455	0.475	0.475	1.57225	2.71853	1.61352																													25.6	4.29216	25.6	2.78444	25.6	2.50222
0.456	3.52778	0.476	2.09622	0.476	2.13778	0.456	0.00154		0.456	0.476	0.476	1.58055	2.7305	1.61188																													25.7	4.28824	25.7	2.79111	25.7	2.52222
0.457	3.55	0.477	2.08978	0.477	2.14711	0.457	0.00152		0.457	0.477	0.477	1.5736	2.74415	1.61677																													25.8	4.28824	25.8	2.78444	25.8	2.50667
0.458	3.55222	0.478	2.09489	0.478	2.16333	0.458	0.00162		0.458	0.478	0.478	1.57536	2.74232	1.62683																													25.9	4.28039	25.9	2.78	25.9	2.49778
0.459	3.55333	0.479	2.11178	0.479	2.16956	0.459	0.00165		0.459	0.479	0.479	1.58595	2.73962	1.62934																													26	4.27255	26	2.79111	26	2.50444
0.46	3.56778	0.48	2.12644	0.48	2.17178	0.46	0.00162		0.46	0.48	0.48	1.59483	2.74719	1.62883																													26.1	4.27451	26.1	2.78667	26.1	2.51556
0.461	3.59111	0.481	2.13067	0.481	2.17933	0.461	0.00165		0.461	0.481	0.481	1.59587	2.76156	1.63232																													26.2	4.27843	26.2	2.79111	26.2	2.5
0.462	3.58667	0.482	2.14067	0.482	2.19044	0.462	0.00179		0.462	0.482	0.482	1.60122	2.75456	1.63845																													26.3	4.28824	26.3	2.79556	26.3	2.5
0.463	3.57556	0.483	2.15978	0.483	2.19956	0.463	0.00177		0.463	0.483	0.483	1.61335	2.74245	1.64307																													26.4	4.27647	26.4	2.79111	26.4	2.49778
0.464	3.59111	0.484	2.17533	0.484	2.19889	0.464	0.00168		0.464	0.484	0.484	1.6228	2.75079	1.64037																													26.5	4.28431	26.5	2.77778	26.5	2.51111
0.465	3.61667	0.485	2.17822	0.485	2.20111	0.465	0.00171		0.465	0.485	0.485	1.62278	2.76675	1.63983																													26.6	4.28039	26.6	2.76444	26.6	2.50444
0.466	3.63111	0.486	2.17822	0.486	2.21133	0.466	0.00168		0.466	0.486	0.486	1.6206	2.77417	1.64523																													26.7	4.26863	26.7	2.78222	26.7	2.50667
0.467	3.61889	0.487	2.19089	0.487	2.22889	0.467	0.00179		0.467	0.487	0.487	1.62783	2.76121	1.65606																													26.8	4.26667	26.8	2.78889	26.8	2.50889
0.468	3.61556	0.488	2.19711	0.488	2.23556	0.468	0.00177		0.468	0.488	0.488	1.63026	2.75505	1.65878																													26.9	4.26078	26.9	2.77556	26.9	2.5
0.469	3.63667	0.489	2.19378	0.489	2.23111	0.469	0.00177		0.469	0.489	0.489	1.62559	2.7675	1.65325																													27	4.27451	27	2.78	27	2.5
0.47	3.65444	0.49	2.20444	0.49	2.23111	0.47	0.00177		0.47	0.49	0.49	1.63129	2.77738	1.65102																													27.1	4.26275	27.1	2.77111	27.1	2.50222
0.471	3.65	0.491	2.22156	0.491	2.23778	0.471	0.00173		0.471	0.491	0.491	1.64173	2.77035	1.65372																													27.2	4.27647	27.2	2.77778	27.2	2.50444
0.472	3.64222	0.492	2.23556	0.492	2.23556	0.472	0.00171		0.472	0.492	0.492	1.64984	2.7608	1.64984																													27.3	4.26667	27.3	2.77556	27.3	2.49556
0.473	3.66111	0.493	2.23333	0.493	2.23111	0.473	0.00165		0.473	0.493	0.493	1.64597	2.77146	1.64433																													27.4	4.28824	27.4	2.78444	27.4	2.50889
0.474	3.69444	0.494	2.23333	0.494	2.24444	0.474	0.00163		0.474	0.494	0.494	1.64373	2.793	1.65191																													27.5	4.28235	27.5	2.77556	27.5	2.50889
0.475	3.70556	0.495	2.25556	0.495	2.26222	0.475	0.00164		0.475	0.495	0.495	1.65783	2.79769	1.66273																													27.6	4.27647	27.6	2.77556	27.6	2.49556
0.476	3.70778	0.496	2.27111	0.496	2.27111	0.476	0.0016		0.476	0.496	0.496	1.667	2.79566	1.667																													27.7	4.27059	27.7	2.78222	27.7	2.49778
0.477	3.72889	0.497	2.26222	0.497	2.27778	0.477	0.00154		0.477	0.497	0.497	1.65821	2.80785	1.66961																													27.8	4.26863	27.8	2.77333	27.8	2.50222
0.478	3.75222	0.498	2.26889	0.498	2.28222	0.478	0.0015		0.478	0.498	0.498	1.66083	2.82167	1.67059																													27.9	4.27059	27.9	2.78444	27.9	2.5
0.479	3.75556	0.499	2.29556	0.499	2.3	0.479	0.0015		0.479	0.499	0.499	1.67805	2.82042	1.6813																													28	4.26078	28	2.78	28	2.49778
0.48	3.74556	0.5	2.29778	0.5	2.30222	0.48	0.00144		0.48	0.5	0.5	1.67738	2.80917	1.68062																													28.1	4.26863	28.1	2.78667	28.1	2.49333
0.481	3.74333	0.501	2.29333	0.501	2.28667	0.481	0.00143		0.481	0.501	0.501	1.67184	2.80376	1.66698																													28.2	4.27647	28.2	2.77333	28.2	2.49556
0.482	3.75556	0.502	2.30889	0.502	2.28889	0.482	0.00141		0.482	0.502	0.502	1.68087	2.80916	1.66631																													28.3	4.26275	28.3	2.77333	28.3	2.5
0.483	3.76667	0.503	2.32667	0.503	2.30222	0.483	0.00139		0.483	0.503	0.503	1.69149	2.8137	1.67372																													28.4	4.26471	28.4	2.77556	28.4	2.50222
0.484	3.76556	0.504	2.33333	0.504	2.31333	0.484	0.00142		0.484	0.504	0.504	1.694	2.8091	1.67948																													28.5	4.26471	28.5	2.78222	28.5	2.49556
0.485	3.76667	0.505	2.32667	0.505	2.31111	0.485	0.00127		0.485	0.505	0.505	1.68683	2.80617	1.67556																													28.6	4.26078	28.6	2.76444	28.6	2.49111
0.486	3.77667	0.506	2.33556	0.506	2.31778	0.486	0.00124		0.486	0.506	0.506	1.69094	2.80984	1.67807																													28.7	4.26275	28.7	2.77111	28.7	2.48889
0.487	3.79889	0.507	2.35333	0.507	2.34222	0.487	0.00123		0.487	0.507	0.507	1.70146	2.82257	1.69343																													28.8	4.26078	28.8	2.77333	28.8	2.49111
0.488	3.81	0.508	2.36222	0.508	2.36	0.488	0.00124		0.488	0.508	0.508	1.70552	2.82702	1.70392																													28.9	4.27843	28.9	2.77333	28.9	2.48444
0.489	3.81333	0.509	2.36667	0.509	2.35556	0.489	0.0012		0.489	0.509	0.509	1.70637	2.82568	1.69836																													29	4.26471	29	2.76889	29	2.49333
0.49	3.80778	0.51	2.37556	0.51	2.34889	0.49	0.00123		0.49	0.51	0.51	1.7104	2.81776	1.6912																													29.1	4.26078	29.1	2.78	29.1	2.48889
0.491	3.82556	0.511	2.39111	0.511	2.36222	0.491	0.00113		0.491	0.511	0.511	1.71921	2.82709	1.69844																													29.2	4.26275	29.2	2.76444	29.2	2.49333
0.492	3.84111	0.512	2.40222	0.512	2.37556	0.492	0.00105		0.492	0.512	0.512	1.7248	2.83474	1.70565																													29.3	4.26863	29.3	2.76889	29.3	2.49333
0.493	3.82667	0.513	2.39556	0.513	2.37556	0.493	0.00106		0.493	0.513	0.513	1.71761	2.82025	1.70327																													29.4	4.27059	29.4	2.77333	29.4	2.49333
0.494	3.81889	0.514	2.4	0.514	2.36667	0.494	0.00124		0.494	0.514	0.514	1.7184	2.8107	1.69453																													29.5	4.26078	29.5	2.76667	29.5	2.50222
0.495	3.83667	0.515	2.42	0.515	2.37333	0.495	0.00119		0.495	0.515	0.515	1.7303	2.81995	1.69693																													29.6	4.26863	29.6	2.76222	29.6	2.49333
0.496	3.85889	0.516	2.43333	0.516	2.38444	0.496	0.00113		0.496	0.516	0.516	1.7374	2.83242	1.70249																													29.7	4.27451	29.7	2.76889	29.7	2.5
0.497	3.87222	0.517	2.42667	0.517	2.38889	0.497	0.0011		0.497	0.517	0.517	1.73021	2.83834	1.70328																													29.8	4.26667	29.8	2.77556	29.8	2.48889
0.498	3.87222	0.518	2.43111	0.518	2.39556	0.498	0.0011		0.498	0.518	0.518	1.73095	2.83447	1.70564																													29.9	4.27843	29.9	2.77778	29.9	2.49778
0.499	3.87889	0.519	2.45556	0.519	2.40889	0.499	0.00113		0.499	0.519	0.519	1.7459	2.83547	1.71272																													30	4.25882	30	2.76889	30	2.49333
0.5	3.91222	0.52	2.46222	0.52	2.42222	0.5	0.00112		0.5	0.52	0.52	1.74818	2.85592	1.71978																													30.1	4.01765	30.1	1.28756	30.1	2.44444
0.501	3.92667	0.521	2.44889	0.521	2.42444	0.501	0.00105		0.501	0.521	0.521	1.73626	2.86254	1.71893																													30.2	0.076	30.2	-0.01877	30.2	-0.0136
0.502	3.90667	0.522	2.45556	0.522	2.42	0.502	0.00106		0.502	0.522	0.522	1.73853	2.84405	1.71336																													30.3	0.00994	30.3	-0.01731	30.3	-0.01632
0.503	3.90556	0.523	2.47111	0.523	2.42667	0.503	0.00103		0.503	0.523	0.523	1.74708	2.83934	1.71565																													30.4	0.00335	30.4	-0.01498	30.4	-0.01229
0.504	3.92333	0.524	2.48889	0.524	2.44444	0.504	0.00106		0.504	0.524	0.524	1.75716	2.84834	1.72578																													30.5	0.00161	30.5	-0.01314	30.5	-0.00977
0.505	3.92667	0.525	2.49333	0.525	2.45333	0.505	0.00102		0.505	0.525	0.525	1.7578	2.84683	1.7296																													30.6	0.00108	30.6	-0.01177	30.6	-0.00822
0.506	3.91889	0.526	2.50444	0.526	2.44667	0.506	0.0009682		0.506	0.526	0.526	1.76313	2.83728	1.72245																													30.7	0.000946078	30.7	-0.01063	30.7	-0.00708
0.507	3.92778	0.527	2.52667	0.527	2.44222	0.507	0.00109		0.507	0.527	0.527	1.77625	2.83978	1.71688																													30.8	0.00101	30.8	-0.00972	30.8	-0.00615
0.508	3.96	0.528	2.52889	0.528	2.45111	0.508	0.00106		0.508	0.528	0.528	1.77528	2.85912	1.72068																													30.9	0.00112	30.9	-0.00892	30.9	-0.00545
0.509	3.97778	0.529	2.51333	0.529	2.46222	0.509	0.00102		0.509	0.529	0.529	1.76185	2.86798	1.72602																													31	0.00127	31	-0.00826	31	-0.00489
0.51	3.96889	0.53	2.52	0.53	2.45778	0.51	0.00101		0.51	0.53	0.53	1.764	2.8576	1.72044																													31.1	0.00144	31.1	-0.00767	31.1	-0.00438
0.511	3.96222	0.531	2.53778	0.531	2.46667	0.511	0.00103		0.511	0.531	0.531	1.77391	2.84884	1.7242																													31.2	0.00159	31.2	-0.00718	31.2	-0.00396
0.512	3.99	0.532	2.54667	0.532	2.48444	0.512	0.00102		0.512	0.532	0.532	1.77757	2.86482	1.73414																													31.3	0.00176	31.3	-0.00674	31.3	-0.00359
0.513	3.99667	0.533	2.54222	0.533	2.49333	0.513	0.00104		0.513	0.533	0.533	1.77193	2.86561	1.73785																													31.4	0.00192	31.4	-0.00635	31.4	-0.00326
0.514	3.98333	0.534	2.55556	0.534	2.49111	0.514	0.0009996		0.514	0.534	0.534	1.77867	2.85207	1.73381																													31.5	0.00205	31.5	-0.00599	31.5	-0.00297
0.515	3.99222	0.535	2.58444	0.535	2.48	0.515	0.00102		0.515	0.535	0.535	1.79619	2.85444	1.7236																													31.6	0.00219	31.6	-0.00568	31.6	-0.00274
0.516	4.01667	0.536	2.59333	0.536	2.48444	0.516	0.0009682		0.516	0.536	0.536	1.79977	2.8679	1.7242																													31.7	0.00231	31.7	-0.00538	31.7	-0.0025
0.517	4.04111	0.537	2.58	0.537	2.49778	0.517	0.0009918		0.517	0.537	0.537	1.78794	2.88131	1.73096																													31.8	0.00241	31.8	-0.00513	31.8	-0.00228
0.518	4.03556	0.538	2.58222	0.538	2.49333	0.518	0.0009918		0.518	0.538	0.538	1.7869	2.87332	1.72539																													31.9	0.00252	31.9	-0.00488	31.9	-0.00209
0.519	4.01889	0.539	2.59333	0.539	2.49111	0.519	0.00105		0.519	0.539	0.539	1.79199	2.85743	1.72136																													32	0.00261	32	-0.00466	32	-0.00192
0.52	4.02	0.54	2.59111	0.54	2.50444	0.52	0.00108		0.52	0.54	0.54	1.78787	2.8542	1.72807																													32.1	0.00269	32.1	-0.00444	32.1	-0.00174
0.521	4.04889	0.541	2.59111	0.541	2.52889	0.521	0.00101		0.521	0.541	0.541	1.78528	2.87066	1.7424																													32.2	0.00279	32.2	-0.00423	32.2	-0.00159
0.522	4.05889	0.542	2.61111	0.542	2.54444	0.522	0.0009996		0.522	0.542	0.542	1.79644	2.87369	1.75058																													32.3	0.00287	32.3	-0.00405	32.3	-0.00144
0.523	4.05889	0.543	2.64	0.543	2.54444	0.523	0.0009918		0.523	0.543	0.543	1.81368	2.86963	1.74803																													32.4	0.00295	32.4	-0.00389	32.4	-0.00129
0.524	4.06444	0.544	2.64222	0.544	2.54222	0.524	0.00104		0.524	0.544	0.544	1.81256	2.8695	1.74396																													32.5	0.00302	32.5	-0.00371	32.5	-0.00119
0.525	4.08111	0.545	2.63556	0.545	2.55333	0.525	0.0009603		0.525	0.545	0.545	1.80536	2.87718	1.74903																													32.6	0.00308	32.6	-0.00356	32.6	-0.00107
0.526	4.08667	0.546	2.64889	0.546	2.56667	0.526	0.0009682		0.526	0.546	0.546	1.81184	2.87701	1.7556																													32.7	0.00314	32.7	-0.00341	32.7	-0.000967778
0.527	4.07222	0.547	2.66889	0.547	2.56444	0.527	0.0009524		0.527	0.547	0.547	1.82285	2.86277	1.75152																													32.8	0.0032	32.8	-0.00329	32.8	-0.000858444
0.528	4.06667	0.548	2.67556	0.548	2.54222	0.528	0.000976		0.528	0.548	0.548	1.82473	2.8548	1.7338																													32.9	0.00325	32.9	-0.00316	32.9	-0.000762222
0.529	4.08444	0.549	2.66444	0.549	2.54889	0.529	0.0009996		0.529	0.549	0.549	1.81449	2.8632	1.73579																													33	0.00332	33	-0.00302	33	-0.000670444
0.53	4.10111	0.55	2.67333	0.55	2.56	0.53	0.0009682		0.53	0.55	0.55	1.81787	2.87078	1.7408																													33.1	0.00339	33.1	-0.00293	33.1	-0.000582889
0.531	4.09333	0.551	2.69111	0.551	2.54889	0.531	0.0009288		0.531	0.551	0.551	1.82726	2.86124	1.7307																													33.2	0.00346	33.2	-0.00282	33.2	-0.000506444
0.532	4.09333	0.552	2.67778	0.552	2.55111	0.532	0.0009603		0.532	0.552	0.552	1.81553	2.85715	1.72965																													33.3	0.0035	33.3	-0.00272	33.3	-0.000427556
0.533	4.11444	0.553	2.67556	0.553	2.56889	0.533	0.0009524		0.533	0.553	0.553	1.81135	2.86777	1.73914																													33.4	0.00356	33.4	-0.00263	33.4	-0.000357778
0.534	4.13556	0.554	2.69778	0.554	2.58667	0.534	0.0009367		0.534	0.554	0.554	1.8237	2.87835	1.74859																													33.5	0.00362	33.5	-0.00253	33.5	-0.00029
0.535	4.13111	0.555	2.72222	0.555	2.58222	0.535	0.0009367		0.535	0.555	0.555	1.8375	2.87112	1.743																													33.6	0.00365	33.6	-0.00245	33.6	-0.000230889
0.536	4.11778	0.556	2.72667	0.556	2.57333	0.536	0.0009603		0.536	0.556	0.556	1.83777	2.85774	1.73443																													33.7	0.00369	33.7	-0.00235	33.7	-0.000171844
0.537	4.14444	0.557	2.72222	0.557	2.58222	0.537	0.0009209		0.537	0.557	0.557	1.83206	2.8721	1.73784																													33.8	0.00373	33.8	-0.00227	33.8	-0.000101889
0.538	4.17333	0.558	2.74	0.558	2.59778	0.538	0.0009131		0.538	0.558	0.558	1.84128	2.88795	1.74571																													33.9	0.00377	33.9	-0.00219	33.9	-8.65778e-05
0.539	4.16667	0.559	2.75333	0.559	2.60444	0.539	0.0009209		0.539	0.559	0.559	1.84749	2.87917	1.74758																													34	0.00381	34	-0.00212	34	-9.97111e-05
0.54	4.16222	0.56	2.75333	0.56	2.60444	0.54	0.0009131		0.54	0.56	0.56	1.84473	2.87193	1.74498																													34.1	0.00384	34.1	-0.00206	34.1	5.77111e-05
0.541	4.17222	0.561	2.74667	0.561	2.61333	0.541	0.0008816		0.541	0.561	0.561	1.83752	2.87466	1.74832																													34.2	0.00388	34.2	-0.002	34.2	0.000105822
0.542	4.19889	0.562	2.75778	0.562	2.63333	0.542	0.0009524		0.542	0.562	0.562	1.8422	2.88884	1.75907																													34.3	0.0039	34.3	-0.00192	34.3	0.000156111
0.543	4.20889	0.563	2.76667	0.563	2.64667	0.543	0.0009052		0.543	0.563	0.563	1.84537	2.89151	1.76533																													34.4	0.00395	34.4	-0.00185	34.4	0.000202022
0.544	4.19111	0.564	2.77111	0.564	2.64	0.544	0.0008658		0.544	0.564	0.564	1.84556	2.8751	1.75824																													34.5	0.00398	34.5	-0.00179	34.5	0.000252222
0.545	4.20333	0.565	2.77111	0.565	2.63556	0.545	0.0009918		0.545	0.565	0.565	1.84279	2.87928	1.75264																													34.6	0.004	34.6	-0.00173	34.6	0.000291778
0.546	4.22222	0.566	2.78667	0.566	2.64889	0.546	0.0009445		0.546	0.566	0.566	1.85035	2.888	1.75886																													34.7	0.00402	34.7	-0.00167	34.7	0.000324444
0.547	4.23222	0.567	2.80889	0.567	2.64889	0.547	0.0009367		0.547	0.567	0.567	1.86229	2.89061	1.75621																													34.8	0.00406	34.8	-0.00161	34.8	0.000363778
0.548	4.22111	0.568	2.82222	0.568	2.63556	0.548	0.00104		0.548	0.568	0.568	1.86831	2.8788	1.74474																													34.9	0.00408	34.9	-0.00156	34.9	0.000379111
0.549	4.20333	0.569	2.81556	0.569	2.63333	0.549	0.00102		0.549	0.569	0.569	1.86108	2.86247	1.74063																															35	-0.00149	35	0.000418444
0.55	4.20222	0.57	2.81556	0.57	2.64889	0.55	0.0009209		0.55	0.57	0.57	1.85827	2.85751	1.74827																															35.1	-0.00143	35.1	0.000475333
0.551	4.21222	0.571	2.83778	0.571	2.66222	0.551	0.0009288		0.551	0.571	0.571	1.8701	2.8601	1.7544																															35.2	-0.0014	35.2	0.000514667
0.552	4.20667	0.572	2.84222	0.572	2.65556	0.552	0.0009209		0.552	0.572	0.572	1.87018	2.85212	1.74736																															35.3	-0.00135	35.3	0.000521333
0.553	4.20778	0.573	2.82667	0.573	2.65556	0.553	0.0009445		0.553	0.573	0.573	1.85712	2.84867	1.7447																															35.4	-0.00131	35.4	0.000595556
0.554	4.23222	0.574	2.82444	0.574	2.66889	0.554	0.0009524		0.554	0.574	0.574	1.85284	2.86098	1.75079																															35.5	-0.00126	35.5	0.000624
0.555	4.26444	0.575	2.84444	0.575	2.67778	0.555	0.0009131		0.555	0.575	0.575	1.86311	2.8785	1.75394																															35.6	-0.00121	35.6	0.000674222
0.556	4.28111	0.576	2.86444	0.576	2.67111	0.556	0.0008973		0.556	0.576	0.576	1.87335	2.88547	1.74691																															35.7	-0.00116	35.7	0.000694
0.557	4.26556	0.577	2.85333	0.577	2.66667	0.557	0.000858		0.557	0.577	0.577	1.86323	2.87072	1.74133																															35.8	-0.00114	35.8	0.000709333
0.558	4.26222	0.578	2.84889	0.578	2.69111	0.558	0.0009524		0.558	0.578	0.578	1.85748	2.86421	1.7546																															35.9	-0.00109	35.9	0.00074
0.559	4.28444	0.579	2.86667	0.579	2.70444	0.559	0.0009682		0.559	0.579	0.579	1.8662	2.87486	1.76059																															36	-0.00105	36	0.000728889
0.56	4.28667	0.58	2.88	0.58	2.69556	0.56	0.0009839		0.56	0.58	0.58	1.872	2.87207	1.75211																															36.1	-0.001	36.1	0.000805556
0.561	4.27111	0.581	2.87333	0.581	2.68889	0.561	0.0009682		0.561	0.581	0.581	1.86479	2.85737	1.74509																															36.2	-0.00097	36.2	0.000827333
0.562	4.26889	0.582	2.87556	0.582	2.70889	0.562	0.0009367		0.562	0.582	0.582	1.86336	2.85162	1.75536																															36.3	-0.000934889	36.3	0.000860222
0.563	4.29333	0.583	2.9	0.583	2.73333	0.563	0.0009367		0.563	0.583	0.583	1.8763	2.86365	1.76847																															36.4	-0.0009	36.4	0.000849111
0.564	4.31222	0.584	2.91333	0.584	2.72889	0.564	0.0009052		0.564	0.584	0.584	1.88201	2.87194	1.76286																															36.5	-0.000849556	36.5	0.000899556
0.565	4.31556	0.585	2.91111	0.585	2.71556	0.565	0.0009918		0.565	0.585	0.585	1.87767	2.86984	1.75153																															36.6	-0.00083	36.6	0.000928
0.566	4.30444	0.586	2.91111	0.586	2.72222	0.566	0.0009918		0.566	0.586	0.586	1.87476	2.85815	1.75311																															36.7	-0.000786222	36.7	0.000941111
0.567	4.31111	0.587	2.93778	0.587	2.73333	0.567	0.00103		0.567	0.587	0.587	1.88899	2.85827	1.75753																															36.8	-0.000766667	36.8	0.000916889
0.568	4.32333	0.588	2.95111	0.588	2.72667	0.568	0.0009918		0.568	0.588	0.588	1.89461	2.86205	1.75052																															36.9	-0.000731556	36.9	0.000973778
0.569	4.29667	0.589	2.93778	0.589	2.72444	0.569	0.0009839		0.569	0.589	0.589	1.88312	2.8401	1.74637																															37	-0.000679111	37	0.00101
0.57	4.28222	0.59	2.93333	0.59	2.73778	0.57	0.0009996		0.57	0.59	0.59	1.87733	2.82627	1.75218																															37.1	-0.000676889	37.1	0.00101
0.571	4.30667	0.591	2.95333	0.591	2.75333	0.571	0.00109		0.571	0.591	0.591	1.88718	2.83809	1.75938																															37.2	-0.000635333	37.2	0.00107
0.572	4.32889	0.592	2.96889	0.592	2.75778	0.572	0.00105		0.572	0.592	0.592	1.89415	2.84841	1.75946																															37.3	-0.000615778	37.3	0.00109
0.573	4.33778	0.593	2.96444	0.593	2.74667	0.573	0.00116		0.573	0.593	0.593	1.88835	2.84992	1.74963																															37.4	-0.000569778	37.4	0.00109
0.574	4.33222	0.594	2.95333	0.594	2.76222	0.574	0.00113		0.574	0.594	0.594	1.87832	2.84194	1.75677																															37.5	-0.000552222	37.5	0.00111
0.575	4.34111	0.595	2.96444	0.595	2.78222	0.575	0.00109		0.575	0.595	0.595	1.88242	2.84343	1.76671																															37.6	-0.000526	37.6	0.00116
0.576	4.37667	0.596	2.98222	0.596	2.78	0.576	0.00101		0.576	0.596	0.596	1.89073	2.86234	1.76252																															37.7	-0.000510667	37.7	0.00117
0.577	4.37667	0.597	2.97778	0.597	2.76444	0.577	0.00108		0.577	0.597	0.597	1.88493	2.85796	1.74989																															37.8	-0.000475778	37.8	0.00119
0.578	4.35222	0.598	2.96889	0.598	2.76222	0.578	0.00107		0.578	0.598	0.598	1.87634	2.83765	1.74572																															37.9	-0.000454	37.9	0.00121
0.579	4.38111	0.599	2.98889	0.599	2.77333	0.579	0.00108		0.579	0.599	0.599	1.88599	2.8521	1.74997																															38	-0.000421111	38	0.00124
0.58	4.40667	0.6	3.00889	0.6	2.78222	0.58	0.00103		0.58	0.6	0.6	1.8956	2.86433	1.7528																															38.1	-0.000390444	38.1	0.00123
0.581	4.39889	0.601	3.00222	0.601	2.78889	0.581	0.00105		0.581	0.601	0.601	1.8884	2.85488	1.75421																															38.2	-0.000375111	38.2	0.00125
0.582	4.37444	0.602	3.00444	0.602	2.79111	0.582	0.0009839		0.582	0.602	0.602	1.88679	2.83464	1.75282																															38.3	-0.000340222	38.3	0.00123
0.583	4.36556	0.603	3.01778	0.603	2.80222	0.583	0.0009603		0.583	0.603	0.603	1.89215	2.82451	1.75699																															38.4	-0.000331556	38.4	0.00126
0.584	4.38778	0.604	3.03333	0.604	2.81333	0.584	0.00102		0.584	0.604	0.604	1.89887	2.8345	1.76115																															38.5	-0.000311778	38.5	0.0013
0.585	4.38	0.605	3.02	0.605	2.79778	0.585	0.00106		0.585	0.605	0.605	1.8875	2.8251	1.74861																															38.6	-0.000287778	38.6	0.00131
0.586	4.36333	0.606	3.01111	0.606	2.79556	0.586	0.0009918		0.586	0.606	0.606	1.87893	2.80999	1.74443																															38.7	-0.000270222	38.7	0.00133
0.587	4.37778	0.607	3.03556	0.607	2.81556	0.587	0.00102		0.587	0.607	0.607	1.89115	2.81491	1.75409																															38.8	-0.000246222	38.8	0.00135
[truncated: 375,127+ more rows]
[truncated: 10 more columns]

## Sheet: Fig. 4
Fig. 4b					Fig. 4d			Fig. 4e					Fig. 4f
[truncated: 348 more rows]
[truncated: 129 more columns]

## Sheet: Fig. 5
Fig. 5c					Fig. 5d							Fig. 5e
[truncated: 1,152 more rows]

## Sheet: Fig. S3
B:C3N5-x		C3N5
[truncated: 1,362 more rows]

## Sheet: Fig. S4
B:C3N5-x		C3N5
[truncated: 1,816 more rows]

[truncated: 34 more sheets: Fig. S5, Fig. S6, Fig. S7, Fig. S8a, Fig. S9a, Fig. S14, Fig. S15, Fig. S16d, Fig. S17d, Fig. S18d, Fig. S19, Fig. S20, Fig. S22, Fig. S23, Fig. S24, Fig. S25, Fig. S26, Fig. S27, Fig. S29, Fig. S30 …]
